# Supplementary material for: Single-step in vitro ribosome reconstitution mediated by two GTPase factors, EngA and ObgE
Source: bioRxiv preprint, doi:10.1101/2024.10.17.618970, version 4 (2026-05-12)
Supplement: Supplementary Data 2 [file 618970_file03.xlsx]

## Sheet: Proteins
Checked	Accession	Description	Coverage [%]	# Peptides	# Unique Peptides	MW [kDa]	calc. pI	# PSMs	Abundances (Grouped): 1	Abundances (Grouped): 2	Abundances (Grouped): 3	Abundances (Grouped): 4	Abundance: F5: Sample, 1	Abundance: F6: Sample, 1	Abundance: F7: Sample, 2	Abundance: F8: Sample, 2	Abundance: F9: Sample, 3	Abundance: F10: Sample, 3	Abundance: F11: Sample, 4	Abundance: F12: Sample, 4
FALSE	P0CE47	Elongation factor Tu 1 [OS=Escherichia coli K-12]	87	29	29	43.3	5.45	904	161	125.9	98.2	14.9	1.85484e+09	2.13216e+09	1.73532e+09	1.39353e+09	1.18022e+09	1.24846e+09	1.83853e+08	1.85373e+08
	Positions in Master Proteins	Sequence	Modifications	# Missed Cleavages	PSM Charge (by Search Engine): Sequest HT	PSM m/z [Da] (by Search Engine): Sequest HT	PSM RT [min] (by Search Engine): Sequest HT	# PSMs	Abundances (Grouped): 1	Abundances (Grouped): 2	Abundances (Grouped): 3	Abundances (Grouped): 4	Abundance: F5: Sample, 1	Abundance: F6: Sample, 1	Abundance: F7: Sample, 2	Abundance: F8: Sample, 2	Abundance: F9: Sample, 3	Abundance: F10: Sample, 3	Abundance: F11: Sample, 4	Abundance: F12: Sample, 4
	P0CE47 [118-124]	EHILLGR		0	2	419.251	31.3013	30	159	130.4	98.5	12.1	70807544	81623768	68384544	56851688	45701676	48465988	5.45631e+06	6.08922e+06
	P0CE47 [125-137]	QVGVPYIIVFLNK		0	2	745.442	69.2695	24	216.6	77.9	89.8	15.8	2.64517e+07	31546502	1.15747e+07	9.33453e+06	1.21301e+07	1.18176e+07	2.34595e+06	1.88491e+06
	P0CE47 [138-155]	CDMVDDEELLELVEMEVR	1xCarbamidomethyl [C1]	0	2	1112.5	75.6074	12	263.8	66.8	56	13.5	2.20503e+06	2.93935e+06	739352	561510	522093	560113	163234	103479
	P0CE47 [138-155]	CDMVDDEELLELVEMEVR	1xCarbamidomethyl [C1]; 1xOxidation [M]	0	2	1120.49	73.1889	22	221.3	94.8	68	15.9	3925094	5171044	2.12124e+06	1.7567e+06	1.24803e+06	1.53326e+06	402941	259044
	P0CE47 [138-155]	CDMVDDEELLELVEMEVR	1xCarbamidomethyl [C1]; 2xOxidation [M3; M15]	0	3	752.663	71.3936	15	183.3	93.4	100.7	22.6	2.4847e+06	3.34344e+06	1.58859e+06	1.35865e+06	1.41151e+06	1775563	414100	305452
	P0CE47 [156-172]	ELLSQYDFPGDDTPIVR		0	2	982.983	56.6675	32	178.4	114.5	90.6	16.5	4.12199e+07	49225263	3.41624e+07	24482817	2.14906e+07	2.43471e+07	4.58973e+06	3.77875e+06
	P0CE47 [178-188]	ALEGDAEWEAK		0	2	609.785	38.0065	17	169.6	120.2	97	13.3	67321904	74386024	57114908	44014336	38765988	42226468	5440765	5653777
	P0CE47 [189-205]	ILELAGFLDSYIPEPER		0	2	981.514	72.5541	25	210.4	96.1	76.6	16.9	4.90214e+07	6.30158e+07	2.9398e+07	2.19457e+07	1.88328e+07	2.17644e+07	5.57136e+06	3.56931e+06
	P0CE47 [206-224]	AIDKPFLLPIEDVFSISGR		0	3	706.393	70.3549	31	200.5	110.4	72.5	16.7	9.41223e+07	1.15498e+08	5.66014e+07	5.81933e+07	3.36641e+07	4.21957e+07	1.00334e+07	7.49789e+06
	P0CE47 [239-249]	VGEEVEIVGIK		0	2	586.332	45.3907	26	166.1	121.6	98.3	13.9	163880512	180678848	147048336	107896944	100332768	103399256	14352067	14539719
	P0CE47 [254-263]	STCTGVEMFR	1xCarbamidomethyl [C3]	0	2	594.262	41.1696	12	178	117.6	94.2	10.2	22939332	28461812	18835570	15139693	13295255	13750418	1.39455e+06	1.53585e+06
	P0CE47 [254-263]	STCTGVEMFR	1xCarbamidomethyl [C3]; 1xOxidation [M8]	0	2	602.26	33.8741	26	144.6	149.3	96.7	9.4	41901402	43713566	48511104	40241784	28352947	28905779	2.60553e+06	2.97642e+06
	P0CE47 [254-264]	STCTGVEMFRK	1xCarbamidomethyl [C3]	1	2	658.308	34.8247	4	250.6	53.9	78.6	16.9	3.70681e+06	4.35517e+06	1.00611e+06	741154	1.22952e+06	1.29233e+06	248831	294128
	P0CE47 [254-264]	STCTGVEMFRK	1xCarbamidomethyl [C3]; 1xOxidation [M8]	1	3	444.541	28.6999	1	213.4	80.3	89.6	16.7	3.27392e+06	3.70248e+06	1.45007e+06	1.18318e+06	1.50299e+06	1.42385e+06	253166	293962
	P0CE47 [26-38]	TTLTAAITTVLAK		0	2	652.396	61.6695	48	156.7	126.3	103.2	13.9	2.22484e+08	2.47901e+08	2.12161e+08	1.68849e+08	1.46305e+08	1.63395e+08	2.13934e+07	2.02626e+07
	P0CE47 [264-270]	KLLDEGR		1	2	415.74	24.3229	17	164	125.3	97.3	13.4	15029305	16296768	13012398	10994880	8961844	9616147	1.29362e+06	1.26468e+06
	P0CE47 [265-270]	LLDEGR		0	2	351.693	25.3254	8	96.2	169.1	119.4	15.3	14458549	21206340	34005284	27871450	22631528	20877272	2476822	3.12868e+06
	P0CE47 [271-280]	AGENVGVLLR		0	2	514.299	42.9875	31	168.7	119.9	97.9	13.5	1.49092e+08	161064256	118318656	1.02431e+08	91004432	88876560	12013330	12870770
	P0CE47 [290-304]	GQVLAKPGTIKPHTK		0	3	525.651	24.0601	43	187.9	94.8	100.1	17.2	4.86125e+07	5.22347e+07	2.87885e+07	2.24569e+07	2.63692e+07	2.73244e+07	4.22733e+06	5.01681e+06
	P0CE47 [305-314]	FESEVYILSK		0	2	607.819	48.0457	21	152.1	128.2	103.6	16.1	120361560	118734592	107609568	94342032	77047184	85956776	13049145	12271618
	P0CE47 [305-319]	FESEVYILSKDEGGR		1	3	576.953	44.9279	9	289.5	7	66.9	36.6	2.95203e+06	3.07024e+06	90877.3	58726.5	709570	681434	364458	398581
	P0CE47 [320-325]	HTPFFK		0	2	388.708	31.697	17	173.6	123.6	90.6	12.2	79546544	92402696	66162576	56317592	44349856	45089856	5.53379e+06	6523798
	P0CE47 [326-334]	GYRPQFYFR		0	3	411.877	44.3851	29	198.9	100.8	89	11.4	52356301	60382336	32284194	2.51355e+07	25348842	24955006	2.99539e+06	3.44937e+06
	P0CE47 [335-358]	TTDVTGTIELPEGVEMVMPGDNIK		0	2	1273.62	62.5432	12	200.9	79	101.7	18.5	12040611	1.47394e+07	6.03715e+06	4.54133e+06	6.21873e+06	7.31125e+06	1.40018e+06	1.07467e+06
	P0CE47 [335-358]	TTDVTGTIELPEGVEMVMPGDNIK	1xOxidation [M]	0	3	854.747	58.385	26	166.9	113.2	102.2	17.7	1.26725e+07	14249926	1.03696e+07	8.01843e+06	7.57553e+06	8.9448e+06	1.59892e+06	1.26656e+06
	P0CE47 [335-358]	TTDVTGTIELPEGVEMVMPGDNIK	2xOxidation [M16; M18]	0	2	1289.62	53.1556	11	152	119	109.9	19.1	2.31881e+07	25331965	2.17432e+07	16555414	1.73197e+07	17714689	3.03249e+06	3.04111e+06
	P0CE47 [359-374]	MVVTLIHPIAMDDGLR		0	2	890.976	55.5583	15	224.4	60.1	97	18.5	28017031	35541642	9.88408e+06	7.23274e+06	1.27649e+07	1.4568e+07	2.7752e+06	2.43547e+06
	P0CE47 [359-374]	MVVTLIHPIAMDDGLR	1xOxidation [M]	0	3	599.653	52.4749	45	179	105.9	98.8	16.3	4.95472e+07	6.33708e+07	3.8743e+07	2.83994e+07	2.85946e+07	3.34732e+07	5.20806e+06	4.98601e+06
	P0CE47 [359-374]	MVVTLIHPIAMDDGLR	2xOxidation [M1; M11]	0	3	604.983	47.6288	24	156.6	132.2	97.4	13.8	7.1835e+07	8.14743e+07	7.00427e+07	5.95878e+07	4.46779e+07	5.06683e+07	6.63442e+06	6.83143e+06
	P0CE47 [383-391]	TVGAGVVAK		0	2	401.245	25.4885	19	109	161	115.2	14.8	33211136	54939356	69616464	57146852	46211696	44114864	5.14135e+06	6.56606e+06
	P0CE47 [39-45]	TYGGAAR		0	2	348.177	19.3675	7	43.2	181.2	155.6	19.9	2.65528e+06	3.74002e+06	14645574	11910100	11353214	11326419	1.28786e+06	1.63805e+06
	P0CE47 [46-57]	AFDQIDNAPEEK		0	2	688.819	36.218	21	156.9	129	99.9	14.2	1.1729e+08	1.34013e+08	1.15944e+08	9.15561e+07	8.01705e+07	7.9532e+07	1.04127e+07	1.22903e+07
	P0CE47 [46-59]	AFDQIDNAPEEKAR		1	3	535.263	33.4418	1	78.6	246.8	61.6	13	251586	312670	996611	778860	219790	219777	41417.6	51930.9
	P0CE47 [60-75]	GITINTSHVEYDTPTR		0	2	902.446	39.5509	58	159.3	127.1	99.8	13.8	1.40646e+08	1.61931e+08	1.39172e+08	1.04157e+08	9.08527e+07	9.83495e+07	1.25403e+07	1.36545e+07
	P0CE47 [76-90]	HYAHVDCPGHADYVK	1xCarbamidomethyl [C7]	0	4	442.952	27.2166	16	128.8	136.9	113.4	20.8	3.08e+07	3.82866e+07	4.55347e+07	2.92556e+07	3.04903e+07	2.99634e+07	5.26385e+06	5.85234e+06
	P0CE47 [9-25]	TKPHVNVGTIGHVDHGK		0	3	599.322	25.8602	30	16.4	271.7	86.5	25.4	3.67986e+06	4.49806e+06	73851448	6.16749e+07	23046982	2.00567e+07	5.55451e+06	7.181e+06
	P0CE47 [91-117]	NMITGAAQMDGAILVVAATDGPMPQTR		0	3	910.453	67.4567	16	193.2	93.1	77.2	36.4	3.83547e+06	6.55872e+06	3.06669e+06	1.90338e+06	2.14686e+06	1.87256e+06	1.15761e+06	772581
	P0CE47 [91-117]	NMITGAAQMDGAILVVAATDGPMPQTR	1xOxidation [M]	0	3	915.782	63.057	39	157.3	108.1	100.9	33.6	6.82456e+06	8.92172e+06	6.35751e+06	4.52358e+06	4.51614e+06	5.54637e+06	2.07351e+06	1.33873e+06
	P0CE47 [91-117]	NMITGAAQMDGAILVVAATDGPMPQTR	2xOxidation [M9; M]	0	3	921.116	58.7749	42	151.8	122	100.9	25.3	8.61623e+06	1.08561e+07	8.99398e+06	6.7246e+06	6.17722e+06	6.69509e+06	1.88624e+06	1.37353e+06
	P0CE47 [91-117]	NMITGAAQMDGAILVVAATDGPMPQTR	3xOxidation [M2; M9; M23]	0	3	926.448	55.9489	22	167.2	115.9	101	15.8	1.1576e+07	1.24423e+07	9.34724e+06	7.40431e+06	6.67567e+06	7.87608e+06	1.2255e+06	1.05027e+06
FALSE	strep-sfGFP	strep-sfGFP	93	25	25	29.2	6.4	821	271.4	127.9	0.5	0.3	8.00501e+09	9.18347e+09	4.47784e+09	3.64503e+09	2.05012e+07	1.00898e+07	1.21207e+07	6.13436e+06
	Positions in Master Proteins	Sequence	Modifications	# Missed Cleavages	PSM Charge (by Search Engine): Sequest HT	PSM m/z [Da] (by Search Engine): Sequest HT	PSM RT [min] (by Search Engine): Sequest HT	# PSMs	Abundances (Grouped): 1	Abundances (Grouped): 2	Abundances (Grouped): 3	Abundances (Grouped): 4	Abundance: F5: Sample, 1	Abundance: F6: Sample, 1	Abundance: F7: Sample, 2	Abundance: F8: Sample, 2	Abundance: F9: Sample, 3	Abundance: F10: Sample, 3	Abundance: F11: Sample, 4	Abundance: F12: Sample, 4
	strep-sfGFP [1-12]	MASTWSHPQFEK		0	3	483.56	38.2389	8	169	31			1.72123e+07	2.13729e+07	4.23245e+06	2.91497e+06
	strep-sfGFP [1-12]	MASTWSHPQFEK	1xOxidation [M1]	0	3	488.89	35.9244	19	145.9	54.1			3.56897e+07	4.11825e+07	1.68272e+07	1.19797e+07
	strep-sfGFP [101-106]	RHDFFK		1	2	425.222	26.7834	1	243.7	156	0.3	0	56722540	56423668	38391596	34155484	125511	44965.6	10453.3
	strep-sfGFP [107-117]	SAMPEGYVQER		0	2	633.792	35.8459	28	223.1	76.8	0.1		2.14792e+08	2.4626e+08	97405448	6.43808e+07	99488.9	77953.6
	strep-sfGFP [107-117]	SAMPEGYVQER	1xOxidation [M3]	0	2	641.79	31.1488	63	267	132.8	0.2	0	6.32133e+08	7.28661e+08	3.89816e+08	292212425	440748	368694	60287	61524.1
	strep-sfGFP [118-128]	TISFKDDGTYK		1	2	637.816	34.6241	30	339.2	60.6	0.1	0	2.25424e+08	2.6334e+08	5.11326e+07	3.70476e+07	135825	75997	8648.98	6564.83
	strep-sfGFP [123-128]	DDGTYK		0	1	698.298	18.7616	5	108.9	91.1			1.64697e+06	1.90717e+06	489917	4.48473e+06
	strep-sfGFP [13-24]	LEVLFQGPHMSK		0	2	693.365	45.9992	36	303.1	96.6	0.3	0	588834528	680572080	220359008	184852910	821464	394164	72502	41144.2
	strep-sfGFP [13-24]	LEVLFQGPHMSK	1xOxidation [M10]	0	2	701.363	41.7503	100	239.8	159.5	0.6	0.1	7.47533e+08	7.98231e+08	5.59401e+08	4.71797e+08	2.55247e+06	1.32755e+06	325561	173382
	strep-sfGFP [131-143]	AEVKFEGDTLVNR		1	2	739.387	39.5974	4	199.1	0.9			9.85856e+06	1.16929e+07	75479	34626.6
	strep-sfGFP [135-143]	FEGDTLVNR		0	2	525.765	36.6213	79	265.5	134.2	0.3	0	1.62013e+09	1.88233e+09	9.89157e+08	7.87811e+08	2.53815e+06	1.27589e+06	257866	169080
	strep-sfGFP [148-161]	GIDFKEDGNILGHK		1	2	771.898	42.0313	99	298.5	101.2	0.2	0	1.13295e+09	1.27055e+09	4.32316e+08	3.82753e+08	1.31075e+06	759281	193703	95893.4
	strep-sfGFP [153-161]	EDGNILGHK		0	2	491.751	26.63	42	241.1	158.7	0.2	0	3.37409e+08	3.95108e+08	2.58692e+08	2.23448e+08	260141	210871	28437.4	21938.6
	strep-sfGFP [162-177]	LEYNFNSHNVYITADK		0	3	643.313	46.9076	77	295.5	103.9	0.5	0.2	1.23183e+09	1.37899e+09	5.09195e+08	4.12293e+08	3.50937e+06	1.39571e+06	923977	543219
	strep-sfGFP [162-179]	LEYNFNSHNVYITADKQK		1	3	728.697	42.1036	6	178.8	21.2			1.12999e+07	1.4287e+07	1.63312e+06	1.38364e+06
	strep-sfGFP [188-230]	IRHNVEDGSVQLADHYQQNTPIGDGPVLLPDNHYLSTQSVLSK		1	4	1189.6	52.4214	2	116.8	277.1	3.2	2.9	6.1093e+06	6062328	16324710	12763619	276199	103218	145739	156781
	strep-sfGFP [190-230]	HNVEDGSVQLADHYQQNTPIGDGPVLLPDNHYLSTQSVLSK		0	4	1122.3	54.1364	27	285.3	112.1	1	1.6	4.23573e+08	4.64659e+08	2.03386e+08	1.49318e+08	2.2315e+06	1.04711e+06	3.86292e+06	1.55935e+06
	strep-sfGFP [236-259]	RDHMVLLEFVTAAGITHGMDELYK		1	4	687.348	66.533	3	67.7	310.6	14.5	7.2	94301.5	165039	652768	502578	26821.4		13217.9
	strep-sfGFP [236-259]	RDHMVLLEFVTAAGITHGMDELYK	1xOxidation [M]	1	4	691.347	62.7921	3	35.6	348.4	7.1	8.9	226416	245997	2959037	1.8035e+06	74200.6	29498.8	91039.4	38371.8
	strep-sfGFP [236-259]	RDHMVLLEFVTAAGITHGMDELYK	2xOxidation [M4; M19]	1	4	695.346	57.01	8	16.2	367.4	9.6	6.8	166344	158126	4072065	3315823	152867	60294.3	113203	40500
	strep-sfGFP [237-259]	DHMVLLEFVTAAGITHGMDELYK		0	3	864.094	71.3346	8	184.3	206.2	4.8	4.8	954285	1.43206e+06	1.54647e+06	1.10656e+06	56255.9	16306.3	47254.7	19288.1
	strep-sfGFP [237-259]	DHMVLLEFVTAAGITHGMDELYK	1xOxidation [M]	0	3	869.426	67.3282	15	138.7	247.9	7.4	6	1.73341e+06	2.41867e+06	4.31368e+06	3.10591e+06	200694	59012.9	108580	72814.1
	strep-sfGFP [237-259]	DHMVLLEFVTAAGITHGMDELYK	2xOxidation [M3; M18]	0	3	874.758	61.7027	8	101.1	281.2	10.9	6.7	1.95449e+06	2.45489e+06	6880818	5.39621e+06	383466	146312	201259	105588
	strep-sfGFP [25-47]	GEELFTGVVPILVELDGDVNGHK		0	2	1219.13	74.3046	76	280.9	115.1	1.8	2.2	4.73792e+08	5.75997e+08	2.35735e+08	1.9424e+08	4.81223e+06	2.36706e+06	5.60759e+06	3.0131e+06
	strep-sfGFP [48-62]	FSVRGEGEGDATNGK		1	3	508.575	28.0953	1	115.8	84.2			170045	189529	150282	113441
	strep-sfGFP [52-62]	GEGEGDATNGK		0	2	517.723	17.6461	1	56.3	243.4	0.3		5669051	9056827	26030704	36845864	51010.5	37590.5
	strep-sfGFP [52-66]	GEGEGDATNGKLTLK		1	3	497.255	30.7997	1	168.2	31.8			342485	407772	68612.1	72487.8
	strep-sfGFP [67-73]	FICTTGK	1xCarbamidomethyl [C3]	0	2	413.709	26.3274	41	173.3	226.5	0.2	0	1.77876e+08	2.58313e+08	3.11778e+08	2.51845e+08	300668	208985	21145.5	15822.1
	strep-sfGFP [67-94]	FICTTGKLPVPWPTLVTTLTYGVQCFSR	2xCarbamidomethyl [C3; C25]	1	3	1081.56	77.8172	8	221.8	160.3	11.6	6.2	526529	715564	686355	286720	32101.2		17233.5
	strep-sfGFP [74-94]	LPVPWPTLVTTLTYGVQCFSR	1xCarbamidomethyl [C18]	0	3	812.432	81.9877	2	72.4	127.6			84421.9	135076	188061
	strep-sfGFP [95-100]	YPDHMK		0	2	395.682	22.2664	13	165.1	134.8	0.1		27019410	47038668	34744832	24392940	29317.5	24591.6
	strep-sfGFP [95-100]	YPDHMK	1xOxidation [M5]	0	2	403.678	18.7023	4	115.5	284.1	0.4	0.1	20859982	22490456	58906600	48146428	79903.2	58752.7	10077.1
	strep-sfGFP [95-101]	YPDHMKR	1xOxidation [M5]	1	3	321.488	17.9437	3	132.3	67.7			397069	621070	290845	222265
FALSE	C4ZUJ5	Elongation factor G [OS=Escherichia coli BW2952]	71	36	36	77.5	5.38	385	190.6	128.6	59.2	21.7	1.45108e+08	1.71101e+08	1.19012e+08	9.49374e+07	4.70656e+07	5.0878e+07	1.82468e+07	1.7574e+07
	Positions in Master Proteins	Sequence	Modifications	# Missed Cleavages	PSM Charge (by Search Engine): Sequest HT	PSM m/z [Da] (by Search Engine): Sequest HT	PSM RT [min] (by Search Engine): Sequest HT	# PSMs	Abundances (Grouped): 1	Abundances (Grouped): 2	Abundances (Grouped): 3	Abundances (Grouped): 4	Abundance: F5: Sample, 1	Abundance: F6: Sample, 1	Abundance: F7: Sample, 2	Abundance: F8: Sample, 2	Abundance: F9: Sample, 3	Abundance: F10: Sample, 3	Abundance: F11: Sample, 4	Abundance: F12: Sample, 4
	C4ZUJ5 [105-128]	VLDGAVMVYCAVGGVQPQSETVWR	1xCarbamidomethyl [C10]	0	3	874.434	63.2163	1	193.4	59.5	47.1		264145	409380	110028	93190.9		80080.8
	C4ZUJ5 [105-128]	VLDGAVMVYCAVGGVQPQSETVWR	1xOxidation [M7]; 1xCarbamidomethyl [C10]	0	3	879.765	57.5229	1	161.6	92.4	46		201184	213176	139091	100765	71084.4	48754.9
	C4ZUJ5 [12-23]	NIGISAHIDAGK		0	2	598.325	35.1068	10	192.9	142	48.7	16.4	6571832	6.97438e+06	5.68232e+06	4.3719e+06	1.65238e+06	1.766e+06	553617	599480
	C4ZUJ5 [147-153]	MGANFLK	1xOxidation [M1]	0	2	398.705	33.3963	3	180.5	138.2	62.7	18.7	1.31562e+06	1592028	1.23594e+06	993773	507218	498410	149744
	C4ZUJ5 [154-159]	VVNQIK		0	2	350.721	21.3285	9	77.4	217.6	82.5	22.5	566992	771662	2.01912e+06	1.71307e+06	680434	729999	159123	233034
	C4ZUJ5 [162-187]	LGANPVPLQLAIGAEEHFTGVVDLVK		0	3	896.497	73.9932	6	188.5	115.3	57.7	38.5	2810886	6.07492e+06	2.99231e+06	2.13535e+06	1.18865e+06	1.34405e+06	1.0788e+06	661816
	C4ZUJ5 [237-249]	YLGGEELTEAEIK		0	2	726.366	46.0512	7	186.4	132.8	60	20.8	7.73862e+06	8597216	6416378	5.2656e+06	2522298	2.73385e+06	930756	886687
	C4ZUJ5 [256-271]	VLNNEIILVTCGSAFK	1xCarbamidomethyl [C11]	0	2	889.48	57.9712	10	207	118.6	56.6	17.8	3.05482e+06	3.12929e+06	1.98648e+06	1.57921e+06	765653	934983	283573	249942
	C4ZUJ5 [30-39]	ILFYTGVNHK		0	2	596.33	41.2021	11	200	121.6	58.9	19.5	5270443	6.05686e+06	4.13267e+06	2.85594e+06	1.66283e+06	1668117	535660	567321
	C4ZUJ5 [310-323]	HASDDEPFSALAFK		0	2	767.862	50.5577	25	188.2	129.9	59.8	22.2	3.69267e+06	4.32096e+06	3.10509e+06	2.44764e+06	1.18368e+06	1.36069e+06	508449	435175
	C4ZUJ5 [324-337]	IATDPFVGNLTFFR		0	2	799.422	65.5679	9	213.7	108.3	54.3	23.7	4249465	4692257	2.52249e+06	2.03014e+06	1.11459e+06	1.1544e+06	499925	489263
	C4ZUJ5 [338-354]	VYSGVVNSGDTVLNSVK		0	2	869.456	47.6118	11	211.2	121.7	49.6	17.5	8.32422e+06	9.88679e+06	5.81215e+06	4.70609e+06	2.04126e+06	2.22089e+06	763175	743176
	C4ZUJ5 [363-370]	IVQMHANK		0	2	470.754	21.0273	1	132.1	163	81.1	23.9	554622	880876	893490	832167	363224	506379	123756	128721
	C4ZUJ5 [363-370]	IVQMHANK	1xOxidation [M4]	0	2	478.753	17.1237	2	54.6	210.3	105	30.1	165221	189341	761662	609229	342406	337494	86772.4	109602
	C4ZUJ5 [379-389]	AGDIAAAIGLK		0	2	500.296	48.4801	8	193.6	121.3	64.8	20.3	7184460	8024735	4697131	4813043	2.61354e+06	2.47179e+06	815742	775828
	C4ZUJ5 [390-408]	DVTTGDTLCDPDAPIILER	1xCarbamidomethyl [C9]	0	2	1051.01	54.2583	12	176.8	147.3	56.8	19.2	2.33732e+06	2.60656e+06	2.28233e+06	1.85205e+06	709747	885570	262104	272930
	C4ZUJ5 [40-59]	IGEVHDGAATMDWMEQEQER		0	3	778.002	47.5976	6	259.5	71.8	49.8	19	1.02007e+06	1.35192e+06	362406	291312	207577	244503	81039.6	90798.5
	C4ZUJ5 [40-59]	IGEVHDGAATMDWMEQEQER	1xOxidation [M]	0	3	783.336	41.1254	7	195.4	127.2	56.3	21.1	578102	769680	490530	384177	176426	209194	72786.9	71314.5
	C4ZUJ5 [40-59]	IGEVHDGAATMDWMEQEQER	2xOxidation [M11; M14]	0	3	788.667	37.0899	4	186.5	123.4	68.6	21.4	1237028	1.51715e+06	1.03852e+06	791332	500729	507592	158218	155653
	C4ZUJ5 [409-423]	MEFPEPVISIAVEPK		0	2	843.446	60.8606	6	236.3	91.9	52.5	19.3	2364753	3.21418e+06	1.34061e+06	857634	566751	662101	223093	227611
	C4ZUJ5 [409-423]	MEFPEPVISIAVEPK	1xOxidation [M1]	0	2	851.441	56.2264	8	188.9	135.1	55.5	20.5	2832008	3.19228e+06	2.50349e+06	1.84634e+06	825778	945711	300078	353142
	C4ZUJ5 [431-437]	MGLALGR		0	2	359.208	38.4588	1	225.4	84.6	66.5	23.5	1.21313e+06	1.51998e+06	639720	405484	380128	421733	148617	135304
	C4ZUJ5 [431-437]	MGLALGR	1xOxidation [M1]	0	2	367.206	32.5005	3	189.7	131.4	59.1	19.8	1.26287e+06	1.42799e+06	1.03049e+06	838664	422721	413837	137851	142579
	C4ZUJ5 [447-472]	VWTDEESNQTIIAGMGELHLDIIVDR		0	3	985.49	67.9067	1	167.3	47	70.3	115.5	35603.4	123227	16186.7	21362.3	22528.4	34356.9	47986.2	43609.3
	C4ZUJ5 [475-491]	REFNVEANVGKPQVAYR		1	4	495.014	38.0212	17	202	117.2	57.7	23.1	4.47121e+06	5.54962e+06	3.41047e+06	2.44966e+06	1.35028e+06	1.49637e+06	561338	576852
	C4ZUJ5 [476-491]	EFNVEANVGKPQVAYR		0	3	607.648	41.8333	9	200.6	126	55.3	18.1	4.41245e+06	5.24102e+06	3.35792e+06	2.71789e+06	1.27465e+06	1.37863e+06	405738	461421
	C4ZUJ5 [498-504]	VTDVEGK		0	2	374.197	19.8429	2	49.5	230.4	94.9	25.1	266627	366421	1.4911e+06	1.41862e+06	625747	573838	133758	187292
	C4ZUJ5 [513-532]	GQYGHVVIDMYPLEPGSNPK		0	3	734.361	51.2609	7	234.5	85.5	54.4	25.7	2.22768e+06	2800766	1015016	816619	486044	691270	289116	258465
	C4ZUJ5 [513-532]	GQYGHVVIDMYPLEPGSNPK	1xOxidation [M10]	0	3	739.692	45.495	12	189.1	137.6	53.9	19.5	3638823	3.80212e+06	3229189	2.26935e+06	1.01594e+06	1.10522e+06	388882	378329
	C4ZUJ5 [533-541]	GYEFINDIK		0	2	549.778	48.5889	13	179.8	140.7	58.2	21.3	5849424	5938419	4866993	4366905	1.89723e+06	1.91716e+06	734380	666766
	C4ZUJ5 [542-555]	GGVIPGEYIPAVDK		0	2	707.883	49.6017	12	189.1	124.3	62.6	24.1	2.98937e+06	3262341	2329177	1.80865e+06	968869	1.10155e+06	407786	388151
	C4ZUJ5 [556-562]	GIQEQLK		0	2	408.235	28.645	4	169.8	155	57.3	17.9	2.74214e+06	3.769e+06	3265534	2639816	1.10783e+06	1.06272e+06	324503	353588
	C4ZUJ5 [563-577]	AGPLAGYPVVDMGIR		0	2	758.403	55.9871	7	223.7	100.7	54.3	21.3	1.9439e+06	2.43543e+06	1073624	892868	521873	535053	218052	196365
	C4ZUJ5 [563-577]	AGPLAGYPVVDMGIR	1xOxidation [M12]	0	2	766.401	49.8749	9	180.3	137.7	59.9	22	2.16456e+06	2.22807e+06	1832206	1535805	710314	750161	275482	261313
	C4ZUJ5 [578-594]	LHFGSYHDVDSSELAFK		0	3	651.311	47.097	24	195.2	132.1	50	22.7	6.56588e+06	8.01376e+06	5.4567e+06	4.41381e+06	1.8021e+06	1.91621e+06	866637	823745
	C4ZUJ5 [595-602]	LAASIAFK		0	2	410.751	40.3435	5	199.5	123.6	57.6	19.3	5.71605e+06	6.69557e+06	4.23264e+06	3.47389e+06	1.84212e+06	1.73345e+06	572346	625281
	C4ZUJ5 [60-77]	GITITSAATTAFWSGMAK		0	2	907.462	63.4146	9	236.7	83.7	54.4	25.2	1.09097e+06	1.4284e+06	518789	375935	270516	304412	169855	103719
	C4ZUJ5 [60-77]	GITITSAATTAFWSGMAK	1xOxidation [M16]	0	3	610.642	57.7093	8	182.9	126.2	66	24.9	1.91654e+06	1.9619e+06	1.52567e+06	1.17325e+06	641961	762024	294952	236081
	C4ZUJ5 [608-618]	AKPVLLEPIMK		0	2	619.88	44.6684	8	230.6	113.2	43.6	12.6	1.96974e+06	2.28963e+06	1.14301e+06	950831	383724	420025	127792	104616
	C4ZUJ5 [608-618]	AKPVLLEPIMK	1xOxidation [M10]	0	3	418.921	38.6123	7	175.3	135.7	68.6	20.4	2.96605e+06	3.53241e+06	2.75339e+06	2.28106e+06	1.18209e+06	1.35581e+06	295974	478591
	C4ZUJ5 [619-637]	VEVETPEENTGDVIGDLSR		0	2	1030	51.277	15	188.7	121.9	73.2	16.2	3.59889e+06	4.27146e+06	2.76936e+06	2.31805e+06	1.69952e+06	1.3605e+06	381799	298470
	C4ZUJ5 [644-653]	GQESEVTGVK		0	2	517.261	24.9176	1	94.3	201.7	78.3	25.7	1818482	2.86868e+06	5.35244e+06	4.4651e+06	1.90932e+06	1.88768e+06	572989	674778
	C4ZUJ5 [654-671]	IHAEVPLSEMFGYATQLR		0	3	688.02	62.7907	10	246.3	89.7	43.8	20.1	4.81775e+06	5.14105e+06	2.08657e+06	1.57542e+06	823628	953304	448994	369110
	C4ZUJ5 [654-671]	IHAEVPLSEMFGYATQLR	1xOxidation [M10]	0	3	693.351	51.5842	9	173.2	140.1	61.4	25.3	1.97113e+06	2.40212e+06	1.89576e+06	1634870	750376	793617	329329	307334
	C4ZUJ5 [678-686]	ASYTMEFLK		0	2	545.268	49.6092	4	208.7	112.7	57.4	21.2	1.98217e+06	2.17958e+06	1.23865e+06	1.01766e+06	552414	591530	200324	222550
	C4ZUJ5 [678-686]	ASYTMEFLK	1xOxidation [M5]	0	2	553.265	43.2118	4	185.6	134.9	59.9	19.6	3.69921e+06	3.90624e+06	3.09282e+06	2466149	1.25089e+06	1.20431e+06	392221	408957
	C4ZUJ5 [687-702]	YDEAPSNVAQAVIEAR		0	2	866.929	51.3891	13	199.5	115.7	63.5	21.2	6.51646e+06	7530129	4.5351e+06	3.64087e+06	1.99902e+06	2.48565e+06	771040	719463
	C4ZUJ5 [84-101]	INIIDTPGHVDFTIEVER		0	3	690.028	55.7653	14	186.4	111	63.7	38.9	4.9265e+06	5.94983e+06	4.32888e+06	2398850	1.47748e+06	2.31705e+06	1.16266e+06	1.09981e+06
FALSE	P0AG67	Small ribosomal subunit protein bS1 [OS=Escherichia coli K-12]	65	36	36	61.1	4.98	264	31.2	171.2	102.6	95	1.23499e+07	1.32466e+07	7.81504e+07	6.3092e+07	4.01315e+07	4.41475e+07	3.88339e+07	3.91343e+07
	Positions in Master Proteins	Sequence	Modifications	# Missed Cleavages	PSM Charge (by Search Engine): Sequest HT	PSM m/z [Da] (by Search Engine): Sequest HT	PSM RT [min] (by Search Engine): Sequest HT	# PSMs	Abundances (Grouped): 1	Abundances (Grouped): 2	Abundances (Grouped): 3	Abundances (Grouped): 4	Abundance: F5: Sample, 1	Abundance: F6: Sample, 1	Abundance: F7: Sample, 2	Abundance: F8: Sample, 2	Abundance: F9: Sample, 3	Abundance: F10: Sample, 3	Abundance: F11: Sample, 4	Abundance: F12: Sample, 4
	P0AG67 [1-14]	MTESFAQLFEESLK		0	2	830.401	67.8855	5	23.3	157.4	109.1	110.3	31259.8	33798.4	244697	196956	152855	151514	160302	147637
	P0AG67 [1-14]	MTESFAQLFEESLK	1xOxidation [M1]	0	2	838.398	66.7639	6	14.5	178.2	113.1	94.2	34219.1	47498.4	568806	429594	304471	323163	262454	260095
	P0AG67 [101-115]	AYEDAETVTGVINGK		0	2	783.885	44.1159	9	25.8	172	115.3	87	345474	378127	2.57721e+06	2.2495e+06	1.59273e+06	1.63524e+06	1.15622e+06	1.2821e+06
	P0AG67 [118-128]	GGFTVELNGIR		0	2	581.813	50.2843	9	26.7	146.9	125.1	101.3	521686	515624	3.14747e+06	2588281	2.26586e+06	2.60968e+06	1.96567e+06	1.97195e+06
	P0AG67 [129-142]	AFLPGSLVDVRPVR		0	3	509.3	52.4081	12	31.4	169.6	105.7	93.3	599852	752131	3.91288e+06	3.36888e+06	2.11649e+06	2.4214e+06	1.94682e+06	2.05202e+06
	P0AG67 [15-25]	EIETRPGSIVR		0	3	419.57	30.6699	8	31	195.5	99.7	73.8	234567	308985	1873443	1539566	858166	875004	572420	718883
	P0AG67 [164-170]	NNVVVSR		0	2	394.225	22.616	5	9.9	199.2	111	79.9	61400.4	88574.8	1.58969e+06	1.37905e+06	839134	810844	541198	650990
	P0AG67 [171-196]	RAVIESENSAERDQLLENLQEGMEVK		2	4	747.623	53.3606	2	35.9	124.7	101.3	138.1	113987	131658	484055	374401	322787	370450	471037	472083
	P0AG67 [171-196]	RAVIESENSAERDQLLENLQEGMEVK	1xOxidation [M23]	2	4	751.622	47.0858	5	32.5	165	97.8	104.7	152316	178793	913821	767580	465028	529932	515079	548356
	P0AG67 [172-182]	AVIESENSAER		0	2	602.793	25.6115	4	10.6	231.1	93.8	64.4	28499.2	52903.2	987402	722376	332914	352734	212871	260515
	P0AG67 [183-196]	DQLLENLQEGMEVK		0	2	823.41	56.6483	4	25.9	183.6	112.3	78.2	45718.1	50479.2	382409	303118	211566	204982	160632	131111
	P0AG67 [183-196]	DQLLENLQEGMEVK	1xOxidation [M11]	0	2	831.406	47.964	5	24	197.4	99.6	79	56581.7	54545.2	483815	429852	227881	232416	188988	176287
	P0AG67 [2-14]	TESFAQLFEESLK		0	2	764.88	67.2026	6	54.8	155.4	104.2	85.7	332620	417272	1309454	853235	710332	707021	585600	579973
	P0AG67 [228-244]	VKHPSEIVNVGDEITVK		1	3	622.012	40.5512	10	17.9	200.1	87.2	94.8	405600	452331	5.35063e+06	4.28479e+06	2.15259e+06	2023139	2.18343e+06	2.35635e+06
	P0AG67 [230-244]	HPSEIVNVGDEITVK		0	3	546.289	42.948	13	26.3	182.4	106.1	85.2	322345	368498	2.55664e+06	2.23587e+06	1.43131e+06	1351369	1093239	1.13971e+06
	P0AG67 [26-43]	GVVVAIDKDVVLVDAGLK		1	3	604.028	57.7774	16	25.2	78.2	94.3	202.3	347502	470013	1.57043e+06	1.00413e+06	1.12605e+06	2.03595e+06	3.88649e+06	2.71339e+06
	P0AG67 [261-272]	QLGEDPWVAIAK		0	2	663.855	52.798	6	30.9	156.6	115.6	96.9	478209	484611	2.88159e+06	2.06258e+06	1.61132e+06	2.01103e+06	1.44329e+06	1.57887e+06
	P0AG67 [321-339]	VVNVGDVVEVMVLDIDEER		0	2	1065.05	80.8359	14	49	164	87.9	99.1	366364	416125	1.45321e+06	1.17737e+06	712893	689634	882655	707482
	P0AG67 [321-339]	VVNVGDVVEVMVLDIDEER	1xOxidation [M11]	0	3	715.697	64.9489	4	45.9	130.6	112.8	110.7	96321.9	97601.3	300712	252895	233758	242452	226904	240822
	P0AG67 [34-43]	DVVLVDAGLK		0	2	514.804	46.07	4	22.9	193.1	84			61296.2	562588	474863	250160	201864
	P0AG67 [342-347]	ISLGLK		0	2	315.713	38.4941	5	34.1	187.8	97.4	80.7	231094	308954	1559565	1.39254e+06	775448	752679	605305	662934
	P0AG67 [351-363]	ANPWQQFAETHNK		0	3	524.252	45.1647	2	38.9	175.5	103.3	82.2	344615	380894	1.89533e+06	1.40694e+06	997639	926665	712242	822250
	P0AG67 [411-426]	KGDEIAAVVLQVDAER		1	3	571.645	52.6902	13	24.4	163.1	116.3	96.3	542950	604893	4.05061e+06	3.63354e+06	2.47403e+06	3.02261e+06	2.24451e+06	2.28341e+06
	P0AG67 [411-428]	KGDEIAAVVLQVDAERER		2	3	666.69	50.1988	5	22.5	107.9	94.8	174.9	154990	185130	929788	712575	698942	731653	1.32844e+06	1.30969e+06
	P0AG67 [412-426]	GDEIAAVVLQVDAER		0	2	792.915	58.2459	8	33.2	167.7	102	97.2	100625	125259	621215	517470	295217	402991	325656	331519
	P0AG67 [412-428]	GDEIAAVVLQVDAERER		1	3	623.994	54.7864	2	32.6	152.9	87.8	126.7	37533.4	30317	169452	147769	78635.3	105093	131620	130560
	P0AG67 [435-449]	QLAEDPFNNWVALNK		0	2	879.944	59.9095	8	39.1	157.7	108.9	94.3	226105	268912	1.15604e+06	855588	636762	740823	597922	591886
	P0AG67 [44-54]	SESAIPAEQFK		0	2	603.803	37.5534	5	33.8	181	105.6	79.5	1.39882e+06	1.5191e+06	8807768	6909068	4.40183e+06	4.70829e+06	3.26741e+06	3.59355e+06
	P0AG67 [451-457]	GAIVTGK		0	2	323.199	21.1921	2	5.6	224.1	103.5	66.8	9050.81	16912.1	525592	468215	253620	206927	134617	162265
	P0AG67 [458-464]	VTAVDAK		0	2	352.203	19.9906	6	6.5	203.3	109.2	81	45952.5	63103.7	1742511	1.63582e+06	902585	910515	598632	755553
	P0AG67 [465-479]	GATVELADGVEGYLR		0	2	775.396	54.8946	10	32.9	167.2	105.9	94.1	1.12794e+06	1.20679e+06	6.26346e+06	5.62684e+06	3.48772e+06	4.05207e+06	3.35099e+06	3.32866e+06
	P0AG67 [486-504]	DRVEDATLVLSVGDEVEAK		1	2	1023.02	53.4821	14	44.2	134.7	97.1	124	951378	817630	2.90471e+06	2.48513e+06	1.61441e+06	2.32389e+06	2.44057e+06	2.50425e+06
	P0AG67 [505-510]	FTGVDR		0	2	347.68	25.2456	4	12.8	239.1	88.9	59.1	75903.8	138353	2.22846e+06	1.6348e+06	751050	670995	436513	510674
	P0AG67 [514-520]	AISLSVR		0	2	373.232	36.7537	8	32.2	186.8	98.1	82.9	492874	549787	3.49468e+06	2.60286e+06	1.61166e+06	1.55659e+06	1.39785e+06	1283050
	P0AG67 [521-536]	AKDEADEKDAIATVNK		2	3	573.292	28.0656	5	48.9	78	150.2	122.9	459732	459369	798664	671566	1.37575e+06	1.44805e+06	1.09097e+06	1.22145e+06
	P0AG67 [523-536]	DEADEKDAIATVNK		1	3	506.914	32.0216	5	8.3	305.3	62.2	24.2	36866.1	28461.8	1.354e+06	1.05044e+06	237859	248307	91294.5	98113.3
	P0AG67 [529-536]	DAIATVNK		0	2	416.231	25.5704	1	3.7	319.3	52.7	24.3	18103	37611.7	2.47467e+06	2.02201e+06	379461	358806	151916	189956
	P0AG67 [537-552]	QEDANFSNNAMAEAFK		0	2	893.891	49.3479	5	25.2	207.6	99.4	67.8	84255.1	109259	871060	719733	379097	379012	269045	248779
	P0AG67 [55-86]	NAQGELEIQVGDEVDVALDAVEDGFGETLLSR		0	3	1130.22	88.9116	8	218.6	129.2	22.9	29.3	1.24592e+06	797831	919439	377696	148172	73585.7	187033	95171.3
	P0AG67 [91-100]	RHEAWITLEK		1	3	428.236	37.3501	1	22.3	193.9	76.7	107	190671	237133	2232446	1526571	713337	748097	1.01603e+06	1.02197e+06
FALSE	C4ZRR2	Elongation factor Ts [OS=Escherichia coli BW2952]	78	25	25	30.4	5.29	203	264.1	83.6	38.3	14	2.75164e+08	3.23117e+08	1.05468e+08	8.44e+07	4.29261e+07	4.34844e+07	1.51087e+07	1.6566e+07
	Positions in Master Proteins	Sequence	Modifications	# Missed Cleavages	PSM Charge (by Search Engine): Sequest HT	PSM m/z [Da] (by Search Engine): Sequest HT	PSM RT [min] (by Search Engine): Sequest HT	# PSMs	Abundances (Grouped): 1	Abundances (Grouped): 2	Abundances (Grouped): 3	Abundances (Grouped): 4	Abundance: F5: Sample, 1	Abundance: F6: Sample, 1	Abundance: F7: Sample, 2	Abundance: F8: Sample, 2	Abundance: F9: Sample, 3	Abundance: F10: Sample, 3	Abundance: F11: Sample, 4	Abundance: F12: Sample, 4
	C4ZRR2 [105-112]	ITDVEVLK		0	2	458.771	38.1299	3	263.3	84.4	38.9	13.4	21122636	27087622	8671390	6.77559e+06	3.50492e+06	3.56861e+06	1155832	1.27825e+06
	C4ZRR2 [126-133]	IGENINIR		0	2	464.763	36.1895	6	275	76.1	35.6	13.3	32445198	36936040	11291464	8121852	4.36733e+06	4.58564e+06	1.6197e+06	1736579
	C4ZRR2 [134-151]	RVAALEGDVLGSYQHGAR		1	3	633.664	41.5929	5	319.9	41.9	15.1	23.1	971730	1.04294e+06	130060	133358	41472.4	54287.2		72745
	C4ZRR2 [135-151]	VAALEGDVLGSYQHGAR		0	2	871.945	44.4918	16	277.1	69.7	38.5	14.7	4.02364e+07	45707841	1.18987e+07	9.77218e+06	5.78966e+06	6.14285e+06	2.14081e+06	2.42154e+06
	C4ZRR2 [152-159]	IGVLVAAK		0	2	385.76	35.7369	5	277.6	74.6	35.3	12.5	1.99969e+07	2.18924e+07	6.08267e+06	5.20538e+06	2.822e+06	2.50776e+06	917135	967509
	C4ZRR2 [16-24]	TGAGMMDCK	1xOxidation [M]; 1xCarbamidomethyl [C8]	0	2	493.691	20.3891	7	98.9	197.2	84.7	19.3	259292	363928	701461	534729	251194	275276	53052.3	67407.7
	C4ZRR2 [16-25]	TGAGMMDCKK	1xCarbamidomethyl [C8]	1	3	366.83	21.8847	2	277.3	65	44.3	13.4	234774	482408	92086.2	67486.7	61442.8	47037	9536.54	27852.9
	C4ZRR2 [160-167]	GADEELVK		0	2	430.721	27.9707	4	227.6	108.5	46.8	17.2	8.28064e+06	12970592	5.54566e+06	4399006	2.14667e+06	2.11497e+06	718587	849774
	C4ZRR2 [168-193]	HIAMHVAASKPEFIKPEDVSAEVVEK		0	4	716.129	42.6329	3	197.4	131.7	49.2	21.7	1298822	1.57765e+06	1.11358e+06	819441	375425	339008	163005	152228
	C4ZRR2 [168-193]	HIAMHVAASKPEFIKPEDVSAEVVEK	1xOxidation [M4]	0	4	720.126	40.1556	3	87.6	235.5	46.1	30.9	803383	873404	2.42955e+06	2088154	464714	418508	286883	303641
	C4ZRR2 [194-209]	EYQVQLDIAMQSGKPK		0	3	612.317	45.749	6	286.3	71.3	31.5	10.9	6.16574e+06	7.15569e+06	1.96477e+06	1.39296e+06	759515	705356	279319	229349
	C4ZRR2 [194-209]	EYQVQLDIAMQSGKPK	1xOxidation [M10]	0	3	617.648	41.6858	10	208.9	133.7	43.2	14.2	5.02816e+06	6.05466e+06	4.21695e+06	2.95448e+06	1.02694e+06	1.26894e+06	358214	392749
	C4ZRR2 [2-10]	AEITASLVK		0	2	466.276	37.8234	5	266.8	82.4	36.4	14.3	1.26712e+06	1.41881e+06	447724	383012	195941	171109	72709.3	71156.2
	C4ZRR2 [222-240]	KFTGEVSLTGQPFVMEPSK		1	3	694.691	50.6656	2	299	50.9	38	12.1	1.24215e+06	1.70659e+06	287518	213464	172840	198217	55221.8	63157.7
	C4ZRR2 [222-240]	KFTGEVSLTGQPFVMEPSK	1xOxidation [M15]	1	3	700.022	47.2319	5	274.6	76	34.5	14.9	3193938	3.59189e+06	1.03126e+06	853336	410145	440464	176704	191670
	C4ZRR2 [223-240]	FTGEVSLTGQPFVMEPSK		0	2	977.49	54.7908	4	292.2	62.6	32.4	12.8	1.21604e+06	1481360	317286	260472	131496	168727	59074.9	58623.3
	C4ZRR2 [223-240]	FTGEVSLTGQPFVMEPSK	1xOxidation [M14]	0	2	985.482	51.3926	6	267.5	76.6	39.1	16.8	2.78932e+06	3.15528e+06	949924	759850	433964	432854	183350	188905
	C4ZRR2 [241-247]	TVGQLLK		0	2	379.742	34.3557	7	271.6	82.4	34.3	11.7	11462927	12483069	3.95054e+06	3.33147e+06	1.5329e+06	1.48438e+06	469449	569724
	C4ZRR2 [248-258]	EHNAEVTGFIR		0	2	636.82	37.0722	16	270.4	73.2	40.6	15.8	1.71215e+07	20215157	5.60348e+06	4.51994e+06	2.64341e+06	2.95732e+06	1.03813e+06	1.13409e+06
	C4ZRR2 [25-42]	KALTEANGDIELAIENMR		1	3	663.342	55.0497	6	304.7	49.8	30.5	15	1.45256e+06	1.82778e+06	282273	251544	146289	181869	87595.6	73430.1
	C4ZRR2 [25-42]	KALTEANGDIELAIENMR	1xOxidation [M17]	1	3	668.675	46.6111	4	241.6	92.7	49	16.7	1.78269e+06	1.28157e+06	655759	512931	283047	331679	83673.8	130699
	C4ZRR2 [259-267]	FEVGEGIEK		0	2	504.256	38.5182	8	240.5	106	41.5	12.1	16458155	19762668	8840019	7.15019e+06	3.08826e+06	3132937	866036	946685
	C4ZRR2 [259-281]	FEVGEGIEKVETDFAAEVAAMSK		1	3	819.731	73.6942	3	275.4		11.8	12.8	2.57731e+06	3.31714e+06			105386	149923	142050	129495
	C4ZRR2 [259-281]	FEVGEGIEKVETDFAAEVAAMSK	1xOxidation [M21]	1	3	825.065	67.2037	3	343.9	6.9	23.8	25.4	2.79539e+06	3.51976e+06	134277	29182.7	198325	238264	230303	233274
	C4ZRR2 [26-42]	ALTEANGDIELAIENMR		0	2	930.462	60.341	11	274.2	74.3	37.3	14.2	3156923	3.56006e+06	1.06942e+06	771117	421525	494630	165240	181980
	C4ZRR2 [26-42]	ALTEANGDIELAIENMR	1xOxidation [M16]	0	2	938.459	51.4335	8	247.3	99.3	34.7	18.7	1.96866e+06	2.34223e+06	937955	792337	397404	228516	173845	151213
	C4ZRR2 [26-43]	ALTEANGDIELAIENMRK		1	3	663.343	56.0857	2	250.8		26.9	22.3	254811	263329			25186.7	30623.4	23025.9
	C4ZRR2 [268-281]	VETDFAAEVAAMSK		0	2	734.854	55.3612	7	248.7	97.5	40.9	12.9	5.80596e+06	6.28345e+06	2.60417e+06	2.15583e+06	923902	1.06923e+06	328797	297984
	C4ZRR2 [268-281]	VETDFAAEVAAMSK	1xOxidation [M12]	0	2	742.85	45.8436	13	253.6	90.7	41.6	14.1	7.6871e+06	9.26701e+06	3422736	2.66031e+06	1.41646e+06	1.3559e+06	483438	452251
	C4ZRR2 [52-63]	KAGNVAADGVIK		1	3	381.556	26.643	9	329.6	21.3	33.7	15.4	7.26719e+06	8338097	532128	476079	783391	809072	331646	397926
	C4ZRR2 [53-63]	AGNVAADGVIK		0	2	507.783	30.9112	6	241	107.1	39.9	12	12140477	14187845	6.44395e+06	5276646	2.23315e+06	2.11245e+06	606076	707132
	C4ZRR2 [86-95]	DAGFQAFADK		0	2	535.252	42.899	2	265.8	82.1	38.4	13.7	20751688	23193332	7358928	6246971	3.29319e+06	3052539	1.08985e+06	1.17578e+06
	C4ZRR2 [96-104]	VLDAAVAGK		0	2	422.251	28.9345	6	263.2	88.3	36.3	12.2	15928164	19775328	6460448	5490675	2.47861e+06	2415398	740443	911171
FALSE	B1XBY6	Large ribosomal subunit protein uL1 [OS=Escherichia coli str. K-12 substr. DH10B]	61	15	15	24.7	9.64	186	53	130.2	92	124.7	3.0311e+07	3.42702e+07	8.99695e+07	6.97486e+07	5.45308e+07	5.74487e+07	7.37965e+07	7.79842e+07
	Positions in Master Proteins	Sequence	Modifications	# Missed Cleavages	PSM Charge (by Search Engine): Sequest HT	PSM m/z [Da] (by Search Engine): Sequest HT	PSM RT [min] (by Search Engine): Sequest HT	# PSMs	Abundances (Grouped): 1	Abundances (Grouped): 2	Abundances (Grouped): 3	Abundances (Grouped): 4	Abundance: F5: Sample, 1	Abundance: F6: Sample, 1	Abundance: F7: Sample, 2	Abundance: F8: Sample, 2	Abundance: F9: Sample, 3	Abundance: F10: Sample, 3	Abundance: F11: Sample, 4	Abundance: F12: Sample, 4
	B1XBY6 [106-122]	KGEMNFDVVIASPDAMR		1	3	627.306	51.8914	13	72.1	69.7	126.6	131.6	525300	643589	640939	492876	931544	1.12048e+06	1.10198e+06	1.02313e+06
	B1XBY6 [106-122]	KGEMNFDVVIASPDAMR	1xOxidation [M]	1	3	632.638	46.9389	17	47.2	121.2	92	139.5	650734	818110	2.07038e+06	1.6969e+06	1.35304e+06	1.49561e+06	2.12573e+06	2.18867e+06
	B1XBY6 [106-122]	KGEMNFDVVIASPDAMR	2xOxidation [M4; M16]	1	3	637.97	42.6574	7	35.8	135.8	87.4	141.1	853218	997663	3939447	3116298	2.23392e+06	2.27517e+06	3.50199e+06	3.78342e+06
	B1XBY6 [107-122]	GEMNFDVVIASPDAMR	2xOxidation [M3; M15]	0	2	892.4	47.389	6
	B1XBY6 [123-134]	VVGQLGQVLGPR		0	2	611.868	44.971	8	46.9	136.3	89.6	127.2	5937032	6.40206e+06	19291188	16679438	11792030	11798416	16068687	17432738
	B1XBY6 [13-19]	EKVDATK		1	2	395.719	16.8927	1	12.6		121	166.3	9422.49	15749.5			119771	113739	180754	142337
	B1XBY6 [135-141]	GLMPNPK		0	2	378.707	31.0212	7	55	148.7	90.7	105.6	256899	301434	868835	650962	435662	482678	481719	592499
	B1XBY6 [135-141]	GLMPNPK	1xOxidation [M3]	0	2	386.705	22.0287	1	17.9	162	98.3	121.8	93123.4	138300	1.13191e+06	931178	643105	603816	696741	855336
	B1XBY6 [142-154]	VGTVTPNVAEAVK		0	2	642.862	38.0226	7	51.5	116.8	98.2	133.4	6.11189e+06	7.20194e+06	17203694	13143479	12072053	13226486	16597785	17771276
	B1XBY6 [168-177]	NGIIHTTIGK		0	3	351.873	31.0448	4	41.6	189.4	87.3	81.7	307042	387536	1.77674e+06	1.38496e+06	833064	627199	592211	773847
	B1XBY6 [20-31]	QYDINEAIALLK		0	2	695.883	62.3669	7	42.9	148.9	98.6	109.6	1.30437e+06	1.42887e+06	5542163	4058330	2.98011e+06	3.31129e+06	3.51133e+06	3.47408e+06
	B1XBY6 [20-37]	QYDINEAIALLKELATAK		1	3	668.705	75.9043	1	78.2	116.1	83.1	122.6	365518	392118	772602	408367	403561	401124	633351	555612
	B1XBY6 [32-37]	ELATAK		0	2	316.684	18.9478	6	9.8	208.4	117.3	64.5	24488.1	34553.9	522271	739312	395570	309342	198752	186194
	B1XBY6 [38-53]	FVESVDVAVNLGIDAR		0	2	852.452	57.6274	47	197.9	65.8	62.8	73.4	3.57809e+06	3.5641e+06	1.36672e+06	1.03176e+06	909693	1.4125e+06	1.46793e+06	1.19624e+06
	B1XBY6 [61-71]	GATVLPHGTGR		0	2	533.294	25.8658	14	51.7	157.2	86.5	104.6	1.61774e+06	1895237	6.17013e+06	4.59626e+06	3.0606e+06	2.80563e+06	3.29529e+06	3.80786e+06
	B1XBY6 [75-88]	VAVFTQGANAEAAK		0	2	688.862	35.2154	7	53.9	137.1	87.6	121.3	5586566	6308452	18228052	12481945	9557045	9732393	12897812	13826133
	B1XBY6 [89-105]	AAGAELVGMEDLADQIK		0	2	865.935	59.0556	10	47.5	117.5	97.7	137.3	2.01544e+06	2.45884e+06	6.3896e+06	4.73595e+06	4.19139e+06	4.99004e+06	6.51982e+06	6.34079e+06
	B1XBY6 [89-105]	AAGAELVGMEDLADQIK	1xOxidation [M9]	0	2	873.935	47.8911	14	39.1	140.5	90.8	129.6	696876	804021	2.80784e+06	2.58153e+06	1.73132e+06	1.74864e+06	2.47688e+06	2.4913e+06
	B1XBY6 [89-106]	AAGAELVGMEDLADQIKK		1	3	620.324	54.653	5	47.3	111	91.5	150.2	377242	369176	977834	785177	666537	783452	1.15323e+06	1.21971e+06
	B1XBY6 [89-106]	AAGAELVGMEDLADQIKK	1xOxidation [M9]	1	3	625.656	43.6923	4	49.1	113.6	97.7	139.6		108470	269170	233832	220793	210699	294465	323061
FALSE	P0A6P5	GTPase Der [OS=Escherichia coli K-12]	69	32	32	55	5.85	167	0.1	343	0.5	56.3	33912.2	71677.5	2.24824e+08	1.75794e+08	657001	140829	3.13662e+07	3.39987e+07
	Positions in Master Proteins	Sequence	Modifications	# Missed Cleavages	PSM Charge (by Search Engine): Sequest HT	PSM m/z [Da] (by Search Engine): Sequest HT	PSM RT [min] (by Search Engine): Sequest HT	# PSMs	Abundances (Grouped): 1	Abundances (Grouped): 2	Abundances (Grouped): 3	Abundances (Grouped): 4	Abundance: F5: Sample, 1	Abundance: F6: Sample, 1	Abundance: F7: Sample, 2	Abundance: F8: Sample, 2	Abundance: F9: Sample, 3	Abundance: F10: Sample, 3	Abundance: F11: Sample, 4	Abundance: F12: Sample, 4
	P0A6P5 [1-15]	MVPVVALVGRPNVGK		0	3	512.642	47.7827	2		149.9		50.1			479544	335633			126562	141987
	P0A6P5 [110-119]	EKPTFLVANK		0	3	382.889	33.8688	7		177.9		22.1			1.19901e+07	10211732			1.30615e+06	1.4487e+06
	P0A6P5 [120-149]	TDGLDPDQAVVDFYSLGLGEIYPIAASHGR		0	3	1059.52	75.3225	4		247.2	4.7	48			1.67411e+06	1.20282e+06	43384	16798.7	302388	251504
	P0A6P5 [16-21]	STLFNR		0	2	369.201	33.5147	1	2.4	344.2	1.7	51.7	33912.2	45763.5	6460065	4886838	26294.5	28212.4	786652	904427
	P0A6P5 [205-215]	LAIVGRPNVGK		0	2	562.35	33.1802	10		170.2		29.8			14938962	9092057			1.94705e+06	2.13481e+06
	P0A6P5 [228-238]	VVVYDMPGTTR		0	2	619.317	40.6958	3		167		33			8480283	6556338			1.35702e+06	1.60276e+06
	P0A6P5 [228-238]	VVVYDMPGTTR	1xOxidation [M6]	0	2	627.314	32.6423	8		174.7		25.3			5.83943e+06	4.66521e+06			718059	798310
	P0A6P5 [239-247]	DSIYIPMER		0	2	562.277	47.1109	4		167.3		32.7			2.75934e+06	2.43543e+06			503027	510318
	P0A6P5 [239-247]	DSIYIPMER	1xOxidation [M7]	0	2	570.274	41.1824	8		171.1		28.9			7.73575e+06	5740925			1.1002e+06	1.14946e+06
	P0A6P5 [25-38]	TRDALVADFPGLTR		1	3	511.279	50.4135	3		155.3		44.7			746608	637319			218979	180518
	P0A6P5 [251-261]	EYVLIDTAGVR		0	2	618.336	47.6132	7		257.2	0.4	42.4			15215023	12635399	20296.4		2269242	2.29947e+06
	P0A6P5 [27-38]	DALVADFPGLTR		0	2	637.839	55.7171	5		254.7	0.3	45			11839903	10336366	14479.3		1.92252e+06	1.98479e+06
	P0A6P5 [278-295]	TLQAIEDANVVMLVIDAR		0	2	986.033	73.4913	6		239.2	16	44.7			1.91493e+06	1593624	117115		323436	329736
	P0A6P5 [278-295]	TLQAIEDANVVMLVIDAR	1xOxidation [M12]	0	2	994.03	68.3844	5		221.1	16.9	62			952296	903666	70823.9		243276	278389
	P0A6P5 [296-314]	EGISDQDLSLLGFILNSGR		0	2	1017.53	77.2332	5		249.2	4.5	46.3			1.2336e+06	926979	31470	11740.7	215346	183651
	P0A6P5 [315-322]	SLVIVVNK		0	2	436.284	39.2708	2		185.6		14.4			8740484	6797106			569282	627186
	P0A6P5 [315-331]	SLVIVVNKWDGLSQEVK		1	3	638.695	54.4774	2		59.6		140.4			138540	126813			297770	328046
	P0A6P5 [323-331]	WDGLSQEVK		0	2	531.267	39.5017	3		186.5		13.5			6260079	4.77821e+06			376074	418174
	P0A6P5 [332-341]	EQVKETLDFR		1	2	632.83	37.0641	2		100					621978	454926
	P0A6P5 [342-349]	LGFIDFAR		0	2	469.759	55.7818	4		251.9	0.5	47.6			8643237	7414897	16857.6		1.5793e+06	1449511
	P0A6P5 [350-369]	VHFISALHGSGVGNLFESVR		0	4	532.284	54.3416	8		252.3	3.1	44.6			11406144	9240335	217046	75195.9	1.92453e+06	1.70812e+06
	P0A6P5 [370-377]	EAYDSSTR		0	2	464.704	21.7298	4		179.1		20.9			2858761	2.24743e+06			268565	326463
	P0A6P5 [370-378]	EAYDSSTRR		1	3	362.172	19.8461	2		163.5		36.5			349503	255912			55621.2	80188.4
	P0A6P5 [379-386]	VGTSMLTR	1xOxidation [M5]	0	2	440.732	25.8088	5		174.2		25.8			6.04647e+06	4.99039e+06			732312	902386
	P0A6P5 [387-401]	IMTMAVEDHQPPLVR		0	3	579.633	43.6894	4		157.6		42.4			1.0618e+06	878745			251875	268144
	P0A6P5 [387-401]	IMTMAVEDHQPPLVR	1xOxidation [M4]	0	3	584.964	38.8372	4		168.8		31.2			4.17173e+06	3296246			653732	719394
	P0A6P5 [387-401]	IMTMAVEDHQPPLVR	2xOxidation [M2; M4]	0	3	590.295	35.7242	4		174.1		25.9			8.22241e+06	6.96294e+06			1.06572e+06	1.19303e+06
	P0A6P5 [409-428]	YAHAGGYNPPIVVIHGNQVK		0	4	534.286	39.9898	5		254.2	0.3	45.5			1.48898e+07	1.1231e+07	26517.1	8880.99	2.08617e+06	2.57149e+06
	P0A6P5 [429-436]	DLPDSYKR		1	3	331.838	28.0135	6		168.2		31.8			5.84919e+06	4232991			869048	1.01639e+06
	P0A6P5 [445-454]	SLDVMGSPIR		0	2	537.784	44.6839	1		167.8		32.2			3636417	3.05804e+06			633120	647123
	P0A6P5 [445-454]	SLDVMGSPIR	1xOxidation [M5]	0	2	545.782	37.4697	5		173.7		26.3			11847142	8962870			1.52054e+06	1.59588e+06
	P0A6P5 [45-50]	AEIEGR		0	2	337.677	20.3368	5		178		22			3768082	3258331			380185	493357
	P0A6P5 [459-467]	EGENPYANK		0	2	511.233	23.8729	3	3.9	265.8		30.3		25914	2.13059e+06	1.46385e+06			176228	229687
	P0A6P5 [459-468]	EGENPYANKR		1	3	393.192	22.0362	4		167.1		32.9			2.46399e+06	1.78564e+06			379470	449139
	P0A6P5 [468-477]	RNTLTPTQMR	1xOxidation [M9]	1	3	411.884	22.4185	1		176.4		23.6			142179	107332			12373.4	22088.6
	P0A6P5 [469-477]	NTLTPTQMR		0	2	531.274	31.4182	3		173.1		26.9			4.78365e+06	3.64652e+06			603505	698514
	P0A6P5 [51-70]	EFICIDTGGIDGTEDGVETR	1xCarbamidomethyl [C4]	0	2	1092.49	52.7611	6		252.5	3.8	43.6			5.29099e+06	4.33386e+06	72717.9		790397	865965
	P0A6P5 [93-104]	AGLMPADEAIAK		0	2	593.81	40.588	3		158.7		41.3			5616255	4189747			1.19727e+06	1333252
	P0A6P5 [93-104]	AGLMPADEAIAK	1xOxidation [M4]	0	2	601.807	35.1436	3		174.2		25.8			13624938	9919679			1.60325e+06	1.8563e+06
FALSE	B1XCM5	Alanine--tRNA ligase [OS=Escherichia coli str. K-12 substr. DH10B]	46	35	35	96	5.81	166	173.9	136.8	58.7	30.6	2.52682e+07	2.9592e+07	2.39609e+07	1.93094e+07	9.19927e+06	9.25476e+06	4.52039e+06	5.11246e+06
	Positions in Master Proteins	Sequence	Modifications	# Missed Cleavages	PSM Charge (by Search Engine): Sequest HT	PSM m/z [Da] (by Search Engine): Sequest HT	PSM RT [min] (by Search Engine): Sequest HT	# PSMs	Abundances (Grouped): 1	Abundances (Grouped): 2	Abundances (Grouped): 3	Abundances (Grouped): 4	Abundance: F5: Sample, 1	Abundance: F6: Sample, 1	Abundance: F7: Sample, 2	Abundance: F8: Sample, 2	Abundance: F9: Sample, 3	Abundance: F10: Sample, 3	Abundance: F11: Sample, 4	Abundance: F12: Sample, 4
	B1XCM5 [244-261]	IAAVLQHVNSNYDIDLFR		0	3	696.701	56.5003	4	151	176.4	53.1	19.5	340594	394893	492456	373123	110532	150525	50167.9	44844.3
	B1XCM5 [351-361]	RQQAQVEQVLK		1	2	663.879	30.1665	3	213.9	115.5	49.1	21.5	594872	702678	391511	311544	148006	148909	58554.5	72024.2
	B1XCM5 [352-361]	QQAQVEQVLK		0	2	585.828	34.5685	2	195.4	130.5	48.8	25.3	428149	462809	331502	266652	107161	115235	52119.9	63651.8
	B1XCM5 [362-369]	TEEEQFAR		0	2	505.233	27.7075	4	123	153.5	86.7	36.8	619833	1.11906e+06	1.13014e+06	955933	777127	443847	150600	412968
	B1XCM5 [374-384]	GLALLDEELAK		0	2	586.332	54.1273	6	181.9	128.8	57.4	31.9	1.60547e+06	1.75821e+06	1.2749e+06	1.11025e+06	474382	592698	296990	292079
	B1XCM5 [385-397]	LSGDTLDGETAFR		0	2	691.333	43.0675	7	189.6	127.3	54.1	29	1.478e+06	1.76229e+06	1.20229e+06	975968	462947	458454	228712	266778
	B1XCM5 [420-433]	VDEAGFEAAMEEQR		0	2	791.347	46.6778	4	178.5	123.7	63	34.8	352353	422684	288863	247497	128976	144064	80816.1	69966.5
	B1XCM5 [460-469]	GYDHLELNGK		0	3	382.525	33.863	4	166.8	150	57.9	25.4	327340	338495	372938	240300	108473	122971	47533.2	54008.1
	B1XCM5 [470-478]	VTALFVDGK		0	2	475.27	41.5233	2	182.2	132.7	56.9	28.2	1.60472e+06	1.81016e+06	1.46854e+06	1.04904e+06	472378	599420	247427	282137
	B1XCM5 [479-513]	AVDAINAGQEAVVVLDQTPFYAESGGQVGDKGELK		1	3	1192.6	63.6794	3	208.5	103	47.5	41	486097	625713	308743	240595	117514	134310	119971	98165.3
	B1XCM5 [49-57]	DVFLGLDKR		1	2	531.801	45.4103	6	171.5	144.9	60.6	23	537774	578234	509786	435433	209109	185408	75828	73496.8
	B1XCM5 [514-526]	GANFSFAVEDTQK		0	2	707.335	45.9426	8	180	136.6	56	27.5	1.27086e+06	1.53504e+06	1.14999e+06	976665	398437	474281	213002	213120
	B1XCM5 [527-536]	YGQAIGHIGK		0	2	522.285	29.3859	6	188.8	127.5	53.6	30.1	460438	537415	376066	299971	146814	136095	72702.2	86371.5
	B1XCM5 [537-543]	LAAGSLK		0	2	330.208	25.7451	1	135.9	174.1	57.6	32.5	228966	346994	401043	325197	120790	118276	60335	75214.6
	B1XCM5 [544-556]	VGDAVQADVDEAR		0	2	672.823	34.0943	6	168.3	146.5	56.8	28.4	687998	774497	702739	574106	251419	241142	114521	132412
	B1XCM5 [544-557]	VGDAVQADVDEARR		1	3	500.919	32.749	6	188.6	127.2	53.7	30.5	800583	928797	629760	536999	244895	246621	125672	155015
	B1XCM5 [576-585]	QVLGTHVSQK		0	3	366.208	23.3763	4	157.1	158.7	56.2	28	429055	588346	526328	489830	186540	172992	81665	98365.8
	B1XCM5 [586-592]	GSLVNDK		0	2	366.698	22.3515	2	78.7	201.2	83.6	36.6	84961.6	114395	260804	243646	107553	101957	41414.6	50738.1
	B1XCM5 [596-610]	FDFSHNEAMKPEEIR	1xOxidation [M9]	0	3	622.618	37.1341	8	192.8	134.5	55	17.7	1.13322e+06	1.39936e+06	1.07831e+06	716234	418246	308013		115657
	B1XCM5 [611-621]	AVEDLVNTQIR		0	2	629.345	43.3454	8	179.8	136.4	53.8	30.1	1.68563e+06	1.80751e+06	1.52811e+06	1.14699e+06	527758	516453	287962	296078
	B1XCM5 [640-648]	GAMALFGEK	1xOxidation [M3]	0	2	470.234	36.9582	4	148.5	108.3	43.2		531414	537107	439792	345041	144021	168104
	B1XCM5 [674-681]	TGDIGLFR		0	2	439.74	44.2972	5	194.3	109.4	57.9	38.5	1.06664e+06	1.28947e+06	734973	593111	328053	371826	246072	219355
	B1XCM5 [682-693]	IISESGTAAGVR		0	2	580.816	29.8604	5	171.7	138.8	56.1	33.3	1.71385e+06	2.02052e+06	1.65086e+06	1.37091e+06	624655	592761	321731	405511
	B1XCM5 [694-713]	RIEAVTGEGAIATVHADSDR		1	3	690.019	38.1433	7	150.9	143.6	66.9	38.6	609959	684551	712664	530307	283520	289128	151215	180395
	B1XCM5 [695-713]	IEAVTGEGAIATVHADSDR		0	3	637.986	40.5811	4	140.8	150.6	69	39.5	226547	258203	286401	233521	99586	141098	67911.4
	B1XCM5 [714-722]	LSEVAHLLK		0	3	337.206	38.4139	5	170.1	146.6	55.1	28.1	928179	1.03275e+06	897538	793519	320794	313409	162678	161200
	B1XCM5 [723-731]	GDSNNLADK		0	2	467.217	20.1695	2	36.9	236.4	92.1	34.6	45359.3	58759.6	348871	313483	123507	134356	40226.4	58185.3
	B1XCM5 [75-86]	HNDLENVGYTAR		0	2	694.832	33.2076	5	189	128.8	57.8	24.4	815028	894182	709563	476983	251938	270794	104116	116431
	B1XCM5 [751-764]	EQAAAQESANLSSK		0	2	717.346	26.3869	5	135.2	163.3	61.5	40	385358	620814	655350	532997	230257	214729	136879	153389
	B1XCM5 [773-784]	LLVSELSGVEPK		0	2	635.867	49.3909	8	164.9	135.5	61	38.7	1.03538e+06	1.00082e+06	904085	773650	375188	377500	234271	243342
	B1XCM5 [788-811]	TMVDDLKNQLGSTIIVLATVVEGK		1	3	848.804	85.5643	1	226.1	66.7	52.5	54.8	164310	210550	62528.3	48081.5	39291.8	47407	52269.5	38824.4
	B1XCM5 [795-811]	NQLGSTIIVLATVVEGK		0	2	871.508	73.908	1	120.8	201	51.2	27	79888	115578	183570	139227	41663.3	39850.9	24820.8	18643.3
	B1XCM5 [812-820]	VSLIAGVSK		0	2	437.274	38.8627	5	166.8	138.7	59.1	35.4	586277	662655	544918	493089	215996	225491	130219	134261
	B1XCM5 [828-842]	AGELIGMVAQQVGGK		0	2	729.394	53.4102	5	172.4	121.7	63.3	42.6	451912	520394	384335	305225	167104	189586	126895	113372
	B1XCM5 [828-842]	AGELIGMVAQQVGGK	1xOxidation [M7]	0	2	737.391	46.579	5	166.2	119	68.9	45.8	370450	436126	313143	264618	159896	173919	114007	107846
	B1XCM5 [843-868]	GGGRPDMAQAGGTDAAALPAALASVK		0	3	785.068	50.1073	3	208.5	96.5	54.6	40.5	454301	498582	235912	205761	121899	127388	90536.6	94308.5
	B1XCM5 [843-868]	GGGRPDMAQAGGTDAAALPAALASVK	1xOxidation [M7]	0	3	790.398	47.4115	2	200.2	121.3	46	32.5	646402	743377	471609	373921	152846	165738	110545	114307
FALSE	B1X6G8	Large ribosomal subunit protein uL2 [OS=Escherichia coli str. K-12 substr. DH10B]	63	17	17	29.8	10.93	158	27.2	210.9	120.2	41.7	1.46919e+07	1.77332e+07	1.40953e+08	1.11569e+08	6.97204e+07	7.32889e+07	2.37935e+07	2.5791e+07
	Positions in Master Proteins	Sequence	Modifications	# Missed Cleavages	PSM Charge (by Search Engine): Sequest HT	PSM m/z [Da] (by Search Engine): Sequest HT	PSM RT [min] (by Search Engine): Sequest HT	# PSMs	Abundances (Grouped): 1	Abundances (Grouped): 2	Abundances (Grouped): 3	Abundances (Grouped): 4	Abundance: F5: Sample, 1	Abundance: F6: Sample, 1	Abundance: F7: Sample, 2	Abundance: F8: Sample, 2	Abundance: F9: Sample, 3	Abundance: F10: Sample, 3	Abundance: F11: Sample, 4	Abundance: F12: Sample, 4
	B1X6G8 [103-108]	YILAPK		0	2	352.721	33.516	4	28.3	218.2	112.6	40.8	535674	667816	4.96332e+06	4.28045e+06	2406146	2.3518e+06	816932	909369
	B1X6G8 [112-133]	AGDQIQSGVDAAIKPGNTLPMR		0	3	747.055	46.2434	6	35.7	190.5	125.9	47.9	725186	863532	4.75512e+06	3.74145e+06	2.68386e+06	2.89785e+06	1.0691e+06	1.05055e+06
	B1X6G8 [112-133]	AGDQIQSGVDAAIKPGNTLPMR	1xOxidation [M21]	0	3	752.386	42.8125	9	27.9	201.9	127.4	42.8	875912	966560	7405627	5963330	4.08961e+06	4299759	1.31561e+06	1510360
	B1X6G8 [134-150]	NIPVGSTVHNVEMKPGK		0	3	602.989	34.0438	7	34.3	209.6	115.7	40.3	633198	777404	4.86048e+06	3.777e+06	2.41829e+06	2.31237e+06	758111	895497
	B1X6G8 [134-150]	NIPVGSTVHNVEMKPGK	1xOxidation [M13]	0	3	608.32	30.6323	8	25.3	231.3	107.3	36.1	873846	965064	8868384	7929319	3.84858e+06	3933275	1.19949e+06	1426677
	B1X6G8 [157-167]	SAGTYVQIVAR		0	2	582.822	40.6192	11	28.7	186.9	136.6	47.7	2.24332e+06	2.68168e+06	18309202	13903921	11281627	12044451	3.88143e+06	4275147
	B1X6G8 [168-175]	DGAYVTLR		0	2	447.738	36.6308	9	32.3	201.4	121.6	44.6	1.04266e+06	1.12336e+06	8.14303e+06	5.58583e+06	4.0392e+06	4.10472e+06	1.52914e+06	1.45861e+06
	B1X6G8 [184-189]	VEADCR	1xCarbamidomethyl [C5]	0	2	375.165	18.3784	4	4.6	265.1	111.6	18.7		15515.9	779141	1.02626e+06	395519	357897	72799.9	54587.9
	B1X6G8 [19-26]	VVNPELHK		0	2	468.269	24.0059	7	27.3	228.3	105.5	39	462952	784507	5.73142e+06	4437425	2.18108e+06	2.49094e+06	904365	819325
	B1X6G8 [190-203]	ATLGEVGNAEHMLR		0	3	499.921	43.1522	14	34.2	219.4	108.7	37.7	991705	1.12063e+06	7.4985e+06	6.0829e+06	3.40338e+06	3.29244e+06	1.10357e+06	1.21995e+06
	B1X6G8 [190-203]	ATLGEVGNAEHMLR	1xOxidation [M12]	0	3	505.255	37.1047	6	20.1	220.9	122	36.9	525707	654269	7.22135e+06	5.72511e+06	3.49401e+06	3.61118e+06	1.09728e+06	1.05166e+06
	B1X6G8 [215-221]	GVRPTVR		0	2	392.743	20.1929	6	11.6	242.6	117.1	28.7	189663	281571	4929912	4778764	2380720	2.30332e+06	499999	661504
	B1X6G8 [222-238]	GTAMNPVDHPHGGGEGR		0	4	422.942	23.8879	8	35.2	208	114.2	42.6	552023	585098	4.2553e+06	2.64757e+06	1.79316e+06	1.89519e+06	611225	774580
	B1X6G8 [222-238]	GTAMNPVDHPHGGGEGR	1xOxidation [M4]	0	3	568.921	20.6281	8	16.9	223.3	120.4	39.3	282981	457428	5111212	4399103	2.53732e+06	2.57626e+06	727990	958633
	B1X6G8 [243-253]	HPVTPWGVQTK		0	3	417.227	35.2829	10	28.9	231.8	104.6	34.6	628833	688748	6.58307e+06	4.22237e+06	2.3652e+06	2.39452e+06	761492	811955
	B1X6G8 [27-36]	GKPFAPLLEK		0	3	367.222	40.7562	7	29.8	212.5	115.8	41.9	1.49979e+06	1765687	1.28472e+07	1.05171e+07	6.01957e+06	6.6648e+06	2.16948e+06	2.42043e+06
	B1X6G8 [53-59]	HIGGGHK		0	2	353.193	16.1202	2	4.6	228.6	129	37.7	28053.6	41872.8	1.8606e+06	1.57083e+06	904450	1029317	317267	250759
	B1X6G8 [70-80]	NKDGIPAVVER		1	3	399.892	32.8854	12	46.2	113.4	171.5	69	358709	403652	1.05713e+06	824987	1.43084e+06	1.39448e+06	543554	594154
	B1X6G8 [72-80]	DGIPAVVER		0	2	478.264	38.1574	8	18.6	262.7	92.4	26.3	274173	394967	5.39007e+06	3.98871e+06	1.54796e+06	1.71854e+06	445024	484815
	B1X6G8 [81-87]	LEYDPNR		0	2	453.719	28.9015	3	22.4	229.9	110.5	37.2	526771	875357	8.08752e+06	6.00384e+06	3.38117e+06	3314070	1.01195e+06	1.25534e+06
	B1X6G8 [88-97]	SANIALVLYK		0	2	546.327	50.1857	9	26.2	191.7	131.8	50.3	1.44077e+06	1618525	12295203	10162642	7.11869e+06	8.30176e+06	2.95764e+06	2.90705e+06
FALSE	C4ZRR4	Ribosome-recycling factor [OS=Escherichia coli BW2952]	64	15	15	20.6	6.89	145	287.7	62.1	38	12.1	1.40608e+08	1.6996e+08	3.65274e+07	3.0511e+07	2.03336e+07	2.05495e+07	6.39189e+06	6.64479e+06
	Positions in Master Proteins	Sequence	Modifications	# Missed Cleavages	PSM Charge (by Search Engine): Sequest HT	PSM m/z [Da] (by Search Engine): Sequest HT	PSM RT [min] (by Search Engine): Sequest HT	# PSMs	Abundances (Grouped): 1	Abundances (Grouped): 2	Abundances (Grouped): 3	Abundances (Grouped): 4	Abundance: F5: Sample, 1	Abundance: F6: Sample, 1	Abundance: F7: Sample, 2	Abundance: F8: Sample, 2	Abundance: F9: Sample, 3	Abundance: F10: Sample, 3	Abundance: F11: Sample, 4	Abundance: F12: Sample, 4
	C4ZRR4 [100-109]	VPLPPLTEER		0	2	575.827	44.2734	18	295	61.6	34.3	9.1	29120342	32253252	6.9266e+06	5904506	3.62473e+06	3498242	943422	953953
	C4ZRR4 [116-125]	IVRGEAEQAR		1	3	376.875	20.1452	1	279.4	41.1	42.6	36.9	129012	217784	29078.6	20888.1	25638	25518.2	19775.5	24744.9
	C4ZRR4 [145-155]	DKEISEDDDRR		2	3	459.879	20.1798	10	200.7	116.4	67.4	15.5	3.90993e+06	6.45071e+06	3.08293e+06	2.75102e+06	1.66357e+06	1710787	311863	479205
	C4ZRR4 [147-155]	EISEDDDRR		1	3	378.839	20.4004	1	172.2	146.6	63.2	18	115294	178598	117156	127481	49200	56400	13082.8	17250
	C4ZRR4 [163-169]	LTDAAIK		0	2	366.218	25.8895	3	250.1	91.7	45	13.2	5.0621e+06	7.75464e+06	2501992	2.1065e+06	1.16307e+06	1.09416e+06	296245	366414
	C4ZRR4 [163-170]	LTDAAIKK		1	2	430.266	22.2256	1	273.6	66.8	46.1	13.6	2.84689e+06	4749175	949417	847760	619683	618604	184021	181654
	C4ZRR4 [170-185]	KIEAALADKEAELMQF	1xOxidation [M14]	2	3	608.315	49.1569	5	310.2	30.9	40.9	18	7.20898e+06	6.73417e+06	781998	615536	921052	915622	397057	412617
	C4ZRR4 [171-178]	IEAALADK		0	2	415.735	28.2195	4	222.1	126.4	42	9.4	925921	1422067	696847	611717	224109	210459	45303.5	52381.5
	C4ZRR4 [171-185]	IEAALADKEAELMQF		1	2	839.921	58.7477	6	305.3	52.8	31	10.9	4.14709e+06	5051016	868541	721609	426161	505664	160684	166524
	C4ZRR4 [171-185]	IEAALADKEAELMQF	1xOxidation [M13]	1	2	847.919	51.7905	6	270.5	75	40.8	13.7	8.29407e+06	9754655	2.74939e+06	2264787	1.32e+06	1.39488e+06	448299	461145
	C4ZRR4 [32-52]	ASPSLLDGIVVEYYGTPTPLR		0	3	750.066	66.8277	16	325.2	37.9	24.8	12.2	14508768	18631380	2.13919e+06	1.71316e+06	1.21657e+06	1.29359e+06	719856	525803
	C4ZRR4 [53-63]	QLASVTVEDSR		0	2	602.811	33.6795	26	292	59.8	37.1	11.2	2.54751e+07	3.07982e+07	6.2701e+06	5.253e+06	3553189	3.56133e+06	1.00873e+06	1.13485e+06
	C4ZRR4 [67-72]	INVFDR		0	2	382.208	38.6089	8	306	51.1	32.5	10.4	17234290	19506680	3.31342e+06	2832735	1.95935e+06	1.93983e+06	602841	642385
	C4ZRR4 [73-80]	SMSPAVEK		0	2	424.712	24.1507	8	244.7	88.7	49.2	17.4	2.03751e+06	3.41523e+06	1.18449e+06	773007	495635	568319	185311	189291
	C4ZRR4 [73-80]	SMSPAVEK	1xOxidation [M2]	0	2	432.71	20.216	1	158.6	131.4	86	24.1	1387034	1.68052e+06	1.30109e+06	1.22913e+06	864908	791633	210890	254571
	C4ZRR4 [81-109]	AIMASDLGLNPNSAGSDIRVPLPPLTEER		1	3	1011.86	60.3579	3	346	21.4	19.8	12.9	1.3956e+06	1.59553e+06	108237	78470	78264.5	93411.4	54929.2	55954.7
	C4ZRR4 [81-109]	AIMASDLGLNPNSAGSDIRVPLPPLTEER	1xOxidation [M3]	1	3	1017.19	58.6816	5	330.6	28.6	26.2	14.5	2.34632e+06	2.93365e+06	277825	185640	189306	229030	164833	80527.7
	C4ZRR4 [81-99]	AIMASDLGLNPNSAGSDIR		0	2	951.475	49.577	9	304.3	51.7	33.5	10.5	4843718	5.23209e+06	972023	752399	549045	560694	173398	174904
	C4ZRR4 [81-99]	AIMASDLGLNPNSAGSDIR	1xOxidation [M3]	0	2	959.473	46.8233	14	292.8	54.6	39.8	12.8	9.6199e+06	1.1601e+07	2.25707e+06	1.72165e+06	1.39009e+06	1.48129e+06	451345	470620
FALSE	C4ZUF6	Large ribosomal subunit protein uL15 [OS=Escherichia coli BW2952]	73	14	14	15	11.18	131	2.3	283.4	95.8	18.6	1.76745e+06	2.27412e+06	2.80974e+08	2.24221e+08	8.0824e+07	8.90035e+07	1.60325e+07	1.6961e+07
	Positions in Master Proteins	Sequence	Modifications	# Missed Cleavages	PSM Charge (by Search Engine): Sequest HT	PSM m/z [Da] (by Search Engine): Sequest HT	PSM RT [min] (by Search Engine): Sequest HT	# PSMs	Abundances (Grouped): 1	Abundances (Grouped): 2	Abundances (Grouped): 3	Abundances (Grouped): 4	Abundance: F5: Sample, 1	Abundance: F6: Sample, 1	Abundance: F7: Sample, 2	Abundance: F8: Sample, 2	Abundance: F9: Sample, 3	Abundance: F10: Sample, 3	Abundance: F11: Sample, 4	Abundance: F12: Sample, 4
	C4ZUF6 [1-13]	MRLNTLSPAEGSK	1xOxidation [M1]	1	3	473.915	28.3928	2	48.3	196.2	99	56.5	60573.4	72183.3	300274	239942	135941	134916	71180.8	83854.3
	C4ZUF6 [110-123]	VILAGEVTTPVTVR		0	2	727.932	47.1961	16	1.1	300.8	83.4	14.6	201215	238424	6.73529e+07	5.29455e+07	1.46206e+07	1.87671e+07	2.80661e+06	3.00052e+06
	C4ZUF6 [133-141]	AAIEAAGGK		0	2	394.218	21.3021	8	0.3	315.3	73.8	10.7	4820.39	24901.9	12770008	11505202	2.95253e+06	2.7267e+06	366862	458179
	C4ZUF6 [133-144]	AAIEAAGGKIEE		1	2	579.805	33.6798	2	2.2	258.1	115.6	24.2	113640	133896	15918533	13390301	6432466	6.6477e+06	1.25894e+06	1.4849e+06
	C4ZUF6 [22-29]	GIGSGLGK		0	2	344.703	27.5332	2	1.2	296.4	86.7	15.7	23457.6	97237.9	12437577	10668100	3382344	3.35337e+06	549896	676037
	C4ZUF6 [3-13]	LNTLSPAEGSK		0	2	558.799	29.5145	9	2.5	288.3	92.3	16.9	171436	300164	28396842	23919960	8204903	8484525	1.4297e+06	1.63341e+06
	C4ZUF6 [48-59]	RGFEGGQMPLYR		1	3	470.903	40.5044	4	9.1	230.7	128	32.2	23067.3	23820.6	694543	513923	321149	342075	81349.9	85529.6
	C4ZUF6 [48-59]	RGFEGGQMPLYR	1xOxidation [M8]	1	3	476.234	33.7973	5	2.4	267.6	105.3	24.7	15184.4	14215.3	1.9597e+06	1.34072e+06	659299	617383	144084	155384
	C4ZUF6 [49-59]	GFEGGQMPLYR		0	2	627.8	44.9334	8	0.7	279.1	101.4	18.8		19725.2	8734188	6916457	2865834	2781046	512878	535506
	C4ZUF6 [49-59]	GFEGGQMPLYR	1xOxidation [M7]	0	2	635.797	37.8197	15	3.8	280.8	96.8	18.6	197051	259919	19513696	14310764	5.5237e+06	6.00782e+06	1.06473e+06	1.14608e+06
	C4ZUF6 [64-69]	FGFTSR		0	2	357.68	36.1402	10	3.2	277.3	102.4	17.1	183049	202446	18826628	14347394	6.07596e+06	6.06588e+06	964297	1.06094e+06
	C4ZUF6 [70-78]	KAAITAEIR		1	2	486.795	28.0286	10	2.2	182.2	179.9	35.7	58492.5	65132.5	5.4636e+06	4.80419e+06	5.16378e+06	4.95423e+06	931877	1.07797e+06
	C4ZUF6 [71-78]	AAITAEIR		0	2	422.748	33.7253	20	1.9	331.5	57.9	8.6	102777	127480	2.21353e+07	18002840	3.51939e+06	3.45672e+06	479986	564475
	C4ZUF6 [79-84]	LSDLAK		0	1	646.375	23.7377	6		205.2	82.6	12.2			1.60509e+06	1323699	514325	669823	77030.6	97314.5
	C4ZUF6 [85-96]	VEGGVVDLNTLK		0	2	622.348	45.3097	5	1.8	284.2	97.7	16.3	268614	297763	53332744	38695288	15797391	15448024	2536265	2.6619e+06
	C4ZUF6 [97-109]	AANIIGIQIEFAK		0	2	694.401	58.7676	19	7.2	221.9	122.6	48.3	344075	396808	1.15325e+07	1.12971e+07	4.6544e+06	8.54617e+06	2.75681e+06	2.23902e+06
FALSE	P0A6Y8	Chaperone protein DnaK [OS=Escherichia coli K-12]	60	33	33	69.1	4.97	131	108.4	195	73.3	23.3	1.15978e+07	1.39921e+07	2.50026e+07	2.10094e+07	8.55882e+06	8.67628e+06	2.69216e+06	2.79034e+06
	Positions in Master Proteins	Sequence	Modifications	# Missed Cleavages	PSM Charge (by Search Engine): Sequest HT	PSM m/z [Da] (by Search Engine): Sequest HT	PSM RT [min] (by Search Engine): Sequest HT	# PSMs	Abundances (Grouped): 1	Abundances (Grouped): 2	Abundances (Grouped): 3	Abundances (Grouped): 4	Abundance: F5: Sample, 1	Abundance: F6: Sample, 1	Abundance: F7: Sample, 2	Abundance: F8: Sample, 2	Abundance: F9: Sample, 3	Abundance: F10: Sample, 3	Abundance: F11: Sample, 4	Abundance: F12: Sample, 4
	P0A6Y8 [110-121]	MAPPQISAEVLK	1xOxidation [M1]	0	2	650.354	43.172	1	88.9	202.2	83.4	25.4	79285.1	85561.3		187363	77705.2	76896.1	23084.9	24081.3
	P0A6Y8 [160-166]	IAGLEVK		0	2	365.229	34.9878	4	112.2	196.5	68.9	22.5	281819	260456	552969	407183	165012	167585	51823.4	56714.1
	P0A6Y8 [167-183]	RIINEPTAAALAYGLDK		1	3	606.006	49.8056	2	92.6	199.8	85	22.6	92107.4	94034.5	216829	186069	82141.7	88976.8	26114.4	19711.6
	P0A6Y8 [168-183]	IINEPTAAALAYGLDK		0	2	830.448	54.0302	6	108.5	201	69.6	21	285064	302871	632924	468520	169638	209299	61534.3	52435.1
	P0A6Y8 [215-235]	TFEVLATNGDTHLGGEDFDSR		0	3	761.019	49.4942	4	74.4	225.1	81.9	18.6	97569.8	128663	362205	317310	119955	126792	28968	27138.3
	P0A6Y8 [236-245]	LINYLVEEFK		0	2	634.35	58.3738	4	130.7	179.8	68.9	20.6	288690	361558	474457	416606	157084	184639	55740.7	46625.2
	P0A6Y8 [236-246]	LINYLVEEFKK		1	3	465.934	52.2164	3	135	170.9	68.3	25.9	400459	483160	645476	480426	223486	221842	80913.3	87945.8
	P0A6Y8 [246-253]	KDQGIDLR		1	2	472.762	27.3047	2	108.6	208.7	67.3	15.5	99983.2	115021	227882	186468	64559	68393.5	15349.3	15264.4
	P0A6Y8 [247-253]	DQGIDLR		0	2	408.714	33.3194	3	116.2	189.4	71.7	22.7	204804	240742	398681	328189	135779	138097	38086.6	49332.9
	P0A6Y8 [254-261]	NDPLAMQR		0	2	472.735	32.918	1	127.1	182.7	71.2	18.9	97019.1	121403	177304	137307	59716	61892.3	12931.6	20239.9
	P0A6Y8 [254-261]	NDPLAMQR	1xOxidation [M6]	0	2	480.732	26.4325	2	64.4	228.1	81.7	25.8	70926.6		270351	233505	93425.8	86795.1	25653.7	31519.1
	P0A6Y8 [26-34]	VLENAEGDR		0	2	501.747	24.0394	4	27.9	202.7	69.4			114312	905943	764388	290049	279744
	P0A6Y8 [271-294]	IELSSAQQTDVNLPYITADATGPK		0	3	844.769	54.8912	3	118.8	186.5	71.6	23.1	212619	232835	400888	304556	119987	149806	46539.1	40266.9
	P0A6Y8 [305-315]	LESLVEDLVNR		0	2	643.852	57.0092	7	109.1	192.9	74.7	23.2	691432	744096	1.34501e+06	1.19541e+06	472438	510055	167822	139106
	P0A6Y8 [322-345]	VALQDAGLSVSDIDDVILVGGQTR		0	2	1221.15	66.035	8	99.6	187.3	83.9	29.2	207744	337343	541644	458071	220147	226315	83853.8	71728
	P0A6Y8 [35-55]	TTPSIIAYTQDGETLVGQPAK		0	2	1095.57	54.2744	2	61	184.4	54.7		108240	129855	431060	297993	97334.9	115993
	P0A6Y8 [35-56]	TTPSIIAYTQDGETLVGQPAKR		1	3	782.749	51.4329	1	116	112.8	71.2		117785	136014	149708	101173	91349.2	66070.2
	P0A6Y8 [353-359]	VAEFFGK		0	2	399.214	39.901	2	77.7	240.8	65.3	16.3	117065	126441	417065	340987	102842	101674	23566.8	27598.3
	P0A6Y8 [363-387]	KDVNPDEAVAIGAAVQGGVLTGDVK		1	3	808.429	54.7042	3	96.9	206.7	76.5	20	358693	408310	846253	788046	289569	315235	81476.5	76776.6
	P0A6Y8 [422-445]	HSQVFSTAEDNQSAVTIHVLQGER		0	4	664.079	45.5453	13	112.9	185.1	69.3	32.6	1.15275e+06	1.33582e+06	2.10528e+06	1.9681e+06	733072	792914	370033	348048
	P0A6Y8 [453-467]	SLGQFNLDGINPAPR		0	2	799.918	53.4835	8	144.1	145.3	77.1	33.4	1.14654e+06	1.24637e+06	1.35496e+06	1.07261e+06	606311	675442	284805	269626
	P0A6Y8 [503-514]	ASSGLNEDEIQK		0	2	645.811	30.8409	3	135.6	163.9	72.3	28.2	1.51346e+06	1.78187e+06	2097789	1.87666e+06	904076	847035	273536	425669
	P0A6Y8 [518-528]	DAEANAEADRK		1	3	397.187	19.9177	5	36.6	224.9	106.7	31.9	74113.9	175823	723907	680274	327570	338063	83607.9	118157
	P0A6Y8 [529-536]	FEELVQTR		0	2	511.268	37.0443	4	120.3	183.8	78.6	17.3	1.13237e+06	1.29122e+06	2.07012e+06	1650001	770030	811201	191687	157784
	P0A6Y8 [537-547]	NQGDHLLHSTR		0	3	426.55	23.1813	6	142.7	166.4	66.5	24.3	730892	785307	930522	838029	392603	317533	122246	136552
	P0A6Y8 [548-562]	KQVEEAGDKLPADDK		2	3	548.281	24.4774	2	83.6	253.1	52.2	11	129083	142538	496470	339725	84977.7	84379.6	17749.6	18105.1
	P0A6Y8 [549-562]	QVEEAGDKLPADDK		1	3	505.583	27.4055	1	60.4	282.8	45.4	11.3	101270	116038	550487	467626	82024.6	80996.3	19048.4	21508
	P0A6Y8 [563-577]	TAIESALTALETALK		0	2	766.433	75.8903	2	67.1	280.1	41.6	11.2	43893.9	46217.7	201737	175173	24381.8	31983.2	7549.07
	P0A6Y8 [563-581]	TAIESALTALETALKGEDK		1	3	654.352	72.607	5	73	255.2	55.1	16.7	386403	557361	1.80886e+06	1.45337e+06	345938	353944	142144	79257.3
	P0A6Y8 [57-70]	QAVTNPQNTLFAIK		0	2	772.926	49.8085	2	93.5	216.2	76.2	14.2	161327	157165	409865	330717	130892	128617	20917.3	27810.5
	P0A6Y8 [588-597]	MQELAQVSQK		0	2	581.3	31.8894	6	165.3	123.7	81.2	29.9	483806	677042	541474	338870	264584	298572	93541.3	114261
	P0A6Y8 [588-597]	MQELAQVSQK	1xOxidation [M1]	0	2	589.299	27.6481	6	99.5	194	77	29.5	325450	589125	931756	782156	360868	318100	120110	140298
	P0A6Y8 [598-622]	LMEIAQQQHAQQQTAGADASANNAK		0	3	875.423	32.8984	2	33.2	235.8	31		20593.2	26807.6	185727	149738	22637.3	21281.4
	P0A6Y8 [598-622]	LMEIAQQQHAQQQTAGADASANNAK	1xOxidation [M2]	0	3	880.752	28.9453	2	29.4	244.1	26.5		29116.3	31421.3	282480	223088	25276.4	29394.4
	P0A6Y8 [77-84]	FQDEEVQR		0	2	525.747	27.409	1	76.4	216.1	78.8	28.6	255225	498897	1.11605e+06	912479	385868	350725	121729	146779
	P0A6Y8 [85-92]	DVSIMPFK		0	2	468.747	50.6823	1	91.8	151.1	57.1		100211	110444	198419	151242	65493.9
FALSE	P60438	Large ribosomal subunit protein uL3 [OS=Escherichia coli K-12]	67	14	14	22.2	9.91	124	52.6	199.7	114.3	33.5	8.40522e+06	1.15801e+07	4.17681e+07	3.36037e+07	2.10756e+07	2.18003e+07	6.41454e+06	6.14458e+06
	Positions in Master Proteins	Sequence	Modifications	# Missed Cleavages	PSM Charge (by Search Engine): Sequest HT	PSM m/z [Da] (by Search Engine): Sequest HT	PSM RT [min] (by Search Engine): Sequest HT	# PSMs	Abundances (Grouped): 1	Abundances (Grouped): 2	Abundances (Grouped): 3	Abundances (Grouped): 4	Abundance: F5: Sample, 1	Abundance: F6: Sample, 1	Abundance: F7: Sample, 2	Abundance: F8: Sample, 2	Abundance: F9: Sample, 3	Abundance: F10: Sample, 3	Abundance: F11: Sample, 4	Abundance: F12: Sample, 4
	P60438 [1-7]	MIGLVGK	1xOxidation [M1]	0	2	367.218	32.4249	5	27.7	236.5	104.3	31.4	180273	253558	2.00351e+06	1.66155e+06	817040	792578	232206	253147
	P60438 [106-114]	KVDVTGTSK		1	2	467.763	19.4874	6	6.6	194.8	154.8	43.8	27690.3	67903.3	1.40639e+06	1.16328e+06	1.02554e+06	1.00757e+06	274861	300203
	P60438 [107-114]	VDVTGTSK		0	2	403.716	21.5437	6	2.5	258.7	116.1	22.7	11488.7	36235	2297178	2.01912e+06	987400	946818	181664	197245
	P60438 [117-123]	GFAGTVK		0	2	340.192	26.2082	4	7.4	252.1	112	28.5	23005.5	136921	2.11355e+06	1.72703e+06	902121	798560	198749	235307
	P60438 [129-141]	TQDATHGNSLSHR		0	2	712.336	19.5565	10	4.4	236.9	135.3	23.4	40410.5	97828.8	3542603	3.24418e+06	1.91664e+06	1.95669e+06	298896	375618
	P60438 [14-33]	IFTEDGVSIPVTVIEVEANR		0	2	1094.58	64.0253	13	17	214.8	137.6	30.5	276542	271958	3.72015e+06	3.21295e+06	2.04567e+06	2396985	554142	434653
	P60438 [161-169]	MAGQMGNER		0	2	497.216	22.797	3	4.7	180.5	189.9	24.9		7350.45	392093	205488	290564	307049	33339.6	45981.8
	P60438 [161-169]	MAGQMGNER	1xOxidation [M]	0	2	505.213	20.0052	7		179.1	109.8	11.1			966535	641312	471731	494393	40256.6	59100.1
	P60438 [161-169]	MAGQMGNER	2xOxidation [M1; M5]	0	2	513.21	17.1754	3	5.8	221.6	153.9	18.7		7264.97	223076	344016	213493	173332	26389.3	20782.5
	P60438 [170-179]	VTVQSLDVVR		0	2	558.325	43.0526	6	6.3	244.3	130.3	19	187653	218336	8479187	7170840	4.10855e+06	4209717	576169	640663
	P60438 [191-208]	GAVPGATGSDLIVKPAVK		0	3	560.662	40.0326	11	6.6	245.7	129.8	17.9	113298	131278	5.16661e+06	3.96182e+06	2.31217e+06	2.47237e+06	313300	345306
	P60438 [39-46]	DLANDGYR		0	2	462.214	29.7776	9	10.5	238.9	124.4	26.2	67334.5	198080	3017203	2.29964e+06	1.45597e+06	1.29096e+06	254006	328759
	P60438 [60-70]	VTKPEAGHFAK		0	3	395.552	22.5873	5	15	250.9	115.1	19.1	106724	152880	2.35538e+06	1.94069e+06	1.01275e+06	949535	150092	175936
	P60438 [71-77]	AGVEAGR		0	2	330.177	18.9413	1	1.9	237.5	145	15.6	4077.22	8857.38	726605	742287	464485	432612	50324.1	46165.7
	P60438 [84-105]	LAEGEEFTVGQSISVELFADVK		0	2	1184.6	69.5023	29	177.2	94	68.3	60.6	4.21993e+06	5.42382e+06	2.97852e+06	2.16305e+06	1.7534e+06	1.93718e+06	1.89771e+06	1.40856e+06
	P60438 [84-106]	LAEGEEFTVGQSISVELFADVKK		1	3	832.767	65.1047	6	185.5	79.4	71.3	63.8	3.14679e+06	4567860	2.3795e+06	1.10648e+06	1.29805e+06	1.63399e+06	1.33243e+06	1.27716e+06
FALSE	P0AG48	Large ribosomal subunit protein bL21 [OS=Escherichia coli K-12]	67	6	6	11.6	9.85	117	44.9	209.8	100.8	44.5	1.94911e+07	2.1407e+07	1.06623e+08	8.52836e+07	4.43182e+07	4.73483e+07	1.99441e+07	2.05343e+07
	Positions in Master Proteins	Sequence	Modifications	# Missed Cleavages	PSM Charge (by Search Engine): Sequest HT	PSM m/z [Da] (by Search Engine): Sequest HT	PSM RT [min] (by Search Engine): Sequest HT	# PSMs	Abundances (Grouped): 1	Abundances (Grouped): 2	Abundances (Grouped): 3	Abundances (Grouped): 4	Abundance: F5: Sample, 1	Abundance: F6: Sample, 1	Abundance: F7: Sample, 2	Abundance: F8: Sample, 2	Abundance: F9: Sample, 3	Abundance: F10: Sample, 3	Abundance: F11: Sample, 4	Abundance: F12: Sample, 4
	P0AG48 [1-10]	MYAVFQSGGK		0	2	544.265	40.7794	8	10.5	194.6	138.2	56.7	250285	322487	6453164	4.25373e+06	3.69817e+06	3747465	1.43802e+06	1.61861e+06
	P0AG48 [1-10]	MYAVFQSGGK	1xOxidation [M1]	0	2	552.264	36.2075	26	12.9	243.1	100	44	621271	752457	15599353	10704865	5.20945e+06	5.427e+06	2.27538e+06	2.40682e+06
	P0AG48 [14-21]	VSEGQTVR		0	2	438.233	20.3234	6	1.7	255.6	108	34.7	105130	192483	22695996	19345222	8566333	9147723	2.51375e+06	3.22445e+06
	P0AG48 [25-48]	LDIATGETVEFAEVLMIANGEEVK		0	3	860.104	75.8369	18	206	100.2	48.9	44.9	6.26102e+06	5.48922e+06	3.43954e+06	2.36597e+06	1.48928e+06	1.30024e+06	1.46311e+06	1.11806e+06
	P0AG48 [25-48]	LDIATGETVEFAEVLMIANGEEVK	1xOxidation [M16]	0	3	865.436	72.0453	26	198	96.8	55.1	50.1	1.08896e+07	1.31211e+07	7167363	4.76091e+06	3.06382e+06	3.6087e+06	3.22592e+06	2.83758e+06
	P0AG48 [49-60]	IGVPFVDGGVIK		0	2	600.854	55.3316	19	8.1	226.6	116.6	48.6	1.03804e+06	1.14011e+06	3.3223e+07	2.76462e+07	1.47206e+07	1.65237e+07	6.559e+06	6.45336e+06
	P0AG48 [61-68]	AEVVAHGR		0	2	419.73	18.6677	6	1.8	259	105.1	34	69178.5	118468	13204018	12240096	5.15545e+06	5.16172e+06	1.49575e+06	1.86189e+06
	P0AG48 [91-97]	QWFTDVK		0	2	462.235	45.25	8	13.1	217.4	120.2	49.3	256531	270715	4840692	3.96666e+06	2.41505e+06	2431814	973160	1.0135e+06
FALSE	P02359	Small ribosomal subunit protein uS7 [OS=Escherichia coli K-12]	72	18	18	20	10.36	117	11.5	254.2	107.6	26.8	5.50578e+06	6.23351e+06	1.43128e+08	1.17578e+08	5.32175e+07	5.6694e+07	1.34494e+07	1.3863e+07
	Positions in Master Proteins	Sequence	Modifications	# Missed Cleavages	PSM Charge (by Search Engine): Sequest HT	PSM m/z [Da] (by Search Engine): Sequest HT	PSM RT [min] (by Search Engine): Sequest HT	# PSMs	Abundances (Grouped): 1	Abundances (Grouped): 2	Abundances (Grouped): 3	Abundances (Grouped): 4	Abundance: F5: Sample, 1	Abundance: F6: Sample, 1	Abundance: F7: Sample, 2	Abundance: F8: Sample, 2	Abundance: F9: Sample, 3	Abundance: F10: Sample, 3	Abundance: F11: Sample, 4	Abundance: F12: Sample, 4
	P02359 [103-109]	WIVEAAR		0	2	422.737	39.1838	8	11.7	261.7	103.9	22.6	253433	290471	7221911	5062928	2.37603e+06	2423304	488233	560053
	P02359 [11-17]	KILPDPK		1	2	405.757	26.4166	3	13.8	246.3	114.9	25	95386.8	117556	2.19809e+06	1.61472e+06	884380	873179	173945	210565
	P02359 [12-17]	ILPDPK		0	2	341.711	27.5638	4	8.8	292.7	79.4	19.1	48120.4	125792	2.98015e+06	2.26946e+06	730024	681531	165946	174357
	P02359 [120-131]	LANELSDAAENK		0	2	637.814	33.5524	8	10.2	264.3	103.4	22.1	745105	936802	24186456	19476310	8650245	8.33937e+06	1.73091e+06	1908997
	P02359 [138-143]	REDVHR		1	2	406.212	16.6777	4	1.4	279.7	99.3	19.7	9462.38	16525.6	2.65921e+06	2.43498e+06	910514	896212	179899	178574
	P02359 [150-155]	AFAHYR		0	2	382.696	24.0959	8	14.3	258.5	103.2	23.9	160437	191999	3.75976e+06	2.66439e+06	1.17997e+06	1.35338e+06	278778	307286
	P02359 [161-171]	SFSHQAGASSK		0	2	553.764	19.2948	8	3.1	264.6	109.4	22.9	69310.9	125003	8.02231e+06	7.89706e+06	3.32949e+06	3.24947e+06	614897	771417
	P02359 [18-25]	FGSELLAK		0	2	432.745	39.6571	4	12.4	249.8	110.3	27.5	644191	755197	15335966	12798641	6.02701e+06	6351215	1.42585e+06	1.66447e+06
	P02359 [26-35]	FVNILMVDGK		0	2	568.313	54.2554	4	9.1	268	102.7	20.2	73379.6	82725.9	2.53265e+06	2.06399e+06	790484	971302	182993	162294
	P02359 [26-35]	FVNILMVDGK	1xOxidation [M6]	0	2	576.31	50.8052	5	8.2	273.2	99.7	18.9	219231	307211	9298043	8.03518e+06	2.90835e+06	3419533	629585	570821
	P02359 [26-36]	FVNILMVDGKK		1	2	632.36	47.3868	6	14.7	240.1	114.3	30.8	110530	154086	2.35812e+06	1.91747e+06	1.0378e+06	988284	262354	284035
	P02359 [26-36]	FVNILMVDGKK	1xOxidation [M6]	1	2	640.358	44.4163	6	13.3	240.4	118	28.3	389334	275514	6.46724e+06	5.43949e+06	2.89693e+06	2.92566e+06	702521	693879
	P02359 [36-53]	KSTAESIVYSALETLAQR		1	3	656.352	69.0238	3	27.5	75.1	215.7	81.8	52413.9	52953	159677	130109	371851	460631	170810	144206
	P02359 [37-53]	STAESIVYSALETLAQR		0	2	919.98	75.1376	12	15.3	254.8	97.4	32.5	657834	766136	12618400	1.11417e+07	4.28147e+06	4.80294e+06	1.65077e+06	1.38807e+06
	P02359 [57-76]	SELEAFEVALENVRPTVEVK		0	2	1130.09	65.2859	10	14	245.7	107.1	33.2	1.17637e+06	1.06506e+06	2.14388e+07	1.79058e+07	7.72697e+06	9.44817e+06	2.68939e+06	2.60036e+06
	P02359 [79-95]	RVGGSTYQVPVEVRPVR		1	4	475.519	37.8413	5	10.6	255.9	108.7	24.8	121447	124204	3383472	2.5994e+06	1.23749e+06	1.28243e+06	274700	300803
	P02359 [79-96]	RVGGSTYQVPVEVRPVRR		2	4	514.545	34.4652	5		171.7	92.9	35.5			968967	713197	441475	458166	169589	173932
	P02359 [80-95]	VGGSTYQVPVEVRPVR		0	3	581.656	40.92	6	11	250.9	115.6	22.5	465687	535217	12869813	10075881	5.16693e+06	5329669	976754	1.07063e+06
	P02359 [80-96]	VGGSTYQVPVEVRPVRR		1	3	633.69	37.112	6	16.4	194.6	143.6	45.3	184144	237739	3.01619e+06	2.05309e+06	1.74704e+06	1.93021e+06	584035	575414
	P02359 [97-102]	NALAMR		0	2	338.184	27.5191	2	8.8	273.7	97	20.6	29959.8	73321.4	1.65276e+06	1.28375e+06	523038	509337	97425.9	122823
FALSE	B1XDV1	Small ribosomal subunit protein bS6 [OS=Escherichia coli str. K-12 substr. DH10B]	82	9	9	15.2	5.39	116	18.2	183.7	117.7	80.4	8.32855e+06	9.48815e+06	1.02743e+08	7.83608e+07	5.6595e+07	5.84478e+07	3.7319e+07	4.13246e+07
	Positions in Master Proteins	Sequence	Modifications	# Missed Cleavages	PSM Charge (by Search Engine): Sequest HT	PSM m/z [Da] (by Search Engine): Sequest HT	PSM RT [min] (by Search Engine): Sequest HT	# PSMs	Abundances (Grouped): 1	Abundances (Grouped): 2	Abundances (Grouped): 3	Abundances (Grouped): 4	Abundance: F5: Sample, 1	Abundance: F6: Sample, 1	Abundance: F7: Sample, 2	Abundance: F8: Sample, 2	Abundance: F9: Sample, 3	Abundance: F10: Sample, 3	Abundance: F11: Sample, 4	Abundance: F12: Sample, 4
	B1XDV1 [113-131]	RDDFANETADDAEAGDSEE		1	2	1028.9	36.0181	2		139.9	87.5	72.6			349884	233624	202849	157568	134534	163462
	B1XDV1 [25-35]	YTAAITGAEGK		0	2	541.28	30.1855	7	20.3	195.2	116.3	68.3	2.76645e+06	3.4936e+06	34679648	25818582	18041100	17621752	9734996	11247693
	B1XDV1 [3-24]	HYEIVFMVHPDQSEQVPGMIER		0	4	661.068	53.5933	13	27.8	85.6	165.5	121.1	214015	256771	879499	593825	1.27338e+06	1.53296e+06	1.04456e+06	1.00119e+06
	B1XDV1 [3-24]	HYEIVFMVHPDQSEQVPGMIER	1xOxidation [M]	0	4	665.068	50.4934	9	12.4	141.1	126.9	119.6	133716	196365	2.12405e+06	1.60712e+06	1.45852e+06	1.89248e+06	1.69165e+06	1.4478e+06
	B1XDV1 [3-24]	HYEIVFMVHPDQSEQVPGMIER	2xOxidation [M7; M19]	0	4	669.066	47.2072	31	6.6	201	69.6	122.8	207991	168591	6.2481e+06	5.19623e+06	1.88216e+06	2.06702e+06	3.50945e+06	3.45541e+06
	B1XDV1 [39-44]	LEDWGR		0	2	388.189	33.384	3	17.8	188.9	128.6	64.8	279359	322640	3.91057e+06	2.60021e+06	2.19804e+06	2144616	1.05419e+06	1.1345e+06
	B1XDV1 [45-53]	RQLAYPINK		1	3	368.216	30.7975	7	19.7	173.5	125.8	81	305929	327182	3.28721e+06	2.36818e+06	1.9523e+06	2.0974e+06	1.20149e+06	1.4131e+06
	B1XDV1 [46-53]	QLAYPINK		0	2	473.771	35.8071	6	17.4	190.8	119.1	72.7	429648	497475	5758627	4.47232e+06	3176878	3.15661e+06	1.85058e+06	2.01819e+06
	B1XDV1 [57-79]	AHYVLMNVEAPQEVIDELETTFR		0	3	902.115	74.4725	8	34	165	115.1	85.9	342309	426466	2.29584e+06	1.4987e+06	1.25891e+06	1.3311e+06	1.05604e+06	882986
	B1XDV1 [57-79]	AHYVLMNVEAPQEVIDELETTFR	1xOxidation [M6]	0	3	907.447	70.9601	8	31.5	149.7	100.6	118.1	1.11258e+06	792697	5.33897e+06	3.72661e+06	2604105	3.44834e+06	3504352	3533457
	B1XDV1 [80-86]	FNDAVIR		0	2	417.727	34.1789	10	15.1	185.4	124.6	74.9	1.50192e+06	1.58762e+06	20857832	17117942	12580725	12821273	7036170	8.2836e+06
	B1XDV1 [94-104]	HAVTEASPMVK		0	2	585.303	25.9418	8	19.8	184	121.4	74.8	737444	904907	9007999	6385014	4949414	5059440	2.74319e+06	3.46863e+06
	B1XDV1 [94-104]	HAVTEASPMVK	1xOxidation [M9]	0	2	593.301	22.8403	4	9.9	185.9	128.2	76	297182	513846	8.00494e+06	6.74247e+06	5.01663e+06	5.11723e+06	2.75779e+06	3.27461e+06
FALSE	P06987	Histidine biosynthesis bifunctional protein HisB [OS=Escherichia coli K-12]	55	17	17	40.3	6.18	115	205	77.8	104.2	12.9	5.98155e+07	7.04792e+07	2.81348e+07	2.15955e+07	3.16745e+07	3.4404e+07	4.33223e+06	3.85423e+06
	Positions in Master Proteins	Sequence	Modifications	# Missed Cleavages	PSM Charge (by Search Engine): Sequest HT	PSM m/z [Da] (by Search Engine): Sequest HT	PSM RT [min] (by Search Engine): Sequest HT	# PSMs	Abundances (Grouped): 1	Abundances (Grouped): 2	Abundances (Grouped): 3	Abundances (Grouped): 4	Abundance: F5: Sample, 1	Abundance: F6: Sample, 1	Abundance: F7: Sample, 2	Abundance: F8: Sample, 2	Abundance: F9: Sample, 3	Abundance: F10: Sample, 3	Abundance: F11: Sample, 4	Abundance: F12: Sample, 4
	P06987 [11-26]	DGTLISEPPSDFQVDR		0	2	888.427	49.5026	6	156.7	106.1	118.1	19.1	426894	470490	337093	273226	315171	362188	53421.1	55630.7
	P06987 [11-29]	DGTLISEPPSDFQVDRFDK		1	3	722.683	51.3809	6	203.6	69.4	112.3	14.7	3.17582e+06	3727532	1312499	1.04808e+06	1616745	2.22832e+06	256269	240508
	P06987 [114-122]	YLAEQAMDR		0	2	548.758	34.731	10	218.9	77.3	93.4	10.3	3.47045e+06	4.12715e+06	1.52268e+06	1.17283e+06	1.53883e+06	1.69551e+06	174991	182249
	P06987 [114-122]	YLAEQAMDR	1xOxidation [M7]	0	2	556.756	27.5733	3	170.4	99.7	117.8	12.2	1.97058e+06	3.18713e+06	1.64258e+06	1308456	1843609	1.62843e+06	161987	199369
	P06987 [123-131]	ANSYVIGDR		0	2	497.752	32.2996	4	205.2	78.9	104.3	11.6	4.69024e+06	5.67097e+06	2250839	1.74704e+06	2.64453e+06	2.59899e+06	274219	308601
	P06987 [177-188]	ETQIDVQVWLDR		0	2	751.386	57.6742	8	213.5	68	89.6	28.9	1.10642e+06	1.19565e+06	467609	287170	393304	593206	205861	117604
	P06987 [194-215]	INTGVGFFDHMLDQIATHGGFR		0	3	811.729	69.8247	4	263.4	68.5	56.7	11.4	1.03653e+06	1.32636e+06	367107	253205	247958	256789	52535.5	48837.5
	P06987 [194-215]	INTGVGFFDHMLDQIATHGGFR	1xOxidation [M11]	0	4	613.049	58.5797	5	216.2	68.8	97.1	17.9	598712	649949	222310	177228	252053	311820	74834.1	35666.3
	P06987 [216-221]	MEINVK		0	2	367.199	31.9936	5	217.5	68.3	104	10.2	1.72077e+06	2.2768e+06	621290		921256	973178	91267	95313.5
	P06987 [222-244]	GDLYIDDHHTVEDTGLALGEALK		0	3	828.075	54.4967	6	194.9	83	105.5	16.5	4.8216e+06	5522909	2.35571e+06	2.04985e+06	2557074	3.05253e+06	462717	412449
	P06987 [256-268]	FGFVLPMDECLAR	1xCarbamidomethyl [C10]	0	2	777.876	63.4587	2	252.1	37.6	95.6	14.8	703555	911609	137005	104205	288204	320064	54146.6	40575.4
	P06987 [256-268]	FGFVLPMDECLAR	1xOxidation [M7]; 1xCarbamidomethyl [C10]	0	2	785.875	57.3127	5	218.5	54.1	114.9	12.4	1.50452e+06	1.74557e+06	449375	358666	800765	906183	101726	83724.3
	P06987 [269-282]	CALDISGRPHLEYK	1xCarbamidomethyl [C1]	0	3	553.616	39.2868	6	220.9	61.9	106.6	10.6	2.12383e+06	2225972	700932	528846	985480	1116060	106756	102636
	P06987 [283-289]	AEFTYQR		0	2	457.722	32.1285	1	211.7	81.1	97.1	10	4.52523e+06	5194119	2.1425e+06	1.6101e+06	2.19619e+06	2.2523e+06	220045	238408
	P06987 [290-303]	VGDLSTEMIEHFFR		0	2	840.907	64.7371	10	240.5	58.1	88.1	13.3	4.20235e+06	4.98617e+06	1.22255e+06	1.00155e+06	1.58246e+06	1.77755e+06	286262	223012
	P06987 [290-303]	VGDLSTEMIEHFFR	1xOxidation [M8]	0	3	566.272	56.0843	5	206.7	75.7	104.1	13.5	3.00491e+06	3251080	1.18912e+06	1.1034e+06	1.51081e+06	1.63923e+06	204683
	P06987 [30-42]	LAFEPGVIPELLK		0	2	713.422	64.8384	10	232.4	62.3	93.8	11.5	9322900	10420834	3.25362e+06	2.14778e+06	3.72929e+06	4.24799e+06	509352	466012
	P06987 [304-316]	SLSYTMGVTLHLK		0	3	483.93	50.3672	2	222.5	63.7	91.1	22.7	906131	1.21504e+06	354593	254235	378354	488226	131261	87088.7
	P06987 [304-316]	SLSYTMGVTLHLK	1xOxidation [M6]	0	3	489.262	44.8475	6	137.7	123.2	115.2	23.9	1.27255e+06	1339217	1.2864e+06	1.06138e+06	1.14314e+06	1.04377e+06	270336	189693
	P06987 [326-331]	VESLFK		0	2	361.708	37.6603	1	200.4	84.1	104	11.5	3.12755e+06	3403569	1.57524e+06	1.18931e+06	1638733	1.75165e+06	174212	202353
	P06987 [343-352]	VEGDTLPSSK		0	2	516.763	26.4825	3	137.8	117.4	132	12.8	2.80089e+06	4.23486e+06	3147331	2.7325e+06	3279760	3.31557e+06	291358	353504
	P06987 [5-10]	YLFIDR		0	2	413.727	46.3897	7	199.5	81.4	108.8	10.3	3303051	3.39621e+06	1.57641e+06	1.18641e+06	1.81079e+06	1.84445e+06	173988	171002
FALSE	P62399	Large ribosomal subunit protein uL5 [OS=Escherichia coli K-12]	71	17	17	20.3	9.48	111	26.6	230.6	124.7	18.1	5.33772e+06	6.13438e+06	5.53517e+07	4.44978e+07	2.61502e+07	2.75229e+07	3.92529e+06	3.88391e+06
	Positions in Master Proteins	Sequence	Modifications	# Missed Cleavages	PSM Charge (by Search Engine): Sequest HT	PSM m/z [Da] (by Search Engine): Sequest HT	PSM RT [min] (by Search Engine): Sequest HT	# PSMs	Abundances (Grouped): 1	Abundances (Grouped): 2	Abundances (Grouped): 3	Abundances (Grouped): 4	Abundance: F5: Sample, 1	Abundance: F6: Sample, 1	Abundance: F7: Sample, 2	Abundance: F8: Sample, 2	Abundance: F9: Sample, 3	Abundance: F10: Sample, 3	Abundance: F11: Sample, 4	Abundance: F12: Sample, 4
	P62399 [103-110]	LITIAVPR		0	2	441.792	46.215	3	24.2	251.4	111.5	12.9	323411	363037	3.97533e+06	3.19581e+06	1.59796e+06	1.56205e+06	190771	176032
	P62399 [126-133]	GNYSMGVR		0	2	442.208	29.9725	4	28.8	219.7	136	15.5	120588	173233	1.36282e+06	890146	667644	695956	70894.4	84755.7
	P62399 [126-133]	GNYSMGVR	1xOxidation [M5]	0	2	450.206	23.2617	2	11.1	232.7	133.5	22.7	86951.5	112544	2.64409e+06	1.62955e+06	1.23178e+06	1.15241e+06	179171	229228
	P62399 [134-145]	EQIIFPEIDYDK		0	2	755.379	55.4662	4	21.1	261.8	103.6	13.5	125209	147589	1.82709e+06	1.55768e+06	655819	679831	79516.2	94701.3
	P62399 [134-148]	EQIIFPEIDYDKVDR		1	3	627.32	53.3083	10	34	201	139.6	25.4	398235	448528	2.84168e+06	2.1958e+06	1.62764e+06	1.84877e+06	357509	279468
	P62399 [15-30]	KLMTEFNYNSVMQVPR	1xOxidation [M3]	1	3	658.326	49.3907	1	20.6	199.1	157	23.4	25310.1	27717.4	285126	230722	206519	198084	20139.3	45217.3
	P62399 [15-30]	KLMTEFNYNSVMQVPR	2xOxidation [M3; M12]	1	3	663.657	43.0886	4	32.2	191.1	154.2	22.6	75013.3	104246	597493	461548	405769	442164	61115.3	62821.2
	P62399 [151-161]	GLDITITTTAK		0	2	567.325	44.4964	12	32.5	230	118.1	19.4	825442	742977	5908682	5.20386e+06	2818158	2.87865e+06	517893	423364
	P62399 [16-30]	LMTEFNYNSVMQVPR		0	2	914.94	56.254	4	36.7	187.5	150.8	25	61562.6	70339.8	386822	292580	242953	301190	55520	36341.1
	P62399 [16-30]	LMTEFNYNSVMQVPR	1xOxidation [M2]	0	2	922.938	53.3875	5	18.7	244.1	122.6	14.6	63893.8	43255.7	739316	637609	322437	368790	41089.2
	P62399 [16-30]	LMTEFNYNSVMQVPR	2xOxidation [M2; M11]	0	3	620.959	46.6726	6	18.2	250.1	115.7	16	100098	74868.1	1.30934e+06	1.08613e+06	530722	572792	78652	74437
	P62399 [168-178]	ALLAAFDFPFR		0	2	634.345	68.3568	4	41.1	232.2	111.7	15	64714	65496.3	389973	347531	165502	189422	28750.7	19601.9
	P62399 [168-179]	ALLAAFDFPFRK		1	2	698.393	60.5117	15	37.3	218.4	125.4	18.9	621171	700439	4.23541e+06	3.51664e+06	2.05548e+06	2.39101e+06	348947	319885
	P62399 [34-47]	ITLNMGVGEAIADK		0	2	716.378	50.8196	7	31.8	224.2	127.8	16.3	304013	261965	2125409	1.86655e+06	1.03215e+06	1.24944e+06	167705	124449
	P62399 [34-47]	ITLNMGVGEAIADK	1xOxidation [M5]	0	2	724.376	45.4685	9	23.1	242.2	121.6	13.2	282169	341254	3664273	2.89267e+06	1.67054e+06	1.59884e+06	173271	181390
	P62399 [34-48]	ITLNMGVGEAIADKK		1	3	520.621	46.5442	2	24.6	235.2	121.3	18.9	235521	254991	2571386	2.14293e+06	1.2358e+06	1.18629e+06	187140	190693
	P62399 [34-48]	ITLNMGVGEAIADKK	1xOxidation [M5]	1	3	525.952	41.0621	3	20.2	234.1	126.8	19	308992	336634	4.13202e+06	3.39439e+06	2.03152e+06	2.02412e+06	249869	368809
	P62399 [4-9]	LHDYYK		0	2	419.708	24.7418	1	26.3	276.2	80.7	16.8	203790	277059	3.11827e+06	1.99224e+06	695382	762621	143602	160743
	P62399 [48-69]	KLLDNAAADLAAISGQKPLITK		1	3	751.106	55.9864	5	34.1	202.5	142.5	20.9	301067	414638	2.31981e+06	1.89421e+06	1.32412e+06	1.64431e+06	221936	209951
	P62399 [49-69]	LLDNAAADLAAISGQKPLITK		0	3	708.408	57.2535	5	22.3	240.8	119.2	17.7	552832	694212	7.20642e+06	6.18685e+06	3.22537e+06	3.38863e+06	482665	497119
	P62399 [72-78]	KSVAGFK		1	2	368.721	21.7242	2	27	153.1	195.5	24.4	100571	174425	796077	708196	967282	949889	114527	124930
	P62399 [73-78]	SVAGFK		0	1	608.34	26.4863	2	11.5	278.8	90.7	19.1	9542.29	26385.3	426581	348721	119436	131753	26192.3	26602.2
	P62399 [81-88]	QGYPIGCK	1xCarbamidomethyl [C7]	0	2	461.726	29.2887	1	21.4	225.1	138.7	14.8	147623	278546	2488298	1.82542e+06	1.3202e+06	1.30586e+06	128412	153378
FALSE	C4ZT56	Peptide chain release factor 3 [OS=Escherichia coli BW2952]	54	22	22	59.5	5.97	111	321	37.7	33.9	7.4	4.86822e+07	5.76818e+07	7.28321e+06	5.30826e+06	5.41658e+06	5.77896e+06	1.3197e+06	1.12717e+06
	Positions in Master Proteins	Sequence	Modifications	# Missed Cleavages	PSM Charge (by Search Engine): Sequest HT	PSM m/z [Da] (by Search Engine): Sequest HT	PSM RT [min] (by Search Engine): Sequest HT	# PSMs	Abundances (Grouped): 1	Abundances (Grouped): 2	Abundances (Grouped): 3	Abundances (Grouped): 4	Abundance: F5: Sample, 1	Abundance: F6: Sample, 1	Abundance: F7: Sample, 2	Abundance: F8: Sample, 2	Abundance: F9: Sample, 3	Abundance: F10: Sample, 3	Abundance: F11: Sample, 4	Abundance: F12: Sample, 4
	C4ZT56 [102-117]	TLTAVDCCLMVIDAAK	2xCarbamidomethyl [C7; C8]	0	2	890.937	56.5165	2	256.8	18.7	24.5		808523	941810	65945.4	61450.1	76888.5	89824.5
	C4ZT56 [102-117]	TLTAVDCCLMVIDAAK	2xCarbamidomethyl [C7; C8]; 1xOxidation [M10]	0	2	898.932	53.1628	2	100					752625
	C4ZT56 [126-131]	LMEVTR	1xOxidation [M2]	0	2	382.702	23.2251	1	219.4	99.9	69.4	11.3	323310	343459	169905	135666	111483	99597.6	14844.9	19929.8
	C4ZT56 [132-143]	LRDTPILTFMNK		1	3	483.602	50.8982	4	252.6	24.5	22.9		1.11399e+06	1.34378e+06	154411	90850.5	109036	113311
	C4ZT56 [132-143]	LRDTPILTFMNK	1xOxidation [M10]	1	3	488.935	43.9666	3	311	44.4	37.2	7.5	1.86749e+06	2.12055e+06	312370	258040	239949	235930	45080.5	51017.3
	C4ZT56 [14-26]	RTFAIISHPDAGK		1	3	471.593	32.9531	2	310.9	45.2	35.1	8.8	297926	349216	51635.1	42644.9	34303.2	38614.7	7484.68	11206.8
	C4ZT56 [144-163]	LDRDIRDPMELLDEVENELK		2	4	611.309	70.1933	3	375.5	9.9	9.3	5.2	1.0949e+06	1.58247e+06	48804	24878.2	28983.8	36678.3	18373.5
	C4ZT56 [144-163]	LDRDIRDPMELLDEVENELK	1xOxidation [M9]	2	4	615.309	65.6871	2	244.4	30.6	24.9		234595	270110	32449.9	30628.5	29469.4	22382.1
	C4ZT56 [147-163]	DIRDPMELLDEVENELK		1	3	686.673	75.0708	2	322.4	44	24.6	8.9	684983	855319	115306	94830.1	55428.5	61628.1	22425.1	20004
	C4ZT56 [147-163]	DIRDPMELLDEVENELK	1xOxidation [M6]	1	3	692.002	69.6818	1	227.1	49.1	23.7		307517	406100	86774.2	67340.5	29150.6	46701.3
	C4ZT56 [15-26]	TFAIISHPDAGK		0	2	628.836	37.4944	12	316.9	38.6	35.4	9	5.79619e+06	6323602	818078	665433	627217	730228	159888	184624
	C4ZT56 [164-177]	IGCAPITWPIGCGK	2xCarbamidomethyl [C3; C12]	0	2	765.384	53.8065	4	230.3	22.4	47.3		943332	1.04935e+06	115502	80717.7	204436
	C4ZT56 [181-197]	GVYHLYKDETYLYQSGK		1	3	688.673	42.1364	4	353.9	9.8	26.8	9.6	2332834	2.55474e+06	78087	58391.2	177901	191502	72240.2	60765.5
	C4ZT56 [198-205]	GHTIQEVR		0	2	470.254	22.2431	6	287.3	58.3	45.9	8.6	1.96087e+06	3247239	554000	472540	390851	415005	72050.1	79432.6
	C4ZT56 [209-228]	GLNNPDLDAAVGEDLAQQLR		0	2	1055.03	59.8916	2	236.1	32.6	31.3		241506	264006	43526.7	27845.8	30805.4	36455.8
	C4ZT56 [288-302]	TVEASEDKFTGFVFK		1	3	568.952	50.805	4	337.5	18	36.1	8.4	6.66495e+06	7.05227e+06	427491	312627	674080	798187	175042	166315
	C4ZT56 [33-47]	VLLFGQAIQTAGTVK		0	2	773.453	56.203	9	318.6	39.1	34.8	7.5	9557008	10831666	1.42636e+06	1.09282e+06	1.04214e+06	1.18781e+06	267856	211619
	C4ZT56 [339-353]	DVVISDALTFMAGDR		0	2	805.399	67.3884	6	315.7	39.4	30.9	13.9	1.838e+06	2.64725e+06	431891	175846	214486	217747	112788	83763.4
	C4ZT56 [339-353]	DVVISDALTFMAGDR	1xOxidation [M11]	0	2	813.396	55.5411	2	270.7	61.8	44.7	22.8	497555	588799	156951	97107.5	83113.2	96292.6	62908.7	32910.3
	C4ZT56 [354-386]	SHVEEAYPGDILGLHNHGTIQIGDTFTQGEMMK	2xOxidation [M31; M32]	0	4	915.176	52.1145	2	142.4	117.9	39.7		379051	353800	339710	270828	107646	97093
	C4ZT56 [387-399]	FTGIPNFAPELFR		0	2	754.898	66.2748	6	329.1	32.3	30.2	8.4	1.9548e+06	2.36787e+06	251467	176938	181525	214905	63985	47235.5
	C4ZT56 [455-472]	SEYNVEAVYESVNVATAR		0	2	1000.98	55.7736	11	309.9	46.8	36.9	6.3	2.81493e+06	3.08828e+06	519800	382056	332871	370355	95571.8	37872.9
	C4ZT56 [473-480]	WVECADAK	1xCarbamidomethyl [C4]	0	2	489.721	28.9833	3	312.6	46.3	35.9	5.1	1.1286e+06	1.63187e+06	232828	173832	162268	149748	19922.5	24920.3
	C4ZT56 [488-512]	KNESQLALDGGDNLAYIATSMVNLR		1	3	898.454	67.2678	1	340.9	26.2	22.9	10.1	1135843	1.44506e+06	121353	79840.9	72818.6	101392	42406.3	33838.5
	C4ZT56 [488-512]	KNESQLALDGGDNLAYIATSMVNLR	1xOxidation [M21]	1	3	903.79	57.5535	3	307.5	45.9	41.1	5.6	724177	804458	138636	93454.6	96060.7	108153	13798
	C4ZT56 [489-512]	NESQLALDGGDNLAYIATSMVNLR		0	2	1283.14	72.1683	4	335.2	34.3	23.7	6.8	938050	1.14656e+06	129360	87165.4	70220.3	76451.6	23528.4	19029.1
	C4ZT56 [518-527]	YPDVQFHQTR		0	3	430.878	35.198	9	332.9	37.8	25.3	4	2.84818e+06	2.99978e+06	448801	245872	217992	225698	29502.6	42687.1
	C4ZT56 [57-64]	SDWMEMEK		0	2	528.212	43.1142	1	271.2	11	17.8		193038	319744	11771.5	8612.83	15460.3	17271.5
FALSE	P67087	Ribosomal RNA small subunit methyltransferase I [OS=Escherichia coli K-12]	76	17	17	31.3	6.24	108	60.2	165.3	140.1	34.5	5.60669e+06	6.5376e+06	1.86226e+07	1.48411e+07	1.36422e+07	1.45519e+07	3.50736e+06	3.43602e+06
	Positions in Master Proteins	Sequence	Modifications	# Missed Cleavages	PSM Charge (by Search Engine): Sequest HT	PSM m/z [Da] (by Search Engine): Sequest HT	PSM RT [min] (by Search Engine): Sequest HT	# PSMs	Abundances (Grouped): 1	Abundances (Grouped): 2	Abundances (Grouped): 3	Abundances (Grouped): 4	Abundance: F5: Sample, 1	Abundance: F6: Sample, 1	Abundance: F7: Sample, 2	Abundance: F8: Sample, 2	Abundance: F9: Sample, 3	Abundance: F10: Sample, 3	Abundance: F11: Sample, 4	Abundance: F12: Sample, 4
	P67087 [116-138]	VVPLPGPCAAITALSAAGLPSDR	1xCarbamidomethyl [C8]	0	3	745.072	65.8396	1	61.2	171.2	129.8	37.8	49207.5		146534	129266	89514.1	121724	32090.7	28766.8
	P67087 [158-164]	AIEAEPR		0	2	393.211	23.2803	4	23.9	203.6	141.6	30.9	73338.5	100710	810123	662373	544503	476607	105126	117693
	P67087 [165-174]	TLIFYESTHR		0	3	422.887	41.5333	8	68.3	163.2	135.9	32.6	340782	354139	916725	752966	691934	691869	165858	165607
	P67087 [175-190]	LLDSLEDIVAVLGESR		0	2	864.972	75.9061	14	85.2	144.4	135.1	35.3	533760	626441	1.21994e+06	788235	912935	921237	291754	197298
	P67087 [191-196]	YVVLAR		0	2	360.724	33.0394	6	63	181.9	127	28.2	275219	284232	921813	706472	556663	570142	121905	128133
	P67087 [226-236]	GEMVLIVEGHK		0	2	606.324	40.7703	5	71.7	149.6	152.4	26.4	252359	309942	662770	514252	539902	654981	103430	102269
	P67087 [237-248]	AQEEDLPADALR		0	2	664.328	40.1584	8	68.8	164.5	134.7	32	484962	556139	1404890	1.09797e+06	985674	1049921	237201	246627
	P67087 [249-260]	TLALLQAELPLK		0	2	655.408	60.1405	4	54.8	167.8	144.6	32.8	172251	191359	644425	478955	429679	533956	107748	109261
	P67087 [249-261]	TLALLQAELPLKK		1	3	479.972	52.9481	13	59.5	150.5	148.6	41.3	598125	636626	1.71005e+06	1.42325e+06	1.45997e+06	1.62496e+06	450071	407321
	P67087 [262-273]	AAALAAEIHGVK		0	2	575.832	35.4361	6	57.1	191.9	128.5	22.6	167694	183412	682554	508965	376532	413743	69585.9	69035
	P67087 [262-274]	AAALAAEIHGVKK		1	3	426.922	30.9981	2	68.4	154.8	139.4	37.4	197078	197793	496453	402698	436216	371340	102604	113838
	P67087 [3-30]	QHQSADNSQGQLYIVPTPIGNLADITQR		0	3	1022.19	59.3835	7	67.1	165.2	127.5	40.3	333719	335541	958671	708517	585135	691086	220255	183373
	P67087 [31-47]	ALEVLQAVDLIAAEDTR		0	2	913.996	70.1564	13	78.1	143.2	141.7	37.1	707091	866770	1.88005e+06	1.09624e+06	1.26838e+06	1.59071e+06	378747	365033
	P67087 [48-61]	HTGLLLQHFGINAR		0	3	526.295	46.1934	1	32	190.2	146.6	31.2		316987	2.04155e+06	1.74467e+06	1.42436e+06	1.48581e+06	269836	354500
	P67087 [62-73]	LFALHDHNEQQK		0	3	493.916	29.1852	1	62.6	172.4	134.3	30.8	437527	505067	1.33763e+06	1.2543e+06	1.00589e+06	1.01174e+06	217921	245728
	P67087 [74-80]	AETLLAK		0	2	373.226	29.5063	7	55.5	182.6	136.8	25.2	222658	252442	825408	737709	588702	580512	98148.1	117747
	P67087 [81-107]	LQEGQNIALVSDAGTPLINDPGYHLVR		0	3	964.174	55.8186	8	63.8	153.3	141.7	41.1	760920	819997	1.96305e+06	1.83426e+06	1.74621e+06	1.76157e+06	535078	483795
FALSE	C4ZUH4	Large ribosomal subunit protein uL4 [OS=Escherichia coli BW2952]	55	11	11	22.1	9.73	106	1.5	259.1	120.5	18.8	1.19937e+06	1.6306e+06	2.65131e+08	2.12678e+08	1.08003e+08	1.12884e+08	1.70753e+07	1.74616e+07
	Positions in Master Proteins	Sequence	Modifications	# Missed Cleavages	PSM Charge (by Search Engine): Sequest HT	PSM m/z [Da] (by Search Engine): Sequest HT	PSM RT [min] (by Search Engine): Sequest HT	# PSMs	Abundances (Grouped): 1	Abundances (Grouped): 2	Abundances (Grouped): 3	Abundances (Grouped): 4	Abundance: F5: Sample, 1	Abundance: F6: Sample, 1	Abundance: F7: Sample, 2	Abundance: F8: Sample, 2	Abundance: F9: Sample, 3	Abundance: F10: Sample, 3	Abundance: F11: Sample, 4	Abundance: F12: Sample, 4
	C4ZUH4 [1-6]	MELVLK		0	2	366.719	41.4387	6	0.8	235.4	140	23.8	22252.9		8845361	5479245	4.1223e+06	4156804	697843	712582
	C4ZUH4 [1-6]	MELVLK	1xOxidation [M1]	0	2	374.717	33.4495	6	5.3	273	103.8	17.8	186348	256865	12821086	9969326	4.31808e+06	4.28242e+06	701558	778184
	C4ZUH4 [107-114]	SILSELVR		0	2	458.777	55.9233	6	0.8	264.7	118	16.5	81014.3	100466	32554186	28948884	13097552	14303955	1.83874e+06	1.98611e+06
	C4ZUH4 [118-123]	LIVVEK		0	2	350.733	31.0878	7	2	270.1	113	14.9	128002	199305	24340608	19665096	9123376	9189201	1.08998e+06	1.33165e+06
	C4ZUH4 [124-130]	FSVEAPK		0	2	389.21	33.8884	7	4.4	273.8	107	14.7	262800	379789	21688698	17457606	7.82762e+06	7.38919e+06	971905	1.12421e+06
	C4ZUH4 [171-185]	DATGIDPVSLIAFDK		0	2	781.411	63.5895	9	0.7	256	124.9	18.4	97411.2	96079.7	39484888	28779040	15368633	17606968	2.5173e+06	2.32534e+06
	C4ZUH4 [186-194]	VVMTADAVK		0	2	467.257	30.7423	5		200.9	87.6	11.5			20910794	15803379	7945708	7906249	923966	1173264
	C4ZUH4 [186-194]	VVMTADAVK	1xOxidation [M3]	0	2	475.254	23.841	13	1.4	258.9	118.7	21	56642.4	184746	20877286	17318103	9071689	8.37718e+06	1.35188e+06	1.76502e+06
	C4ZUH4 [22-40]	DFNEALVHQVVVAYAAGAR		0	3	677.355	64.8502	15	1.3	238.2	136	24.5	126520	118043	2.57069e+07	1.98993e+07	1.21726e+07	1.36874e+07	2.68037e+06	2.01991e+06
	C4ZUH4 [48-57]	TRAEVTGSGK		1	2	503.269	17.7258	3	1.5	245.9	129.6	23		24968.8	4.50167e+06	3.94486e+06	2.26663e+06	2.17699e+06	375493	415182
	C4ZUH4 [50-57]	AEVTGSGK		0	2	374.695	17.6812	2		200.1	90	10			1.94695e+06	2230878	904742	970427	93500.6	115193
	C4ZUH4 [7-21]	DAQSALTVSETTFGR		0	2	791.891	47.8451	13	1.3	264.8	115.5	18.3	155456	178038	3.57761e+07	3.08645e+07	1.41824e+07	1.48219e+07	2.37242e+06	2.22126e+06
	C4ZUH4 [80-95]	SGGVTFAARPQDHSQK		0	3	562.617	26.7165	14	1.5	238.9	134.2	25.4	82921.3	92297.5	1.56765e+07	1.23177e+07	7.60143e+06	8015718	1.46032e+06	1.49372e+06
FALSE	C4ZR80	Large ribosomal subunit protein bL9 [OS=Escherichia coli BW2952]	68	11	11	15.8	6.58	99	4.2	175.3	106.2	114.2	3.6905e+06	3.40585e+06	1.60714e+08	1.33225e+08	8.72783e+07	9.00828e+07	9.2438e+07	9.82288e+07
	Positions in Master Proteins	Sequence	Modifications	# Missed Cleavages	PSM Charge (by Search Engine): Sequest HT	PSM m/z [Da] (by Search Engine): Sequest HT	PSM RT [min] (by Search Engine): Sequest HT	# PSMs	Abundances (Grouped): 1	Abundances (Grouped): 2	Abundances (Grouped): 3	Abundances (Grouped): 4	Abundance: F5: Sample, 1	Abundance: F6: Sample, 1	Abundance: F7: Sample, 2	Abundance: F8: Sample, 2	Abundance: F9: Sample, 3	Abundance: F10: Sample, 3	Abundance: F11: Sample, 4	Abundance: F12: Sample, 4
	C4ZR80 [1-8]	MQVILLDK		0	2	480.284	46.9265	7	2.3	154.4	121.1	122.1	83743.6	108391	7.317e+06	5371945	4827278	5.00871e+06	4.89168e+06	5023462
	C4ZR80 [1-8]	MQVILLDK	1xOxidation [M1]	0	2	488.281	40.4202	8	6	188.6	104.4	101.1	225194	250374	8.0641e+06	6920387	4089575	4.17788e+06	3.80528e+06	4.21057e+06
	C4ZR80 [117-123]	LPNGVLR		0	2	384.74	34.3964	4	3.1	191.3	100.8	104.9	119749	124876	8.22514e+06	7034862	3.79826e+06	4.23265e+06	3.91022e+06	4447568
	C4ZR80 [124-141]	TTGEHEVSFQVHSEVFAK		0	3	677.996	40.8257	29	20.6	152.4	108.6	118.4	1.20916e+06	876254	8.23629e+06	7.05411e+06	5.66389e+06	5.20638e+06	5622162	6.23521e+06
	C4ZR80 [42-50]	KNIEFFEAR		1	2	577.304	40.6928	7	3.7	139.5	109.5	147.3	76122.7	81754	3.11489e+06	2.8068e+06	2.10994e+06	2.55172e+06	3.17392e+06	3.07173e+06
	C4ZR80 [43-50]	NIEFFEAR		0	2	513.257	48.8336	4	3	184.9	96.5	115.6	186765	164518	11507891	10294209	5.56217e+06	5.79604e+06	6.7491e+06	6857815
	C4ZR80 [58-68]	LAEVLAAANAR		0	2	549.818	39.0837	5	3.3	181.7	107.2	107.7	395380	484578	26818214	21993112	14400311	14259888	13683930	15150382
	C4ZR80 [72-83]	INALETVTIASK		0	2	630.364	46.2365	9	2.7	178.7	105.9	112.7	359282	376887	26782160	21619816	13939015	14577129	14791094	15559328
	C4ZR80 [9-22]	VANLGSLGDQVNVK		0	2	707.389	43.8862	8	2.7	181	105.8	110.6	294258	348789	23142992	19759852	12513976	12483803	12602391	13549381
	C4ZR80 [90-112]	LFGSIGTRDIADAVTAAGVEVAK		1	3	754.411	61.6352	1	100				258017
	C4ZR80 [90-97]	LFGSIGTR		0	2	425.744	39.7631	2	3.8	180.7	102.5	113	257024	288693	14991750	11474686	7516531	7365035	8027331	8372196
	C4ZR80 [98-112]	DIADAVTAAGVEVAK		0	2	715.38	51.6772	15	2.1	165.1	109	123.8	225808	300742	2.25132e+07	1.88953e+07	1.28573e+07	1.44236e+07	1.51809e+07	1.57512e+07
FALSE	P0A7K2	Large ribosomal subunit protein bL12 [OS=Escherichia coli K-12]	82	11	11	12.3	4.65	91	59.6	187.2	95.2	58.1	3.29479e+07	3.79477e+07	1.22941e+08	1.00374e+08	5.45998e+07	5.84537e+07	3.28981e+07	3.60817e+07
	Positions in Master Proteins	Sequence	Modifications	# Missed Cleavages	PSM Charge (by Search Engine): Sequest HT	PSM m/z [Da] (by Search Engine): Sequest HT	PSM RT [min] (by Search Engine): Sequest HT	# PSMs	Abundances (Grouped): 1	Abundances (Grouped): 2	Abundances (Grouped): 3	Abundances (Grouped): 4	Abundance: F5: Sample, 1	Abundance: F6: Sample, 1	Abundance: F7: Sample, 2	Abundance: F8: Sample, 2	Abundance: F9: Sample, 3	Abundance: F10: Sample, 3	Abundance: F11: Sample, 4	Abundance: F12: Sample, 4
	P0A7K2 [102-108]	DDAEALK		0	2	381.187	23.1374	6	13.3	232.4	108.8	45.5	111612	143450	2345369	2.07274e+06	1.06704e+06	998409	400054	465465
	P0A7K2 [102-109]	DDAEALKK		1	2	445.234	20.425	1	16	224.6	114.4	45	898661	1356601	16502591	14638764	7620807	8.23019e+06	2767332	3.50752e+06
	P0A7K2 [109-121]	KALEEAGAEVEVK		1	3	458.249	32.1299	17	60	164.9	108.6	66.5	1.447e+06	1.97852e+06	5.07402e+06	4.25483e+06	2.95272e+06	3.17292e+06	1.8596e+06	1.88566e+06
	P0A7K2 [110-121]	ALEEAGAEVEVK		0	2	622.823	35.3493	9	69.3	175.4	91.5	63.8	8272153	9158057	24988852	19409896	11282725	11685032	7.73454e+06	8.29401e+06
	P0A7K2 [31-52]	FGVSAAAAVAVAAGPVEAAEEK		0	3	672.353	58.7991	20	50.7	204.1	106.4	38.7	638398	544101	2.47644e+06	2.26943e+06	1.0915e+06	1.40061e+06	527315	383446
	P0A7K2 [53-60]	TEFDVILK		0	2	482.772	49.0506	4	33.3	255.3	80.4	31	2914559	2.99166e+06	24900654	20533972	6855892	7396987	2.7523e+06	2.7361e+06
	P0A7K2 [6-30]	DQIIEAVAAMSVMDVVELISAMEEK	2xOxidation [M10; M13]	0	3	918.452	90.2742	6	9.1		190.9			3841.21				80951.3
	P0A7K2 [6-30]	DQIIEAVAAMSVMDVVELISAMEEK	3xOxidation [M10; M13; M22]	0	3	923.785	90.2699	1	134.6	59.9		105.5	15707.2	30467.3		9731.44			19481.3	15090.6
	P0A7K2 [75-82]	GATGLGLK		0	2	358.718	29.8402	4	67.1	176.2	96.1	60.6	2.82217e+06	3.2899e+06	8613612	7423159	4.22154e+06	4.51087e+06	2.44495e+06	3.09423e+06
	P0A7K2 [86-96]	DLVESAPAALK		0	2	557.311	41.9864	11	71.2	178.3	93.6	56.9	12323141	14636417	38039812	29761558	16818140	18527700	10466770	11024435
	P0A7K2 [97-108]	EGVSKDDAEALK		1	3	421.214	27.6066	7	101.1		87.8	111	608402	693501			605246	525874	637709	797519
	P0A7K2 [97-109]	EGVSKDDAEALKK		2	3	463.912	24.6948	5	105.1		70	124.9	2.89614e+06	3.1212e+06			2.08423e+06	1.92412e+06	3.288e+06	3.87824e+06
FALSE	P0A7V8	Small ribosomal subunit protein uS4 [OS=Escherichia coli K-12]	59	14	14	23.5	10.05	91	30.5	223.4	106.3	39.9	5.18777e+06	5.51212e+06	4.41624e+07	3.48192e+07	1.77453e+07	1.96205e+07	6.9798e+06	7.03063e+06
	Positions in Master Proteins	Sequence	Modifications	# Missed Cleavages	PSM Charge (by Search Engine): Sequest HT	PSM m/z [Da] (by Search Engine): Sequest HT	PSM RT [min] (by Search Engine): Sequest HT	# PSMs	Abundances (Grouped): 1	Abundances (Grouped): 2	Abundances (Grouped): 3	Abundances (Grouped): 4	Abundance: F5: Sample, 1	Abundance: F6: Sample, 1	Abundance: F7: Sample, 2	Abundance: F8: Sample, 2	Abundance: F9: Sample, 3	Abundance: F10: Sample, 3	Abundance: F11: Sample, 4	Abundance: F12: Sample, 4
	P0A7V8 [105-111]	MGFGATR	1xOxidation [M1]	0	2	378.179	24.5988	3	3.3	239.8	119.5	37.4	7475.66	19261.9	966880	767266	451032	408403	123846	145379
	P0A7V8 [116-121]	QLVSHK		0	2	356.21	18.0769	2		193	88.3	18.7			950105	766684	394047	387178	80553.5	84621.7
	P0A7V8 [122-128]	AIMVNGR		0	2	380.71	26.754	3		194.5	81.6	23.9			476835	350961	161791	181830	45579.7	55488.6
	P0A7V8 [129-146]	VVNIASYQVSPNDVVSIR		0	2	980.53	53.8461	6	2.9	259.1	106	32.1	35272.8		3.50907e+06	2.87788e+06	1.19409e+06	1.41529e+06	393492	392784
	P0A7V8 [157-165]	AALELAEQR		0	2	500.775	35.3194	8	7.9	262.1	101.7	28.3	206486	292568	9412664	7.10302e+06	3.16776e+06	3178359	855310	908965
	P0A7V8 [178-183]	MEGTFK	1xOxidation [M1]	0	2	364.668	21.7634	4	4.9	253.3	106.7	35.1	24612.5	28045.7	1.47999e+06	1.27134e+06	638263	523133	180527	200185
	P0A7V8 [189-206]	SDLSADINEHLIVELYSK		0	3	682.685	60.7551	21	165.4	62.8	79.3	92.5	4.34905e+06	4.48138e+06	2.16384e+06	1.29837e+06	1.48067e+06	3.02503e+06	2.69776e+06	2.25802e+06
	P0A7V8 [34-44]	IEQAPGQHGAR		0	3	388.535	20.1879	18	2.1	262	107	29	17016.8	43928.7	3.83679e+06	3.15995e+06	1.41611e+06	1.42661e+06	353650	418709
	P0A7V8 [48-56]	LSDYGVQLR		0	2	525.782	40.7365	3	5.9	236.1	125.5	32.4	152051	187776	7468481	6.04481e+06	3.60458e+06	3.54059e+06	813461	1.04619e+06
	P0A7V8 [63-70]	RIYGVLER		1	2	503.296	34.2299	1	6.9	248.9	112.3	31.9	64889.3	63471.4	2633600	2031321	1.01947e+06	1.06854e+06	292117	301779
	P0A7V8 [64-70]	IYGVLER		0	2	425.245	38.818	4	11.5	244.1	113.7	30.8	89107.3	102133	2.30842e+06	1.78147e+06	940741	947902	252368	258770
	P0A7V8 [82-97]	LKGNTGENLLALLEGR		1	2	849.481	61.8131	8	7.6	230.7	124.9	36.9	88774.2	82243.1	2.91407e+06	2.3356e+06	1290225	1.54582e+06	412810	421399
	P0A7V8 [84-97]	GNTGENLLALLEGR		0	2	728.892	66.5498	5	6.2	298.3	76.6	18.8	34505.9	32206.7	1.67267e+06	1.53744e+06	393433	431379	101775	100890
	P0A7V8 [98-104]	LDNVVYR		0	2	439.741	32.2748	5	9.7	259.4	104	26.9	118531	179109	4368977	3.49312e+06	1.59311e+06	1.54048e+06	376550	437443
FALSE	B1XHK3	Small ribosomal subunit protein uS9 [OS=Escherichia coli str. K-12 substr. DH10B]	65	10	10	14.8	10.95	89	5.3	272.3	102.7	19.6	1.66988e+06	2.11579e+06	1.06247e+08	8.76394e+07	3.40314e+07	3.8934e+07	6.78272e+06	7.1198e+06
	Positions in Master Proteins	Sequence	Modifications	# Missed Cleavages	PSM Charge (by Search Engine): Sequest HT	PSM m/z [Da] (by Search Engine): Sequest HT	PSM RT [min] (by Search Engine): Sequest HT	# PSMs	Abundances (Grouped): 1	Abundances (Grouped): 2	Abundances (Grouped): 3	Abundances (Grouped): 4	Abundance: F5: Sample, 1	Abundance: F6: Sample, 1	Abundance: F7: Sample, 2	Abundance: F8: Sample, 2	Abundance: F9: Sample, 3	Abundance: F10: Sample, 3	Abundance: F11: Sample, 4	Abundance: F12: Sample, 4
	B1XHK3 [101-106]	AGFVTR		0	2	325.685	26.4542	6	3.6	277.6	100	18.7	48502.6	83731.5	5322223	4.4585e+06	1.7964e+06	1.71447e+06	299903	360698
	B1XHK3 [19-27]	VFIKPGNGK		0	3	320.528	25.042	7	8.2	274.5	100.7	16.6	118469	151867	4960344	4.06099e+06	1658785	1.63464e+06	239158	309430
	B1XHK3 [2-11]	AENQYYGTGR		0	2	579.763	27.0648	6	2.8	282.5	97	17.7	72785.8	132914	11621997	8.36597e+06	3.42339e+06	3.34695e+06	553711	691747
	B1XHK3 [28-33]	IVINQR		0	2	371.731	26.4479	6	2.7	295.5	86.2	15.6	89581.3	169449	14396275	12757839	4.04305e+06	3.86514e+06	656336	783841
	B1XHK3 [34-41]	SLEQYFGR		0	2	500.248	46.7452	10	6.7	260.7	109.6	23	347359	420265	17265454	12977756	5958188	6641321	1.33661e+06	1306550
	B1XHK3 [50-60]	QPLELVDMVEK		0	2	650.845	54.1129	6	3.8	281.7	98.8	15.7	121688	133141	10134295	8872969	3.04064e+06	3.63811e+06	540105	515628
	B1XHK3 [50-60]	QPLELVDMVEK	1xOxidation [M8]	0	2	658.843	46.5526	8	4.8	280.7	99.8	14.7	195388	248892	1.38894e+07	1.18395e+07	4.41357e+06	4.71069e+06	654335	689838
	B1XHK3 [61-68]	LDLYITVK		0	2	482.789	50.5683	14	10.7	221.9	130.8	36.7	309511	321052	6.07022e+06	7.03367e+06	2.66787e+06	5.55807e+06	1.11508e+06	1.04559e+06
	B1XHK3 [69-80]	GGGISGQAGAIR		0	2	522.284	29.5244	4
	B1XHK3 [86-95]	ALMEYDESLR		0	2	613.79	43.36	6	5.1	270	104	20.8	78135	98613.8	5269484	4.13916e+06	1.76185e+06	1.83726e+06	364518	356684
	B1XHK3 [86-95]	ALMEYDESLR	1xOxidation [M3]	0	2	621.787	37.7666	14	5.9	274.2	101.5	18.5	288457	355864	17154176	13009201	5.18045e+06	5.90094e+06	990139	1.02659e+06
	B1XHK3 [86-99]	ALMEYDESLRSELR	1xOxidation [M3]	1	3	576.614	43.5245	2		162.8	99.4	37.8			163346	123832	87219.8	86399.4	32829.7	33196.9
FALSE	C4ZUG9	Small ribosomal subunit protein uS3 [OS=Escherichia coli BW2952]	65	14	14	26	10.27	89	7.4	266.7	105.6	20.4	2.38552e+06	2.68062e+06	1.00872e+08	8.34136e+07	3.57903e+07	3.68382e+07	6.8714e+06	7.15101e+06
	Positions in Master Proteins	Sequence	Modifications	# Missed Cleavages	PSM Charge (by Search Engine): Sequest HT	PSM m/z [Da] (by Search Engine): Sequest HT	PSM RT [min] (by Search Engine): Sequest HT	# PSMs	Abundances (Grouped): 1	Abundances (Grouped): 2	Abundances (Grouped): 3	Abundances (Grouped): 4	Abundance: F5: Sample, 1	Abundance: F6: Sample, 1	Abundance: F7: Sample, 2	Abundance: F8: Sample, 2	Abundance: F9: Sample, 3	Abundance: F10: Sample, 3	Abundance: F11: Sample, 4	Abundance: F12: Sample, 4
	C4ZUG9 [108-114]	KPELDAK		0	2	400.729	20.0323	1	2.5	274.8	104.2	18.5	27595.3	47776.7	4.09635e+06	3774256	1468946	1514296	236611	294828
	C4ZUG9 [115-126]	LVADSITSQLER		0	2	666.362	46.3237	8	6.2	271.9	103.5	18.4	451623	510229	22585802	19490340	8.01212e+06	7961579	1.37301e+06	1.46928e+06
	C4ZUG9 [12-27]	LGIVKPWNSTWFANTK		0	3	621.337	55.8235	3	12.5	238.7	116.3	32.5	121582	100690	2.36159e+06	1.89124e+06	981138	1.08049e+06	329063	251650
	C4ZUG9 [136-143]	RAVQNAMR		1	2	473.256	19.8232	1	1.6	278.7	103.7	16.1	8247.15		1.63191e+06	1.30425e+06	507548	580907	70918.4	99741.6
	C4ZUG9 [137-143]	AVQNAMR		0	2	395.206	21.4576	4		217.4	71.9	10.7			1.62369e+06	1403502	528499	471255	64133.1	85724.9
	C4ZUG9 [157-164]	LGGAEIAR		0	2	393.727	27.8057	6	8.3	257.4	113	21.4	171954	321350	8571906	6245873	3342854	3.0856e+06	554802	665041
	C4ZUG9 [173-179]	VPLHTLR		0	2	418.261	27.0551	3	8.5	280.3	94.3	16.9	136408	140513	4.53166e+06	4.60501e+06	1.57686e+06	1.49769e+06	263674	288271
	C4ZUG9 [180-199]	ADIDYNTSEAHTTYGVIGVK		0	3	718.684	43.6557	9	9.6	263.1	105.7	21.6	457194	411764	1.32165e+07	1.06634e+07	4.73342e+06	4.8067e+06	996133	949281
	C4ZUG9 [205-225]	GEILGGMAAVEQPEKPAAQPK		0	3	707.704	42.8378	6	6.7	276.8	101.2	15.3	78487	88464.3	3994877	2.99482e+06	1.22962e+06	1.30078e+06	189270	192268
	C4ZUG9 [205-225]	GEILGGMAAVEQPEKPAAQPK	1xOxidation [M7]	0	3	713.035	35.9864	9	9.2	282.9	90.6	17.3	172561	226079	6882143	5.35329e+06	1.9358e+06	1950000	361433	383196
	C4ZUG9 [28-38]	EFADNLDSDFK		0	2	650.789	47.0458	6	9.5	252.4	115.4	22.7	347880	384427	10278800	9243614	4231711	4.69475e+06	863652	892596
	C4ZUG9 [55-62]	IVIERPAK		0	2	463.295	27.5533	1	9.1	275.9	98.2	16.9	68877.6	80459.8	2.41355e+06	2.13223e+06	791323	824466	131955	145792
	C4ZUG9 [66-79]	VTIHTARPGIVIGK		0	3	487.968	35.6968	17	8.1	269.1	97.4	25.4	121874	118435	4.57652e+06	3447777	1.44607e+06	1.42863e+06	332086	423485
	C4ZUG9 [89-107]	KVVADIAGVPAQINIAEVR		1	3	655.049	51.9937	5		145.1	126.3	28.6			1.99213e+06	1.7202e+06	1.43562e+06	1.81033e+06	387443	344412
	C4ZUG9 [90-107]	VVADIAGVPAQINIAEVR		0	2	918.024	56.4081	10	6.2	277.9	97.6	18.2	221240	250433	1.21148e+07	9143849	3.56876e+06	3.8307e+06	717214	665441
FALSE	P0A7D1	Peptidyl-tRNA hydrolase [OS=Escherichia coli K-12]	71	11	11	21.1	9	83	198	119	63.9	19.2	4.24728e+07	4.73985e+07	3.00389e+07	2.42062e+07	1.41736e+07	1.47791e+07	4.31911e+06	4.38863e+06
	Positions in Master Proteins	Sequence	Modifications	# Missed Cleavages	PSM Charge (by Search Engine): Sequest HT	PSM m/z [Da] (by Search Engine): Sequest HT	PSM RT [min] (by Search Engine): Sequest HT	# PSMs	Abundances (Grouped): 1	Abundances (Grouped): 2	Abundances (Grouped): 3	Abundances (Grouped): 4	Abundance: F5: Sample, 1	Abundance: F6: Sample, 1	Abundance: F7: Sample, 2	Abundance: F8: Sample, 2	Abundance: F9: Sample, 3	Abundance: F10: Sample, 3	Abundance: F11: Sample, 4	Abundance: F12: Sample, 4
	P0A7D1 [124-132]	LGNNPNFHR		0	2	534.771	25.8102	1	220.4	106.6	58	15	711343	707286	364048	323118	210488	165519	44264.6	52314.1
	P0A7D1 [146-160]	VVGFVLGKPPVSEQK		0	3	528.643	44.5406	13	202.8	116.4	62.4	18.5	6.25243e+06	6.45633e+06	3.85835e+06	3.44432e+06	2.03243e+06	1.87841e+06	551018	607905
	P0A7D1 [161-171]	LIDEAIDEAAR		0	2	608.313	41.39	7	190.3	129.4	62.6	17.8	7990443	9490950	6.64102e+06	5277561	2.81998e+06	2906677	847142	784981
	P0A7D1 [172-183]	CTEMWFTDGLTK	1xCarbamidomethyl [C1]	0	2	744.828	56.2123	2	249.6	76	60	14.4	321078	379026	107136	105203	90109.5	78062.7	20093.7
	P0A7D1 [172-183]	CTEMWFTDGLTK	1xCarbamidomethyl [C1]; 1xOxidation [M4]	0	2	752.827	51.6989	7	211.8	105.4	66.4	16.5	664668	731830	375080	321187	195654	244356	45865.3	64098
	P0A7D1 [21-34]	HNAGAWFVDLLAER		0	3	533.608	63.8219	5	195.6	136	45.1	23.3	274070	332797	255005	172948	64258.9	75565	44413.6	29275.7
	P0A7D1 [45-51]	FFGYTSR		0	2	439.214	40.807	3	215.6	105.3	60.6	18.4	2.88104e+06	3290459	1.76131e+06	1.28494e+06	846218	886251	248412	277711
	P0A7D1 [5-20]	LIVGLANPGAEYAATR		0	2	808.445	49.5211	8	199	116.1	64.2	20.6	5.65633e+06	5.83188e+06	3.80241e+06	2.95365e+06	1.81012e+06	1.89764e+06	623283	568399
	P0A7D1 [52-60]	VTLGGEDVR		0	2	473.254	33.1666	8	192.2	128.1	61.7	18.1	4953285	5629605	4015923	3.08381e+06	1.76411e+06	1.62797e+06	462223	532912
	P0A7D1 [61-73]	LLVPTTFMNLSGK		0	2	710.897	60.1831	7	213	101.9	65.1	19.9	2.33788e+06	2.80813e+06	1.28778e+06	1.16718e+06	739862	828816	231709	248161
	P0A7D1 [61-73]	LLVPTTFMNLSGK	1xOxidation [M8]	0	2	718.894	53.6474	5	186.7	119.6	71.4	22.3	4.05404e+06	4.54794e+06	3.04122e+06	2.48597e+06	1.48572e+06	1.814e+06	519386	504847
	P0A7D1 [74-83]	AVAAMASFFR		0	2	535.777	54.4855	3	215	103.8	63	18.1	2.08693e+06	2.29106e+06	1.15631e+06	964528	584360	702696	177447	191493
	P0A7D1 [74-83]	AVAAMASFFR	1xOxidation [M5]	0	2	543.774	43.3233	7	190.8	123.4	65.6	20.3	2.48419e+06	2886748	1.92452e+06	1.55848e+06	909440	933314	265304	304825
	P0A7D1 [84-104]	INPDEILVAHDELDLPPGVAK		0	3	752.403	57.1295	7	188.1	122.4	66.8	22.7	1.8051e+06	2.01443e+06	1.44875e+06	1.06327e+06	620859	739775	238546	221704
FALSE	P0A7J3	Large ribosomal subunit protein uL10 [OS=Escherichia coli K-12]	64	10	10	17.7	8.98	82	31.4	212.9	102.3	53.4	9.02966e+06	1.02197e+07	7.18702e+07	5.88974e+07	3.008e+07	3.24869e+07	1.57354e+07	1.69488e+07
	Positions in Master Proteins	Sequence	Modifications	# Missed Cleavages	PSM Charge (by Search Engine): Sequest HT	PSM m/z [Da] (by Search Engine): Sequest HT	PSM RT [min] (by Search Engine): Sequest HT	# PSMs	Abundances (Grouped): 1	Abundances (Grouped): 2	Abundances (Grouped): 3	Abundances (Grouped): 4	Abundance: F5: Sample, 1	Abundance: F6: Sample, 1	Abundance: F7: Sample, 2	Abundance: F8: Sample, 2	Abundance: F9: Sample, 3	Abundance: F10: Sample, 3	Abundance: F11: Sample, 4	Abundance: F12: Sample, 4
	P0A7J3 [110-125]	AAAFEGELIPASQIDR		0	2	844.437	51.2279	6	34	191.8	111.9	62.3	1.69279e+06	2.00508e+06	1.12785e+07	9.56251e+06	5.53029e+06	6.6443e+06	3.35626e+06	3.39205e+06
	P0A7J3 [126-138]	LATLPTYEEAIAR		0	2	724.393	49.7663	13	31.4	210.3	99.5	58.8	1.15128e+06	1.16104e+06	8761383	6841839	3.52424e+06	3.80512e+06	2.18688e+06	2.14344e+06
	P0A7J3 [139-144]	LMATMK		0	2	347.685	27.561	4	36	201.2	99.9	63	63138.5	130275	616415	417875	258618	245349	144602	174705
	P0A7J3 [2-8]	ALNLQDK		0	2	401.227	28.9444	8	26.9	237.6	92.3	43.2	585388	821757	6861049	5467895	2.39625e+06	2359800	1.01159e+06	1224002
	P0A7J3 [21-31]	GALSAVVADSR		0	2	523.286	38.9509	3	32.6	212.4	101.4	53.7	2.02788e+06	2.27695e+06	15206338	12919721	6.43423e+06	6.9583e+06	3426826	3.66946e+06
	P0A7J3 [47-53]	EAGVYMR		0	2	413.2	28.9617	4	30.4	228	93.2	48.4	140609	224455	1.60124e+06	1.1099e+06	542434	547605	251683	318833
	P0A7J3 [47-53]	EAGVYMR	1xOxidation [M6]	0	2	421.197	23.2772	1	27.8		171.5	100.6	88710.8	91311.5				555004	311907	339844
	P0A7J3 [62-73]	RAVEGTPFECLK	1xCarbamidomethyl [C10]	1	3	469.574	39.704	7	23.8	242.4	96	37.8	186007	194631	2.30625e+06	1.63321e+06	757403	780378	273452	335471
	P0A7J3 [63-73]	AVEGTPFECLK	1xCarbamidomethyl [C9]	0	2	625.809	44.7731	7	25.3	238.4	98.4	37.9	538150	569419	5.68378e+06	4.79733e+06	2.19503e+06	2.1153e+06	794705	869396
	P0A7J3 [74-94]	DAFVGPTLIAYSMEHPGAAAR		0	3	725.36	60.2671	10	39	183.5	114.3	63.1	164666	197827	992506	725262	493350	566360	276942	307095
	P0A7J3 [74-94]	DAFVGPTLIAYSMEHPGAAAR	1xOxidation [M13]	0	3	730.693	53.2313	8	30.2	206.3	108	55.5	254398	274538	2.08417e+06	1.56182e+06	941776	947960	479584	490385
	P0A7J3 [9-20]	QAIVAEVSEVAK		0	2	622.349	44.4385	11	31.8	217.9	100.7	49.7	2.13664e+06	2.27243e+06	1.64786e+07	1.38601e+07	7.00638e+06	6.96145e+06	3.22096e+06	3.68408e+06
FALSE	P0A7S9	Small ribosomal subunit protein uS13 [OS=Escherichia coli K-12]	67	9	9	13.1	10.78	81	13.4	254.7	104.8	27.2	4.17476e+06	4.49412e+06	8.85827e+07	7.62979e+07	3.3799e+07	3.38382e+07	8.76798e+06	8.76492e+06
	Positions in Master Proteins	Sequence	Modifications	# Missed Cleavages	PSM Charge (by Search Engine): Sequest HT	PSM m/z [Da] (by Search Engine): Sequest HT	PSM RT [min] (by Search Engine): Sequest HT	# PSMs	Abundances (Grouped): 1	Abundances (Grouped): 2	Abundances (Grouped): 3	Abundances (Grouped): 4	Abundance: F5: Sample, 1	Abundance: F6: Sample, 1	Abundance: F7: Sample, 2	Abundance: F8: Sample, 2	Abundance: F9: Sample, 3	Abundance: F10: Sample, 3	Abundance: F11: Sample, 4	Abundance: F12: Sample, 4
	P0A7S9 [14-27]	HAVIALTSIYGVGK		0	2	714.914	48.5417	15	10.8	253.8	108	27.4	483744	521696	11627425	1.19172e+07	5226935	4.80189e+06	1325463	1.21783e+06
	P0A7S9 [32-44]	AILAAAGIAEDVK		0	2	621.361	47.8896	8	15.8	251.1	105.3	27.8	1250144	1.37543e+06	22644900	19295974	8773471	8756716	2.40633e+06	2.22962e+06
	P0A7S9 [4-13]	IAGINIPDHK		0	2	539.306	38.108	7	13.8	256.8	105.6	23.8	290820	345263	6.39462e+06	5.41356e+06	2.41428e+06	2425460	527286	563337
	P0A7S9 [45-57]	ISELSEGQIDTLR		0	2	730.883	44.612	4	13.2	262.8	102.2	21.8	39879.3	43499	906481	757295	323895	320192	62016.4	76270.8
	P0A7S9 [45-62]	ISELSEGQIDTLRDEVAK		1	2	1002.02	49.8135	11	12.3	252.8	105.7	29.2	955586	866178	2.01532e+07	1.73552e+07	7.55077e+06	8.09215e+06	2.1503e+06	2.16944e+06
	P0A7S9 [63-70]	FVVEGDLR		0	2	467.754	39.9966	8	13.5	270	94.8	21.7	489630	544736	11260016	9519216	3655097	3614897	807093	855037
	P0A7S9 [63-71]	FVVEGDLRR		1	3	364.204	35.3116	5	18.3	245.5	97.4	38.8	136969	154526	2.2495e+06	1.68696e+06	823882	724274	295267	320671
	P0A7S9 [72-78]	EISMSIK		0	2	404.218	36.3965	10	12.7	266.3	98.7	22.2	108273	135598	2999758	2.15669e+06	901730	986326	191129	236059
	P0A7S9 [72-78]	EISMSIK	1xOxidation [M4]	0	2	412.215	25.3813	4	6.3	267	100.3	26.5	53636.9	102819	3.4815e+06	2.87456e+06	1.23088e+06	1.14776e+06	282822	347460
	P0A7S9 [80-87]	LMDLGCYR	1xCarbamidomethyl [C6]	0	2	514.238	43.9543	4	15.7	239.3	116.3	28.7	124924	133424	2.11939e+06	1825549	957613	954135	217506	256571
	P0A7S9 [80-87]	LMDLGCYR	1xOxidation [M2]; 1xCarbamidomethyl [C6]	0	2	522.237	36.6978	5	15	239.5	116.2	29.3	241153	270952	4.74593e+06	3.49572e+06	1940429	2.01442e+06	502764	492627
FALSE	C4ZRR1	Small ribosomal subunit protein uS2 [OS=Escherichia coli BW2952]	61	12	12	26.7	7.14	81	134.8	157.7	75.9	31.6	1.95554e+07	2.1613e+07	2.68555e+07	2.15334e+07	1.14823e+07	1.1655e+07	4.72463e+06	4.92938e+06
	Positions in Master Proteins	Sequence	Modifications	# Missed Cleavages	PSM Charge (by Search Engine): Sequest HT	PSM m/z [Da] (by Search Engine): Sequest HT	PSM RT [min] (by Search Engine): Sequest HT	# PSMs	Abundances (Grouped): 1	Abundances (Grouped): 2	Abundances (Grouped): 3	Abundances (Grouped): 4	Abundance: F5: Sample, 1	Abundance: F6: Sample, 1	Abundance: F7: Sample, 2	Abundance: F8: Sample, 2	Abundance: F9: Sample, 3	Abundance: F10: Sample, 3	Abundance: F11: Sample, 4	Abundance: F12: Sample, 4
	C4ZRR1 [114-128]	LKDLETQSQDGTFDK		1	2	862.922	34.0518	9	155.8	140.6	73.9	29.6	3.072e+06	3.42066e+06	3.25032e+06	2.63202e+06	1.63231e+06	1.4473e+06	568506	668828
	C4ZRR1 [116-128]	DLETQSQDGTFDK		0	2	742.331	35.1779	5	107.3	209.3	53.3	30.1	630988	687747	1.49565e+06	1.10426e+06	335927	318608	177286	192508
	C4ZRR1 [144-152]	LENSLGGIK		0	2	465.766	34.3827	7	143	159.2	70.3	27.5	3.64167e+06	4.11544e+06	4717457	3.93568e+06	1.92871e+06	1.87992e+06	692677	798974
	C4ZRR1 [175-208]	EANNLGIPVFAIVDTNSDPDGVDFVIPGNDDAIR		0	3	1190.59	72.8227	2	109.3	161.3	83.6	45.7	156501	133394	228578	198829	103742	117627	59012.1	61837.8
	C4ZRR1 [2-7]	ATVSMR		0	2	332.676	22.787	3	62.9	222.5	85	29.7	113911	191635	584135	468137	194618	205155	63163.9	77131
	C4ZRR1 [209-222]	AVTLYLGAVAATVR		0	2	702.915	57.3843	9	64	170.4	110.8	54.8	882241	992018	2.76558e+06	2.24262e+06	1.55297e+06	1.69062e+06	838031	766411
	C4ZRR1 [226-241]	SQDLASQAEESFVEAE		0	2	870.385	56.8316	7	67.4	193.3	93.2	46	235547	267691	816637	634499	325060	370120	173898	168906
	C4ZRR1 [27-35]	MKPFIFGAR		0	2	533.797	45.2752	2	180.9	97.8	89.2	32.1	355404	415213	256304	168232	183601	195344	64254.5	72374.5
	C4ZRR1 [38-45]	VHIINLEK		0	2	483.293	35.7786	9	145.9	163.1	65.1	25.9	4.1526e+06	4.60039e+06	5.49131e+06	4.34467e+06	1.89255e+06	2.0056e+06	738855	815583
	C4ZRR1 [46-59]	TVPMFNEALAELNK		0	2	788.905	61.3927	5	181.5	109.2	75.8	33.5	885341	998384	672275	476043	381664	404372	210844	142634
	C4ZRR1 [46-59]	TVPMFNEALAELNK	1xOxidation [M4]	0	2	796.903	55.0394	7	139.4	156.4	73.6	30.7	2.26442e+06	2.45962e+06	2.86024e+06	2.45122e+06	1.16675e+06	1.33202e+06	541729	497779
	C4ZRR1 [67-74]	ILFVGTKR		1	2	467.298	35.6683	2	194.6	99	66.1	40.3	359781	330981	188644	163537	114495	119987	69684.4	73461.7
	C4ZRR1 [82-95]	DAALSCDQFFVNHR	1xCarbamidomethyl [C6]	0	2	840.382	46.1315	14	142	151.5	79.2	27.4	2.80497e+06	2.99985e+06	3.52837e+06	2.71365e+06	1.66992e+06	1.56835e+06	526690	592954
FALSE	P0A7W1	Small ribosomal subunit protein uS5 [OS=Escherichia coli K-12]	75	10	10	17.6	10.11	77	10.1	218.6	98.4	72.9	1.05967e+06	1.07953e+06	2.58158e+07	2.08202e+07	1.04054e+07	1.04748e+07	7.54607e+06	7.93054e+06
	Positions in Master Proteins	Sequence	Modifications	# Missed Cleavages	PSM Charge (by Search Engine): Sequest HT	PSM m/z [Da] (by Search Engine): Sequest HT	PSM RT [min] (by Search Engine): Sequest HT	# PSMs	Abundances (Grouped): 1	Abundances (Grouped): 2	Abundances (Grouped): 3	Abundances (Grouped): 4	Abundance: F5: Sample, 1	Abundance: F6: Sample, 1	Abundance: F7: Sample, 2	Abundance: F8: Sample, 2	Abundance: F9: Sample, 3	Abundance: F10: Sample, 3	Abundance: F11: Sample, 4	Abundance: F12: Sample, 4
	P0A7W1 [113-126]	AVLEVAGVHNVLAK		0	2	710.419	44.5487	17	5.9	205.8	109.1	79.2	186560	124340	5.80196e+06	4.80581e+06	2851348	2.74881e+06	1.99469e+06	2068389
	P0A7W1 [127-138]	AYGSTNPINVVR		0	2	645.845	39.8158	8	11.9	204.8	106.7	76.6	177680	218749	3.9266e+06	2.91184e+06	1.74238e+06	1.78222e+06	1.2047e+06	1.32664e+06
	P0A7W1 [139-156]	ATIDGLENMNSPEMVAAK	2xOxidation [M9; M14]	0	2	961.946	39.0946	5	10.2	218.6	95.2	76.1	25289.6	21060.4	589414	415331	209799	221279	165681	178944
	P0A7W1 [15-20]	LIAVNR		0	2	343.222	28.2267	2	13.5	219.9	96.3	70.3	85530.7	125001	1.82852e+06	1.54941e+06	753751	721080	476201	608711
	P0A7W1 [160-167]	SVEEILGK		0	2	437.747	39.4793	4	11.5	188.5			172813		3.12308e+06	2.58326e+06
	P0A7W1 [30-45]	IFSFTALTVVGDGNGR		0	2	827.433	61.3004	7	11.6	168.7	120.9	98.8	109158	97753	1.5702e+06	1.4453e+06	1.02591e+06	1.13613e+06	1.01169e+06	769493
	P0A7W1 [46-52]	VGFGYGK		0	2	364.192	33.2845	9	18.2	201	104.1	76.6	105454	137729	1.65546e+06	1.07093e+06	691983	687578	492004	523269
	P0A7W1 [55-62]	EVPAAIQK		0	2	428.25	27.0286	1	11	219.8	97.9	71.3		86874.1	1.78682e+06	1.6748e+06	803638	739144	513468	612700
	P0A7W1 [70-86]	NMINVALNNGTLQHPVK		0	3	621.669	47.1373	5	8	201.1	108.8	82.1	36075.3	30601.6	859209	805004	451696	448445	324880	355138
	P0A7W1 [70-86]	NMINVALNNGTLQHPVK	1xOxidation [M2]	0	3	627.001	40.4507	4	7.5	203.8	109.4	79.3	36460.1	50468.7	1.28889e+06	1.0642e+06	595327	664011	426522	486950
	P0A7W1 [94-112]	VFMQPASEGTGIIAGGAMR		0	2	946.972	50.7847	3		128.2	96.9	74.8			265522	147673	138690	161486	110216	121173
	P0A7W1 [94-112]	VFMQPASEGTGIIAGGAMR	1xOxidation [M]	0	2	954.968	46.2257	5		158	78.3	63.7			613537	447800	250687	269284	206047	216827
	P0A7W1 [94-112]	VFMQPASEGTGIIAGGAMR	2xOxidation [M3; M18]	0	3	642.314	41.9067	7	15.8	225.6	92.3	66.3	124646	186957	2.50656e+06	1.89881e+06	890247	895323	619967	662302
FALSE	P42641	GTPase ObgE/CgtA [OS=Escherichia coli K-12]	53	16	16	43.3	4.88	75		236.7	1.9	61.5			6.4339e+07	5.19723e+07	641942	328761	1.44096e+07	1.56451e+07
	Positions in Master Proteins	Sequence	Modifications	# Missed Cleavages	PSM Charge (by Search Engine): Sequest HT	PSM m/z [Da] (by Search Engine): Sequest HT	PSM RT [min] (by Search Engine): Sequest HT	# PSMs	Abundances (Grouped): 1	Abundances (Grouped): 2	Abundances (Grouped): 3	Abundances (Grouped): 4	Abundance: F5: Sample, 1	Abundance: F6: Sample, 1	Abundance: F7: Sample, 2	Abundance: F8: Sample, 2	Abundance: F9: Sample, 3	Abundance: F10: Sample, 3	Abundance: F11: Sample, 4	Abundance: F12: Sample, 4
	P42641 [120-129]	GGWHGLGNTR		0	3	352.177	31.9116	8		219.4	1.3	79.3			1.75482e+06	1.3085e+06	7144.58	11555.8	504379	595467
	P42641 [186-202]	VADYPFTTLVPSLGVVR		0	2	917.51	66.0392	7		217.4	2.3	80.3			2.53945e+06	2.13282e+06	39332.9	14886.7	837850	881386
	P42641 [208-230]	SFVVADIPGLIEGAAEGAGLGIR		0	3	738.071	79.5844	10		211.7	5.6	82.6			1.85364e+06	1.38413e+06	57970.4	31382.8	643847	606767
	P42641 [240-260]	VLLHLIDIDPIDGTDPVENAR		0	3	772.413	60.5936	7		229.7	2.4	67.9			1.08204e+07	9.04843e+06	159698	67748.9	2.83362e+06	3.01849e+06
	P42641 [261-268]	IIISELEK		0	2	472.787	43.3666	2		234.9	1.5	63.5			11856801	9466010	89971.5	53208.5	2.75756e+06	2.97537e+06
	P42641 [269-278]	YSQDLATKPR		0	2	589.811	25.0816	6		238.1	0.8	61			9077121	6.71314e+06	32692.7	22767.1	1.8712e+06	2.13809e+06
	P42641 [285-290]	IDLLDK		0	2	358.713	39.0679	2		185.7		14.3			4562904	3.71874e+06			294469	339425
	P42641 [285-296]	IDLLDKVEAEEK		1	2	701.377	48.0725	2				100							931493	746795
	P42641 [299-309]	AIAEALGWEDK		0	2	601.807	46.835	1		278.9	0.9	20.2			4799282	3.97269e+06	13595.3	14022.8	307127	326569
	P42641 [299-322]	AIAEALGWEDKYYLISAASGLGVK		1	3	842.449	64.9045	2		8.7		191.3			11211.5				238388	256723
	P42641 [3-24]	FVDEASILVVAGDGGNGCVSFR	1xCarbamidomethyl [C18]	0	2	1135.05	60.27	2		160.3	54.4	85.3			236390	247162	91344.3	73548.3	121622	136014
	P42641 [310-322]	YYLISAASGLGVK		0	2	671.374	53.7484	5		269.6	2.1	28.3			7562943	6568727	90255.5	33269.5	713376	766233
	P42641 [32-60]	GGPDGGDGGDGGDVWMEADENLNTLIDYR		0	3	999.092	70.401	2		209.7	14.7	75.6			267524	276859	19047		93748.5	102558
	P42641 [32-60]	GGPDGGDGGDGGDVWMEADENLNTLIDYR	1xOxidation [M16]	0	3	1004.43	68.2537	2		144.6		55.4			239778	201679			73885.7	95980
	P42641 [349-358]	VEFMWDDYHR		0	3	466.537	49.5785	2		145.2		54.8			203963	151789			67894.7	64981.5
	P42641 [349-358]	VEFMWDDYHR	1xOxidation [M4]	0	2	707.299	45.4966	5		245.2	1.9	52.9			2.31842e+06	1.80169e+06	40890.7	6370.43	423884	458388
	P42641 [90-95]	VPVGTR		0	2	314.692	20.1973	4		162.5		37.5			879180	727540			162956	208442
	P42641 [96-110]	VIDQGTGETMGDMTK		0	2	791.858	36.0814	3		134.8		65.2			1577785	1.30868e+06			597380	807374
	P42641 [96-110]	VIDQGTGETMGDMTK	1xOxidation [M]	0	2	799.856	28.6721	2		157.3		42.7			1.99169e+06	1.60508e+06			440057	533917
	P42641 [96-110]	VIDQGTGETMGDMTK	2xOxidation [M10; M13]	0	2	807.853	24.3764	1		148.3		51.7			1.78572e+06	1338645			494909	586165
FALSE	P07118	Valine--tRNA ligase [OS=Escherichia coli K-12]	37	25	25	108.1	5.34	74	213.1	137	37.9	11.9	1.3048e+07	1.5126e+07	9.82646e+06	8.29859e+06	2.40037e+06	2.60273e+06	786775	788578
	Positions in Master Proteins	Sequence	Modifications	# Missed Cleavages	PSM Charge (by Search Engine): Sequest HT	PSM m/z [Da] (by Search Engine): Sequest HT	PSM RT [min] (by Search Engine): Sequest HT	# PSMs	Abundances (Grouped): 1	Abundances (Grouped): 2	Abundances (Grouped): 3	Abundances (Grouped): 4	Abundance: F5: Sample, 1	Abundance: F6: Sample, 1	Abundance: F7: Sample, 2	Abundance: F8: Sample, 2	Abundance: F9: Sample, 3	Abundance: F10: Sample, 3	Abundance: F11: Sample, 4	Abundance: F12: Sample, 4
	P07118 [143-154]	FTMDEGLSNAVK	1xOxidation [M3]	0	2	664.315	36.7097	3	207.8	148.1	35.1	9.1	449539	601935	437390	314190	87275.2	88309.8	31413	16378.2
	P07118 [181-191]	TAISDLEVENR		0	2	623.818	40.6645	5	195.3	149.4	44.2	11.1	1.36255e+06	1.6368e+06	1.19421e+06	1.09259e+06	305236	373290	96755.9	74542.4
	P07118 [202-209]	YPLADGAK		0	2	417.722	28.9458	4	180.6	172	36	11.4	346843	491223	437290	353572	85819.4	78735.7	26608.7	25712.8
	P07118 [215-241]	DYLVVATTRPETLLGDTGVAVNPEDPR		0	3	966.833	58.3304	2	171.5	105.8	22.7		750403	803192	535043	429102	89231.9	118740
	P07118 [242-248]	YKDLIGK		1	2	418.748	28.9464	1	244.5	98.2	44.3	13	320299	349685	157347	114828	60402	60969.2	15770.9	19968.4
	P07118 [249-257]	YVILPLVNR		0	2	543.837	53.911	4	191.1	161.3	34.3	13.3	633914	631615	543506	524808	105317	122691	47309.2	40801
	P07118 [278-292]	ITPAHDFNDYEVGKR		1	3	587.955	35.569	1	225.2	137	28.1	9.7	254111	302567	194504	146214	37401.3	32047.7	11985.5
	P07118 [293-308]	HALPMINILTFDGDIR	1xOxidation [M5]	0	3	614.658	59.4318	3	211.5	134.8	38.1	15.6	234534	254156	171241	141350	45235.7	42785.6	18020.8
	P07118 [309-317]	ESAQVFDTK		0	2	512.752	30.9661	4	195.5	149.4	41	14.1	911709	1.1321e+06	822315	732951	207539	218340	61039.9	87312.4
	P07118 [318-334]	GNESDVYSSEIPAEFQK		0	2	950.436	48.3566	3	196.4	151.8	38.3	13.5	406176	469460	341154	334140	82843	87523	33188.9	27245.2
	P07118 [342-369]	KAVVAAVDALGLLEEIKPHDLTVPYGDR		1	4	748.163	65.2589	1	113.9	163		23	97274.1	84727	176039	95843.4			19744.9	17023.7
	P07118 [343-369]	AVVAAVDALGLLEEIKPHDLTVPYGDR		0	4	716.141	69.286	1	181.5	96.9	21.6		151199	267106	124625	92367.2	25907.1	22154.1
	P07118 [370-385]	GGVVIEPMLTDQWYVR	1xOxidation [M8]	0	2	939.975	58.047	2	191.8	85.2	23		158924	156404	73815.7	66390.2	14869.6	24035.7
	P07118 [386-407]	ADVLAKPAVEAVENGDIQFVPK		0	3	770.75	54.4066	3	222	132	29.7	16.3	431036	537996	309679	264508	64049.9	64709.9	37656.9	33232.9
	P07118 [4-20]	TYNPQDIEQPLYEHWEK		0	3	730.676	51.3004	2	228.6	114.4	42.5	14.5	545654	677326	343465	269730	101834	125461	33965.2	43665.6
	P07118 [419-427]	DIQDWCISR	1xCarbamidomethyl [C6]	0	2	596.776	46.7059	3	184.8	89.3	25.9		296418	361318	183561	136197	45967.3	45805.6
	P07118 [457-467]	ENNLGADVVLR		0	2	600.322	42.9442	1	161.3	195.9	32.5	10.4	168884	171879	241463	177366	38359.7	30648.1	10956
	P07118 [616-626]	FTLAALASTGR		0	2	554.312	51.7179	6	213.4	131.9	39.8	14.9	958341	1.06952e+06	657611	595412	170312	209512	63830.2	77928
	P07118 [72-92]	NTLWQVGTDHAGIATQMVVER		0	3	776.06	53.9991	3	173.7	90.8	35.5		424564	502992	268989	216775	79326.3	112216
	P07118 [802-808]	QAIVAVR		0	2	378.739	29.9043	3	214.3	130.6	40	15.1	263680	315123	197322	156447	56685.9	51153.4	17669.9	23421.2
	P07118 [812-827]	AEMNIAPGKPLELLLR	1xOxidation [M3]	0	3	594.339	55.3786	2	200.6	134.6	46.8	18	480677	544751	355830	331549	120096	118503	44767.7	46987.9
	P07118 [850-868]	LESITVLPADDKGPVSVTK		1	3	657.032	45.8506	6	228.3	121.8	35.5	14.4	1.46506e+06	1601900	900113	741508	237521	238625	88657.2	106032
	P07118 [869-891]	IIDGAELLIPMAGLINKEDELAR		1	3	832.124	70.9154	1	298.1	62.8	26.1	13	262074	294309	66792	51263.7	21525.9	27382.4	14163.8	10337.1
	P07118 [910-918]	LANEGFVAR		0	2	488.765	33.7744	6	211.6	133.4	40.3	14.7	912440	1.02821e+06	665470	560582	186116	182838	63702.4	70772.4
	P07118 [941-951]	LIEQQAVIAAL		0	2	584.85	59.0246	4	232.1	113.7	37.4	16.8	761668	839751	427685	358903	131498	126256	49567.7	67216.7
FALSE	B1XG23	Large ribosomal subunit protein bL20 [OS=Escherichia coli str. K-12 substr. DH10B]	58	12	12	13.5	11.47	71	26.8	225.8	91.6	55.8	1.99101e+07	2.24322e+07	1.98237e+08	159927006	7.04798e+07	7.40867e+07	4.28418e+07	4.52438e+07
	Positions in Master Proteins	Sequence	Modifications	# Missed Cleavages	PSM Charge (by Search Engine): Sequest HT	PSM m/z [Da] (by Search Engine): Sequest HT	PSM RT [min] (by Search Engine): Sequest HT	# PSMs	Abundances (Grouped): 1	Abundances (Grouped): 2	Abundances (Grouped): 3	Abundances (Grouped): 4	Abundance: F5: Sample, 1	Abundance: F6: Sample, 1	Abundance: F7: Sample, 2	Abundance: F8: Sample, 2	Abundance: F9: Sample, 3	Abundance: F10: Sample, 3	Abundance: F11: Sample, 4	Abundance: F12: Sample, 4
	B1XG23 [104-112]	VAFTALVEK		0	2	489.287	46.3043	11	30.5	223.3	91.1	55	5.72342e+06	5925154	47433768	38358152	17500764	17305622	10586550	10435295
	B1XG23 [34-41]	VAFQAVIK		0	2	438.271	41.9268	6	31.6	242	82.5	43.9	5.03335e+06	5.58368e+06	46554652	35329920	13534147	14119588	7.17139e+06	7556869
	B1XG23 [42-48]	AGQYAYR		0	2	414.704	25.247	8	17.8	236.7	95.6	50	577186	896227	12056341	7.62676e+06	3.97514e+06	3.77137e+06	1.84771e+06	2.21877e+06
	B1XG23 [59-64]	QLWIAR		0	2	393.735	41.9674	4	38.1	214.8	87.3	59.8	695365	835577	4813151	3.83825e+06	1.75532e+06	1.73635e+06	1.18929e+06	1.20494e+06
	B1XG23 [6-11]	RGVIAR		1	2	336.218	19.7692	1	15.7	228	107.8	48.5	673355	973589	12532524	11085675	5613494	5537713	2198412	2860184
	B1XG23 [71-78]	QNGISYSK		0	2	448.727	24.9164	4	13.1	187.6	119	80.2	213435	330661	4695348	3.06024e+06	2.48952e+06	2.32484e+06	1.47759e+06	1.77979e+06
	B1XG23 [79-85]	FINGLKK		1	2	410.258	27.2048	2	32.5	209.9	92	65.6	813150	879036	5.7144e+06	5232081	2365019	2.42763e+06	1.68517e+06	1.73371e+06
	B1XG23 [85-93]	KASVEIDRK		2	3	349.205	20.0006	5	32.6	129.5	131.8	106.1	97731.9	168005	553775	468230	498589	538909	358347	486308
	B1XG23 [86-92]	ASVEIDR		0	2	395.209	26.8686	4	12.6	261.7	79.8	45.9	183823	279780	4919243	4509791	1.43343e+06	1.44044e+06	750265	908545
	B1XG23 [86-93]	ASVEIDRK		1	2	459.256	22.5075	7	16.3	232.4	91.7	59.6	801851	1.22697e+06	15148974	13248978	5.49976e+06	5688234	3432412	3.85181e+06
	B1XG23 [93-103]	KILADIAVFDK		1	2	616.867	49.6879	7	31.5	153.6	130.7	84.3	230668	234921	1.21168e+06	1.0658e+06	948793	985335	620913	625832
	B1XG23 [94-103]	ILADIAVFDK		0	2	552.82	54.4195	12	27.6	217.3	91.1	64	4866795	5.09865e+06	42603296	36103132	14865840	18210632	11523724	11581741
FALSE	C4ZUG5	Large ribosomal subunit protein uL14 [OS=Escherichia coli BW2952]	56	7	7	13.5	10.42	68	2.8	261.8	116.2	19.1	421223	668373	5.52883e+07	4.30097e+07	2.15019e+07	2.17925e+07	3.46138e+06	3.67281e+06
	Positions in Master Proteins	Sequence	Modifications	# Missed Cleavages	PSM Charge (by Search Engine): Sequest HT	PSM m/z [Da] (by Search Engine): Sequest HT	PSM RT [min] (by Search Engine): Sequest HT	# PSMs	Abundances (Grouped): 1	Abundances (Grouped): 2	Abundances (Grouped): 3	Abundances (Grouped): 4	Abundance: F5: Sample, 1	Abundance: F6: Sample, 1	Abundance: F7: Sample, 2	Abundance: F8: Sample, 2	Abundance: F9: Sample, 3	Abundance: F10: Sample, 3	Abundance: F11: Sample, 4	Abundance: F12: Sample, 4
	C4ZUG5 [1-17]	MIQEQTMLNVADNSGAR		0	2	939.447	46.358	8	1.6	228.5	143.6	26.2		12820	2.12536e+06	1.48406e+06	1.07356e+06	1.15975e+06	204884	202899
	C4ZUG5 [1-17]	MIQEQTMLNVADNSGAR	1xOxidation [M]	0	2	947.444	44.0121	17		192	94.3	13.7			3.05711e+06	2.31845e+06	1.23134e+06	1.38772e+06	190070	190429
	C4ZUG5 [1-17]	MIQEQTMLNVADNSGAR	2xOxidation [M1; M7]	0	2	955.439	35.5641	10	8.7	252.5	113.6	25.2	79660.6	82034.9	2.59342e+06	2.11938e+06	1.04698e+06	1.06237e+06	216715	251562
	C4ZUG5 [24-30]	VLGGSHR		0	2	363.206	18.2927	6	0.7	270.8	111.8	16.7	5818.41	17294.8	4.10251e+06	3.71709e+06	1.75499e+06	1481625	235427	245133
	C4ZUG5 [31-40]	RYAGVGDIIK		1	2	546.314	37.8984	7	1.8	240.5	135.5	22.1	17111.9	21719.7	2.93323e+06	2.22116e+06	1.34755e+06	1.5347e+06	232103	237748
	C4ZUG5 [32-40]	YAGVGDIIK		0	2	468.263	42.8595	5	2.9	265.7	113.5	17.9	116981	142211	13445326	10369927	4976223	5109662	763626	825207
	C4ZUG5 [71-78]	RPDGSVIR		0	2	450.256	22.5228	2	2.7	275	105.9	16.4	49417	204406	11191876	9668997	4.14403e+06	3871710	571218	673487
	C4ZUG5 [79-98]	FDGNACVLLNNNSEQPIGTR	1xCarbamidomethyl [C6]	0	2	1110.03	47.4437	9		176.8	106.8	16.3			5.67589e+06	3.10106e+06	2.49219e+06	2.57826e+06	394051	380421
	C4ZUG5 [99-105]	IFGPVTR		0	2	395.234	35.375	4	5.1	269.9	105.3	19.7	152234	187887	10163525	8009622	3.43501e+06	3.60666e+06	653288	665930
FALSE	C4ZU30	Large ribosomal subunit protein bL25 [OS=Escherichia coli BW2952]	69	7	7	10.7	9.6	63	12.1	237.3	120.1	30.6	1.12661e+06	1.30598e+06	2.65291e+07	2.14069e+07	1.17335e+07	1.23922e+07	3.1477e+06	3.00454e+06
	Positions in Master Proteins	Sequence	Modifications	# Missed Cleavages	PSM Charge (by Search Engine): Sequest HT	PSM m/z [Da] (by Search Engine): Sequest HT	PSM RT [min] (by Search Engine): Sequest HT	# PSMs	Abundances (Grouped): 1	Abundances (Grouped): 2	Abundances (Grouped): 3	Abundances (Grouped): 4	Abundance: F5: Sample, 1	Abundance: F6: Sample, 1	Abundance: F7: Sample, 2	Abundance: F8: Sample, 2	Abundance: F9: Sample, 3	Abundance: F10: Sample, 3	Abundance: F11: Sample, 4	Abundance: F12: Sample, 4
	C4ZU30 [1-9]	MFTINAEVR		0	2	540.779	45.6524	6	14.9	192.8	154.8	37.6	106871	124354	1.79071e+06	1245477	1.19584e+06	1.20211e+06	288356	293443
	C4ZU30 [1-9]	MFTINAEVR	1xOxidation [M1]	0	2	548.777	41.6492	17	13.5	245.7	113.8	27	227715	322683	5392628	4509758	2171004	2402456	533974	550698
	C4ZU30 [22-34]	AANKFPAIIYGGK		1	3	450.59	44.4162	8	14.1	208.9	145.2	31.8	81840.1	89547.8	1.42639e+06	1.1283e+06	897259	866496	172643	215729
	C4ZU30 [35-46]	EAPLAIELDHDK		0	2	675.85	41.6486	5		200.8	84.9	14.3			8.4369e+06	6642173	3.12843e+06	3.19831e+06	497802	574129
	C4ZU30 [47-53]	VMNMQAK		0	2	411.204	24.5683	1	4.8	246.1	126	23.1	10149.3	18049.9	832801	566760	338498	365297	61118.1	68202.7
	C4ZU30 [54-68]	AEFYSEVLTIVVDGK		0	2	835.434	69.9448	12	24.9	211.6	116	47.5	523576	532766	4.85104e+06	4.14893e+06	2.31952e+06	2.60761e+06	1.18079e+06	858524
	C4ZU30 [86-93]	LQHIDFVR		0	2	514.288	38.0828	9	11.4	232.7	132.6	23.3	62704.7	82865.4	1.62326e+06	1.34538e+06	811417	874219	148906	146583
	C4ZU30 [86-94]	LQHIDFVRA		1	2	549.807	39.8903	5	15.2	243.6	106.9	34.3	113754	135715	2.17534e+06	1.82017e+06	871553	875736	264108	297230
FALSE	B1X833	Serine--tRNA ligase [OS=Escherichia coli str. K-12 substr. DH10B]	57	18	18	48.4	5.5	61	188.6	144.1	53.5	13.8	8.70375e+06	9.8271e+06	7.81517e+06	6.38829e+06	2.65062e+06	2.59796e+06	666647	686664
	Positions in Master Proteins	Sequence	Modifications	# Missed Cleavages	PSM Charge (by Search Engine): Sequest HT	PSM m/z [Da] (by Search Engine): Sequest HT	PSM RT [min] (by Search Engine): Sequest HT	# PSMs	Abundances (Grouped): 1	Abundances (Grouped): 2	Abundances (Grouped): 3	Abundances (Grouped): 4	Abundance: F5: Sample, 1	Abundance: F6: Sample, 1	Abundance: F7: Sample, 2	Abundance: F8: Sample, 2	Abundance: F9: Sample, 3	Abundance: F10: Sample, 3	Abundance: F11: Sample, 4	Abundance: F12: Sample, 4
	B1X833 [131-137]	EFDFEVR		0	2	471.222	47.2635	5	209.3	134.5	40.9	15.3	782019	843978	601588	452934	137360	183648	54461.2	64610.2
	B1X833 [138-156]	DHVTLGEMHSGLDFAAAVK	1xOxidation [M8]	0	3	671.994	44.9894	4	151.1	176.6	54.4	17.9	346287	354433	439695	381361	143243	111284	39839.7	43470.3
	B1X833 [213-247]	FAGDLFHTRPLEEEADTSNYALIPTAEVPLTNLVR		0	4	975.751	65.3789	1	191.7	89.3	19		429442	593419	275078	201210	103927	24158.5
	B1X833 [248-259]	GEIIDEDDLPIK		0	2	678.847	50.3272	6	184.8	138.1	56.1	21	613983	689165	546671	431836	191671	203105	75599.6	72365.9
	B1X833 [30-36]	LGALEER		0	2	394.219	29.2913	6	185.2	146.6	53.5	14.6	545460	612565	479505	436680	168696	165301	41805.6	49893.9
	B1X833 [315-324]	VLQLLGLPYR		0	2	586.364	58.7491	3	155.1	105.9	39		215807	242144	170174	142998	50297.5	65701.9
	B1X833 [315-325]	VLQLLGLPYRK		1	2	650.412	51.0488	1	169.6	94.3	36.1		177372	228789	116185	108101	36179	50839.9
	B1X833 [326-339]	IILCTGDMGFGACK	2xCarbamidomethyl [C4; C13]; 1xOxidation [M8]	0	2	779.855	44.7441	2	176.1	78.9	45		454288	502296	228144	200926	131082	113922
	B1X833 [340-354]	TYDLEVWIPAQNTYR		0	2	934.963	60.0745	2	225	113.8	43.6	17.7	169045	185104	103632	77245.9	32700.3	35876.5	13912.1
	B1X833 [355-368]	EISSCSNVWDFQAR	1xCarbamidomethyl [C5]	0	2	849.882	50.5055	2	168.2	90.7	41.1		264271	293272	162912	138216	65491.5	70605.2
	B1X833 [384-397]	LVHTLNGSGLAVGR		0	3	465.269	37.1133	1	160.4	97.5	42.1		538614	680254	462916	292207	178141	141359
	B1X833 [398-412]	TLVAVMENYQQADGR		0	2	847.911	50.5933	5	197.2	131	54.8	17	552211	652918	463631	343344	163771	170124	54295.2	49509.2
	B1X833 [44-51]	TENLQAER		0	2	480.74	23.6342	5	98.1	208.4	70.8	22.7	278423	416361	790318	662676	247737	243746	70164.6	88574.3
	B1X833 [63-77]	ARGEDIEPLRLEVNK		2	3	580.32	40.1272	1	220.8	115.2	46.1	18	405203	426890	251612	187180	87325.5	86280.6	33200.3	34590.6
	B1X833 [78-86]	LGEELDAAK		0	2	473.249	32.0789	5	191	141.2	52.3	15.5	1.00731e+06	1.20832e+06	890931	746505	306071	298347	75367	106992
	B1X833 [87-97]	AELDALQAEIR		0	2	614.829	48.1629	8	174.5	153.3	55.1	17.1	1.34994e+06	1.20882e+06	1.1947e+06	1.05383e+06	400939	405887	124429	125295
	B1X833 [9-17]	NEPDAVAEK		0	2	486.735	22.5243	1	75.1	227	76.4	21.5	68238.4	99138.6	273107	226031	87863.5	79569	21564.4	25780.5
	B1X833 [98-125]	DIALTIPNLPADEVPVGKDENDNVEVSR		1	3	1007.18	57.2022	3	207.7	126.8	50.3	15.2	505830	589232	364372	305013	118130	148201	62009	25581.8
FALSE	B1X6F8	Small ribosomal subunit protein uS8 [OS=Escherichia coli str. K-12 substr. DH10B]	60	8	8	14.1	9.42	60	9.2	283.1	68.3	39.4	1.20276e+06	1.37959e+06	4.33853e+07	3.64897e+07	9.56693e+06	9.64022e+06	5.31948e+06	5.77302e+06
	Positions in Master Proteins	Sequence	Modifications	# Missed Cleavages	PSM Charge (by Search Engine): Sequest HT	PSM m/z [Da] (by Search Engine): Sequest HT	PSM RT [min] (by Search Engine): Sequest HT	# PSMs	Abundances (Grouped): 1	Abundances (Grouped): 2	Abundances (Grouped): 3	Abundances (Grouped): 4	Abundance: F5: Sample, 1	Abundance: F6: Sample, 1	Abundance: F7: Sample, 2	Abundance: F8: Sample, 2	Abundance: F9: Sample, 3	Abundance: F10: Sample, 3	Abundance: F11: Sample, 4	Abundance: F12: Sample, 4
	B1X6F8 [118-130]	QAGLGGEIICYVA	1xCarbamidomethyl [C10]	0	2	675.839	60.1375	3	7.8	261.8	87.9	42.5	82701.2	83267.2	3.07156e+06	2.51625e+06	861955	1.01168e+06	425574	477906
	B1X6F8 [2-13]	SMQDPIADMLTR		0	2	689.326	56.7789	6	4.2	236.8	97	62	14610.7	11511.9	810554	659704	287645	312231	193218	189677
	B1X6F8 [2-13]	SMQDPIADMLTR	1xOxidation [M]	0	2	697.324	52.7693	10	6.5	253.6	84.7	55.1	31910.7	49292.9	1.67778e+06	1.42281e+06	487056	547376	328183	343914
	B1X6F8 [2-13]	SMQDPIADMLTR	2xOxidation [M2; M9]	0	2	705.324	40.1113	9	13.8	240.8	88.6	56.8	111241	118938	2.30885e+06	1742570	730262	745601	456460	490601
	B1X6F8 [34-41]	VAIANVLK		0	2	414.271	41.7694	4	9.4	304.6	55.8	30.2	79987.8	178424	4.40828e+06	3.43138e+06	699019	727289	365798	405675
	B1X6F8 [34-50]	VAIANVLKEEGFIEDFK		1	3	641.347	61.0294	6	5.4	328.7	45.4	20.5	76262.7	60876.2	4.635e+06	3.73302e+06	553109	597673	281948	237602
	B1X6F8 [42-50]	EEGFIEDFK		0	2	557.259	48.7093	3	16.1	327.9	31.1	24.9	104218	104315	2.16198e+06	2.09813e+06	194377	210316	157485	165997
	B1X6F8 [51-64]	VEGDTKPELELTLK		0	3	524.623	43.6437	4	3.4	352.7	31.1	12.8	57322.6	64000.4	6.81433e+06	5.77049e+06	552808	554770	231344	223797
	B1X6F8 [70-77]	AVVESIQR		0	2	451.259	28.8809	2	8.7	273.4	75.7	42.2	260671	341583	10350106	8574606	2609030	2.60773e+06	1.25228e+06	1.69149e+06
	B1X6F8 [95-108]	VMAGLGIAVVSTSK		0	2	666.882	48.9035	6	11.1	240.9	86.7	61.4	130088	112604	2.7198e+06	2.54626e+06	1.02719e+06	872856	733347	613626
	B1X6F8 [95-108]	VMAGLGIAVVSTSK	1xOxidation [M2]	0	2	674.879	44.2648	7	14.8	244.5	87.6	53.1	253745	254778	4.42705e+06	3.99444e+06	1.56447e+06	1.4527e+06	893848	932739
FALSE	P0AA10	Large ribosomal subunit protein uL13 [OS=Escherichia coli K-12]	74	12	12	16	9.91	59	9.7	237.6	132.5	20.2	1.8881e+06	2.41068e+06	5.72262e+07	4.7843e+07	2.86193e+07	2.97191e+07	4.40166e+06	4.50441e+06
	Positions in Master Proteins	Sequence	Modifications	# Missed Cleavages	PSM Charge (by Search Engine): Sequest HT	PSM m/z [Da] (by Search Engine): Sequest HT	PSM RT [min] (by Search Engine): Sequest HT	# PSMs	Abundances (Grouped): 1	Abundances (Grouped): 2	Abundances (Grouped): 3	Abundances (Grouped): 4	Abundance: F5: Sample, 1	Abundance: F6: Sample, 1	Abundance: F7: Sample, 2	Abundance: F8: Sample, 2	Abundance: F9: Sample, 3	Abundance: F10: Sample, 3	Abundance: F11: Sample, 4	Abundance: F12: Sample, 4
	P0AA10 [100-106]	VIEIAVK		0	2	386.252	37.2629	6	9.8	243.8	125.9	20.4	294254	311520	8320581	6756800	3812810	3.9293e+06	605443	652153
	P0AA10 [124-142]	VYAGNEHNHAAQQPQVLDI		0	3	702.011	42.0743	7	8.3	254.7	120.2	16.8	196831	221330	7163082	5.67322e+06	3.0112e+06	3.00454e+06	407415	436317
	P0AA10 [13-23]	RDWYVVDATGK		1	2	655.33	41.0795	7	4.9	243.8	134.7	16.7	26234.2	36795.9	1.75241e+06	1.3853e+06	860558	860693	102207	111051
	P0AA10 [14-23]	DWYVVDATGK		0	2	577.28	47.5831	2	7.4	235	135.9	21.7	46778.7	48755.1	1.65247e+06	1.38484e+06	824148	928651	132479	148022
	P0AA10 [28-34]	LATELAR		0	2	387.229	29.1396	2	10.1	243.6	128	18.4	216850	314370	6.49678e+06	6.15155e+06	3.40784e+06	3.23828e+06	452300	503336
	P0AA10 [3-12]	TFTAKPETVK		0	2	561.313	26.1547	7	23.3	239.6	114.8	22.3	541208	833489	7.68256e+06	6.20516e+06	3.38678e+06	3.22977e+06	587379	705287
	P0AA10 [3-13]	TFTAKPETVKR		1	3	426.578	23.9674	5	11.5	196.7	164.9	26.8	101663	114383	2.07442e+06	1.63776e+06	1534209	1.55695e+06	236373	267323
	P0AA10 [42-61]	AEYTPHVDTGDYIIVLNADK		0	3	745.375	53.3089	2	4.9	234.5	139.9	20.7	187121	176732	9786847	7619436	4586829	5780850	885638	654134
	P0AA10 [62-68]	VAVTGNK		0	2	344.703	19.2105	2	2.2	241.3	136.4	20.1	11327.3	26446.8	1956301	1.89222e+06	1.09873e+06	1.07697e+06	152250	168928
	P0AA10 [62-69]	VAVTGNKR		1	2	422.753	18.1969	4	2.9	210.1	164.6	22.4		8917.94	682348	629614	528893	498454	65124.3	74798.8
	P0AA10 [73-85]	VYYHHTGHIGGIK		0	3	494.594	25.689	3	12	247.8	117.3	22.9	59423.9	62692.1	1.39493e+06	1.1444e+06	664009	539271	105138	130160
	P0AA10 [86-95]	QATFEEMIAR		0	2	598.293	48.4502	6	5.3	233.4	143.2	18.2	68960.8	90013.5	3.48809e+06	3.46919e+06	2.09946e+06	2169530	275781	266242
	P0AA10 [86-95]	QATFEEMIAR	1xOxidation [M7]	0	2	606.29	38.8737	6	7.8	223.8	148.1	20.3	137448	165233	4775418	3893517	2.80383e+06	2.90582e+06	394131	386657
FALSE	C4ZUH6	Small ribosomal subunit protein uS10 [OS=Escherichia coli BW2952]	51	8	8	11.7	9.69	57	14.6	241.3	104.6	39.6	2.16424e+06	2.41877e+06	4.15527e+07	3.42526e+07	1.63763e+07	1.63218e+07	6.05343e+06	6.31859e+06
	Positions in Master Proteins	Sequence	Modifications	# Missed Cleavages	PSM Charge (by Search Engine): Sequest HT	PSM m/z [Da] (by Search Engine): Sequest HT	PSM RT [min] (by Search Engine): Sequest HT	# PSMs	Abundances (Grouped): 1	Abundances (Grouped): 2	Abundances (Grouped): 3	Abundances (Grouped): 4	Abundance: F5: Sample, 1	Abundance: F6: Sample, 1	Abundance: F7: Sample, 2	Abundance: F8: Sample, 2	Abundance: F9: Sample, 3	Abundance: F10: Sample, 3	Abundance: F11: Sample, 4	Abundance: F12: Sample, 4
	C4ZUH6 [17-30]	LIDQATAEIVETAK		0	2	751.411	47.447	11	14.7	251.5	98.1	35.7	763974	799541	1.46121e+07	1.22112e+07	5.20437e+06	5.21703e+06	1.87219e+06	1.91777e+06
	C4ZUH6 [17-31]	LIDQATAEIVETAKR		1	3	553.31	45.4395	6	23.7	177.9	126.8	71.6	162109	200697	1.56544e+06	1.16713e+06	962885	964581	547597	540763
	C4ZUH6 [32-37]	TGAQVR		0	2	316.18	17.9072	1		179	109.9	11.1			67543.2	198717	89557.2	56424.5	12440.2	4143.77
	C4ZUH6 [38-45]	GPIPLPTR		0	2	425.761	39.7106	16	12.8	249.4	100	37.9	147252	156990	3149590	2.78863e+06	1.18348e+06	1.19208e+06	432271	468486
	C4ZUH6 [38-46]	GPIPLPTRK		1	2	489.809	33.2121	3	16	219.4	121.3	43.2	58906.9	63347.1	914944	767636	449889	477072	151273	180310
	C4ZUH6 [47-59]	ERFTVLISPHVNK		1	3	513.958	40.7971	2		167.3	90	42.7			603413	481849	249997	336855	141911	133386
	C4ZUH6 [49-59]	FTVLISPHVNK		0	3	418.912	42.5704	8	13.6	243.4	104.5	38.5	381327	423563	7.94196e+06	6.46652e+06	3.01124e+06	3.14519e+06	1.12009e+06	1.1447e+06
	C4ZUH6 [73-82]	LVDIVEPTEK		0	2	571.819	39.7949	10	14.9	239.2	106.9	39	650675	774631	12697693	10170886	5.22488e+06	4932615	1.77566e+06	1.92903e+06
FALSE	C4ZUG0	Large ribosomal subunit protein uL6 [OS=Escherichia coli BW2952]	75	10	10	18.9	9.7	54	15	256.7	86.9	41.3	1.01176e+06	1.60751e+06	2.43659e+07	1.95819e+07	7.18179e+06	7.62017e+06	3.36798e+06	3.67051e+06
	Positions in Master Proteins	Sequence	Modifications	# Missed Cleavages	PSM Charge (by Search Engine): Sequest HT	PSM m/z [Da] (by Search Engine): Sequest HT	PSM RT [min] (by Search Engine): Sequest HT	# PSMs	Abundances (Grouped): 1	Abundances (Grouped): 2	Abundances (Grouped): 3	Abundances (Grouped): 4	Abundance: F5: Sample, 1	Abundance: F6: Sample, 1	Abundance: F7: Sample, 2	Abundance: F8: Sample, 2	Abundance: F9: Sample, 3	Abundance: F10: Sample, 3	Abundance: F11: Sample, 4	Abundance: F12: Sample, 4
	C4ZUG0 [100-134]	GNVINLSLGFSHPVDHQLPAGITAECPTQTEIVLK	1xCarbamidomethyl [C26]	0	4	939.741	58.3468	4		93.2	59.4	147.4			217406	145584	47025.4	273058	323620	244607
	C4ZUG0 [139-149]	QVIGQVAADLR		0	2	585.335	44.1145	10	7.4	270.1	88.9	33.5	91615.7	116644	3.95203e+06	3.62009e+06	1245177	1.2455e+06	417408	528072
	C4ZUG0 [164-170]	YADEVVR		0	2	426.215	27.9208	6	22.5	233.6	96.1	47.7		170515	2.02789e+06	1.54185e+06	698174	757953	339305	384345
	C4ZUG0 [19-27]	INGQVITIK		0	2	493.306	37.6468	1	28.4	212.9	103.8	54.9	160389	213277	1.5696e+06	1.22657e+06	647016	708103	357497	358177
	C4ZUG0 [36-44]	TLNDAVEVK		0	2	494.768	31.8655	5	20.1	248.2	88.6	43.1	197024	297374	3.219e+06	2.76463e+06	1.04618e+06	1.08289e+06	468570	571687
	C4ZUG0 [45-55]	HADNTLTFGPR		0	3	410.207	35.2101	6	17.6	258.2	84.4	39.8	103200	132049	2.04977e+06	1.43406e+06	555080	566368	256278	272886
	C4ZUG0 [56-69]	DGYADGWAQAGTAR		0	2	719.82	41.3867	3		198.1	77.9	24.1			854484	660148	274599	317646	85966.5	96791
	C4ZUG0 [7-18]	APVVVPAGVDVK		0	2	575.846	41.0243	8	23	254.1	85.2	37.7	323115	534616	5379457	3920883	1.48711e+06	1.59461e+06	653233	712349
	C4ZUG0 [70-85]	ALLNSMVIGVTEGFTK		0	2	840.456	66.5526	6	3.6	262.7	89.8	43.9		14395.5	1.11565e+06	962354	347740	360800	175452	170622
	C4ZUG0 [70-85]	ALLNSMVIGVTEGFTK	1xOxidation [M6]	0	2	848.455	56.1684	2	10.8	343.4	36.2	9.7	39107.6	32925.6	1.29232e+06	1.01301e+06	178929	81244.9	30666	34015.3
	C4ZUG0 [87-95]	LQLVGVGYR		0	2	502.798	44.9763	3	11	283.7	73.5	31.8	97310.8	95711.9	2688322	2.29277e+06	654768	631998	259982	296962
FALSE	B1XBT0	Ribosome maturation factor RimM [OS=Escherichia coli str. K-12 substr. DH10B]	54	9	9	20.6	4.81	53	2.2	199.1	136.4	62.3	134284	143919	1.39376e+07	1.17012e+07	8.38681e+06	9.12973e+06	3.98007e+06	4.00567e+06
	Positions in Master Proteins	Sequence	Modifications	# Missed Cleavages	PSM Charge (by Search Engine): Sequest HT	PSM m/z [Da] (by Search Engine): Sequest HT	PSM RT [min] (by Search Engine): Sequest HT	# PSMs	Abundances (Grouped): 1	Abundances (Grouped): 2	Abundances (Grouped): 3	Abundances (Grouped): 4	Abundance: F5: Sample, 1	Abundance: F6: Sample, 1	Abundance: F7: Sample, 2	Abundance: F8: Sample, 2	Abundance: F9: Sample, 3	Abundance: F10: Sample, 3	Abundance: F11: Sample, 4	Abundance: F12: Sample, 4
	B1XBT0 [110-126]	DLMGCQVVTTEGYDLGK	1xCarbamidomethyl [C5]	0	2	943.437	51.4411	3		143.7	111.5	44.7			418762	339112	256172	333833	104455	131770
	B1XBT0 [110-126]	DLMGCQVVTTEGYDLGK	1xOxidation [M3]; 1xCarbamidomethyl [C5]	0	2	951.433	46.3858	5		175.9	92.8	31.3			1.25234e+06	1.03349e+06	575775	625554	205239	199358
	B1XBT0 [127-142]	VVDMMETGSNDVLVIK		0	2	875.442	53.6583	3		115	123.9	61.1			285568	239928	250821	316931	149772	129307
	B1XBT0 [127-142]	VVDMMETGSNDVLVIK	1xOxidation [M]	0	2	883.437	48.1536	10		163.1	92.2	44.6			878259	794754	446624	499626	252732	206552
	B1XBT0 [127-142]	VVDMMETGSNDVLVIK	2xOxidation [M4; M5]	0	2	891.436	43.0888	5	3	204.7	135.3	57	21282.9	17277.1	1426304	1.19418e+06	840680	885030	352300	374398
	B1XBT0 [155-165]	LVPFLDGQVIK		0	2	614.87	57.1224	4	3.4	210.5	126.9	59.3	57369.9	62307.9	3.96448e+06	3.46837e+06	2146908	2.32789e+06	1.09007e+06	1.00069e+06
	B1XBT0 [155-166]	LVPFLDGQVIKK		1	3	452.947	49.6882	7		125.4	110.6	64			593137	511141	484913	486061	296980	265914
	B1XBT0 [166-172]	KVDLTTR		1	2	416.748	24.0906	6	3.3	174	155.2	67.5	11275	16337.8	779924	643779	628485	635157	262029	288031
	B1XBT0 [173-182]	SIEVDWDPGF		0	2	582.765	63.5235	2		128.9	113.1	58			268747	285079	219707	268574	127383	121813
	B1XBT0 [4-18]	QLTAQAPVDPIVLGK		0	2	775.452	49.2714	2	3	197.5	138.6	60.9	40483.5	40720.5	2.96588e+06	2.38274e+06	1.83356e+06	1.89993e+06	772920	868878
	B1XBT0 [52-64]	AGQWQQVQLESWK		0	2	794.4	51.2293	4		118.2	120.8	61			605654	501603	493361	642632	277165	291802
	B1XBT0 [65-73]	HHNQDMIIK		0	3	379.194	23.8667	2	3	219.8	117.5	59.8	3872.79	7275.52	498587	306982	209799	208502	89026.9	127151
FALSE	P0ADZ0	Large ribosomal subunit protein uL23 [OS=Escherichia coli K-12]	48	6	6	11.2	9.94	52	38.6	228.5	104.8	28.1	2.84749e+06	2.81981e+06	1.8222e+07	1.54037e+07	7.63843e+06	7.72878e+06	2.07793e+06	2.04457e+06
	Positions in Master Proteins	Sequence	Modifications	# Missed Cleavages	PSM Charge (by Search Engine): Sequest HT	PSM m/z [Da] (by Search Engine): Sequest HT	PSM RT [min] (by Search Engine): Sequest HT	# PSMs	Abundances (Grouped): 1	Abundances (Grouped): 2	Abundances (Grouped): 3	Abundances (Grouped): 4	Abundance: F5: Sample, 1	Abundance: F6: Sample, 1	Abundance: F7: Sample, 2	Abundance: F8: Sample, 2	Abundance: F9: Sample, 3	Abundance: F10: Sample, 3	Abundance: F11: Sample, 4	Abundance: F12: Sample, 4
	P0ADZ0 [13-19]	APHVSEK		0	2	384.205	18.1875	4	1.6	276.4	107	15		27315.8	5.00696e+06	4260254	1.76795e+06	1.80835e+06	241808	259737
	P0ADZ0 [20-26]	ASTAMEK		0	2	369.178	18.6922	1		143.9	56.1				964088	1312348	459066	418636
	P0ADZ0 [50-64]	LFEVEVEVVNTLVVK		0	2	858.992	69.4366	30	167.4	98.8	64.2	69.6	2.55071e+06	2.26172e+06	1.49983e+06	1.33913e+06	973056	872051	1.0568e+06	942869
	P0ADZ0 [82-88]	KAYVTLK		1	2	411.757	27.2895	4	12.1	201.4	160.6	25.9		101042	1.9851e+06	1.42959e+06	1.36262e+06	1.32392e+06	211265	222633
	P0ADZ0 [83-88]	AYVTLK		0	2	347.711	32.4071	4	11.4	280.5	90.2	17.8	125492	213965	4.52557e+06	3.596e+06	1.25307e+06	1.34406e+06	238638	275241
	P0ADZ0 [89-100]	EGQNLDFVGGAE		0	2	618.28	47.4485	9	12.3	245.2	120.9	21.5	171291	215761	4.24046e+06	3.4664e+06	1.82267e+06	1.96176e+06	329420	344091
FALSE	P0A7M2	Large ribosomal subunit protein bL28 [OS=Escherichia coli K-12]	72	8	8	9	11.41	45	2.7	267.2	107.6	22.5	242384	344139	3.13577e+07	2.65213e+07	1.11295e+07	1.21221e+07	2.31266e+06	2.54545e+06
	Positions in Master Proteins	Sequence	Modifications	# Missed Cleavages	PSM Charge (by Search Engine): Sequest HT	PSM m/z [Da] (by Search Engine): Sequest HT	PSM RT [min] (by Search Engine): Sequest HT	# PSMs	Abundances (Grouped): 1	Abundances (Grouped): 2	Abundances (Grouped): 3	Abundances (Grouped): 4	Abundance: F5: Sample, 1	Abundance: F6: Sample, 1	Abundance: F7: Sample, 2	Abundance: F8: Sample, 2	Abundance: F9: Sample, 3	Abundance: F10: Sample, 3	Abundance: F11: Sample, 4	Abundance: F12: Sample, 4
	P0A7M2 [11-18]	RPVTGNNR		0	2	457.252	16.9711	3	0.8	257.6	112	29.5	6240.95	14385.3	3.39053e+06	2438481	1.20594e+06	1.29633e+06	317451	340748
	P0A7M2 [19-26]	SHALNATK		0	2	421.229	18.214	7	0.8	271.6	104	23.6	8430.02	26633.6	5.3737e+06	4.50254e+06	1.84363e+06	1.92538e+06	405420	450774
	P0A7M2 [29-37]	FLPNLHSHR		0	3	374.205	30.3451	9	5.9	286.5	90.7	16.9		76760	4.15116e+06	3.37018e+06	1.2221e+06	1147869	203288	239535
	P0A7M2 [38-45]	FWVESEKR		1	2	540.777	33.892	7	2.9	262.2	112.6	22.4	23739	14806.7	1.86007e+06	1.50287e+06	729389	706481	138444	146786
	P0A7M2 [4-10]	VCQVTGK	1xCarbamidomethyl [C2]	0	2	396.207	19.5086	6	1	263	115.2	20.8		10871.5	2.84431e+06	2.62193e+06	1.18714e+06	1.20457e+06	189238	246004
	P0A7M2 [45-50]	RFVTLR		1	2	396.248	30.6463	2	7.6	287.3	87.8	17.3	53914.5	62828.9	2.34342e+06	2.06544e+06	684431	661218	124026	140877
	P0A7M2 [62-72]	KGIDTVLAELR		1	2	607.859	52.4134	7		197.4	85.5	17.1			1.83952e+06	1.46464e+06	619744	816279	129101	156263
	P0A7M2 [63-72]	GIDTVLAELR		0	2	543.812	57.7963	4	4.1	258.6	114	23.3	150060	137853	9554972	8555236	3.6371e+06	4363933	805694	824462
FALSE	C5A0S3	Large ribosomal subunit protein uL11 [OS=Escherichia coli BW2952]	38	5	5	14.9	9.63	44	23.1	260.2	87	29.6	2.45492e+06	2.99075e+06	3.39953e+07	2.73213e+07	1.00988e+07	1.02871e+07	3.24219e+06	3.70294e+06
	Positions in Master Proteins	Sequence	Modifications	# Missed Cleavages	PSM Charge (by Search Engine): Sequest HT	PSM m/z [Da] (by Search Engine): Sequest HT	PSM RT [min] (by Search Engine): Sequest HT	# PSMs	Abundances (Grouped): 1	Abundances (Grouped): 2	Abundances (Grouped): 3	Abundances (Grouped): 4	Abundance: F5: Sample, 1	Abundance: F6: Sample, 1	Abundance: F7: Sample, 2	Abundance: F8: Sample, 2	Abundance: F9: Sample, 3	Abundance: F10: Sample, 3	Abundance: F11: Sample, 4	Abundance: F12: Sample, 4
	C5A0S3 [104-113]	AQLQEIAQTK		0	2	565.315	32.9138	7	22.3	272.1	79.4	26.2	676157	771229	9668032	8.06321e+06	2533648	2622278	793784	907331
	C5A0S3 [114-127]	AADMTGADIEAMTR		0	2	726.825	45.3534	4	23.3	270	80.6	26.1	75309.5		915840	829910	265362	255118	85538.5	83168.3
	C5A0S3 [114-127]	AADMTGADIEAMTR	1xOxidation [M]	0	2	734.825	40.624	8	8	286.1	88.4	17.4	55277.4	64401.4	2.38e+06	1.8902e+06	632690	678925	125285	133218
	C5A0S3 [114-127]	AADMTGADIEAMTR	2xOxidation [M4; M12]	0	2	742.82	30.9793	6	37.3	224.1	94.4	44.1	290413	457089	2.47984e+06	1.92846e+06	921215	921904	379206	489152
	C5A0S3 [52-65]	GLPIPVVITVYADR		0	2	756.942	64.6578	12	24	261.5	85.3	29.1	279456	353011	3.84611e+06	3.03722e+06	1.04955e+06	1184651	397598	363537
	C5A0S3 [66-72]	SFTFVTK		0	2	415.226	41.1947	6		220.1	64.1	15.8			4.429e+06	3.6295e+06	1.18661e+06	1151200	283948	291824
	C5A0S3 [73-81]	TPPAAVLLK		0	2	455.292	40.8504	1	32.1	240.4	92.9	34.6	1.07831e+06	1.34502e+06	10276467	7.94283e+06	3.50972e+06	3.47298e+06	1.17683e+06	1.43471e+06
FALSE	B1XAQ2	Peptide chain release factor 1 [OS=Escherichia coli str. K-12 substr. DH10B]	54	14	14	40.5	5.26	43	244	82.7	61.8	11.5	6.57962e+06	8.23079e+06	2.83691e+06	2.19417e+06	1.80937e+06	1.91989e+06	372530	323437
	Positions in Master Proteins	Sequence	Modifications	# Missed Cleavages	PSM Charge (by Search Engine): Sequest HT	PSM m/z [Da] (by Search Engine): Sequest HT	PSM RT [min] (by Search Engine): Sequest HT	# PSMs	Abundances (Grouped): 1	Abundances (Grouped): 2	Abundances (Grouped): 3	Abundances (Grouped): 4	Abundance: F5: Sample, 1	Abundance: F6: Sample, 1	Abundance: F7: Sample, 2	Abundance: F8: Sample, 2	Abundance: F9: Sample, 3	Abundance: F10: Sample, 3	Abundance: F11: Sample, 4	Abundance: F12: Sample, 4
	B1XAQ2 [110-116]	NAFLEVR		0	2	424.734	40.9527	3	233.2	87.2	64	15.6	569618	602097	237450	201765	153279	168431	36330.5	42474
	B1XAQ2 [117-133]	AGTGGDEAALFAGDLFR		0	2	834.405	62.5906	2	246.5	72.7	62.3	18.4	691944	822811	256130	193352	178621	203865	58970.1	53940.7
	B1XAQ2 [16-34]	HEEVQALLGDAQTIADQER		0	3	708.35	55.2488	6	178.2	73.1	48.7		770168	900276	397170	293876	218960	236211
	B1XAQ2 [166-174]	ISGDGVYGR		0	2	462.233	28.3596	1	217.4		65.3	17.3	409661	697956			159297	162200	40304.1	44744.8
	B1XAQ2 [187-195]	VPATESQGR		0	2	472.743	19.4171	2	79.3	176.8	117.1	26.9	59375.7	95263.4	169902	165485	111255	110807	21277.9	30510.4
	B1XAQ2 [196-223]	IHTSACTVAVMPELPDAELPDINPADLR	1xCarbamidomethyl [C6]	0	3	1015.84	62.1378	2	234.4	27.7	37.9		209578	301797	32594.1	27123.7	41349	40024.9
	B1XAQ2 [196-223]	IHTSACTVAVMPELPDAELPDINPADLR	1xCarbamidomethyl [C6]; 1xOxidation [M11]	0	3	1021.17	58.2041	1	235.7	38.6	25.6		361218	394547	71980.9	53235.5	37939.2	44478.1
	B1XAQ2 [229-245]	SSGAGGQHVNTTDSAIR		0	3	553.268	24.9546	4	216.9	108.8	60.2	14	538429	943351	366543	348764	198648	196749	44088.3	48198.1
	B1XAQ2 [246-261]	ITHLPTGIVVECQDER	1xCarbamidomethyl [C12]	0	3	622.984	42.5635	6	259.1	77.2	51.2	12.5	825152	1.00274e+06	319555	229817	174675	184954	43310.9	44248.1
	B1XAQ2 [270-277]	ALSVLGAR		0	2	393.745	37.7212	4	241.4	91.4	55.1	12.1	542791	546396	231175	184140	115196	134070	22749.3	32740.7
	B1XAQ2 [309-316]	TYNFPQGR		0	2	491.741	34.2256	1	240.6	84.7	59.2	15.5	253216	269184	106342	79428.4	61125.7	67545.8	16939.7	16802.9
	B1XAQ2 [337-360]	LDMLIEPIIQEHQADQLAALSEQE		0	3	912.126	65.7878	2	204.4	51.6	44		150041	175677	52186.1	32125.8	31732.8	38504.5
	B1XAQ2 [41-50]	EYAQLSDVSR		0	2	584.285	35.8473	6	239.2	83.6	57.5	19.8	858880	1.00797e+06	430205	245620	226682	220420	77012.5
	B1XAQ2 [76-83]	EMAQDELR		0	2	496.23	29.6123	1	242.3	79.5	63	15.2	134281	213998	67247.5	46000	44609.7	43478.3	11547.1	9776.96
	B1XAQ2 [89-103]	SEQLEQQLQVLLLPK		0	2	883.506	65.2833	2	177.8	74.3	47.9		205270	256721	98428.4	93441.9	55997.6	68151
FALSE	B1X6E6	Large ribosomal subunit protein bL17 [OS=Escherichia coli str. K-12 substr. DH10B]	46	7	7	14.4	11.05	39	10.7	188.5	122.2	78.7	644939	672267	1.26297e+07	1.05891e+07	7.40186e+06	7.59043e+06	4.70518e+06	4.95074e+06
	Positions in Master Proteins	Sequence	Modifications	# Missed Cleavages	PSM Charge (by Search Engine): Sequest HT	PSM m/z [Da] (by Search Engine): Sequest HT	PSM RT [min] (by Search Engine): Sequest HT	# PSMs	Abundances (Grouped): 1	Abundances (Grouped): 2	Abundances (Grouped): 3	Abundances (Grouped): 4	Abundance: F5: Sample, 1	Abundance: F6: Sample, 1	Abundance: F7: Sample, 2	Abundance: F8: Sample, 2	Abundance: F9: Sample, 3	Abundance: F10: Sample, 3	Abundance: F11: Sample, 4	Abundance: F12: Sample, 4
	B1X6E6 [104-118]	AGDNAPMAYIELVDR		0	2	817.896	58.7763	6		124.9	100.8	74.3			397889	328654	275584	308885	206731	223598
	B1X6E6 [104-118]	AGDNAPMAYIELVDR	1xOxidation [M7]	0	2	825.893	52.8745	8		117.8	108.3	73.9			784414	602298	573956	695953	417125	446148
	B1X6E6 [23-30]	NMAGSLVR		0	2	424.227	32.972	6	8.7	195.2	119.4	76.8		37293.5	983763	710067	508535	513963	310356	348162
	B1X6E6 [46-56]	RVVEPLITLAK		1	2	619.895	44.1173	4	8.4	199.7	120.5	71.5	61424.6	57852.2	1.52137e+06	1.33341e+06	858926	860141	463867	560621
	B1X6E6 [47-56]	VVEPLITLAK		0	2	541.845	49.7567	3	10	181	127	82	159350	149383	3.10044e+06	2.5261e+06	1.95014e+06	1.97517e+06	1.30119e+06	1235078
	B1X6E6 [57-63]	TDSVANR		0	2	381.69	18.6923	3		167.1	105.7	27.2			207031	298737	175395	140895	40905.6	40046.7
	B1X6E6 [70-78]	TRDNEIVAK		1	3	349.192	21.2001	2		143.9	92.6	63.5			605777	515172	378400	341672	232205	262179
	B1X6E6 [79-86]	LFNELGPR		0	2	473.26	41.9809	7	17.8	193.9	113.7	74.6	424164	427738	5029031	4.27466e+06	2.68092e+06	2753751	1732803	1.83491e+06
FALSE	P0A7K6	Large ribosomal subunit protein bL19 [OS=Escherichia coli K-12]	68	9	9	13.1	10.62	38	10	253.1	102.1	34.8	1.11971e+06	832665	2.65659e+07	2.25642e+07	9.75389e+06	1.00048e+07	3.37837e+06	3.35313e+06
	Positions in Master Proteins	Sequence	Modifications	# Missed Cleavages	PSM Charge (by Search Engine): Sequest HT	PSM m/z [Da] (by Search Engine): Sequest HT	PSM RT [min] (by Search Engine): Sequest HT	# PSMs	Abundances (Grouped): 1	Abundances (Grouped): 2	Abundances (Grouped): 3	Abundances (Grouped): 4	Abundance: F5: Sample, 1	Abundance: F6: Sample, 1	Abundance: F7: Sample, 2	Abundance: F8: Sample, 2	Abundance: F9: Sample, 3	Abundance: F10: Sample, 3	Abundance: F11: Sample, 4	Abundance: F12: Sample, 4
	P0A7K6 [15-29]	QDVPSFRPGDTVEVK		0	3	558.621	40.9683	3	10	250.6	107.1	32.3	230356	277801	6907901	5.79445e+06	2.71022e+06	2.69852e+06	801256	827387
	P0A7K6 [30-37]	VWVVEGSK		0	2	452.25	36.4237	2	6.9	266.8	97.9	28.4	56884.4	60250.1	2724385	1.88586e+06	822441	841429	244108	239162
	P0A7K6 [39-51]	RLQAFEGVVIAIR		1	3	491.297	53.4101	4	25.6	231.2	86.2	57	85780.5	65471.5	782407	586039	260566	244587	174754	159577
	P0A7K6 [40-51]	LQAFEGVVIAIR		0	2	658.391	57.9778	8	36.3	206.6	107.7	49.5	496853	319511	2.3619e+06	2.18014e+06	1.10953e+06	1.26005e+06	623669	473468
	P0A7K6 [54-62]	GLHSAFTVR		0	2	494.272	33.016	3	12	246	109.1	33	60126.8	57163.1	1.32852e+06	1.09382e+06	547655	521506	149096	174948
	P0A7K6 [63-72]	KISNGEGVER		1	2	544.787	20.5377	2	6.7	196.5	152.9	44		11472.4	381545	296402	252868	270637	74940.7	75522.4
	P0A7K6 [64-72]	ISNGEGVER		0	2	480.741	22.2206	8	3.2	275	88.9	32.9	16760.2	40995.4	2.47035e+06	2.08422e+06	771265	697819	246730	298717
	P0A7K6 [7-14]	QLEQEQMK		0	2	517.25	24.9953	2
	P0A7K6 [73-87]	VFQTHSPVVDSISVK		0	3	548.297	41.8983	6	5	265.2	98.2	31.5	172949		9.60887e+06	8.64328e+06	3.27934e+06	3.47027e+06	1.06382e+06	1.10435e+06
FALSE	P0A7M6	Large ribosomal subunit protein uL29 [OS=Escherichia coli K-12]	59	4	4	7.3	9.99	38	46.6	224	100.1	29.3	5.07935e+06	6.34495e+06	3.12483e+07	2.3884e+07	1.19264e+07	1.24952e+07	3.38844e+06	3.76144e+06
	Positions in Master Proteins	Sequence	Modifications	# Missed Cleavages	PSM Charge (by Search Engine): Sequest HT	PSM m/z [Da] (by Search Engine): Sequest HT	PSM RT [min] (by Search Engine): Sequest HT	# PSMs	Abundances (Grouped): 1	Abundances (Grouped): 2	Abundances (Grouped): 3	Abundances (Grouped): 4	Abundance: F5: Sample, 1	Abundance: F6: Sample, 1	Abundance: F7: Sample, 2	Abundance: F8: Sample, 2	Abundance: F9: Sample, 3	Abundance: F10: Sample, 3	Abundance: F11: Sample, 4	Abundance: F12: Sample, 4
	P0A7M6 [10-23]	SVEELNTELLNLLR		0	2	821.955	70.8092	13	47.5	230.5	93.9	28.1	1.05262e+06	1.22693e+06	5.48127e+06	5.53833e+06	2.08392e+06	2.41686e+06	717648	627257
	P0A7M6 [30-44]	MQAASGQLQQSHLLK		0	2	820.432	35.8586	5	61.3	193.1	113.4	32.1	1.38757e+06	1.76905e+06	6.31463e+06	3.85288e+06	2.77223e+06	3.02674e+06	717056	938458
	P0A7M6 [30-44]	MQAASGQLQQSHLLK	1xOxidation [M1]	0	2	828.43	33.2874	9	40	232.6	99.7	27.7	1.79669e+06	2.18553e+06	13611005	9.7751e+06	4.90638e+06	4.9793e+06	1.28954e+06	1.4669e+06
	P0A7M6 [55-60]	TLLNEK		0	2	359.211	27.8432	6	34.8	250.3	90.1	24.8	610828	874406	5.84137e+06	4717662	1.96046e+06	1.82146e+06	490913	549936
	P0A7M6 [8-23]	EKSVEELNTELLNLLR		1	3	634.018	66.2155	5	117.5		102.6	79.9	231643	289036			203458	250825	173276	178885
FALSE	P60906	Histidine--tRNA ligase [OS=Escherichia coli K-12]	42	13	13	47	5.91	37	296.8	42.7	44.2	16.4	9.0547e+06	1.04711e+07	1.59366e+06	1.22915e+06	1.38165e+06	1.51971e+06	560803	515997
	Positions in Master Proteins	Sequence	Modifications	# Missed Cleavages	PSM Charge (by Search Engine): Sequest HT	PSM m/z [Da] (by Search Engine): Sequest HT	PSM RT [min] (by Search Engine): Sequest HT	# PSMs	Abundances (Grouped): 1	Abundances (Grouped): 2	Abundances (Grouped): 3	Abundances (Grouped): 4	Abundance: F5: Sample, 1	Abundance: F6: Sample, 1	Abundance: F7: Sample, 2	Abundance: F8: Sample, 2	Abundance: F9: Sample, 3	Abundance: F10: Sample, 3	Abundance: F11: Sample, 4	Abundance: F12: Sample, 4
	P60906 [200-206]	MYTNPLR		0	2	447.728	35.8681	1	241.5	38.8	19.7		149145	209305	28348.6		15815.4	13165.6
	P60906 [243-256]	LLESAGIAYTVNQR		0	2	767.915	45.0176	3	292.2	49.6	39.7	18.5	783853	851129	164036	117361	107581	114274	49003.8	54339
	P60906 [267-287]	TVFEWVTNSLGSQGTVCAGGR	1xCarbamidomethyl [C17]	0	2	1113.53	61.7725	3	240.9	39	20.2		342473	406789	70708.7	51586	37306	26202.7
	P60906 [288-298]	YDGLVEQLGGR		0	2	603.81	44.9346	3	175.6		24.4		1.14937e+06	1.1544e+06			158060	161489
	P60906 [299-311]	ATPAVGFAMGLER		0	2	660.343	51.5436	2	311.8	33.2	39.2	15.9	427933	510216	51316.1	48175.2	59634.7	57830.3	28888.2	19630.9
	P60906 [31-42]	NVLGSYGYSEIR		0	2	679.341	46.208	2	210.9	51.6	37.5		466308	558569	135469	114990	97709.5	84283.8
	P60906 [312-324]	LVLLVQAVNPEFK		0	2	735.44	59.0743	6	281.6	50.4	46.2	21.8	1.1715e+06	1.43111e+06	255246	210613	195643	230885	111223	90287.5
	P60906 [383-400]	VAVVLGESEVANGTAVVK		0	2	871.489	46.9738	2	247.5	60.5	50	41.9	255235	339473	90753.7	57063.5	58112.3	60818.6	45315.4	54899
	P60906 [404-420]	SGEQTAVAQDSVAAHLR		0	3	580.627	37.3673	5	280.5	50.9	47.8	20.8	1.87599e+06	2.24584e+06	429687	322652	299975	407318	166638	139091
	P60906 [43-53]	LPIVEQTPLFK		0	2	642.881	54.2463	2	264.9	68.3	48.3	18.5	487148	455627	125234	117874	77754.6	94994.1	36201.7	29775.4
	P60906 [66-73]	EMYTFEDR	1xOxidation [M2]	0	2	553.727	35.6896	2	179.5			20.5	253446	271773					32811.6	27276.2
	P60906 [74-90]	NGDSLTLRPEGTAGCVR	1xCarbamidomethyl [C15]	0	3	601.631	36.4275	1	178.2		21.8		403144	516869			56801.1	54885.8
	P60906 [91-104]	AGIEHGLLYNQEQR		0	3	543.279	37.5988	5	290.9	44.5	44.8	19.9	1.28915e+06	1.51997e+06	242856	188839	217254	213564	90721.7	100698
FALSE	P0A7R9	Small ribosomal subunit protein uS11 [OS=Escherichia coli K-12]	53	7	7	13.8	11.33	36	11.4	262.9	100.4	25.4	1.40927e+06	1.7466e+06	3.92167e+07	3.34323e+07	1.35237e+07	1.41426e+07	3.54901e+06	3.44022e+06
	Positions in Master Proteins	Sequence	Modifications	# Missed Cleavages	PSM Charge (by Search Engine): Sequest HT	PSM m/z [Da] (by Search Engine): Sequest HT	PSM RT [min] (by Search Engine): Sequest HT	# PSMs	Abundances (Grouped): 1	Abundances (Grouped): 2	Abundances (Grouped): 3	Abundances (Grouped): 4	Abundance: F5: Sample, 1	Abundance: F6: Sample, 1	Abundance: F7: Sample, 2	Abundance: F8: Sample, 2	Abundance: F9: Sample, 3	Abundance: F10: Sample, 3	Abundance: F11: Sample, 4	Abundance: F12: Sample, 4
	P0A7R9 [14-37]	KQVSDGVAHIHASFNNTIVTITDR		1	4	656.597	47.8175	5	5.3	327.8	36.5	30.4	95782.5	65758.5	5.16751e+06	4.68965e+06	695676	432845	464909	447048
	P0A7R9 [15-37]	QVSDGVAHIHASFNNTIVTITDR		0	4	624.571	51.4535	4	1.7	257.1	111.7	29.4	32180.3	30643.6	4.78123e+06	4.74116e+06	1.88954e+06	2.26576e+06	640226	463862
	P0A7R9 [38-53]	QGNALGWATAGGSGFR		0	2	775.379	50.1071	3	44.8	157.6	137.3	60.3	635218	861194	2.8944e+06	2.34005e+06	2.01539e+06	2.54852e+06	1.0312e+06	962225
	P0A7R9 [57-69]	KSTPFAAQVAAER		1	3	459.249	34.5834	2	21.6	62.1	249.3	67	18744.2	27114.5	67521.5	61984	258334	261220	67451.3	72322.6
	P0A7R9 [58-69]	STPFAAQVAAER		0	2	624.323	40.2389	9	6.9	281.7	96.2	15.1	226634	271034	11242151	9153783	3.42035e+06	3.51076e+06	528025	562590
	P0A7R9 [81-87]	NLEVMVK		0	2	416.733	37.1321	3	6.2	254.5	123.1	16.3	53908.5	61063.5	2.79539e+06	2.01619e+06	1.09476e+06	1.20502e+06	143725	160083
	P0A7R9 [81-87]	NLEVMVK	1xOxidation [M5]	0	2	424.731	31.9165	2	12.9	270.1	95.4	21.6	140637	196754	3.70163e+06	3.27923e+06	1273011	1.1903e+06	256734	303275
	P0A7R9 [99-106]	ALNAAGFR		0	2	410.228	34.3856	8	7.8	277.3	99.3	15.7	206168	233041	8566907	7150306	2.87663e+06	2.72816e+06	416733	468818
FALSE	P0AGK4	RNA-binding protein YhbY [OS=Escherichia coli K-12]	53	7	7	10.8	9.38	34	0.5	229.3	131.5	38.7	51672.8	70929.5	2.82184e+07	2.29613e+07	1.42987e+07	1.49094e+07	4.23174e+06	4.36014e+06
	Positions in Master Proteins	Sequence	Modifications	# Missed Cleavages	PSM Charge (by Search Engine): Sequest HT	PSM m/z [Da] (by Search Engine): Sequest HT	PSM RT [min] (by Search Engine): Sequest HT	# PSMs	Abundances (Grouped): 1	Abundances (Grouped): 2	Abundances (Grouped): 3	Abundances (Grouped): 4	Abundance: F5: Sample, 1	Abundance: F6: Sample, 1	Abundance: F7: Sample, 2	Abundance: F8: Sample, 2	Abundance: F9: Sample, 3	Abundance: F10: Sample, 3	Abundance: F11: Sample, 4	Abundance: F12: Sample, 4
	P0AGK4 [1-6]	MNLSTK		0	2	347.184	24.7285	4		148.6	117.2	34.2			1.31605e+06	697936	775964	735559	200135	243145
	P0AGK4 [51-56]	IATEDR		0	2	352.682	19.1274	4		188.8	92.1	19			1.43472e+06	1.41677e+06	707239	684197	124836	165405
	P0AGK4 [51-59]	IATEDRETK		1	2	531.774	18.742	4		149.6	108.4	42			624203	566131	438101	423895	153114	182128
	P0AGK4 [60-68]	TLIVEAIVR		0	2	507.322	51.7163	4	0.8	216.8	139.9	42.6	25767.2	34835.2	8898333	7.67117e+06	4991818	5691600	1.6892e+06	1.55866e+06
	P0AGK4 [69-80]	ETGACNVQVIGK	1xCarbamidomethyl [C5]	0	2	638.321	32.0312	6	0.8	237.9	128.5	32.8	18025.1	25983.8	6.9925e+06	5.75068e+06	3.36619e+06	3.48479e+06	833269	916225
	P0AGK4 [81-89]	TLVLYRPTK		0	2	545.834	35.9337	7		181.4	89.3	29.3			6.96484e+06	5163872	3003196	2.90301e+06	960867	975549
	P0AGK4 [92-97]	KISLPR		1	2	357.237	29.0294	5	1.1	233.9	127.6	37.4	7880.47	10110.6	1.98779e+06	1.69471e+06	1.01623e+06	986332	270324	319030
FALSE	B1X6G6	Large ribosomal subunit protein uL22 [OS=Escherichia coli str. K-12 substr. DH10B]	59	8	8	12.2	10.23	34	10.4	253.4	112.4	23.8	1.11929e+06	1.19646e+06	3.12916e+07	2.54498e+07	1.22584e+07	1.27948e+07	2.5079e+06	2.80715e+06
	Positions in Master Proteins	Sequence	Modifications	# Missed Cleavages	PSM Charge (by Search Engine): Sequest HT	PSM m/z [Da] (by Search Engine): Sequest HT	PSM RT [min] (by Search Engine): Sequest HT	# PSMs	Abundances (Grouped): 1	Abundances (Grouped): 2	Abundances (Grouped): 3	Abundances (Grouped): 4	Abundance: F5: Sample, 1	Abundance: F6: Sample, 1	Abundance: F7: Sample, 2	Abundance: F8: Sample, 2	Abundance: F9: Sample, 3	Abundance: F10: Sample, 3	Abundance: F11: Sample, 4	Abundance: F12: Sample, 4
	B1X6G6 [100-110]	TSHITVVVSDR		0	2	607.331	30.9331	9	5.4	256	112.6	26.1	98969.3	75748.3	4.46909e+06	3.81835e+06	1.74465e+06	1.89194e+06	351284	503265
	B1X6G6 [19-25]	LVADLIR		0	2	400.257	42.551	2	7.2	250.4	121.1	21.3	100472	116831	4.09678e+06	3478379	1870645	1.78029e+06	316375	327150
	B1X6G6 [29-41]	VSQALDILTYTNK		0	2	733.398	52.3371	4	6.6	265.4	110.7	17.3	51973.8	61359	2.54408e+06	2.0457e+06	867215	1.04342e+06	158445	140293
	B1X6G6 [29-42]	VSQALDILTYTNKK		1	2	797.445	47.5431	3	4.7	248.1	125.6	21.6	45233.3	54562.7	2.92757e+06	2.37169e+06	1.26661e+06	1.40513e+06	232081	227204
	B1X6G6 [49-70]	KVLESAIANAEHNDGADIDDLK		1	3	780.057	45.314	2		133.4	66.6				1.2183e+06	897428	505623	540030
	B1X6G6 [50-70]	VLESAIANAEHNDGADIDDLK		0	2	1105.53	47.6369	2	8	278.5	98.8	14.7	108684	74405	3.51194e+06	2.78276e+06	1.08833e+06	1.12927e+06	181195	150387
	B1X6G6 [74-83]	IFVDEGPSMK		0	2	561.779	39.7298	4	3.4	242.3	131	23.2	31500	39414.8	2.81368e+06	2.17964e+06	1.32111e+06	1.3574e+06	228665	245208
	B1X6G6 [74-83]	IFVDEGPSMK	1xOxidation [M9]	0	2	569.776	34.6838	4	20.8	230.8	116.7	31.7	417471	507905	5733617	4576024	2.55414e+06	2.6272e+06	663866	744759
	B1X6G6 [99-110]	RTSHITVVVSDR		1	3	457.257	27.4474	4	19.9	271.4	77.2	31.5	264989	266235	3.97658e+06	3.29979e+06	1040121	1.02008e+06	375990	468884
FALSE	C5A0A3	Large ribosomal subunit protein bL31 [OS=Escherichia coli BW2952]	63	4	4	7.9	9.32	33	20.3	255.5	104.4	19.7	1.05566e+06	1.2563e+06	1.57109e+07	1.33175e+07	5.89134e+06	5.93196e+06	1.13361e+06	1.09281e+06
	Positions in Master Proteins	Sequence	Modifications	# Missed Cleavages	PSM Charge (by Search Engine): Sequest HT	PSM m/z [Da] (by Search Engine): Sequest HT	PSM RT [min] (by Search Engine): Sequest HT	# PSMs	Abundances (Grouped): 1	Abundances (Grouped): 2	Abundances (Grouped): 3	Abundances (Grouped): 4	Abundance: F5: Sample, 1	Abundance: F6: Sample, 1	Abundance: F7: Sample, 2	Abundance: F8: Sample, 2	Abundance: F9: Sample, 3	Abundance: F10: Sample, 3	Abundance: F11: Sample, 4	Abundance: F12: Sample, 4
	C5A0A3 [26-39]	STVGHDLNLDVCSK	1xCarbamidomethyl [C12]	0	2	772.873	38.2062	10	21.8	243.7	112.4	22.1	673191	775492	9.00103e+06	7.23295e+06	3.67401e+06	3.76756e+06	759654	706374
	C5A0A3 [40-47]	CHPFFTGK	1xCarbamidomethyl [C1]	0	2	497.235	32.2304	12	18.8	285.1	80.5	15.7	154119	201661	2.91696e+06	2.45809e+06	770092	742111	140750	154380
	C5A0A3 [50-56]	DVATGGR		0	2	338.175	18.413	2	2.5	302.4	88	7.1	5689.69	7849.57	530704	1.27967e+06	290338	198149	23238.5	16218
	C5A0A3 [9-23]	YEEITASCSCGNVMK	2xCarbamidomethyl [C8; C10]	0	2	874.867	37.7038	4	26.7	229.9	121.9	21.5	95727.4	113193	1.06568e+06	753424	456941	494376	88311.1	79639
	C5A0A3 [9-23]	YEEITASCSCGNVMK	2xCarbamidomethyl [C8; C10]; 1xOxidation [M14]	0	2	882.867	32.8705	5	19.8	262	100.1	18	126937	158102	2.19657e+06	1.59335e+06	699954	729758	121658	136202
FALSE	P07012	Peptide chain release factor RF2 [OS=Escherichia coli K-12]	32	9	9	41.2	4.75	33	172.4	121.1	80	26.5	2.51456e+06	3.08507e+06	2.09398e+06	1.82902e+06	1.24467e+06	1.34279e+06	435282	419900
	Positions in Master Proteins	Sequence	Modifications	# Missed Cleavages	PSM Charge (by Search Engine): Sequest HT	PSM m/z [Da] (by Search Engine): Sequest HT	PSM RT [min] (by Search Engine): Sequest HT	# PSMs	Abundances (Grouped): 1	Abundances (Grouped): 2	Abundances (Grouped): 3	Abundances (Grouped): 4	Abundance: F5: Sample, 1	Abundance: F6: Sample, 1	Abundance: F7: Sample, 2	Abundance: F8: Sample, 2	Abundance: F9: Sample, 3	Abundance: F10: Sample, 3	Abundance: F11: Sample, 4	Abundance: F12: Sample, 4
	P07012 [11-17]	IQDLTER		0	2	437.735	28.3514	2	138.6	146.6	87.7	27.1	265066	445295	403138	327325	220171	214526	58227	77565.2
	P07012 [110-116]	LAQLEFR		0	2	438.752	42.4383	6	186.8	117.2	72.2	23.8	498059	554978	351185	309495	202808	203541	65598.5	68547.5
	P07012 [163-177]	TEIIEESEGEVAGIK		0	2	802.408	46.7044	6	166.6	112.6	84.8	36	331633	402406	283662	214851	171819	201309	83956.8	74065.4
	P07012 [214-240]	HTSFSSAFVYPEVDDDIDIEINPADLR		0	3	1022.49	63.6692	1	188.5	61.2	78.5	71.9	52611.2	135316	31374.5	23901.8	26715.3	46207.5	32182.3
	P07012 [23-30]	GYLDYDAK		0	2	472.722	37.1389	4	173.1	128.9	78.7	19.3	254269	257693	221133	164268	112741	120017	28508.2	28567.7
	P07012 [263-278]	ITHIPTGIVTQCQNDR	1xCarbamidomethyl [C12]	0	3	618.317	38.8143	6	172.6	131.4	75.6	20.4	479749	529538	428196	343850	209660	232203	56635.1	62794.8
	P07012 [315-324]	SDIGWGSQIR		0	2	559.784	42.694	1	181.8	112.3	82	24	185784	230823		127880	91389.6	95404.3	28973.8	25756.3
	P07012 [325-332]	SYVLDDSR		0	2	477.73	32.7186	4	165.8	127.4	83.2	23.7	247808	273966	218755	183313	125993	135712	35215.6	39326.5
	P07012 [344-362]	NTQAVLDGSLDQFIEASLK		0	2	1025.03	70.8418	3	179.2	115.1	70.3	35.4	199586	255053	156537	134132	83370.4	93868.3	45984.3	43276.2
FALSE	P0A7S3	Small ribosomal subunit protein uS12 [OS=Escherichia coli K-12]	52	6	6	13.7	10.87	32	2.5	275.2	104.7	17.6	228333	251102	2.8939e+07	2.33525e+07	1.00512e+07	9.73128e+06	1.61151e+06	1.72155e+06
	Positions in Master Proteins	Sequence	Modifications	# Missed Cleavages	PSM Charge (by Search Engine): Sequest HT	PSM m/z [Da] (by Search Engine): Sequest HT	PSM RT [min] (by Search Engine): Sequest HT	# PSMs	Abundances (Grouped): 1	Abundances (Grouped): 2	Abundances (Grouped): 3	Abundances (Grouped): 4	Abundance: F5: Sample, 1	Abundance: F6: Sample, 1	Abundance: F7: Sample, 2	Abundance: F8: Sample, 2	Abundance: F9: Sample, 3	Abundance: F10: Sample, 3	Abundance: F11: Sample, 4	Abundance: F12: Sample, 4
	P0A7S3 [100-110]	GALDCSGVKDR	1xCarbamidomethyl [C5]	1	3	393.192	25.5268	3		212	73.6	14.4			454148	341360	138037	135191	22351.8	32165.3
	P0A7S3 [19-30]	SNVPALEACPQK	1xCarbamidomethyl [C9]	0	2	657.33	34.6011	10	1.9	299.1	89.3	9.6	40079.1	70034.5	9515060	7350201	2492028	2.50198e+06	265057	274333
	P0A7S3 [19-31]	SNVPALEACPQKR	1xCarbamidomethyl [C9]	1	3	490.589	31.3094	8	2.1	177.5	188.9	31.6		15962.4	1.48354e+06	1.27157e+06	1.49314e+06	1.43099e+06	211020	283243
	P0A7S3 [37-43]	VYTTTPK		0	2	405.223	22.8068	5	0.7	283.5	100.7	15.1	12474.8	25490.1	8854026	6.58058e+06	2.74899e+06	2.67432e+06	369443	447013
	P0A7S3 [44-50]	KPNSALR		0	2	393.234	18.3725	3	0.4	286.4	100.3	12.9	6455.36	14218.6	6.97132e+06	6693172	2474728	2.31076e+06	281977	334695
	P0A7S3 [57-83]	LTNGFEVTSYIGGEGHNLQEHSVILIR		0	4	746.637	57.126	3	22.4	209.4	106.3	61.8	169324	125397	1.66093e+06	1.11565e+06	704302	678034	461664	350096
FALSE	C4ZUG4	Large ribosomal subunit protein uL24 [OS=Escherichia coli BW2952]	69	9	9	11.3	10.21	32	33.6	234.9	109.3	22.2	3.64147e+06	2.39714e+06	2.22711e+07	1.92067e+07	9.53981e+06	9.70726e+06	2.01211e+06	1.89752e+06
	Positions in Master Proteins	Sequence	Modifications	# Missed Cleavages	PSM Charge (by Search Engine): Sequest HT	PSM m/z [Da] (by Search Engine): Sequest HT	PSM RT [min] (by Search Engine): Sequest HT	# PSMs	Abundances (Grouped): 1	Abundances (Grouped): 2	Abundances (Grouped): 3	Abundances (Grouped): 4	Abundance: F5: Sample, 1	Abundance: F6: Sample, 1	Abundance: F7: Sample, 2	Abundance: F8: Sample, 2	Abundance: F9: Sample, 3	Abundance: F10: Sample, 3	Abundance: F11: Sample, 4	Abundance: F12: Sample, 4
	C4ZUG4 [27-33]	NVLSSGK		0	2	352.7	22.5235	3	4	252.1	111.7	32.2	10847.9	41133.3	1.47344e+06	1177389	578078	588927	155884	181277
	C4ZUG4 [34-43]	VIVEGINLVK		0	2	542.343	48.5103	4	5.7	262.1	118	14.2	133541	152493	6687848	6.40773e+06	2.97246e+06	2.92029e+06	343310	368971
	C4ZUG4 [44-61]	KHQKPVPALNQPGGIVEK		1	4	485.782	30.0849	4		222.9	63	14.1			1.5533e+06	1.26657e+06	411983	381650	80262.5	97559.4
	C4ZUG4 [45-61]	HQKPVPALNQPGGIVEK		0	3	604.676	32.7346	3	7.3	264.3	112.9	15.5	54186.3	75081.8	2.53291e+06	2.08328e+06	944082	1.02021e+06	128482	141282
	C4ZUG4 [5-17]	IRRDDEVIVLTGK		2	3	505.295	36.179	2	16.7	246	114.5	22.7	206185	141874	2.80346e+06	2257181	1.15497e+06	1.18772e+06	232588	231919
	C4ZUG4 [62-79]	EAAIQVSNVAIFNAATGK		0	2	902.484	55.06	11	115.3	155.8	94.4	34.5	3.1382e+06	1.86554e+06	3.58362e+06	2.98319e+06	1.9161e+06	2.04544e+06	834941	627264
	C4ZUG4 [7-17]	RDDEVIVLTGK		1	2	622.846	38.0342	1	8.8	250.7	121.2	19.3	42584.1	43939.1	1.42947e+06	1.07247e+06	590046	606678	87830	103771
	C4ZUG4 [8-17]	DDEVIVLTGK		0	2	544.795	43.4998	2	10.8	257	112.9	19.4	55919.4	77079	1.69895e+06	1.43511e+06	683583	687875	116364	118918
	C4ZUG4 [87-92]	FEDGKK		1	2	362.187	17.6267	2		187.9	101.4	10.7			508108	523824	288516	268481	32443.8	26558.1
FALSE	C4ZXF0	Glycine--tRNA ligase alpha subunit [OS=Escherichia coli BW2952]	28	7	7	34.7	5.05	31	162	130.2	86.5	21.3	3.70441e+06	4.24019e+06	3687135	2.75279e+06	2.06142e+06	2.17117e+06	474258	574448
	Positions in Master Proteins	Sequence	Modifications	# Missed Cleavages	PSM Charge (by Search Engine): Sequest HT	PSM m/z [Da] (by Search Engine): Sequest HT	PSM RT [min] (by Search Engine): Sequest HT	# PSMs	Abundances (Grouped): 1	Abundances (Grouped): 2	Abundances (Grouped): 3	Abundances (Grouped): 4	Abundance: F5: Sample, 1	Abundance: F6: Sample, 1	Abundance: F7: Sample, 2	Abundance: F8: Sample, 2	Abundance: F9: Sample, 3	Abundance: F10: Sample, 3	Abundance: F11: Sample, 4	Abundance: F12: Sample, 4
	C4ZXF0 [104-115]	ELGMDPTIHDIR		0	3	466.234	41.8808	1	200.8	125	59.4	14.9	446148	412612	295043	242007	120382	133648	32580.8	30955.9
	C4ZXF0 [229-247]	EAQQLLALENPLPLPAYER		0	2	1083.09	62.1244	9	178.1	109.4	84.2	28.2	567830	657761	456991	308388	259261	321875	105344	88962.2
	C4ZXF0 [251-261]	AAHSFNLLDAR		0	2	607.819	42.7963	7	162	135.1	78.7	24.3	748145	917801	784209	608867	403515	401606	117782	131295
	C4ZXF0 [282-291]	AVAEAYYASR		0	2	550.773	32.8263	6	155.1	139.5	83.2	22.2	829098	936527	922958	680538	467577	477633	115247	137735
	C4ZXF0 [292-301]	EALGFPMCNK	1xOxidation [M7]; 1xCarbamidomethyl [C8]	0	2	591.768	38.9415	1	161.2	135.2	83.4	20.2	427493	418130	402559	312644	201708	237055	52565.1	53497.1
	C4ZXF0 [48-63]	ALGPEPMAAAYVQPSR		0	2	829.423	46.6048	2	181.8	110.1	82.6	25.5	166962	206331	132993	94955.9	77856	91262.2	28135.7	24088.5
	C4ZXF0 [48-63]	ALGPEPMAAAYVQPSR	1xOxidation [M7]	0	2	837.419	40.7329	4	155.6	113	110.6	20.8	480947	633552	483483	332705	402002	383340		73649
	C4ZXF0 [70-76]	YGENPNR		0	2	425.197	20.3635	1	47.6	194.2	129.7	28.4	37790.1	57478.7	208898	172688	129123	124754	22603	34266.2
FALSE	P00956	Isoleucine--tRNA ligase [OS=Escherichia coli K-12]	16	12	12	104.2	6.01	29	190.2	122.8	51.6	35.3	3.27621e+06	3.79742e+06	2.53675e+06	2.04521e+06	981652	932164	640048	670789
	Positions in Master Proteins	Sequence	Modifications	# Missed Cleavages	PSM Charge (by Search Engine): Sequest HT	PSM m/z [Da] (by Search Engine): Sequest HT	PSM RT [min] (by Search Engine): Sequest HT	# PSMs	Abundances (Grouped): 1	Abundances (Grouped): 2	Abundances (Grouped): 3	Abundances (Grouped): 4	Abundance: F5: Sample, 1	Abundance: F6: Sample, 1	Abundance: F7: Sample, 2	Abundance: F8: Sample, 2	Abundance: F9: Sample, 3	Abundance: F10: Sample, 3	Abundance: F11: Sample, 4	Abundance: F12: Sample, 4
	P00956 [128-138]	EYAATQVDGQR		0	2	619.294	28.191	2	155.1	142.8	61.4	40.7	147484	287120	215880	166224	81284	81753.7	49835.4	58510
	P00956 [193-205]	SALAEAEVEYYDK		0	2	744.349	46.2693	3	179	128.1	52.8	40.1	347242	371586	306549	215453	102260	109573	83208.6	77934.7
	P00956 [276-284]	DLVESVMQR		0	2	538.773	48.1746	3	143.6	110.1	46.3		296890	288233	212509	236474	95049.7	93595.3
	P00956 [379-390]	ANDIVVALLQEK		0	2	656.877	59.9741	5	189.7	109.2	55.7	45.3	494382	558058	345730	264590	139631	170489	122829	128187
	P00956 [452-466]	IESMVANRPDWCISR	1xOxidation [M4]; 1xCarbamidomethyl [C12]	0	3	617.296	40.2196	1	203.8	115	44.9	36.3	156126	193879	110248	87487.2	36047.3	40675.9	30912.9	31132.6
	P00956 [515-526]	EILGDEADQYVK		0	2	690.339	43.7762	1	164.2	137.2	57.6	40.9	269193	330983	268315	231801	104624	104785	73603.7	75212.9
	P00956 [588-601]	QVLTHGFTVDGQGR		0	3	505.598	37.3896	1
	P00956 [620-626]	LGADILR		0	2	379.232	39.1609	2	134.5	65.5			329198	322180	178743	140685
	P00956 [702-714]	AYEAYDFHEVVQR		0	3	542.922	43.0953	4	205.7	105.1	50.6	38.6	312094	419125	218035	156671	98265.7	80631.2	64465.1	71322.6
	P00956 [852-860]	LTALGDELR		0	2	494.276	41.2692	3	187.4	121	53.4	38.2	597597	637051	450226	352367	213106	145133	123214	128041
	P00956 [861-887]	FVLLTSGATVADYNDAPADAQQSEVLK		0	3	941.808	56.6241	3	182.3	117.1	51.4	49.3	214368	214884	147140	129138	61341.7	59664.3	57682.3	58374.6
	P00956 [914-923]	VAEHAEICGR	1xCarbamidomethyl [C8]	0	3	381.186	23.929	1	186.9	98.1	64.2	50.9	111641	174321	83377.6	64322	50043.4	45863.2	34296.2	42074
FALSE	P0A7N4	Large ribosomal subunit protein bL32 [OS=Escherichia coli K-12]	61	4	4	6.4	11.03	28	5.5	275.3	91.8	27.5	299716	224216	1.47252e+07	1.1358e+07	4.49285e+06	4.13538e+06	1.22702e+06	1.35552e+06
	Positions in Master Proteins	Sequence	Modifications	# Missed Cleavages	PSM Charge (by Search Engine): Sequest HT	PSM m/z [Da] (by Search Engine): Sequest HT	PSM RT [min] (by Search Engine): Sequest HT	# PSMs	Abundances (Grouped): 1	Abundances (Grouped): 2	Abundances (Grouped): 3	Abundances (Grouped): 4	Abundance: F5: Sample, 1	Abundance: F6: Sample, 1	Abundance: F7: Sample, 2	Abundance: F8: Sample, 2	Abundance: F9: Sample, 3	Abundance: F10: Sample, 3	Abundance: F11: Sample, 4	Abundance: F12: Sample, 4
	P0A7N4 [17-32]	RSHDALTAVTSLSVDK		1	3	567.304	41.1013	3		231.7	53.6	14.7			1.22981e+06	951892	270270	231494	73109.1	64599.5
	P0A7N4 [18-32]	SHDALTAVTSLSVDK		0	3	515.27	45.1015	12	6.4	271.6	99.2	22.8	239076	150546	8.91669e+06	7.21137e+06	3.06984e+06	2.79257e+06	638924	707422
	P0A7N4 [2-10]	AVQQNKPTR		0	3	347.865	17.3383	5	1.5	190.8	105.3	102.5		2758.47	397522	320883	203241	191316	168461	218433
	P0A7N4 [41-50]	HHITADGYYR		0	3	411.531	26.999	8	5.4	287.5	77.5	29.5	60639.6	70911.8	4.18115e+06	2.87389e+06	949501	919996	346527	365061
FALSE	C4ZSJ8	Methionine--tRNA ligase [OS=Escherichia coli BW2952]	22	11	11	76.2	5.86	24	224.1	117.2	43.9	14.7	2.59556e+06	3.15655e+06	1.69751e+06	1.32022e+06	534218	589064	206484	171523
	Positions in Master Proteins	Sequence	Modifications	# Missed Cleavages	PSM Charge (by Search Engine): Sequest HT	PSM m/z [Da] (by Search Engine): Sequest HT	PSM RT [min] (by Search Engine): Sequest HT	# PSMs	Abundances (Grouped): 1	Abundances (Grouped): 2	Abundances (Grouped): 3	Abundances (Grouped): 4	Abundance: F5: Sample, 1	Abundance: F6: Sample, 1	Abundance: F7: Sample, 2	Abundance: F8: Sample, 2	Abundance: F9: Sample, 3	Abundance: F10: Sample, 3	Abundance: F11: Sample, 4	Abundance: F12: Sample, 4
	C4ZSJ8 [105-113]	QLSELIYSR		0	2	554.804	44.8843	4	201.3	124.4	49.1	25.2	318777	386974	240988	195462	83873.3	87541	41803.3	46237.2
	C4ZSJ8 [176-186]	SVVSGATPVMR		0	2	552.298	35.0928	2	188.3	77.4	34.3		199379	242065	104843	77780.1	41138.3	38920.3
	C4ZSJ8 [208-218]	SGALQEQVANK		0	2	572.802	27.3407	4	167.5	157.9	53.9	20.6	257615	484617	365595	303447	108200	119587	36528.6	51526.2
	C4ZSJ8 [235-249]	DAPYFGFEIPNAPGK		0	2	811.898	59.7301	2	146.1	115.8	38.2		198142	215669	186712	143763	51533.9	56694
	C4ZSJ8 [344-357]	ASTWLNHFDADSLR		0	3	544.93	51.3252	2	232.2	105.6	40.3	21.9	247527	319936	140042	116853	44798.3	53174	26599.1
	C4ZSJ8 [368-381]	IDDIDLNLEDFVQR		0	2	852.921	63.2436	3	215	123.1	43.3	18.6	245125	310528	173390	143893	49166.5	62890.1	21715.8	26128.1
	C4ZSJ8 [404-420]	RFDGVLASELADPQLYK		1	3	641.34	55.3868	1	206.5	121.3	46.2	26	189604	201921	129427	102019	41601.4	46156.6	30625.6	19848.2
	C4ZSJ8 [455-466]	YVDEQAPWVVAK		0	2	702.862	46.9923	2	212.2	121.4	46.5	19.8	278189	289268	180700	145746	67880.7	57034.1	25286.9	27783.3
	C4ZSJ8 [503-524]	AEAFLNTELTWDGIQQPLLGHK		0	3	827.764	62.5447	2	186.1	84.9	29		148192	188531	76194.9			26034.7
	C4ZSJ8 [601-609]	LTLDLGGEK		0	2	473.267	43.5847	1	100				257353	257826
	C4ZSJ8 [660-677]	DIFLLSPDAGAKPGHQVK		0	3	631.678	45.621	1	245.1	90.8	41.4	22.8	255658	259215	99617.8	91253.9	46025.5	41032.3	23925.1
FALSE	P0ACQ4	DNA-binding transcriptional dual regulator OxyR [OS=Escherichia coli K-12]	30	8	8	34.3	6.4	23	140.9	164.5	65.6	29	2.6032e+06	2.88677e+06	3.54868e+06	2.88572e+06	1.23114e+06	1.32267e+06	560309	568743
	Positions in Master Proteins	Sequence	Modifications	# Missed Cleavages	PSM Charge (by Search Engine): Sequest HT	PSM m/z [Da] (by Search Engine): Sequest HT	PSM RT [min] (by Search Engine): Sequest HT	# PSMs	Abundances (Grouped): 1	Abundances (Grouped): 2	Abundances (Grouped): 3	Abundances (Grouped): 4	Abundance: F5: Sample, 1	Abundance: F6: Sample, 1	Abundance: F7: Sample, 2	Abundance: F8: Sample, 2	Abundance: F9: Sample, 3	Abundance: F10: Sample, 3	Abundance: F11: Sample, 4	Abundance: F12: Sample, 4
	P0ACQ4 [141-150]	LDCVILALVK	1xCarbamidomethyl [C3]	0	2	572.344	59.8823	4	121.8	188.9	65.9	23.4	476424	510469	837089	698668	249635	285272	93762.4	95622.2
	P0ACQ4 [191-201]	LLMLEDGHCLR	1xOxidation [M3]; 1xCarbamidomethyl [C9]	0	3	458.23	40.5247	2	127.7	172.1	69.6	30.7	201178	278818	367831	277026	135703	122689	53719.5	60266.5
	P0ACQ4 [21-37]	AADSCHVSQPTLSGQIR	1xCarbamidomethyl [C5]	0	3	609.632	34.5364	2	155	150.6	64.2	30.2	767706	824649	891061	670295	319648	339732	142946	168430
	P0ACQ4 [267-279]	TIGLVYRPGSPLR		0	3	476.949	44.3115	2	134.4	172.4	61.2	32	217484	260377	323146	288626	115758	101591	61852.3	51862.9
	P0ACQ4 [38-50]	KLEDELGVMLLER		1	3	515.617	58.2141	2	152.4	146.4	62.9	38.3	176335	186844	183646	165650	68829.9	81448.2	41246.2	50427.8
	P0ACQ4 [5-16]	DLEYLVALAEHR		0	2	714.878	62.7345	8	154.5	157.8	62.6	25.1	502554	541952	606809	468613	206459	216757	90064.4	79788.7
	P0ACQ4 [54-69]	KVLFTQAGMLLVDQAR	1xOxidation [M9]	1	3	602.67	51.7302	1	144.2	120.5	85.8	49.5	154588	170437	134656	136626	82143.2	113527	49824.5	62344.9
	P0ACQ4 [55-69]	VLFTQAGMLLVDQAR	1xOxidation [M8]	0	2	839.454	58.1264	2	114	198.9	59.2	27.9	106928	113226	204445	180217	52964.7	61650	26893.7
FALSE	P23882	Methionyl-tRNA formyltransferase [OS=Escherichia coli K-12]	30	6	6	34.1	5.76	23	130.2	147.7	83.8	38.2	1.5653e+06	1.683e+06	2.06537e+06	1.64142e+06	996424	1.09495e+06	479210	473977
	Positions in Master Proteins	Sequence	Modifications	# Missed Cleavages	PSM Charge (by Search Engine): Sequest HT	PSM m/z [Da] (by Search Engine): Sequest HT	PSM RT [min] (by Search Engine): Sequest HT	# PSMs	Abundances (Grouped): 1	Abundances (Grouped): 2	Abundances (Grouped): 3	Abundances (Grouped): 4	Abundance: F5: Sample, 1	Abundance: F6: Sample, 1	Abundance: F7: Sample, 2	Abundance: F8: Sample, 2	Abundance: F9: Sample, 3	Abundance: F10: Sample, 3	Abundance: F11: Sample, 4	Abundance: F12: Sample, 4
	P23882 [105-117]	LGCINVHGSLLPR	1xCarbamidomethyl [C3]	0	3	479.267	44.9861	1	159.2	128	81.8	30.9	188406	181102	169034	130626	101578	88791.6	29430.5	43808.7
	P23882 [172-185]	LAELGPQGLITTLK		0	2	727.435	56.529	6	132.9	158.5	79.8	28.7	322557	367883	462513	364877	187736	227891	77457.1	71309.4
	P23882 [19-43]	HLDALLSSGHNVVGVFTQPDRPAGR		0	4	661.6	49.7387	4	93.6	173.9	77.2	55.3	162738	148388	319867	260472	130317	126073	92824.8	90779.1
	P23882 [215-226]	IDWSLSAAQLER		0	2	694.862	54.6642	2	162.3	132.6	76.3	28.8	186136	211677	182330	144319	84801.5	102836	37192.9	33252.3
	P23882 [251-270]	ASVIDTATNAAPGTILEANK		0	2	979.016	49.3538	3	125.2	147	89.5	38.3	231650	243986	312618	249136	161304	179110	68971.8	76855.1
	P23882 [7-18]	IIFAGTPDFAAR		0	2	639.847	51.9105	7	127.8	140.7	89.2	42.2	473808	529966	619004	491992	330687	370247	173333	157972
FALSE	C4ZUF7	Large ribosomal subunit protein uL30 [OS=Escherichia coli BW2952]	58	5	5	6.5	10.96	22	6.4	294.8	68.3	30.5	528095	607106	2.80627e+07	24366238	5.93561e+06	6.17947e+06	2.52648e+06	2.90073e+06
	Positions in Master Proteins	Sequence	Modifications	# Missed Cleavages	PSM Charge (by Search Engine): Sequest HT	PSM m/z [Da] (by Search Engine): Sequest HT	PSM RT [min] (by Search Engine): Sequest HT	# PSMs	Abundances (Grouped): 1	Abundances (Grouped): 2	Abundances (Grouped): 3	Abundances (Grouped): 4	Abundance: F5: Sample, 1	Abundance: F6: Sample, 1	Abundance: F7: Sample, 2	Abundance: F8: Sample, 2	Abundance: F9: Sample, 3	Abundance: F10: Sample, 3	Abundance: F11: Sample, 4	Abundance: F12: Sample, 4
	C4ZUF7 [22-30]	ATLLGLGLR		0	2	457.295	52.5512	3	6.4	301.7	67	24.9	167563	162946	8316289	7392890	1.59658e+06	1.90045e+06	596960	704314
	C4ZUF7 [32-38]	IGHTVER		0	2	406.225	19.2985	2	3.2	291.1	77.6	28.1	10303.5	25337.1	1.44999e+06	1.49363e+06	400345	384337	141448	142507
	C4ZUF7 [32-45]	IGHTVEREDTPAIR		1	4	399.215	27.8478	4	6.3	303.7	59.6	30.5	137076	121536	6.78801e+06	5732426	1.32748e+06	1.1282e+06	526501	743585
	C4ZUF7 [39-45]	EDTPAIR		0	2	401.208	26.0594	3	3	305.4	64.3	27.2	11440.4	31976.4	2.06839e+06	1.77603e+06	419674	388496	164857	177318
	C4ZUF7 [46-56]	GMINAVSFMVK		0	2	598.813	56.3488	2	8.3	263.9	85.3	42.4	45077.8	38654.9	1.41599e+06	1251772	411126	450615	216256	211929
	C4ZUF7 [46-56]	GMINAVSFMVK	1xOxidation [M]	0	2	606.81	50.096	4	2.7	292.4	72.5	32.4	16979.1	57904.8	3.66013e+06	3.09618e+06	757736	918826	368546	378752
	C4ZUF7 [46-56]	GMINAVSFMVK	2xOxidation [M2; M9]	0	2	614.809	43.5632	4	10.8	280.4	71.6	37.2	139655	168751	4363938	3.62331e+06	1.02267e+06	1.00854e+06	511913	542329
FALSE	P0A8M0	Asparagine--tRNA ligase [OS=Escherichia coli K-12]	20	8	8	52.5	5.31	21	229.2	92.9	48.8	29.1	3.39482e+06	3.70538e+06	1.62274e+06	1.27287e+06	741604	770536	440615	460576
	Positions in Master Proteins	Sequence	Modifications	# Missed Cleavages	PSM Charge (by Search Engine): Sequest HT	PSM m/z [Da] (by Search Engine): Sequest HT	PSM RT [min] (by Search Engine): Sequest HT	# PSMs	Abundances (Grouped): 1	Abundances (Grouped): 2	Abundances (Grouped): 3	Abundances (Grouped): 4	Abundance: F5: Sample, 1	Abundance: F6: Sample, 1	Abundance: F7: Sample, 2	Abundance: F8: Sample, 2	Abundance: F9: Sample, 3	Abundance: F10: Sample, 3	Abundance: F11: Sample, 4	Abundance: F12: Sample, 4
	P0A8M0 [131-139]	TNLIGAVAR		0	2	457.774	39.3548	3	225.3	92.4	48.4	33.9	394183	434591	195999	147110	91611.1	86220.7	59673.6	65199.7
	P0A8M0 [14-23]	VAVDSEVTVR		0	2	537.794	33.683	1	218.4	106.4	45.8	29.4	545212	560865	296723	244545	111548	120346	71891	76977.6
	P0A8M0 [179-189]	VSTLDLENLPR		0	2	628.846	49.7385	4	211.5	97.8	55.7	34.9	448670	435258	229949	181653	113695	119156	68592.6	77623.4
	P0A8M0 [226-234]	IYTFGPTFR		0	2	551.289	50.2094	3	245.7	73.6	47.7	32.9	401445	521124	168698	111298	85191	92551	58826.4	63832.2
	P0A8M0 [426-440]	YGTVPHSGFGLGFER		0	3	541.936	46.935	1	192.4	72.7	34.9		258725	308162	123058	92461.6	50297.8	52267.8
	P0A8M0 [441-452]	LIAYVTGVQNVR		0	2	666.886	45.143	3	210.5	108.1	50.6	30.8	459158	473164	265134	216135	113479	110725	70920	65578.5
	P0A8M0 [68-79]	LTTGCSVIVTGK	1xCarbamidomethyl [C5]	0	2	618.338	35.6691	2	252.6	70.9	50.2	26.3	468811	506041	151740	123081	90175.7	103844	51542.4	49909
	P0A8M0 [80-96]	VVASPGQGQQFEIQASK		0	2	887.461	39.56	4	232.3	91	45	31.7	418614	466174	191438	156587	85606.6	85426.6	59169.3	61455.6
FALSE	P69222	Translation initiation factor IF-1 [OS=Escherichia coli K-12]	47	3	3	8.2	9.25	19	100.7	199.2	77.8	22.3	3.11839e+06	3.34871e+06	7.02382e+06	5.81775e+06	2.42348e+06	2.57128e+06	691043	737843
	Positions in Master Proteins	Sequence	Modifications	# Missed Cleavages	PSM Charge (by Search Engine): Sequest HT	PSM m/z [Da] (by Search Engine): Sequest HT	PSM RT [min] (by Search Engine): Sequest HT	# PSMs	Abundances (Grouped): 1	Abundances (Grouped): 2	Abundances (Grouped): 3	Abundances (Grouped): 4	Abundance: F5: Sample, 1	Abundance: F6: Sample, 1	Abundance: F7: Sample, 2	Abundance: F8: Sample, 2	Abundance: F9: Sample, 3	Abundance: F10: Sample, 3	Abundance: F11: Sample, 4	Abundance: F12: Sample, 4
	P69222 [24-39]	VELENGHVVTAHISGK		0	3	563.969	33.6553	8	110.5	192.5	74.8	22.2	1.28537e+06	1.39187e+06	2.61496e+06	2.07456e+06	908885	900442	256051	283089
	P69222 [47-52]	ILTGDK		0	2	323.692	21.6074	4	37.8	242.1	98.1	22	90909.9	122882	699937	653213	277422	270357	60410.7	62356.3
	P69222 [53-64]	VTVELTPYDLSK		0	2	682.87	49.3668	7	104	197	76.6	22.3	1.74211e+06	1.83396e+06	3.70893e+06	3.08997e+06	1.23718e+06	1.40048e+06	374581	392398
FALSE	B1XD64	Proline--tRNA ligase [OS=Escherichia coli str. K-12 substr. DH10B]	19	8	8	63.7	5.24	18	130.6	162.2	64.2	42.9	1.48564e+06	1.81407e+06	2.18315e+06	1.90506e+06	807181	807302	520189	559845
	Positions in Master Proteins	Sequence	Modifications	# Missed Cleavages	PSM Charge (by Search Engine): Sequest HT	PSM m/z [Da] (by Search Engine): Sequest HT	PSM RT [min] (by Search Engine): Sequest HT	# PSMs	Abundances (Grouped): 1	Abundances (Grouped): 2	Abundances (Grouped): 3	Abundances (Grouped): 4	Abundance: F5: Sample, 1	Abundance: F6: Sample, 1	Abundance: F7: Sample, 2	Abundance: F8: Sample, 2	Abundance: F9: Sample, 3	Abundance: F10: Sample, 3	Abundance: F11: Sample, 4	Abundance: F12: Sample, 4
	B1XD64 [100-119]	GERPFVLGPTHEEVITDLIR		0	4	570.311	55.3588	1	128.1	183	53.9	35	96664.8	95698.1	155644	121197	36861.8	44446.8	23581.3	29261.2
	B1XD64 [262-276]	TIAELVEQFNLPIEK		0	2	872.48	68.592	4	143.8	164.1	52.1	40.1	179869	201878	220122	214941	70427.2	67659.5	55020.9	51219.4
	B1XD64 [285-299]	AVEGSSFPQVALLVR		0	2	786.942	58.7312	4	141.8	158.7	61.3	38.2	216739	231287	253841	247217	85688.2	109247	59352.7	61351.4
	B1XD64 [3-12]	TSQYLLSTLK		0	2	577.329	46.7001	1	131	168.1	62.1	38.8	212399	226895	291280	272638	105168	103177	63997.7	65974.8
	B1XD64 [389-402]	NVVAGDPSPDGQGR		0	2	684.829	27.356	2	96.9	198.7	64.8	39.5	80622.9	163779	260689	212860	76875.8	76796.1	41073.4	53367.3
	B1XD64 [408-420]	GIEVGHIFQLGTK		0	3	466.929	51.3701	1	122.6	166.3	64.5	46.6	148018	174508	251594	188877	76262.8	93914.5	58650.7	63732.7
	B1XD64 [451-463]	VVAAAIEQNYDER		0	2	739.367	38.5747	3	135.4	140.9	72.6	51	333052	480538	450461	384610	236379	194400	133940	169717
	B1XD64 [559-568]	TGDIVEYLVK		0	2	568.815	53.503	2	130.3	159.8	67.6	42.3	218270	239486	299519	262716	119519	117661	84572.1	65221.6
FALSE	P0AG63	Small ribosomal subunit protein uS17 [OS=Escherichia coli K-12]	39	3	3	9.7	9.6	18	8.6	275.1	90.5	25.7	226691	259579	8.95892e+06	6.64993e+06	2.53493e+06	2.54475e+06	684791	758354
	Positions in Master Proteins	Sequence	Modifications	# Missed Cleavages	PSM Charge (by Search Engine): Sequest HT	PSM m/z [Da] (by Search Engine): Sequest HT	PSM RT [min] (by Search Engine): Sequest HT	# PSMs	Abundances (Grouped): 1	Abundances (Grouped): 2	Abundances (Grouped): 3	Abundances (Grouped): 4	Abundance: F5: Sample, 1	Abundance: F6: Sample, 1	Abundance: F7: Sample, 2	Abundance: F8: Sample, 2	Abundance: F9: Sample, 3	Abundance: F10: Sample, 3	Abundance: F11: Sample, 4	Abundance: F12: Sample, 4
	P0AG63 [20-27]	SIVVAIER		0	2	443.772	39.8603	4	14.2	275.4	85	25.4	164784	184149	4.06102e+06	2814134	1.04388e+06	1.04301e+06	294914	329007
	P0AG63 [31-36]	HPIYGK		0	2	357.7	20.758	5	5.8	271.4	94.5	28.3	20570	56065.2	1.92345e+06	1.31343e+06	559307	547416	158109	173273
	P0AG63 [44-62]	LHVHDENNECGIGDVVEIR	1xCarbamidomethyl [C10]	0	3	735.685	42.1415	9	2.9	277.1	95.4	24.6	41336.3	19365.2	2974445	2.52236e+06	931746	954324	231768	256073
FALSE	P0A9K9	FKBP-type peptidyl-prolyl cis-trans isomerase SlyD [OS=Escherichia coli K-12]	23	3	3	20.8	5.05	18	255.1	84.8	42.2	17.9	2.75818e+06	3.99206e+06	1.19433e+06	1.01814e+06	500700	600404	255569	212064
	Positions in Master Proteins	Sequence	Modifications	# Missed Cleavages	PSM Charge (by Search Engine): Sequest HT	PSM m/z [Da] (by Search Engine): Sequest HT	PSM RT [min] (by Search Engine): Sequest HT	# PSMs	Abundances (Grouped): 1	Abundances (Grouped): 2	Abundances (Grouped): 3	Abundances (Grouped): 4	Abundance: F5: Sample, 1	Abundance: F6: Sample, 1	Abundance: F7: Sample, 2	Abundance: F8: Sample, 2	Abundance: F9: Sample, 3	Abundance: F10: Sample, 3	Abundance: F11: Sample, 4	Abundance: F12: Sample, 4
	P0A9K9 [58-78]	FDVAVGANDAYGQYDENLVQR		0	2	1172.54	52.3041	3	115.6	153.6	30.8		124984	195800	219331	196909	34412.7	50616
	P0A9K9 [6-16]	DLVVSLAYQVR		0	2	631.86	54.9491	7	255.8	81.9	42.1	20.3	1.40557e+06	1.62783e+06	544512	430199	236633	261278	128002	112180
	P0A9K9 [82-95]	DVFMGVDELQVGMR		0	2	798.382	60.0663	2	305.8	37.6	37.1	19.5	226251	290618	34390.9	28861.7	23296.4	41552.7	17327.5	15415.2
	P0A9K9 [82-95]	DVFMGVDELQVGMR	1xOxidation [M4]	0	2	806.378	56.7951	2	251.1	75.5	48.1	25.3	270680	267045	92923.6	70388.2	48961.8	54106.1	34826.7	21150.7
	P0A9K9 [82-95]	DVFMGVDELQVGMR	2xOxidation [M4; M13]	0	2	814.376	52.0748	4	266.9	73.2	42.9	17	730696	1.61077e+06	303168	291782	157396	192851	75412.7	63317.6
FALSE	B1XAY4	Exodeoxyribonuclease 7 large subunit [OS=Escherichia coli str. K-12 substr. DH10B]	23	8	8	51.8	9.98	18	62.9	113.9	219.9	3.3	588174	445928	1.10895e+06	775073	1.71208e+06	1.87233e+06	26855.4
	Positions in Master Proteins	Sequence	Modifications	# Missed Cleavages	PSM Charge (by Search Engine): Sequest HT	PSM m/z [Da] (by Search Engine): Sequest HT	PSM RT [min] (by Search Engine): Sequest HT	# PSMs	Abundances (Grouped): 1	Abundances (Grouped): 2	Abundances (Grouped): 3	Abundances (Grouped): 4	Abundance: F5: Sample, 1	Abundance: F6: Sample, 1	Abundance: F7: Sample, 2	Abundance: F8: Sample, 2	Abundance: F9: Sample, 3	Abundance: F10: Sample, 3	Abundance: F11: Sample, 4	Abundance: F12: Sample, 4
	B1XAY4 [188-195]	AIELANQR		0	2	457.755	29.9977	2	48.7	97.9	153.3		59659.2	68326.7	140396	117267	197876	203876
	B1XAY4 [196-205]	NECDVLIVGR	1xCarbamidomethyl [C3]	0	2	587.798	41.941	2	58.7	89.7	151.6		82975.4		169872	94568.2	203065	225804
	B1XAY4 [230-252]	IPVVSAVGHETDVTIADFVADLR		0	3	808.764	73.0758	1			164.6	35.4					110395	141273	26855.4
	B1XAY4 [253-265]	APTPSAAAEVVSR		0	2	628.335	35.374	5	62.3	91.2	146.6		122501	136701	221136	162415	284260	326441
	B1XAY4 [364-370]	IQQLEYR		0	2	475.258	33.3901	2	56.9	86.8	156.4		90083.9		170654	110721	241782	253797
	B1XAY4 [386-404]	FGNAVTHLEAVSPLSTLAR		0	3	661.693	55.3696	3	57.2	72.9	169.8		123272	111425	165171	135103	327919	368778
	B1XAY4 [405-418]	GYSVTTATDGNVLK		0	2	713.365	40.5303	1	49	82	169		47867.2	54751.2	101991	72060.4	176408	176845
	B1XAY4 [84-92]	ANITLYEPR		0	2	538.791	41.1779	2	58.5	92.7	148.8		61814.6	74724.9	139733	82938.6	170380	175518
FALSE	P0A7U3	Small ribosomal subunit protein uS19 [OS=Escherichia coli K-12]	49	4	4	10.4	10.52	17	10.7	243	127.8	18.4	189664	150861	4.1784e+06	3.50703e+06	1.94306e+06	2.08528e+06	267215	314766
	Positions in Master Proteins	Sequence	Modifications	# Missed Cleavages	PSM Charge (by Search Engine): Sequest HT	PSM m/z [Da] (by Search Engine): Sequest HT	PSM RT [min] (by Search Engine): Sequest HT	# PSMs	Abundances (Grouped): 1	Abundances (Grouped): 2	Abundances (Grouped): 3	Abundances (Grouped): 4	Abundance: F5: Sample, 1	Abundance: F6: Sample, 1	Abundance: F7: Sample, 2	Abundance: F8: Sample, 2	Abundance: F9: Sample, 3	Abundance: F10: Sample, 3	Abundance: F11: Sample, 4	Abundance: F12: Sample, 4
	P0A7U3 [22-32]	AVESGDKKPLR		1	2	600.34	19.0292	4	13.7	232.5	129.8	24.1	45641	82996.4	1.04609e+06	1.04187e+06	576452	589321	99978.9	116738
	P0A7U3 [37-55]	RSTIFPNMIGLTIAVHNGR		1	3	699.717	56.188	2		169.3	100.1	30.6			151293	119658	79138.2	79918	24357
	P0A7U3 [37-55]	RSTIFPNMIGLTIAVHNGR	1xOxidation [M8]	1	3	705.05	49.5944	2	19.5	271.7	83	25.9	13911.9		211904	178074	56474.6	62382.2	22606.5	15144.9
	P0A7U3 [38-55]	STIFPNMIGLTIAVHNGR		0	3	647.685	61.3568	1		157.3	125.9	16.8			293026	198892	179729	207901	21948.3	30405.8
	P0A7U3 [38-55]	STIFPNMIGLTIAVHNGR	1xOxidation [M7]	0	3	653.016	53.9621	2	43.7	239.4	94.2	22.8	83810.2		497888	423895	165820	196982	44611.1	42961.8
	P0A7U3 [56-70]	QHVPVFVTDEMVGHK		0	3	574.96	42.4788	2	21.9	233.6	123.8	20.7	46300.6	67864.7	685198	523617	297998	338103	53713.1	52593.3
	P0A7U3 [56-70]	QHVPVFVTDEMVGHK	1xOxidation [M11]	0	3	580.292	37.0545	4		191	99.6	9.5			1293000	1021026	587448	610676		56922.6
FALSE	P0A9A9	Ferric uptake regulation protein [OS=Escherichia coli K-12]	41	4	4	16.8	6.11	16	350.8	32.8	11.7	4.7	8.45157e+06	1.03017e+07	1.01718e+06	748360	285057	341317	135261	113775
	Positions in Master Proteins	Sequence	Modifications	# Missed Cleavages	PSM Charge (by Search Engine): Sequest HT	PSM m/z [Da] (by Search Engine): Sequest HT	PSM RT [min] (by Search Engine): Sequest HT	# PSMs	Abundances (Grouped): 1	Abundances (Grouped): 2	Abundances (Grouped): 3	Abundances (Grouped): 4	Abundance: F5: Sample, 1	Abundance: F6: Sample, 1	Abundance: F7: Sample, 2	Abundance: F8: Sample, 2	Abundance: F9: Sample, 3	Abundance: F10: Sample, 3	Abundance: F11: Sample, 4	Abundance: F12: Sample, 4
	P0A9A9 [22-41]	ILEVLQEPDNHHVSAEDLYK		0	3	783.729	47.382	3	349	31.8	13.3	5.9	2.60316e+06	3211385	293849	236109	96891.6	125200	36781.2	65570.3
	P0A9A9 [43-57]	LIDMGEEIGLATVYR	1xOxidation [M4]	0	2	848.436	52.3852	2	262.3	25.3	12.3		608586	780773	81339.6	54515.3	29933.9	34931.6
	P0A9A9 [58-70]	VLNQFDDAGIVTR		0	2	724.379	46.0014	7	353.2	32.9	8.8	5.1	2.92713e+06	3558098	380499	237186	73391.2	88129.6	46347.8
	P0A9A9 [99-110]	VIEFSDDSIEAR		0	2	690.833	45.6063	4	347.7	33.1	12.2	6.9	2.31269e+06	2751465	261495	220549	84840.7	93055.7	52132.5	48205
FALSE	P0ADY7	Large ribosomal subunit protein uL16 [OS=Escherichia coli K-12]	45	5	5	15.3	11.22	16	6.2	229.9	124.3	39.6	116852	93835.4	4.35959e+06	3.43843e+06	2.03868e+06	2.14891e+06	663196	669152
	Positions in Master Proteins	Sequence	Modifications	# Missed Cleavages	PSM Charge (by Search Engine): Sequest HT	PSM m/z [Da] (by Search Engine): Sequest HT	PSM RT [min] (by Search Engine): Sequest HT	# PSMs	Abundances (Grouped): 1	Abundances (Grouped): 2	Abundances (Grouped): 3	Abundances (Grouped): 4	Abundance: F5: Sample, 1	Abundance: F6: Sample, 1	Abundance: F7: Sample, 2	Abundance: F8: Sample, 2	Abundance: F9: Sample, 3	Abundance: F10: Sample, 3	Abundance: F11: Sample, 4	Abundance: F12: Sample, 4
	P0ADY7 [101-114]	VLYEMDGVPEELAR		0	2	810.899	52.3119	2		132.1	67.9				354143	274057	156147	164312
	P0ADY7 [101-114]	VLYEMDGVPEELAR	1xOxidation [M5]	0	2	818.898	46.0527	4		128.6	71.4				1.11064e+06	864603	548667	540504
	P0ADY7 [19-34]	GLAQGTDVSFGSFGLK		0	2	792.407	56.0549	5	11.1	216.9	118.4	53.5	116852	93835.4	2.27575e+06	1823467	1.0828e+06	1.14178e+06	495664	510245
	P0ADY7 [67-81]	VFPDKPITEKPLAVR		0	3	570.67	38.8194	1		178.8	94.8	26.4			137956	108086	64553.5	64994.6	16952.4	19175.8
	P0ADY7 [85-100]	GKGNVEYWVALIQPGK		1	3	586.99	58.2844	2		119.6	99.7	80.7			200833	140205	121371	161300	114084	112484
	P0ADY7 [87-100]	GNVEYWVALIQPGK		0	2	787.424	63.6481	2		213.8	59.5	26.7			280270	228007	65141.5	76025.8	36495.5	27247.2
FALSE	C4ZSS4	Large ribosomal subunit protein bL27 [OS=Escherichia coli BW2952]	29	2	2	9.1	10.58	16	34.5	218.6	112.5	34.3	676946	456131	3.75596e+06	3.30285e+06	1.75486e+06	1.87308e+06	614295	497254
	Positions in Master Proteins	Sequence	Modifications	# Missed Cleavages	PSM Charge (by Search Engine): Sequest HT	PSM m/z [Da] (by Search Engine): Sequest HT	PSM RT [min] (by Search Engine): Sequest HT	# PSMs	Abundances (Grouped): 1	Abundances (Grouped): 2	Abundances (Grouped): 3	Abundances (Grouped): 4	Abundance: F5: Sample, 1	Abundance: F6: Sample, 1	Abundance: F7: Sample, 2	Abundance: F8: Sample, 2	Abundance: F9: Sample, 3	Abundance: F10: Sample, 3	Abundance: F11: Sample, 4	Abundance: F12: Sample, 4
	C4ZSS4 [26-39]	FGGESVLAGSIIVR		0	2	702.895	54.1346	8	42.7	208.2	111.4	37.7	637017	386062	2.59057e+06	2258064	1.2202e+06	1.37357e+06	505049	380131
	C4ZSS4 [45-55]	FHAGANVGCGR	1xCarbamidomethyl [C9]	0	3	382.514	24.9446	8	11.8	247.1	115.7	25.3	39928.6	70069.3	1165387	1.04478e+06	534657	499507	109245	117123
FALSE	P0C018	Large ribosomal subunit protein uL18 [OS=Escherichia coli K-12]	49	5	5	12.8	10.42	16	30.8	216	122.5	30.7	540047	1.0961e+06	6.103e+06	4.76319e+06	3.13502e+06	2.97998e+06	734782	797970
	Positions in Master Proteins	Sequence	Modifications	# Missed Cleavages	PSM Charge (by Search Engine): Sequest HT	PSM m/z [Da] (by Search Engine): Sequest HT	PSM RT [min] (by Search Engine): Sequest HT	# PSMs	Abundances (Grouped): 1	Abundances (Grouped): 2	Abundances (Grouped): 3	Abundances (Grouped): 4	Abundance: F5: Sample, 1	Abundance: F6: Sample, 1	Abundance: F7: Sample, 2	Abundance: F8: Sample, 2	Abundance: F9: Sample, 3	Abundance: F10: Sample, 3	Abundance: F11: Sample, 4	Abundance: F12: Sample, 4
	P0C018 [103-111]	VQALADAAR		0	2	457.756	28.1285	3	26	234.1	115.5	24.4	173108	471946	2.81687e+06	2.34764e+06	1.38344e+06	1.16242e+06	245398	292238
	P0C018 [34-56]	HIYAQVIAPNGSEVLVAASTVEK		0	3	799.43	52.8564	4	26.3	210.6	140.7	22.5	116502	123896	1.1144e+06	830886	623176	662818	105346	99916.2
	P0C018 [69-76]	DAAAAVGK		0	2	351.692	21.3198	4	5.8	229	130.8	34.4		22034.7	1.006e+06	762574	473877	528435	127163	136150
	P0C018 [77-85]	AVAERALEK		1	2	493.785	23.1334	2	115.8	109.8	85.9	88.4	109812	287849	199773	142155	140284	123980	134270	137102
	P0C018 [95-102]	SGFQYHGR		0	2	476.224	26.0279	3	40.7	201.4	126.3	31.7	140624	190375	965964	679934	514248	502327	122606	132563
FALSE	C4ZPU9	Small ribosomal subunit protein bS20 [OS=Escherichia coli BW2952]	34	3	3	9.7	11.18	16	43.9	203.7	97.6	54.8	855074	1.13621e+06	5.23574e+06	3.98635e+06	2.15028e+06	2.22713e+06	1.12834e+06	1.341e+06
	Positions in Master Proteins	Sequence	Modifications	# Missed Cleavages	PSM Charge (by Search Engine): Sequest HT	PSM m/z [Da] (by Search Engine): Sequest HT	PSM RT [min] (by Search Engine): Sequest HT	# PSMs	Abundances (Grouped): 1	Abundances (Grouped): 2	Abundances (Grouped): 3	Abundances (Grouped): 4	Abundance: F5: Sample, 1	Abundance: F6: Sample, 1	Abundance: F7: Sample, 2	Abundance: F8: Sample, 2	Abundance: F9: Sample, 3	Abundance: F10: Sample, 3	Abundance: F11: Sample, 4	Abundance: F12: Sample, 4
	C4ZPU9 [35-44]	VYAAIEAGDK		0	2	518.769	31.9782	3	56	198.9	85.7	59.4	291570	397415	1.33764e+06	1.09223e+06	531310	510623	322736	404045
	C4ZPU9 [50-60]	AFNEMQPIVDR		0	2	660.326	44.1925	3		170.7	92.6	36.7			479625	398130	226308	248225	83428.4	105630
	C4ZPU9 [50-60]	AFNEMQPIVDR	1xOxidation [M5]	0	2	668.321	36.5136	6	43.5	188.7	108.2	59.6	245580	288642	1.43582e+06	929020	650887	674622	331890	401211
	C4ZPU9 [77-85]	ANLTAQINK		0	2	486.776	30.2859	4	45.6	212.5	92.5	49.4	317925	450150	1.98266e+06	1.56697e+06	741775	793664	390280	430113
FALSE	C4ZYI0	Translation initiation factor IF-3 [OS=Escherichia coli BW2952]	16	2	2	20.6	9.52	15	106.5	133.7	93.4	66.3	776811	892792	1.18471e+06	922410	693102	769315	504841	532292
	Positions in Master Proteins	Sequence	Modifications	# Missed Cleavages	PSM Charge (by Search Engine): Sequest HT	PSM m/z [Da] (by Search Engine): Sequest HT	PSM RT [min] (by Search Engine): Sequest HT	# PSMs	Abundances (Grouped): 1	Abundances (Grouped): 2	Abundances (Grouped): 3	Abundances (Grouped): 4	Abundance: F5: Sample, 1	Abundance: F6: Sample, 1	Abundance: F7: Sample, 2	Abundance: F8: Sample, 2	Abundance: F9: Sample, 3	Abundance: F10: Sample, 3	Abundance: F11: Sample, 4	Abundance: F12: Sample, 4
	C4ZYI0 [26-40]	LTGLEGEQLGIVSLR		0	2	792.952	56.3099	8	114.4	127.9	93.1	64.5	493242	522634	631671	510153	389399	438668	287854	284965
	C4ZYI0 [98-110]	FRPGTDEGDYQVK		0	3	504.576	32.6789	7	96	141.5	93.9	68.6	283569	370158	553036	412257	303704	330647	216987	247327
FALSE	C4ZYM7	Small ribosomal subunit protein bS16 [OS=Escherichia coli BW2952]	52	4	4	9.2	10.55	14	33.8	240.5	89.5	36.1	517446	572736	4.26006e+06	3.51409e+06	1.38331e+06	1.49732e+06	567203	595390
	Positions in Master Proteins	Sequence	Modifications	# Missed Cleavages	PSM Charge (by Search Engine): Sequest HT	PSM m/z [Da] (by Search Engine): Sequest HT	PSM RT [min] (by Search Engine): Sequest HT	# PSMs	Abundances (Grouped): 1	Abundances (Grouped): 2	Abundances (Grouped): 3	Abundances (Grouped): 4	Abundance: F5: Sample, 1	Abundance: F6: Sample, 1	Abundance: F7: Sample, 2	Abundance: F8: Sample, 2	Abundance: F9: Sample, 3	Abundance: F10: Sample, 3	Abundance: F11: Sample, 4	Abundance: F12: Sample, 4
	C4ZYM7 [13-25]	KRPFYQVVVADSR		1	3	522.292	39.5139	4	32	227.1	90.2	50.7	135108	158875	1.16133e+06	927873	409926	414565	225134	238647
	C4ZYM7 [36-46]	VGFFNPIASEK		0	2	604.82	51.6508	5	38.1	233.9	88.9	39.1	101815	107487	695030	594448	230777	258442	100965	114371
	C4ZYM7 [36-51]	VGFFNPIASEKEEGTR		1	3	594.301	47.1186	4	37.8	236.4	94.8	31.1	153015	171067	1.06911e+06	956309	396144	414835	136072	129783
	C4ZYM7 [57-70]	IAHWVGQGATISDR		0	3	504.263	37.5382	1	29.3	262.4	84.1	24.3	127507	135308	1.33459e+06	1.03546e+06	346460	409475	105032	112589
FALSE	C4ZQG0	Arginine--tRNA ligase [OS=Escherichia coli BW2952]	14	7	7	64.6	5.49	14	210	85	59.9	45.1	2.51023e+06	2.76476e+06	1.14744e+06	990652	658949	858338	583484	548299
	Positions in Master Proteins	Sequence	Modifications	# Missed Cleavages	PSM Charge (by Search Engine): Sequest HT	PSM m/z [Da] (by Search Engine): Sequest HT	PSM RT [min] (by Search Engine): Sequest HT	# PSMs	Abundances (Grouped): 1	Abundances (Grouped): 2	Abundances (Grouped): 3	Abundances (Grouped): 4	Abundance: F5: Sample, 1	Abundance: F6: Sample, 1	Abundance: F7: Sample, 2	Abundance: F8: Sample, 2	Abundance: F9: Sample, 3	Abundance: F10: Sample, 3	Abundance: F11: Sample, 4	Abundance: F12: Sample, 4
	C4ZQG0 [135-144]	STIIGDAAVR		0	2	501.781	36.5278	2	208.4	106.9	53.7	31	390290	470822	218992	220792	98590.8	123722	65641.5	61796.8
	C4ZQG0 [145-152]	TLEFLGHK		0	2	472.764	38.8949	1	204.8		56.6	38.5	250734	271618				72133.6	51328.4	46939.9
	C4ZQG0 [217-225]	LQSGDEYFR		0	2	557.763	37.4929	2	206.2	98.2	53.6	41.9	293250	314969	165536	126603	76487.9	81611.5	54239.5	70341.5
	C4ZQG0 [390-400]	LADLLDEALER		0	2	629.338	57.8324	6	192.7	85.8	66.6	54.9	503235	490793	238546	205115	159283	185484	156814	127798
	C4ZQG0 [420-430]	LANAVGIGAVK		0	2	506.809	37.2381	1	201.1	82.3	69.5	47	472634	555220	225935	194582	155770	201402	124823	114920
	C4ZQG0 [473-489]	KAEIDEEQLAAAPVIIR		1	3	622.684	47.9394	1	203.2	101.4	56.4	38.9	181736	196013	99369.6	89217.3	55132.1	49841.5	33133.2	39413.5
	C4ZQG0 [564-576]	LGLDTLGIETVER		0	2	708.39	55.7565	1	210.9	83.8	61.2	44.1	418351	465324	199061	154344	113685	144143	97505.2	87090.2
FALSE	P07395	Phenylalanine--tRNA ligase beta subunit [OS=Escherichia coli K-12]	11	7	7	87.3	5.3	14	194.1	110.7	64	31.1	1.6332e+06	1.72349e+06	1.06982e+06	855569	534024	573672	287515	251669
	Positions in Master Proteins	Sequence	Modifications	# Missed Cleavages	PSM Charge (by Search Engine): Sequest HT	PSM m/z [Da] (by Search Engine): Sequest HT	PSM RT [min] (by Search Engine): Sequest HT	# PSMs	Abundances (Grouped): 1	Abundances (Grouped): 2	Abundances (Grouped): 3	Abundances (Grouped): 4	Abundance: F5: Sample, 1	Abundance: F6: Sample, 1	Abundance: F7: Sample, 2	Abundance: F8: Sample, 2	Abundance: F9: Sample, 3	Abundance: F10: Sample, 3	Abundance: F11: Sample, 4	Abundance: F12: Sample, 4
	P07395 [167-177]	ADCLGIIGVAR	1xCarbamidomethyl [C3]	0	2	572.81	47.7309	2	217.8	102.6	56.4	23.2	200004	226453	113695	88513.1	52976.1	57419.9	22129	23136.8
	P07395 [576-587]	FVPDTQAPLGIR		0	2	657.365	46.2544	2	191.8	114.9	61.9	31.4	207488	225888	154694	108806	69356.6	70381.8	34076.6	36770.3
	P07395 [619-630]	GDLESVLDLTGK		0	2	623.831	56.3647	1	164.5	139.1	66	30.4	161619	179955	159259	130472	70637.2	66344.5	27551	35971.9
	P07395 [659-671]	IGFVGVVHPELER		0	3	484.604	47.5179	2	214.7	100.4	54.3	30.5	323305	326704	160860	143496	85011.3	79495.1	46250.5	46187.5
	P07395 [755-767]	SLAISLILQDTSR		0	2	708.907	61.7553	2	185.1	105	80.3	29.6	198713	227198	139009	104550	83227.5	102164	66698.5	17360.2
	P07395 [768-780]	TLEEEEIAATVAK		0	2	702.364	46.3682	3	192.5	110.8	64.3	32.4	304549	297987	190225	157985	95964.4	105616	51406.8	50000.3
	P07395 [90-104]	VAVATIGAVLPGDFK		0	2	729.422	56.5017	2	190.9	109	67.4	32.7	237521	239304	152077	121747	76851.2	92250.6	39402.5	42242.1
FALSE	P0A8N3	Lysine--tRNA ligase [OS=Escherichia coli K-12]	12	5	5	57.6	5.24	14	183.7	114.8	77.5	23.9	1.54373e+06	1.80435e+06	1.13688e+06	956651	671243	738300	226892	208324
	Positions in Master Proteins	Sequence	Modifications	# Missed Cleavages	PSM Charge (by Search Engine): Sequest HT	PSM m/z [Da] (by Search Engine): Sequest HT	PSM RT [min] (by Search Engine): Sequest HT	# PSMs	Abundances (Grouped): 1	Abundances (Grouped): 2	Abundances (Grouped): 3	Abundances (Grouped): 4	Abundance: F5: Sample, 1	Abundance: F6: Sample, 1	Abundance: F7: Sample, 2	Abundance: F8: Sample, 2	Abundance: F9: Sample, 3	Abundance: F10: Sample, 3	Abundance: F11: Sample, 4	Abundance: F12: Sample, 4
	P0A8N3 [133-144]	TGELSIHCTELR	1xCarbamidomethyl [C8]	0	3	472.57	37.3944	3	213.3	91.8	72.2	22.7	315065	350288	153391	133289	106070	119219	37139.3	33513.2
	P0A8N3 [300-308]	TLAQDILGK		0	2	479.783	47.9827	4	172.6	121.5	76.5	29.3	392715	451565	314282	279584	183834	189526	70779.5	72295.7
	P0A8N3 [309-326]	TEVTYGDVTLDFGKPFEK		0	3	682.673	56.8654	2	145.7	94.8	59.4		265427	308901	207903	166902	104945	129909
	P0A8N3 [353-364]	AIAESIGIHVEK		0	2	633.856	39.1335	1	172.2	121	75.3	31.5	205995	236332	170451	141121	91592.4	101696	40450.7	40243.6
	P0A8N3 [83-94]	ASFVTLQDVGGR		0	2	625.331	46.8266	4	175.4	112.5	82.1	30	364523	457262	290853	235755	184802	197950	78522.1	62271.8
FALSE	P0A8M3	Threonine--tRNA ligase [OS=Escherichia coli K-12]	7	5	5	74	6.19	13	202.2	95.3	72.5	30	1.42572e+06	1.58956e+06	820058	613211	532107	547024	213288	234435
	Positions in Master Proteins	Sequence	Modifications	# Missed Cleavages	PSM Charge (by Search Engine): Sequest HT	PSM m/z [Da] (by Search Engine): Sequest HT	PSM RT [min] (by Search Engine): Sequest HT	# PSMs	Abundances (Grouped): 1	Abundances (Grouped): 2	Abundances (Grouped): 3	Abundances (Grouped): 4	Abundance: F5: Sample, 1	Abundance: F6: Sample, 1	Abundance: F7: Sample, 2	Abundance: F8: Sample, 2	Abundance: F9: Sample, 3	Abundance: F10: Sample, 3	Abundance: F11: Sample, 4	Abundance: F12: Sample, 4
	P0A8M3 [111-122]	TLTQEDVEALEK		0	2	688.351	43.5115	3	155.1	88.1	56.8		236934	295400	167952	134549	91630.9	102262
	P0A8M3 [111-123]	TLTQEDVEALEKR		1	3	511.27	41.6806	2	185.4	104.4	74.5	35.7	306376	299047	212382	136863	125117	118260	51557.6	66085.6
	P0A8M3 [228-235]	ALNAYLQR		0	2	474.767	38.7392	3	198.9	91.3	71	38.9	340656	376569	184388	146571	135555	120518	64938.8	75611.5
	P0A8M3 [466-476]	IEFTLYDCLDR	1xCarbamidomethyl [C8]	0	2	722.843	57.4694	2	240	56.8	71.2	32	234515	260468	66216.8	51653.3	65329	82291.5	35596.5	30525.3
	P0A8M3 [493-504]	LSASYVGEDNER		0	2	670.311	32.4933	3	195.9	97.3	70.3	36.4	307236	358075	189118	143575	114474	123693	61195.2	62212.6
FALSE	B1XGX7	Small ribosomal subunit protein uS15 [OS=Escherichia coli str. K-12 substr. DH10B]	48	3	3	10.3	10.4	13	16.6	234.9	100.7	47.7	420486	426381	6.71605e+06	5335940	2584101	2.54809e+06	1.19921e+06	1.23443e+06
	Positions in Master Proteins	Sequence	Modifications	# Missed Cleavages	PSM Charge (by Search Engine): Sequest HT	PSM m/z [Da] (by Search Engine): Sequest HT	PSM RT [min] (by Search Engine): Sequest HT	# PSMs	Abundances (Grouped): 1	Abundances (Grouped): 2	Abundances (Grouped): 3	Abundances (Grouped): 4	Abundance: F5: Sample, 1	Abundance: F6: Sample, 1	Abundance: F7: Sample, 2	Abundance: F8: Sample, 2	Abundance: F9: Sample, 3	Abundance: F10: Sample, 3	Abundance: F11: Sample, 4	Abundance: F12: Sample, 4
	B1XGX7 [18-47]	DANDTGSTEVQVALLTAQINHLQGHFAEHK		0	4	811.905	60.2116	2	16.6	232	86.3	65	102816	85278	1.5455e+06	1.11156e+06	481775	493606	378542	356569
	B1XGX7 [66-71]	IIDYIK		0	2	382.732	43.4044	8	18.9	240.1	103	37.9	83165	105033	1.28466e+06	1.09551e+06	521246	497150	194869	179784
	B1XGX7 [78-84]	YTQLIER		0	2	461.753	33.4836	7	15.8	234.3	105.4	44.4	234505	236071	3.88588e+06	3.12887e+06	1.58108e+06	1.55733e+06	625800	698077
FALSE	P0AGJ9	Tyrosine--tRNA ligase [OS=Escherichia coli K-12]	19	5	5	47.5	5.81	12	209.9	107.2	49.7	33.2	1.4258e+06	1.59893e+06	823795	722708	359455	355318	213789	267491
	Positions in Master Proteins	Sequence	Modifications	# Missed Cleavages	PSM Charge (by Search Engine): Sequest HT	PSM m/z [Da] (by Search Engine): Sequest HT	PSM RT [min] (by Search Engine): Sequest HT	# PSMs	Abundances (Grouped): 1	Abundances (Grouped): 2	Abundances (Grouped): 3	Abundances (Grouped): 4	Abundance: F5: Sample, 1	Abundance: F6: Sample, 1	Abundance: F7: Sample, 2	Abundance: F8: Sample, 2	Abundance: F9: Sample, 3	Abundance: F10: Sample, 3	Abundance: F11: Sample, 4	Abundance: F12: Sample, 4
	P0AGJ9 [14-28]	GLVAQVTDEEALAER		0	2	800.913	48.7597	4	200.3	109	49.1	41.6	462834	520850	283552	251988	126630	114568	99372.4	104453
	P0AGJ9 [215-230]	LHQNQVFGLTVPLITK		0	3	603.353	57.3275	1	227.7	95.5	47.7	29.1	241537	230686	105205	93266	45333.4	53858.6	27806.8	32728.4
	P0AGJ9 [310-321]	LVHGEEGLQAAK		0	3	417.894	26.8359	3	211	106.3	49.6	33	390787	438558	219484	198325	103066	91928.5	63868.5	65815.2
	P0AGJ9 [391-403]	QSDPEYFFKEEDR		1	3	563.918	44.1392	2	223.8	100.1	50.9	25.2	171400	233958	98579.8	81355.8	41297.5	50337.7	22741.2	22400.9
	P0AGJ9 [61-85]	FQQAGHKPVALVGGATGLIGDPSFK		0	3	832.453	49.0304	2	185.5	118.9	48.8	46.8	159240	174882	116975	97773.5	43127.5	44624.9		42093.9
FALSE	P00961	Glycine--tRNA ligase beta subunit [OS=Escherichia coli K-12]	8	4	4	76.8	5.44	11	160.2	126.6	82.4	30.8	857201	991897	852561	622820	456746	491768	180129	174443
	Positions in Master Proteins	Sequence	Modifications	# Missed Cleavages	PSM Charge (by Search Engine): Sequest HT	PSM m/z [Da] (by Search Engine): Sequest HT	PSM RT [min] (by Search Engine): Sequest HT	# PSMs	Abundances (Grouped): 1	Abundances (Grouped): 2	Abundances (Grouped): 3	Abundances (Grouped): 4	Abundance: F5: Sample, 1	Abundance: F6: Sample, 1	Abundance: F7: Sample, 2	Abundance: F8: Sample, 2	Abundance: F9: Sample, 3	Abundance: F10: Sample, 3	Abundance: F11: Sample, 4	Abundance: F12: Sample, 4
	P00961 [327-338]	LADAEFFFNTDR		0	2	723.339	56.7138	5	155	115.7	91.2	38.1	250323	291124	239912	169225	145879	173030	65807.5	66809.9
	P00961 [349-362]	LQTVLFQQQLGTLR		0	2	822.975	56.257	4	167.2	123.5	79.7	29.6	250075	269420	218012	168558	118562	129208	43694	48346.6
	P00961 [419-437]	HDGEAEDVAVALNEQYQPR		0	3	714.336	46.2487	1	151.1	133.4	82	33.5	145353	191568	176791	122734	91460.1	89727.1	45410.2	30185.1
	P00961 [97-107]	GCGITVDQAER	1xCarbamidomethyl [C2]	0	2	603.282	31.2085	1	166.6	139.1	74.2	20	211451	239785	217846	162303	100845	99802.1	25217.3	29101.4
FALSE	C4ZR79	Small ribosomal subunit protein bS18 [OS=Escherichia coli BW2952]	29	2	2	9	10.59	11	12.5	224.8	105.2	57.6	422273	469544	8.6364e+06	7.46262e+06	3.54239e+06	3983945	2.08045e+06	2.03176e+06
	Positions in Master Proteins	Sequence	Modifications	# Missed Cleavages	PSM Charge (by Search Engine): Sequest HT	PSM m/z [Da] (by Search Engine): Sequest HT	PSM RT [min] (by Search Engine): Sequest HT	# PSMs	Abundances (Grouped): 1	Abundances (Grouped): 2	Abundances (Grouped): 3	Abundances (Grouped): 4	Abundance: F5: Sample, 1	Abundance: F6: Sample, 1	Abundance: F7: Sample, 2	Abundance: F8: Sample, 2	Abundance: F9: Sample, 3	Abundance: F10: Sample, 3	Abundance: F11: Sample, 4	Abundance: F12: Sample, 4
	C4ZR79 [13-24]	FTAEGVQEIDYK		0	2	700.343	42.4722	6	11.1	231.8	104.9	52.3	157956	200770	4.07222e+06	3.40557e+06	1.66576e+06	1.70504e+06	838987	840244
	C4ZR79 [64-73]	YLSLLPYTDR		0	2	620.832	54.551	5	13.6	219.2	105.3	61.9	264317	268773	4564181	4.05705e+06	1.87663e+06	2.27891e+06	1.24147e+06	1191515
FALSE	P07813	Leucine--tRNA ligase [OS=Escherichia coli K-12]	7	5	5	97.2	5.3	11	210.7	131.6	48.2	9.5	1.17842e+06	1.57332e+06	905046	799695	280397	345510	59548.9	63712.1
	Positions in Master Proteins	Sequence	Modifications	# Missed Cleavages	PSM Charge (by Search Engine): Sequest HT	PSM m/z [Da] (by Search Engine): Sequest HT	PSM RT [min] (by Search Engine): Sequest HT	# PSMs	Abundances (Grouped): 1	Abundances (Grouped): 2	Abundances (Grouped): 3	Abundances (Grouped): 4	Abundance: F5: Sample, 1	Abundance: F6: Sample, 1	Abundance: F7: Sample, 2	Abundance: F8: Sample, 2	Abundance: F9: Sample, 3	Abundance: F10: Sample, 3	Abundance: F11: Sample, 4	Abundance: F12: Sample, 4
	P07813 [124-134]	ELATCTPEYYR	1xCarbamidomethyl [C5]	0	2	701.82	38.3287	1	218.1	131.3	38.1	12.5	150605	173143	101142	93396.5	26001.3	30683.2		9282.96
	P07813 [55-64]	NYTIGDVIAR		0	2	561.301	46.4448	4	198.2	141.6	44.5	15.7	357539	356678	291703	223143	84743.1	75952.3	26193.4	30754.9
	P07813 [684-699]	GDVAALNVDALTENQK		0	2	829.423	48.4967	3	185	143.4	55.3	16.3	171566	216354	161020	138521	55112.2	60297.7	16987.4
	P07813 [748-759]	ALMQEALLAVVR		0	2	657.383	63.142	2	181.5	89.6	28.9		186694	213516	100200	96982		31779.9
	P07813 [814-826]	ITVPVDATEEQVR		0	2	728.884	41.4324	1	209.3	119.3	62	9.4	312012	613630	250982	247653	114540	146797	16368.1	23674.3
FALSE	B1X9R9	Glutamate--tRNA ligase [OS=Escherichia coli str. K-12 substr. DH10B]	16	5	5	53.8	5.94	10	269.3	66.8	37	26.9	1.44702e+06	1.73565e+06	420680	367850	214940	220460	172921	144516
	Positions in Master Proteins	Sequence	Modifications	# Missed Cleavages	PSM Charge (by Search Engine): Sequest HT	PSM m/z [Da] (by Search Engine): Sequest HT	PSM RT [min] (by Search Engine): Sequest HT	# PSMs	Abundances (Grouped): 1	Abundances (Grouped): 2	Abundances (Grouped): 3	Abundances (Grouped): 4	Abundance: F5: Sample, 1	Abundance: F6: Sample, 1	Abundance: F7: Sample, 2	Abundance: F8: Sample, 2	Abundance: F9: Sample, 3	Abundance: F10: Sample, 3	Abundance: F11: Sample, 4	Abundance: F12: Sample, 4
	B1X9R9 [142-157]	FANPQEGSVVFDDQIR		0	2	911.443	49.172	2	249.7	78	41	31.4	202072	225373	76350.2	58187	33804.4	36301.6	26805.6
	B1X9R9 [158-173]	GPIEFSNQELDDLIIR		0	2	929.982	64.7627	2	279.3	59.1	33.9	27.7	203428	227397	47345.6	43767.3	26383.8	25899.6	22863.5	19838.6
	B1X9R9 [41-48]	IEDTDLER		0	2	495.741	30.0332	2	250.7	74	43.6	31.6	307748	411416	111049	99349.5	62259.5	61595.4	41719.9	48222.9
	B1X9R9 [430-450]	VAVTGAGQSPALDVTVHAIGK		0	3	664.366	46.2869	2	276.4	63.8	31.7	28.1	421895	507007	110707	103015	47394.4	59546.8	48096	45845.7
	B1X9R9 [7-21]	FAPSPTGYLHVGGAR		0	3	510.602	43.4209	2	281.4	57.7	34.2	26.7	311872	364461	75228.7	63531.3	45098.3	37116.7	33435.8	30608.6
FALSE	P0AG59	Small ribosomal subunit protein uS14 [OS=Escherichia coli K-12]	19	2	2	11.6	11.17	10	14.8	257.9	103.8	23.5	118488	170126	2.66908e+06	2.2863e+06	991573	996654	202424	250987
	Positions in Master Proteins	Sequence	Modifications	# Missed Cleavages	PSM Charge (by Search Engine): Sequest HT	PSM m/z [Da] (by Search Engine): Sequest HT	PSM RT [min] (by Search Engine): Sequest HT	# PSMs	Abundances (Grouped): 1	Abundances (Grouped): 2	Abundances (Grouped): 3	Abundances (Grouped): 4	Abundance: F5: Sample, 1	Abundance: F6: Sample, 1	Abundance: F7: Sample, 2	Abundance: F8: Sample, 2	Abundance: F9: Sample, 3	Abundance: F10: Sample, 3	Abundance: F11: Sample, 4	Abundance: F12: Sample, 4
	P0AG59 [29-41]	AIISDVNASDEDR		0	2	702.833	35.5641	4	13	262.6	101.7	22.7	15460.4	31703.3	498283	401169	172321	174063	40059.4	37137.9
	P0AG59 [48-53]	LQTLPR		0	2	364.226	29.5283	6	15.2	256.9	104.3	23.7	103027	138422	2.1708e+06	1885126	819252	822591	162365	213849
FALSE	B1XG70	Small ribosomal subunit protein bS21 [OS=Escherichia coli str. K-12 substr. DH10B]	28	3	3	8.5	11.15	10	29.7	215.9	113.2	41.2	232803	235889	1.88943e+06	1.5413e+06	887621	901790	327496	324165
	Positions in Master Proteins	Sequence	Modifications	# Missed Cleavages	PSM Charge (by Search Engine): Sequest HT	PSM m/z [Da] (by Search Engine): Sequest HT	PSM RT [min] (by Search Engine): Sequest HT	# PSMs	Abundances (Grouped): 1	Abundances (Grouped): 2	Abundances (Grouped): 3	Abundances (Grouped): 4	Abundance: F5: Sample, 1	Abundance: F6: Sample, 1	Abundance: F7: Sample, 2	Abundance: F8: Sample, 2	Abundance: F9: Sample, 3	Abundance: F10: Sample, 3	Abundance: F11: Sample, 4	Abundance: F12: Sample, 4
	B1XG70 [26-33]	AGVLAEVR		0	2	407.743	34.8897	3	33.5	209.3	114	43.2	112950	120939	849858	625733	392676	401443	154830	146349
	B1XG70 [6-17]	VRENEPFDVALR		1	3	482.257	43.3501	3	23.1	233.6	109.5	33.8	42319.3	37343.1	438516	368382	189162	187474	59553.9	56731.9
	B1XG70 [8-17]	ENEPFDVALR		0	2	595.297	47.757	4	28.8	212.9	114.8	43.4	77533.9	77606.5	601053	547189	305783	312874	113112	121084
FALSE	P76422	Hydroxymethylpyrimidine/phosphomethylpyrimidine kinase [OS=Escherichia coli K-12]	38	5	5	28.6	6.15	9	88.1	219.2	80.6	12.1	319897	383737	958029	792509	294293	348659	67124.5	34682.2
	Positions in Master Proteins	Sequence	Modifications	# Missed Cleavages	PSM Charge (by Search Engine): Sequest HT	PSM m/z [Da] (by Search Engine): Sequest HT	PSM RT [min] (by Search Engine): Sequest HT	# PSMs	Abundances (Grouped): 1	Abundances (Grouped): 2	Abundances (Grouped): 3	Abundances (Grouped): 4	Abundance: F5: Sample, 1	Abundance: F6: Sample, 1	Abundance: F7: Sample, 2	Abundance: F8: Sample, 2	Abundance: F9: Sample, 3	Abundance: F10: Sample, 3	Abundance: F11: Sample, 4	Abundance: F12: Sample, 4
	P76422 [112-126]	SGDPLLSPSAVATLR		0	2	742.409	52.4586	2	65.5	158.7	75.8		83293.8	99295.2	238645	203400	89448.2	123709
	P76422 [129-153]	LLPQVSLITPNLPEAAALLDAPHAR		0	3	874.167	67.9402	2	98.5	214.3	57.8	29.3	66522.9	75463	163047	145658	36026.9	47918.5	25705.2	17324.1
	P76422 [26-47]	TFSALGAYGCSVITALVAQNTR	1xCarbamidomethyl [C10]	0	3	767.396	73.0212	1	105.2	184.7	74.6	35.6	58038.3	67487.8	129950	92872.1	40521.9	48546.5	25787.8	17358.2
	P76422 [3-25]	RINALTIAGTDPSGGAGIQADLK		1	3	747.073	48.7798	2	54.8	190.3	54.9		41507.2	46988.7	163303	144208	51840.8	37754.4
	P76422 [78-93]	IGMLAETDIVEAVAER	1xOxidation [M3]	0	2	866.943	56.6441	2	79	225.4	80.6	15.1	70534.5	94501.9	263084	206372	76455.6	90731.1	15631.6
FALSE	B1X8W8	Bifunctional polymyxin resistance protein ArnA [OS=Escherichia coli str. K-12 substr. DH10B]	15	7	7	74.2	6.87	9	118.7	208.7	58.2	14.5	609430	680086	1.24067e+06	1.03322e+06	333901	298318	82533.3	74729.7
	Positions in Master Proteins	Sequence	Modifications	# Missed Cleavages	PSM Charge (by Search Engine): Sequest HT	PSM m/z [Da] (by Search Engine): Sequest HT	PSM RT [min] (by Search Engine): Sequest HT	# PSMs	Abundances (Grouped): 1	Abundances (Grouped): 2	Abundances (Grouped): 3	Abundances (Grouped): 4	Abundance: F5: Sample, 1	Abundance: F6: Sample, 1	Abundance: F7: Sample, 2	Abundance: F8: Sample, 2	Abundance: F9: Sample, 3	Abundance: F10: Sample, 3	Abundance: F11: Sample, 4	Abundance: F12: Sample, 4
	B1X8W8 [115-134]	APLNWVLVNGETETGVTLHR		0	3	736.058	56.7889	1	89.8	146.3	63.9		72477.7	67875.1	127801	102327	49948.7
	B1X8W8 [150-164]	IAIAPDDIAITLHHK		0	3	543.311	47.2057	2	105.7	220.4	56.8	17.1	85465.3	89120.2	197877	167158	50595	43390.3	15266	13073.9
	B1X8W8 [182-191]	HGNILEIAQR		0	2	575.822	38.1535	1	122	189.7	69.9	18.4	98096.3	110086	168061	155309	57253.5	61836.4	15653.8
	B1X8W8 [318-334]	VLILGVNGFIGNHLTER		0	3	618.02	57.8708	1	120.5	197	57.5	25.1	76809.4	92404.8	152401	124501	33964	47527.3		17532.3
	B1X8W8 [405-415]	VFELDFEENLR		0	2	705.849	58.8042	1	131.9	189.5	59.1	19.5	124222	117182	189577	158624	49064.9	59583.1	19359.4	16450.8
	B1X8W8 [511-526]	AITQLILNLVEGSPIK		0	2	855.014	77.4474	1	121.8	208.3	52.6	17.3	89206.6	92839.9	164705	147127	40445.2	38252.8	16053.8	10363.2
	B1X8W8 [602-611]	VVESSSYYGK		0	2	559.772	28.5925	2	93.5	231.6	56.1	18.7	63153.3	110578	240248	178176	52630.2	47728.1	16200.4	17309.6
FALSE	P0AAT6	Ribosomal silencing factor RsfS [OS=Escherichia coli K-12]	25	2	2	11.6	4.7	8	16.8	196.8	153.6	32.8	33142.2	44142.1	481229	419644	345525	355897	74807.4	75181.8
	Positions in Master Proteins	Sequence	Modifications	# Missed Cleavages	PSM Charge (by Search Engine): Sequest HT	PSM m/z [Da] (by Search Engine): Sequest HT	PSM RT [min] (by Search Engine): Sequest HT	# PSMs	Abundances (Grouped): 1	Abundances (Grouped): 2	Abundances (Grouped): 3	Abundances (Grouped): 4	Abundance: F5: Sample, 1	Abundance: F6: Sample, 1	Abundance: F7: Sample, 2	Abundance: F8: Sample, 2	Abundance: F9: Sample, 3	Abundance: F10: Sample, 3	Abundance: F11: Sample, 4	Abundance: F12: Sample, 4
	P0AAT6 [19-30]	GQDIIALDVQGK		0	2	628.846	45.7892	4		155.6	120	24.4			286533	229850	191096	204719	42153.9	38405.8
	P0AAT6 [47-60]	HVMSIADHVVQESR	1xOxidation [M3]	0	3	541.935	31.7545	4	36.6	184	146.2	33.2	33142.2	44142.1	194696	189795	154429	151177	32653.5	36776
FALSE	P08312	Phenylalanine--tRNA ligase alpha subunit [OS=Escherichia coli K-12]	12	3	3	36.8	6.2	7	179.5	126	63.3	31.1	615682	716963	544065	399908	232646	236088	112656	117495
	Positions in Master Proteins	Sequence	Modifications	# Missed Cleavages	PSM Charge (by Search Engine): Sequest HT	PSM m/z [Da] (by Search Engine): Sequest HT	PSM RT [min] (by Search Engine): Sequest HT	# PSMs	Abundances (Grouped): 1	Abundances (Grouped): 2	Abundances (Grouped): 3	Abundances (Grouped): 4	Abundance: F5: Sample, 1	Abundance: F6: Sample, 1	Abundance: F7: Sample, 2	Abundance: F8: Sample, 2	Abundance: F9: Sample, 3	Abundance: F10: Sample, 3	Abundance: F11: Sample, 4	Abundance: F12: Sample, 4
	P08312 [13-28]	AAISQASDVAALDNVR		0	2	800.918	45.0161	2	180.1	119.1	67.7	33.1	198595	224567	158418	123163	77381.4	81487.1	37221.6	40527.7
	P08312 [65-74]	EQVQQALNAR		0	2	578.807	31.408	2	181.7	126.5	63.4	28.4	226366	282729	212686	145992	94431.9	82478.3	37076.2	42335.4
	P08312 [87-99]	LAAETIDVSLPGR		0	2	671.372	48.0348	3	176.6	132.8	58.5	32.2	190721	209666	172961	130752	60832.5	72123	38358.3	34631.5
FALSE	C4ZX93	Nucleoside diphosphate kinase [OS=Escherichia coli BW2952]	38	3	3	15.5	5.81	7	162.2	109.4	67.9	60.5	638848	737651	520877	411615	262094	315506	258627	253357
	Positions in Master Proteins	Sequence	Modifications	# Missed Cleavages	PSM Charge (by Search Engine): Sequest HT	PSM m/z [Da] (by Search Engine): Sequest HT	PSM RT [min] (by Search Engine): Sequest HT	# PSMs	Abundances (Grouped): 1	Abundances (Grouped): 2	Abundances (Grouped): 3	Abundances (Grouped): 4	Abundance: F5: Sample, 1	Abundance: F6: Sample, 1	Abundance: F7: Sample, 2	Abundance: F8: Sample, 2	Abundance: F9: Sample, 3	Abundance: F10: Sample, 3	Abundance: F11: Sample, 4	Abundance: F12: Sample, 4
	C4ZX93 [105-127]	ADYADSLTENGTHGSDSVESAAR		0	3	785.011	38.2623	3	167.4	101.7	67.7	63.1	214777	262314	178376	116529	90306.5	102108	84859.9	94391.9
	C4ZX93 [128-141]	EIAYFFGEGEVCPR	1xCarbamidomethyl [C12]	0	2	837.385	55.8268	3	167.7	108.5	61.7	62	200643	236347	151440	131088	78196.5	82178.4	87389.2	74131.1
	C4ZX93 [88-104]	DLLGATNPANALAGTLR		0	2	834.456	59.1516	1	152.9	117.1	73.3	56.6	223429	238990	191061	163998	93591.2	131219	86377.5	84834.3
FALSE	B1XHI0	RNase adapter protein RapZ [OS=Escherichia coli str. K-12 substr. DH10B]	18	3	3	32.5	7.24	6	49.6	254.2	78.4	17.8	116473	107752	656140	501575	161365	193978	41597.2	38932.4
	Positions in Master Proteins	Sequence	Modifications	# Missed Cleavages	PSM Charge (by Search Engine): Sequest HT	PSM m/z [Da] (by Search Engine): Sequest HT	PSM RT [min] (by Search Engine): Sequest HT	# PSMs	Abundances (Grouped): 1	Abundances (Grouped): 2	Abundances (Grouped): 3	Abundances (Grouped): 4	Abundance: F5: Sample, 1	Abundance: F6: Sample, 1	Abundance: F7: Sample, 2	Abundance: F8: Sample, 2	Abundance: F9: Sample, 3	Abundance: F10: Sample, 3	Abundance: F11: Sample, 4	Abundance: F12: Sample, 4
	B1XHI0 [109-127]	NLSLESAIDKESDLLEPLR		1	3	714.714	61.9885	2	81.2	225.1	70.4	23.3	82987.6	107752	290357	236666	74256.3	90555.4	28061.6	26291.1
	B1XHI0 [171-184]	HGIPIDADYVFDVR		0	3	539.607	53.9968	2		210.1	71.6	18.3			185692	122067	47781.8	55121.9	13535.6	12641.3
	B1XHI0 [195-211]	LRPMTGLDKPVAAFLDR	1xOxidation [M4]	0	3	639.353	48.1532	2	42.3	202.6	55.1		33485.8		180091	142842	39326.8	48300.8
FALSE	P0A9J8	Bifunctional chorismate mutase/prephenate dehydratase [OS=Escherichia coli K-12]	9	2	2	43.1	6.68	6	136.5	109.4	54.1		475420	520032	463756	342633	208608	186046
	Positions in Master Proteins	Sequence	Modifications	# Missed Cleavages	PSM Charge (by Search Engine): Sequest HT	PSM m/z [Da] (by Search Engine): Sequest HT	PSM RT [min] (by Search Engine): Sequest HT	# PSMs	Abundances (Grouped): 1	Abundances (Grouped): 2	Abundances (Grouped): 3	Abundances (Grouped): 4	Abundance: F5: Sample, 1	Abundance: F6: Sample, 1	Abundance: F7: Sample, 2	Abundance: F8: Sample, 2	Abundance: F9: Sample, 3	Abundance: F10: Sample, 3	Abundance: F11: Sample, 4	Abundance: F12: Sample, 4
	P0A9J8 [246-268]	SPHVAALGSEAGGTLYGLQVLER		0	3	775.746	56.7011	5	150.8	92	57.2		339369	356008	229508	195948	132152	131570
	P0A9J8 [287-297]	AINVSDQVPAK		0	2	571.314	33.4301	1	112.2	139.3	48.5		136052	164024	234248	146685	76456.2	54475.1
FALSE	P0ADQ2	Probable acyltransferase FabY [OS=Escherichia coli K-12]	12	2	2	37.1	6.35	6	203.6	117.3	62.6	16.4	401321	396130	256981	205401	129138	116453	34703	29720.1
	Positions in Master Proteins	Sequence	Modifications	# Missed Cleavages	PSM Charge (by Search Engine): Sequest HT	PSM m/z [Da] (by Search Engine): Sequest HT	PSM RT [min] (by Search Engine): Sequest HT	# PSMs	Abundances (Grouped): 1	Abundances (Grouped): 2	Abundances (Grouped): 3	Abundances (Grouped): 4	Abundance: F5: Sample, 1	Abundance: F6: Sample, 1	Abundance: F7: Sample, 2	Abundance: F8: Sample, 2	Abundance: F9: Sample, 3	Abundance: F10: Sample, 3	Abundance: F11: Sample, 4	Abundance: F12: Sample, 4
	P0ADQ2 [244-257]	HLGGTIILADAHIR		0	3	496.289	42.9132	3	199.4	116.9	65.8	18	222940	205524	140481	112069	72592.6	68810.6	21111.4	17630.8
	P0ADQ2 [258-281]	YSKPISGKPHAVADLGALSGDLDR		0	4	617.58	43.6593	3	208.7	118	58.7	14.5	178381	190606	116500	93331.6	56545.4	47642.4	13591.6	12089.4
FALSE	P61517	Carbonic anhydrase 2 [OS=Escherichia coli K-12]	6	1	1	25.1	6.65	6	154.9	97.2	108.2	39.7	302012	351848	241484	173396	226445	229013	81915.9	85171.4
	Positions in Master Proteins	Sequence	Modifications	# Missed Cleavages	PSM Charge (by Search Engine): Sequest HT	PSM m/z [Da] (by Search Engine): Sequest HT	PSM RT [min] (by Search Engine): Sequest HT	# PSMs	Abundances (Grouped): 1	Abundances (Grouped): 2	Abundances (Grouped): 3	Abundances (Grouped): 4	Abundance: F5: Sample, 1	Abundance: F6: Sample, 1	Abundance: F7: Sample, 2	Abundance: F8: Sample, 2	Abundance: F9: Sample, 3	Abundance: F10: Sample, 3	Abundance: F11: Sample, 4	Abundance: F12: Sample, 4
	P61517 [52-64]	LTGLEPGELFVHR		0	3	489.937	51.8819	6	154.9	97.2	108.2	39.7	302012	351848	241484	173396	226445	229013	81915.9	85171.4
FALSE	B1XB98	ATP-dependent protease subunit HslV [OS=Escherichia coli str. K-12 substr. DH10B]	10	2	2	19.1	6.39	5	140.1	151	66.4	42.5	566597	652701	698030	615827	292270	284599	174102	195861
	Positions in Master Proteins	Sequence	Modifications	# Missed Cleavages	PSM Charge (by Search Engine): Sequest HT	PSM m/z [Da] (by Search Engine): Sequest HT	PSM RT [min] (by Search Engine): Sequest HT	# PSMs	Abundances (Grouped): 1	Abundances (Grouped): 2	Abundances (Grouped): 3	Abundances (Grouped): 4	Abundance: F5: Sample, 1	Abundance: F6: Sample, 1	Abundance: F7: Sample, 2	Abundance: F8: Sample, 2	Abundance: F9: Sample, 3	Abundance: F10: Sample, 3	Abundance: F11: Sample, 4	Abundance: F12: Sample, 4
	B1XB98 [136-146]	ALLENTELSAR		0	2	608.831	41.1933	4	152.5	143.5	64.7	39.4	501301	550292	510404	478427	226945	218716	129985	141335
	B1XB98 [75-81]	AAVELAK		0	2	351.213	26.0332	1	91.6	179.9	73.5	55	65295.9	102409	187626	137401	65324.7	65882.6	44116.4	54526.2
FALSE	C4ZRA8	Dual-action ribosomal maturation protein DarP [OS=Escherichia coli BW2952]	11	2	2	21.3	5.45	4	8.4	288.3	65.9	37.4	19085.7	25292.7	861065	657462	178380	166012	91234.1	104165
	Positions in Master Proteins	Sequence	Modifications	# Missed Cleavages	PSM Charge (by Search Engine): Sequest HT	PSM m/z [Da] (by Search Engine): Sequest HT	PSM RT [min] (by Search Engine): Sequest HT	# PSMs	Abundances (Grouped): 1	Abundances (Grouped): 2	Abundances (Grouped): 3	Abundances (Grouped): 4	Abundance: F5: Sample, 1	Abundance: F6: Sample, 1	Abundance: F7: Sample, 2	Abundance: F8: Sample, 2	Abundance: F9: Sample, 3	Abundance: F10: Sample, 3	Abundance: F11: Sample, 4	Abundance: F12: Sample, 4
	C4ZRA8 [108-117]	HNQQVVLFHK		0	3	417.231	30.2169	2		227.5	43.1	29.4			358458	277286	61141	58438.2	38096.6	43561.1
	C4ZRA8 [42-51]	LGAEIVDLGK		0	2	507.796	45.1646	2	14	278.4	71.5	36.1	19085.7	25292.7	502607	380176	117239	107574	53137.5	60603.7
FALSE	P0AB91	Phospho-2-dehydro-3-deoxyheptonate aldolase, Phe-sensitive [OS=Escherichia coli K-12]	9	2	2	38	6.6	4	202.1	138.6	42.9	16.4	360585	402128	285634	238682	84674.7	77089.5	30912.4
	Positions in Master Proteins	Sequence	Modifications	# Missed Cleavages	PSM Charge (by Search Engine): Sequest HT	PSM m/z [Da] (by Search Engine): Sequest HT	PSM RT [min] (by Search Engine): Sequest HT	# PSMs	Abundances (Grouped): 1	Abundances (Grouped): 2	Abundances (Grouped): 3	Abundances (Grouped): 4	Abundance: F5: Sample, 1	Abundance: F6: Sample, 1	Abundance: F7: Sample, 2	Abundance: F8: Sample, 2	Abundance: F9: Sample, 3	Abundance: F10: Sample, 3	Abundance: F11: Sample, 4	Abundance: F12: Sample, 4
	P0AB91 [106-124]	GLINDPHMDNSFQINDGLR	1xOxidation [M8]	0	3	724.677	47.7198	3	202.2	140	44.3	13.5	182030	206667	154211	116970	44664.6	40521.3	12941.8
	P0AB91 [174-186]	ELASGLSCPVGFK	1xCarbamidomethyl [C8]	0	2	682.849	46.2761	1	202.2	136.9	41.4	19.5	178555	195461	131423	121712	40010.1	36568.2	17970.5
FALSE	P0ACL0	Glycerol-3-phosphate regulon repressor [OS=Escherichia coli K-12]	4	1	1	28	6.27	4	182.7	142.8	58.3	16.2	308952	363532	276578	247986	105443	108503	30558.4	29074.7
	Positions in Master Proteins	Sequence	Modifications	# Missed Cleavages	PSM Charge (by Search Engine): Sequest HT	PSM m/z [Da] (by Search Engine): Sequest HT	PSM RT [min] (by Search Engine): Sequest HT	# PSMs	Abundances (Grouped): 1	Abundances (Grouped): 2	Abundances (Grouped): 3	Abundances (Grouped): 4	Abundance: F5: Sample, 1	Abundance: F6: Sample, 1	Abundance: F7: Sample, 2	Abundance: F8: Sample, 2	Abundance: F9: Sample, 3	Abundance: F10: Sample, 3	Abundance: F11: Sample, 4	Abundance: F12: Sample, 4
	P0ACL0 [137-145]	IILAGGELR		0	2	471.293	42.6881	4	182.7	142.8	58.3	16.2	308952	363532	276578	247986	105443	108503	30558.4	29074.7
FALSE	C4ZTH9	Exodeoxyribonuclease 7 small subunit [OS=Escherichia coli BW2952]	14	1	1	8.9	4.41	3	78.9	92.7	128.3		116802	129676	166380	125616	174396	229550
	Positions in Master Proteins	Sequence	Modifications	# Missed Cleavages	PSM Charge (by Search Engine): Sequest HT	PSM m/z [Da] (by Search Engine): Sequest HT	PSM RT [min] (by Search Engine): Sequest HT	# PSMs	Abundances (Grouped): 1	Abundances (Grouped): 2	Abundances (Grouped): 3	Abundances (Grouped): 4	Abundance: F5: Sample, 1	Abundance: F6: Sample, 1	Abundance: F7: Sample, 2	Abundance: F8: Sample, 2	Abundance: F9: Sample, 3	Abundance: F10: Sample, 3	Abundance: F11: Sample, 4	Abundance: F12: Sample, 4
	C4ZTH9 [14-24]	ALSELEQIVTR		0	2	629.854	53.4434	3	78.9	92.7	128.3		116802	129676	166380	125616	174396	229550
FALSE	P10902	L-aspartate oxidase [OS=Escherichia coli K-12]	3	1	1	60.3	6.34	3	4.4	244.2	111.2	40.2	10794.7	37667.4	1.18812e+06	1.06702e+06	519792	505140	198045	173763
	Positions in Master Proteins	Sequence	Modifications	# Missed Cleavages	PSM Charge (by Search Engine): Sequest HT	PSM m/z [Da] (by Search Engine): Sequest HT	PSM RT [min] (by Search Engine): Sequest HT	# PSMs	Abundances (Grouped): 1	Abundances (Grouped): 2	Abundances (Grouped): 3	Abundances (Grouped): 4	Abundance: F5: Sample, 1	Abundance: F6: Sample, 1	Abundance: F7: Sample, 2	Abundance: F8: Sample, 2	Abundance: F9: Sample, 3	Abundance: F10: Sample, 3	Abundance: F11: Sample, 4	Abundance: F12: Sample, 4
	P10902 [156-170]	VLERSNAVDLIVSDK		1	2	829.459	48.8492	3	4.4	244.2	111.2	40.2	10794.7	37667.4	1.18812e+06	1.06702e+06	519792	505140	198045	173763
FALSE	B1XHD4	Aspartate--tRNA ligase [OS=Escherichia coli str. K-12 substr. DH10B]	3	1	1	65.9	5.69	3		165.5	77	57.6			179000	136445	67519.3	78271.6	49939.6	59233.9
	Positions in Master Proteins	Sequence	Modifications	# Missed Cleavages	PSM Charge (by Search Engine): Sequest HT	PSM m/z [Da] (by Search Engine): Sequest HT	PSM RT [min] (by Search Engine): Sequest HT	# PSMs	Abundances (Grouped): 1	Abundances (Grouped): 2	Abundances (Grouped): 3	Abundances (Grouped): 4	Abundance: F5: Sample, 1	Abundance: F6: Sample, 1	Abundance: F7: Sample, 2	Abundance: F8: Sample, 2	Abundance: F9: Sample, 3	Abundance: F10: Sample, 3	Abundance: F11: Sample, 4	Abundance: F12: Sample, 4
	B1XHD4 [105-121]	ADVLPLDSNHVNTEEAR		0	3	627.31	39.3617	3		165.5	77	57.6			179000	136445	67519.3	78271.6	49939.6	59233.9
FALSE	strep-sfGFP[frame-3]	strep-sfGFP[frame-3]	2	1	1	34.3	10.83	3	102	98			406317	459127	444433	388134
	Positions in Master Proteins	Sequence	Modifications	# Missed Cleavages	PSM Charge (by Search Engine): Sequest HT	PSM m/z [Da] (by Search Engine): Sequest HT	PSM RT [min] (by Search Engine): Sequest HT	# PSMs	Abundances (Grouped): 1	Abundances (Grouped): 2	Abundances (Grouped): 3	Abundances (Grouped): 4	Abundance: F5: Sample, 1	Abundance: F6: Sample, 1	Abundance: F7: Sample, 2	Abundance: F8: Sample, 2	Abundance: F9: Sample, 3	Abundance: F10: Sample, 3	Abundance: F11: Sample, 4	Abundance: F12: Sample, 4
	strep-sfGFP[frame-3] [207-212]	FATTLK		0	2	340.702	30.4523	3	102	98			406317	459127	444433	388134
FALSE	P0A910	Outer membrane protein A [OS=Escherichia coli K-12]	14	3	3	37.2	6.42	3	19.6	264.8	76.3	39.4	32995.4	38512.8	553531	420071	134823	143215	67474.4	76258.7
	Positions in Master Proteins	Sequence	Modifications	# Missed Cleavages	PSM Charge (by Search Engine): Sequest HT	PSM m/z [Da] (by Search Engine): Sequest HT	PSM RT [min] (by Search Engine): Sequest HT	# PSMs	Abundances (Grouped): 1	Abundances (Grouped): 2	Abundances (Grouped): 3	Abundances (Grouped): 4	Abundance: F5: Sample, 1	Abundance: F6: Sample, 1	Abundance: F7: Sample, 2	Abundance: F8: Sample, 2	Abundance: F9: Sample, 3	Abundance: F10: Sample, 3	Abundance: F11: Sample, 4	Abundance: F12: Sample, 4
	P0A910 [228-251]	ATLKPEGQAALDQLYSQLSNLDPK		0	3	867.458	65.0559	1	56.7	237.1	63.9	42.3	32995.4	38512.8	165312	134594	37441.1	43160.9	29692.6	23865.9
	P0A910 [252-263]	DGSVVVLGYTDR		0	2	640.827	45.3617	1		210.6	60.8	28.6			182268	135574	43858.1	47041.7	17555.5	25946.7
	P0A910 [264-276]	IGSDAYNQGLSER		0	2	705.336	34.4756	1		209.1	63.4	27.5			205951	149903	53523.3	53012.1	20226.2	26446.1
FALSE	C4ZPU1	Chaperone protein DnaJ [OS=Escherichia coli BW2952]	9	2	2	41.1	7.84	3	22.8	310.7	52.6	13.9	23210.1	28522.3	395911	311696	59672.4	59220.9	15759.5
	Positions in Master Proteins	Sequence	Modifications	# Missed Cleavages	PSM Charge (by Search Engine): Sequest HT	PSM m/z [Da] (by Search Engine): Sequest HT	PSM RT [min] (by Search Engine): Sequest HT	# PSMs	Abundances (Grouped): 1	Abundances (Grouped): 2	Abundances (Grouped): 3	Abundances (Grouped): 4	Abundance: F5: Sample, 1	Abundance: F6: Sample, 1	Abundance: F7: Sample, 2	Abundance: F8: Sample, 2	Abundance: F9: Sample, 3	Abundance: F10: Sample, 3	Abundance: F11: Sample, 4	Abundance: F12: Sample, 4
	C4ZPU1 [339-359]	QLLQELQESFGGPTGEHNSPR		0	3	775.38	55.4186	2		100					208254	176321
	C4ZPU1 [52-62]	EAYEVLTDSQK		0	2	641.812	37.4881	1	39.5	244.9	91.3	24.2	23210.1	28522.3	187656	135375	59672.4	59220.9	15759.5
FALSE	C4ZSR1	Ribosome maturation factor RimP [OS=Escherichia coli BW2952]	7	1	1	16.8	4.7	3	60	176.3	118.3	45.4	65846.7	88182.6	233077	214650	140814	160027	58628.4	56605.1
	Positions in Master Proteins	Sequence	Modifications	# Missed Cleavages	PSM Charge (by Search Engine): Sequest HT	PSM m/z [Da] (by Search Engine): Sequest HT	PSM RT [min] (by Search Engine): Sequest HT	# PSMs	Abundances (Grouped): 1	Abundances (Grouped): 2	Abundances (Grouped): 3	Abundances (Grouped): 4	Abundance: F5: Sample, 1	Abundance: F6: Sample, 1	Abundance: F7: Sample, 2	Abundance: F8: Sample, 2	Abundance: F9: Sample, 3	Abundance: F10: Sample, 3	Abundance: F11: Sample, 4	Abundance: F12: Sample, 4
	C4ZSR1 [96-106]	FVGEEVTLVLR		0	2	631.366	55.4432	3	60	176.3	118.3	45.4	65846.7	88182.6	233077	214650	140814	160027	58628.4	56605.1
FALSE	P69913	Carbon storage regulator [OS=Escherichia coli K-12]	11	1	1	6.9	8.62	2	16.5	242.1	89.5	51.9		16958.3	290163	212966	90828.1	92969.5	49926.5	56836.5
	Positions in Master Proteins	Sequence	Modifications	# Missed Cleavages	PSM Charge (by Search Engine): Sequest HT	PSM m/z [Da] (by Search Engine): Sequest HT	PSM RT [min] (by Search Engine): Sequest HT	# PSMs	Abundances (Grouped): 1	Abundances (Grouped): 2	Abundances (Grouped): 3	Abundances (Grouped): 4	Abundance: F5: Sample, 1	Abundance: F6: Sample, 1	Abundance: F7: Sample, 2	Abundance: F8: Sample, 2	Abundance: F9: Sample, 3	Abundance: F10: Sample, 3	Abundance: F11: Sample, 4	Abundance: F12: Sample, 4
	P69913 [32-38]	IGVNAPK		0	2	349.713	26.0468	2	16.5	242.1	89.5	51.9		16958.3	290163	212966	90828.1	92969.5	49926.5	56836.5
FALSE	C4ZUQ6	33 kDa chaperonin [OS=Escherichia coli BW2952]	11	2	2	32.5	4.49	2	205.4	97.8	59.6	37.2	346335	421116	183626	180241	105754	116280	73537.9	65003.8
	Positions in Master Proteins	Sequence	Modifications	# Missed Cleavages	PSM Charge (by Search Engine): Sequest HT	PSM m/z [Da] (by Search Engine): Sequest HT	PSM RT [min] (by Search Engine): Sequest HT	# PSMs	Abundances (Grouped): 1	Abundances (Grouped): 2	Abundances (Grouped): 3	Abundances (Grouped): 4	Abundance: F5: Sample, 1	Abundance: F6: Sample, 1	Abundance: F7: Sample, 2	Abundance: F8: Sample, 2	Abundance: F9: Sample, 3	Abundance: F10: Sample, 3	Abundance: F11: Sample, 4	Abundance: F12: Sample, 4
	C4ZUQ6 [197-211]	TEELLTLPANEVLWR		0	2	892.484	63.4964	1	243.8	64	56.9	35.3	118112	154568	34461.4	36481.2	28198.7	35243.9	20456.8	18716.8
	C4ZUQ6 [212-229]	LYHEEEVTVYDPQDVEFK		0	3	747.354	48.5952	1	189	112.2	60.8	38	228223	266549	149164	143760	77555.6	81036.2	53081.1	46287
FALSE	B1XBC2	Acetylornithine deacetylase [OS=Escherichia coli str. K-12 substr. DH10B]	9	2	2	42.3	5.9	2	49.6	234.3	104.8	11.3	57684.6	107695	420954	329974	167901	165442		18006.7
	Positions in Master Proteins	Sequence	Modifications	# Missed Cleavages	PSM Charge (by Search Engine): Sequest HT	PSM m/z [Da] (by Search Engine): Sequest HT	PSM RT [min] (by Search Engine): Sequest HT	# PSMs	Abundances (Grouped): 1	Abundances (Grouped): 2	Abundances (Grouped): 3	Abundances (Grouped): 4	Abundance: F5: Sample, 1	Abundance: F6: Sample, 1	Abundance: F7: Sample, 2	Abundance: F8: Sample, 2	Abundance: F9: Sample, 3	Abundance: F10: Sample, 3	Abundance: F11: Sample, 4	Abundance: F12: Sample, 4
	B1XBC2 [153-177]	YFAETTALRPDCAIIGEPTSLQPVR	1xCarbamidomethyl [C12]	0	3	935.816	53.9028	1	54.6	183	62.4			42429.7	158001	128173	43497.4	54195
	B1XBC2 [94-104]	DPFTLTEHDGK		0	2	630.298	37.8795	1	57.4	215.6	110.1	16.9	57684.6	65265.1	262953	201801	124403	111247		18006.7
FALSE	P37765	Ribosomal large subunit pseudouridine synthase B [OS=Escherichia coli K-12]	3	1	1	32.7	10.02	2		82.3	50.5	167.2			107871	88146.2	61643	58250.9	199181	197248
	Positions in Master Proteins	Sequence	Modifications	# Missed Cleavages	PSM Charge (by Search Engine): Sequest HT	PSM m/z [Da] (by Search Engine): Sequest HT	PSM RT [min] (by Search Engine): Sequest HT	# PSMs	Abundances (Grouped): 1	Abundances (Grouped): 2	Abundances (Grouped): 3	Abundances (Grouped): 4	Abundance: F5: Sample, 1	Abundance: F6: Sample, 1	Abundance: F7: Sample, 2	Abundance: F8: Sample, 2	Abundance: F9: Sample, 3	Abundance: F10: Sample, 3	Abundance: F11: Sample, 4	Abundance: F12: Sample, 4
	P37765 [19-28]	EIESIIEAGR		0	2	558.799	43.6281	2		82.3	50.5	167.2			107871	88146.2	61643	58250.9	199181	197248
FALSE	P00954	Tryptophan--tRNA ligase [OS=Escherichia coli K-12]	3	1	1	37.4	6.74	2	233.4	77.2	69.5	19.9	199179	259136	75041.4	75328.5	56652.8	80830.6	20238.6	18504.6
	Positions in Master Proteins	Sequence	Modifications	# Missed Cleavages	PSM Charge (by Search Engine): Sequest HT	PSM m/z [Da] (by Search Engine): Sequest HT	PSM RT [min] (by Search Engine): Sequest HT	# PSMs	Abundances (Grouped): 1	Abundances (Grouped): 2	Abundances (Grouped): 3	Abundances (Grouped): 4	Abundance: F5: Sample, 1	Abundance: F6: Sample, 1	Abundance: F7: Sample, 2	Abundance: F8: Sample, 2	Abundance: F9: Sample, 3	Abundance: F10: Sample, 3	Abundance: F11: Sample, 4	Abundance: F12: Sample, 4
	P00954 [204-214]	NNVIGLLEDPK		0	2	606.336	51.4755	2	233.4	77.2	69.5	19.9	199179	259136	75041.4	75328.5	56652.8	80830.6	20238.6	18504.6
FALSE	P03024	HTH-type transcriptional regulator GalR [OS=Escherichia coli K-12]	3	1	1	37.1	6.27	2	36.9	201.7	92	69.3	37184.8	36887.5	227893	179612	91094.8	93476	69619	69430.2
	Positions in Master Proteins	Sequence	Modifications	# Missed Cleavages	PSM Charge (by Search Engine): Sequest HT	PSM m/z [Da] (by Search Engine): Sequest HT	PSM RT [min] (by Search Engine): Sequest HT	# PSMs	Abundances (Grouped): 1	Abundances (Grouped): 2	Abundances (Grouped): 3	Abundances (Grouped): 4	Abundance: F5: Sample, 1	Abundance: F6: Sample, 1	Abundance: F7: Sample, 2	Abundance: F8: Sample, 2	Abundance: F9: Sample, 3	Abundance: F10: Sample, 3	Abundance: F11: Sample, 4	Abundance: F12: Sample, 4
	P03024 [10-20]	LAGVSVATVSR		0	2	530.312	37.4482	2	36.9	201.7	92	69.3	37184.8	36887.5	227893	179612	91094.8	93476	69619	69430.2
FALSE	P0ACJ8	DNA-binding transcriptional dual regulator CRP [OS=Escherichia coli K-12]	6	1	1	23.6	8.25	2		100					360230	306545
	Positions in Master Proteins	Sequence	Modifications	# Missed Cleavages	PSM Charge (by Search Engine): Sequest HT	PSM m/z [Da] (by Search Engine): Sequest HT	PSM RT [min] (by Search Engine): Sequest HT	# PSMs	Abundances (Grouped): 1	Abundances (Grouped): 2	Abundances (Grouped): 3	Abundances (Grouped): 4	Abundance: F5: Sample, 1	Abundance: F6: Sample, 1	Abundance: F7: Sample, 2	Abundance: F8: Sample, 2	Abundance: F9: Sample, 3	Abundance: F10: Sample, 3	Abundance: F11: Sample, 4	Abundance: F12: Sample, 4
	P0ACJ8 [132-143]	VGNLAFLDVTGR		0	2	631.346	55.4824	2		100					360230	306545
FALSE	P0AFG8	Pyruvate dehydrogenase E1 component [OS=Escherichia coli K-12]	2	2	2	99.6	5.68	2	240.1	128.4	23.1	8.4	281219	315827	176906	143421	33913.1	24296.4	10386.7
	Positions in Master Proteins	Sequence	Modifications	# Missed Cleavages	PSM Charge (by Search Engine): Sequest HT	PSM m/z [Da] (by Search Engine): Sequest HT	PSM RT [min] (by Search Engine): Sequest HT	# PSMs	Abundances (Grouped): 1	Abundances (Grouped): 2	Abundances (Grouped): 3	Abundances (Grouped): 4	Abundance: F5: Sample, 1	Abundance: F6: Sample, 1	Abundance: F7: Sample, 2	Abundance: F8: Sample, 2	Abundance: F9: Sample, 3	Abundance: F10: Sample, 3	Abundance: F11: Sample, 4	Abundance: F12: Sample, 4
	P0AFG8 [516-525]	LVPIIADEAR		0	2	548.822	44.8024	1	219.7	119.5	44.7	16.2	126228	157959	82855.7	71247.4	33913.1	24296.4	10386.7
	P0AFG8 [727-737]	VQLLGSGSILR		0	2	571.847	50.2405	1	131	69			154991	157867	94050.1	72173.2
FALSE	C4ZYH9	Large ribosomal subunit protein bL35 [OS=Escherichia coli BW2952]	20	1	1	7.3	11.78	2	5.3	236.5	128.9	29.2	23813.1	26028.4	1255078	966200	535712	672941	139116	132884
	Positions in Master Proteins	Sequence	Modifications	# Missed Cleavages	PSM Charge (by Search Engine): Sequest HT	PSM m/z [Da] (by Search Engine): Sequest HT	PSM RT [min] (by Search Engine): Sequest HT	# PSMs	Abundances (Grouped): 1	Abundances (Grouped): 2	Abundances (Grouped): 3	Abundances (Grouped): 4	Abundance: F5: Sample, 1	Abundance: F6: Sample, 1	Abundance: F7: Sample, 2	Abundance: F8: Sample, 2	Abundance: F9: Sample, 3	Abundance: F10: Sample, 3	Abundance: F11: Sample, 4	Abundance: F12: Sample, 4
	C4ZYH9 [53-65]	GDLGLVIACLPYA	1xCarbamidomethyl [C9]	0	2	681.36	70.2286	2	5.3	236.5	128.9	29.2	23813.1	26028.4	1255078	966200	535712	672941	139116	132884
FALSE	P77445	Acetaldehyde dehydrogenase (acetylating) EutE [OS=Escherichia coli K-12]	2	1	1	49	6.62	1		100					296552	247188
	Positions in Master Proteins	Sequence	Modifications	# Missed Cleavages	PSM Charge (by Search Engine): Sequest HT	PSM m/z [Da] (by Search Engine): Sequest HT	PSM RT [min] (by Search Engine): Sequest HT	# PSMs	Abundances (Grouped): 1	Abundances (Grouped): 2	Abundances (Grouped): 3	Abundances (Grouped): 4	Abundance: F5: Sample, 1	Abundance: F6: Sample, 1	Abundance: F7: Sample, 2	Abundance: F8: Sample, 2	Abundance: F9: Sample, 3	Abundance: F10: Sample, 3	Abundance: F11: Sample, 4	Abundance: F12: Sample, 4
	P77445 [333-340]	IAAAIGLK		0	2	378.752	36.0492	1		100					296552	247188
FALSE	P0A705	Translation initiation factor IF-2 [OS=Escherichia coli K-12]	1	1	1	97.3	6.07	1	9.1	205.3	124.1	61.5		5963.74	153478	117724	80755.1	81775.8	37243.7	43525.3
	Positions in Master Proteins	Sequence	Modifications	# Missed Cleavages	PSM Charge (by Search Engine): Sequest HT	PSM m/z [Da] (by Search Engine): Sequest HT	PSM RT [min] (by Search Engine): Sequest HT	# PSMs	Abundances (Grouped): 1	Abundances (Grouped): 2	Abundances (Grouped): 3	Abundances (Grouped): 4	Abundance: F5: Sample, 1	Abundance: F6: Sample, 1	Abundance: F7: Sample, 2	Abundance: F8: Sample, 2	Abundance: F9: Sample, 3	Abundance: F10: Sample, 3	Abundance: F11: Sample, 4	Abundance: F12: Sample, 4
	P0A705 [102-110]	LAAEEQAQR		0	2	508.262	22.3999	1	9.1	205.3	124.1	61.5		5963.74	153478	117724	80755.1	81775.8	37243.7	43525.3
FALSE	P33650	Fe(2+) transporter FeoB [OS=Escherichia coli K-12]	1	1	1	84.4	6.19	1	126.8	129.3	60.4	83.5	357074	431876	444149	360689	197334	177322	265414	251943
	Positions in Master Proteins	Sequence	Modifications	# Missed Cleavages	PSM Charge (by Search Engine): Sequest HT	PSM m/z [Da] (by Search Engine): Sequest HT	PSM RT [min] (by Search Engine): Sequest HT	# PSMs	Abundances (Grouped): 1	Abundances (Grouped): 2	Abundances (Grouped): 3	Abundances (Grouped): 4	Abundance: F5: Sample, 1	Abundance: F6: Sample, 1	Abundance: F7: Sample, 2	Abundance: F8: Sample, 2	Abundance: F9: Sample, 3	Abundance: F10: Sample, 3	Abundance: F11: Sample, 4	Abundance: F12: Sample, 4
	P33650 [749-757]	VDIELLATR		0	2	515.302	45.8936	1	126.8	129.3	60.4	83.5	357074	431876	444149	360689	197334	177322	265414	251943
FALSE	P0A968	Cold shock-like protein CspD [OS=Escherichia coli K-12]	19	1	1	8	6.25	1	34.4	205.9	80.2	79.5	20343.4	22869.8	140214	118585	52363.8	48134.6	49673.9	49859.6
	Positions in Master Proteins	Sequence	Modifications	# Missed Cleavages	PSM Charge (by Search Engine): Sequest HT	PSM m/z [Da] (by Search Engine): Sequest HT	PSM RT [min] (by Search Engine): Sequest HT	# PSMs	Abundances (Grouped): 1	Abundances (Grouped): 2	Abundances (Grouped): 3	Abundances (Grouped): 4	Abundance: F5: Sample, 1	Abundance: F6: Sample, 1	Abundance: F7: Sample, 2	Abundance: F8: Sample, 2	Abundance: F9: Sample, 3	Abundance: F10: Sample, 3	Abundance: F11: Sample, 4	Abundance: F12: Sample, 4
	P0A968 [44-57]	AGQSVQFDVHQGPK		0	3	499.92	33.0557	1	34.4	205.9	80.2	79.5	20343.4	22869.8	140214	118585	52363.8	48134.6	49673.9	49859.6

## Sheet: Proteins (2)
									1	2	3	4	1	1	2	2	3	3	4	4
								ribosome	N.R	R.R	R.R	R.R	N.R	N.R	R.R	R.R	R.R	R.R	R.R	R.R
								GTPase		+		+			+	+			+	+
								GFP gene	+	+	+		+	+	+	+	+	+
Checked	Accession	Description	Coverage [%]	# Peptides	# Unique Peptides	MW [kDa]	calc. pI	# PSMs	Abundances (Grouped): 1	Abundances (Grouped): 2	Abundances (Grouped): 3	Abundances (Grouped): 4	Abundance: F5: Sample, 1	Abundance: F6: Sample, 1	Abundance: F7: Sample, 2	Abundance: F8: Sample, 2	Abundance: F9: Sample, 3	Abundance: F10: Sample, 3	Abundance: F11: Sample, 4	Abundance: F12: Sample, 4
FALSE	P0CE47	Elongation factor Tu 1 [OS=Escherichia coli K-12]	87	29	29	43.3	5.45	904	161	125.9	98.2	14.9	1.85484e+09	2.13216e+09	1.73532e+09	1.39353e+09	1.18022e+09	1.24846e+09	1.83853e+08	1.85373e+08
	Positions in Master Proteins	Sequence	Modifications	# Missed Cleavages	PSM Charge (by Search Engine): Sequest HT	PSM m/z [Da] (by Search Engine): Sequest HT	PSM RT [min] (by Search Engine): Sequest HT	# PSMs	Abundances (Grouped): 1	Abundances (Grouped): 2	Abundances (Grouped): 3	Abundances (Grouped): 4	Abundance: F5: Sample, 1	Abundance: F6: Sample, 1	Abundance: F7: Sample, 2	Abundance: F8: Sample, 2	Abundance: F9: Sample, 3	Abundance: F10: Sample, 3	Abundance: F11: Sample, 4	Abundance: F12: Sample, 4
	P0CE47 [118-124]	EHILLGR		0	2	419.251	31.3013	30	159	130.4	98.5	12.1	70807544	81623768	68384544	56851688	45701676	48465988	5.45631e+06	6.08922e+06
	P0CE47 [125-137]	QVGVPYIIVFLNK		0	2	745.442	69.2695	24	216.6	77.9	89.8	15.8	2.64517e+07	31546502	1.15747e+07	9.33453e+06	1.21301e+07	1.18176e+07	2.34595e+06	1.88491e+06
	P0CE47 [138-155]	CDMVDDEELLELVEMEVR	1xCarbamidomethyl [C1]	0	2	1112.5	75.6074	12	263.8	66.8	56	13.5	2.20503e+06	2.93935e+06	739352	561510	522093	560113	163234	103479
	P0CE47 [138-155]	CDMVDDEELLELVEMEVR	1xCarbamidomethyl [C1]; 1xOxidation [M]	0	2	1120.49	73.1889	22	221.3	94.8	68	15.9	3925094	5171044	2.12124e+06	1.7567e+06	1.24803e+06	1.53326e+06	402941	259044
	P0CE47 [138-155]	CDMVDDEELLELVEMEVR	1xCarbamidomethyl [C1]; 2xOxidation [M3; M15]	0	3	752.663	71.3936	15	183.3	93.4	100.7	22.6	2.4847e+06	3.34344e+06	1.58859e+06	1.35865e+06	1.41151e+06	1775563	414100	305452
	P0CE47 [156-172]	ELLSQYDFPGDDTPIVR		0	2	982.983	56.6675	32	178.4	114.5	90.6	16.5	4.12199e+07	49225263	3.41624e+07	24482817	2.14906e+07	2.43471e+07	4.58973e+06	3.77875e+06
	P0CE47 [178-188]	ALEGDAEWEAK		0	2	609.785	38.0065	17	169.6	120.2	97	13.3	67321904	74386024	57114908	44014336	38765988	42226468	5440765	5653777
	P0CE47 [189-205]	ILELAGFLDSYIPEPER		0	2	981.514	72.5541	25	210.4	96.1	76.6	16.9	4.90214e+07	6.30158e+07	2.9398e+07	2.19457e+07	1.88328e+07	2.17644e+07	5.57136e+06	3.56931e+06
	P0CE47 [206-224]	AIDKPFLLPIEDVFSISGR		0	3	706.393	70.3549	31	200.5	110.4	72.5	16.7	9.41223e+07	1.15498e+08	5.66014e+07	5.81933e+07	3.36641e+07	4.21957e+07	1.00334e+07	7.49789e+06
	P0CE47 [239-249]	VGEEVEIVGIK		0	2	586.332	45.3907	26	166.1	121.6	98.3	13.9	163880512	180678848	147048336	107896944	100332768	103399256	14352067	14539719
	P0CE47 [254-263]	STCTGVEMFR	1xCarbamidomethyl [C3]	0	2	594.262	41.1696	12	178	117.6	94.2	10.2	22939332	28461812	18835570	15139693	13295255	13750418	1.39455e+06	1.53585e+06
	P0CE47 [254-263]	STCTGVEMFR	1xCarbamidomethyl [C3]; 1xOxidation [M8]	0	2	602.26	33.8741	26	144.6	149.3	96.7	9.4	41901402	43713566	48511104	40241784	28352947	28905779	2.60553e+06	2.97642e+06
	P0CE47 [254-264]	STCTGVEMFRK	1xCarbamidomethyl [C3]	1	2	658.308	34.8247	4	250.6	53.9	78.6	16.9	3.70681e+06	4.35517e+06	1.00611e+06	741154	1.22952e+06	1.29233e+06	248831	294128
	P0CE47 [254-264]	STCTGVEMFRK	1xCarbamidomethyl [C3]; 1xOxidation [M8]	1	3	444.541	28.6999	1	213.4	80.3	89.6	16.7	3.27392e+06	3.70248e+06	1.45007e+06	1.18318e+06	1.50299e+06	1.42385e+06	253166	293962
	P0CE47 [26-38]	TTLTAAITTVLAK		0	2	652.396	61.6695	48	156.7	126.3	103.2	13.9	2.22484e+08	2.47901e+08	2.12161e+08	1.68849e+08	1.46305e+08	1.63395e+08	2.13934e+07	2.02626e+07
	P0CE47 [264-270]	KLLDEGR		1	2	415.74	24.3229	17	164	125.3	97.3	13.4	15029305	16296768	13012398	10994880	8961844	9616147	1.29362e+06	1.26468e+06
	P0CE47 [265-270]	LLDEGR		0	2	351.693	25.3254	8	96.2	169.1	119.4	15.3	14458549	21206340	34005284	27871450	22631528	20877272	2476822	3.12868e+06
	P0CE47 [271-280]	AGENVGVLLR		0	2	514.299	42.9875	31	168.7	119.9	97.9	13.5	1.49092e+08	161064256	118318656	1.02431e+08	91004432	88876560	12013330	12870770
	P0CE47 [290-304]	GQVLAKPGTIKPHTK		0	3	525.651	24.0601	43	187.9	94.8	100.1	17.2	4.86125e+07	5.22347e+07	2.87885e+07	2.24569e+07	2.63692e+07	2.73244e+07	4.22733e+06	5.01681e+06
	P0CE47 [305-314]	FESEVYILSK		0	2	607.819	48.0457	21	152.1	128.2	103.6	16.1	120361560	118734592	107609568	94342032	77047184	85956776	13049145	12271618
	P0CE47 [305-319]	FESEVYILSKDEGGR		1	3	576.953	44.9279	9	289.5	7	66.9	36.6	2.95203e+06	3.07024e+06	90877.3	58726.5	709570	681434	364458	398581
	P0CE47 [320-325]	HTPFFK		0	2	388.708	31.697	17	173.6	123.6	90.6	12.2	79546544	92402696	66162576	56317592	44349856	45089856	5.53379e+06	6523798
	P0CE47 [326-334]	GYRPQFYFR		0	3	411.877	44.3851	29	198.9	100.8	89	11.4	52356301	60382336	32284194	2.51355e+07	25348842	24955006	2.99539e+06	3.44937e+06
	P0CE47 [335-358]	TTDVTGTIELPEGVEMVMPGDNIK		0	2	1273.62	62.5432	12	200.9	79	101.7	18.5	12040611	1.47394e+07	6.03715e+06	4.54133e+06	6.21873e+06	7.31125e+06	1.40018e+06	1.07467e+06
	P0CE47 [335-358]	TTDVTGTIELPEGVEMVMPGDNIK	1xOxidation [M]	0	3	854.747	58.385	26	166.9	113.2	102.2	17.7	1.26725e+07	14249926	1.03696e+07	8.01843e+06	7.57553e+06	8.9448e+06	1.59892e+06	1.26656e+06
	P0CE47 [335-358]	TTDVTGTIELPEGVEMVMPGDNIK	2xOxidation [M16; M18]	0	2	1289.62	53.1556	11	152	119	109.9	19.1	2.31881e+07	25331965	2.17432e+07	16555414	1.73197e+07	17714689	3.03249e+06	3.04111e+06
	P0CE47 [359-374]	MVVTLIHPIAMDDGLR		0	2	890.976	55.5583	15	224.4	60.1	97	18.5	28017031	35541642	9.88408e+06	7.23274e+06	1.27649e+07	1.4568e+07	2.7752e+06	2.43547e+06
	P0CE47 [359-374]	MVVTLIHPIAMDDGLR	1xOxidation [M]	0	3	599.653	52.4749	45	179	105.9	98.8	16.3	4.95472e+07	6.33708e+07	3.8743e+07	2.83994e+07	2.85946e+07	3.34732e+07	5.20806e+06	4.98601e+06
	P0CE47 [359-374]	MVVTLIHPIAMDDGLR	2xOxidation [M1; M11]	0	3	604.983	47.6288	24	156.6	132.2	97.4	13.8	7.1835e+07	8.14743e+07	7.00427e+07	5.95878e+07	4.46779e+07	5.06683e+07	6.63442e+06	6.83143e+06
	P0CE47 [383-391]	TVGAGVVAK		0	2	401.245	25.4885	19	109	161	115.2	14.8	33211136	54939356	69616464	57146852	46211696	44114864	5.14135e+06	6.56606e+06
	P0CE47 [39-45]	TYGGAAR		0	2	348.177	19.3675	7	43.2	181.2	155.6	19.9	2.65528e+06	3.74002e+06	14645574	11910100	11353214	11326419	1.28786e+06	1.63805e+06
	P0CE47 [46-57]	AFDQIDNAPEEK		0	2	688.819	36.218	21	156.9	129	99.9	14.2	1.1729e+08	1.34013e+08	1.15944e+08	9.15561e+07	8.01705e+07	7.9532e+07	1.04127e+07	1.22903e+07
	P0CE47 [46-59]	AFDQIDNAPEEKAR		1	3	535.263	33.4418	1	78.6	246.8	61.6	13	251586	312670	996611	778860	219790	219777	41417.6	51930.9
	P0CE47 [60-75]	GITINTSHVEYDTPTR		0	2	902.446	39.5509	58	159.3	127.1	99.8	13.8	1.40646e+08	1.61931e+08	1.39172e+08	1.04157e+08	9.08527e+07	9.83495e+07	1.25403e+07	1.36545e+07
	P0CE47 [76-90]	HYAHVDCPGHADYVK	1xCarbamidomethyl [C7]	0	4	442.952	27.2166	16	128.8	136.9	113.4	20.8	3.08e+07	3.82866e+07	4.55347e+07	2.92556e+07	3.04903e+07	2.99634e+07	5.26385e+06	5.85234e+06
	P0CE47 [9-25]	TKPHVNVGTIGHVDHGK		0	3	599.322	25.8602	30	16.4	271.7	86.5	25.4	3.67986e+06	4.49806e+06	73851448	6.16749e+07	23046982	2.00567e+07	5.55451e+06	7.181e+06
	P0CE47 [91-117]	NMITGAAQMDGAILVVAATDGPMPQTR		0	3	910.453	67.4567	16	193.2	93.1	77.2	36.4	3.83547e+06	6.55872e+06	3.06669e+06	1.90338e+06	2.14686e+06	1.87256e+06	1.15761e+06	772581
	P0CE47 [91-117]	NMITGAAQMDGAILVVAATDGPMPQTR	1xOxidation [M]	0	3	915.782	63.057	39	157.3	108.1	100.9	33.6	6.82456e+06	8.92172e+06	6.35751e+06	4.52358e+06	4.51614e+06	5.54637e+06	2.07351e+06	1.33873e+06
	P0CE47 [91-117]	NMITGAAQMDGAILVVAATDGPMPQTR	2xOxidation [M9; M]	0	3	921.116	58.7749	42	151.8	122	100.9	25.3	8.61623e+06	1.08561e+07	8.99398e+06	6.7246e+06	6.17722e+06	6.69509e+06	1.88624e+06	1.37353e+06
	P0CE47 [91-117]	NMITGAAQMDGAILVVAATDGPMPQTR	3xOxidation [M2; M9; M23]	0	3	926.448	55.9489	22	167.2	115.9	101	15.8	1.1576e+07	1.24423e+07	9.34724e+06	7.40431e+06	6.67567e+06	7.87608e+06	1.2255e+06	1.05027e+06
FALSE	strep-sfGFP	strep-sfGFP	93	25	25	29.2	6.4	821	271.4	127.9	0.5	0.3	8.00501e+09	9.18347e+09	4.47784e+09	3.64503e+09	2.05012e+07	1.00898e+07	1.21207e+07	6.13436e+06
	Positions in Master Proteins	Sequence	Modifications	# Missed Cleavages	PSM Charge (by Search Engine): Sequest HT	PSM m/z [Da] (by Search Engine): Sequest HT	PSM RT [min] (by Search Engine): Sequest HT	# PSMs	Abundances (Grouped): 1	Abundances (Grouped): 2	Abundances (Grouped): 3	Abundances (Grouped): 4	Abundance: F5: Sample, 1	Abundance: F6: Sample, 1	Abundance: F7: Sample, 2	Abundance: F8: Sample, 2	Abundance: F9: Sample, 3	Abundance: F10: Sample, 3	Abundance: F11: Sample, 4	Abundance: F12: Sample, 4
	strep-sfGFP [1-12]	MASTWSHPQFEK		0	3	483.56	38.2389	8	169	31			1.72123e+07	2.13729e+07	4.23245e+06	2.91497e+06
	strep-sfGFP [1-12]	MASTWSHPQFEK	1xOxidation [M1]	0	3	488.89	35.9244	19	145.9	54.1			3.56897e+07	4.11825e+07	1.68272e+07	1.19797e+07
	strep-sfGFP [13-24]	LEVLFQGPHMSK		0	2	693.365	45.9992	36	303.1	96.6	0.3	0	588834528	680572080	220359008	184852910	821464	394164	72502	41144.2
	strep-sfGFP [13-24]	LEVLFQGPHMSK	1xOxidation [M10]	0	2	701.363	41.7503	100	239.8	159.5	0.6	0.1	7.47533e+08	7.98231e+08	5.59401e+08	4.71797e+08	2.55247e+06	1.32755e+06	325561	173382
	strep-sfGFP [25-47]	GEELFTGVVPILVELDGDVNGHK		0	2	1219.13	74.3046	76	280.9	115.1	1.8	2.2	4.73792e+08	5.75997e+08	2.35735e+08	1.9424e+08	4.81223e+06	2.36706e+06	5.60759e+06	3.0131e+06
	strep-sfGFP [48-62]	FSVRGEGEGDATNGK		1	3	508.575	28.0953	1	115.8	84.2			170045	189529	150282	113441
	strep-sfGFP [52-62]	GEGEGDATNGK		0	2	517.723	17.6461	1	56.3	243.4	0.3		5669051	9056827	26030704	36845864	51010.5	37590.5
	strep-sfGFP [52-66]	GEGEGDATNGKLTLK		1	3	497.255	30.7997	1	168.2	31.8			342485	407772	68612.1	72487.8
	strep-sfGFP [67-73]	FICTTGK	1xCarbamidomethyl [C3]	0	2	413.709	26.3274	41	173.3	226.5	0.2	0	1.77876e+08	2.58313e+08	3.11778e+08	2.51845e+08	300668	208985	21145.5	15822.1
	strep-sfGFP [67-94]	FICTTGKLPVPWPTLVTTLTYGVQCFSR	2xCarbamidomethyl [C3; C25]	1	3	1081.56	77.8172	8	221.8	160.3	11.6	6.2	526529	715564	686355	286720	32101.2		17233.5
	strep-sfGFP [74-94]	LPVPWPTLVTTLTYGVQCFSR	1xCarbamidomethyl [C18]	0	3	812.432	81.9877	2	72.4	127.6			84421.9	135076	188061
	strep-sfGFP [95-100]	YPDHMK		0	2	395.682	22.2664	13	165.1	134.8	0.1		27019410	47038668	34744832	24392940	29317.5	24591.6
	strep-sfGFP [95-100]	YPDHMK	1xOxidation [M5]	0	2	403.678	18.7023	4	115.5	284.1	0.4	0.1	20859982	22490456	58906600	48146428	79903.2	58752.7	10077.1
	strep-sfGFP [95-101]	YPDHMKR	1xOxidation [M5]	1	3	321.488	17.9437	3	132.3	67.7			397069	621070	290845	222265
	strep-sfGFP [101-106]	RHDFFK		1	2	425.222	26.7834	1	243.7	156	0.3	0	56722540	56423668	38391596	34155484	125511	44965.6	10453.3
	strep-sfGFP [107-117]	SAMPEGYVQER		0	2	633.792	35.8459	28	223.1	76.8	0.1		2.14792e+08	2.4626e+08	97405448	6.43808e+07	99488.9	77953.6
	strep-sfGFP [107-117]	SAMPEGYVQER	1xOxidation [M3]	0	2	641.79	31.1488	63	267	132.8	0.2	0	6.32133e+08	7.28661e+08	3.89816e+08	292212425	440748	368694	60287	61524.1
	strep-sfGFP [118-128]	TISFKDDGTYK		1	2	637.816	34.6241	30	339.2	60.6	0.1	0	2.25424e+08	2.6334e+08	5.11326e+07	3.70476e+07	135825	75997	8648.98	6564.83
	strep-sfGFP [123-128]	DDGTYK		0	1	698.298	18.7616	5	108.9	91.1			1.64697e+06	1.90717e+06	489917	4.48473e+06
	strep-sfGFP [131-143]	AEVKFEGDTLVNR		1	2	739.387	39.5974	4	199.1	0.9			9.85856e+06	1.16929e+07	75479	34626.6
	strep-sfGFP [135-143]	FEGDTLVNR		0	2	525.765	36.6213	79	265.5	134.2	0.3	0	1.62013e+09	1.88233e+09	9.89157e+08	7.87811e+08	2.53815e+06	1.27589e+06	257866	169080
	strep-sfGFP [148-161]	GIDFKEDGNILGHK		1	2	771.898	42.0313	99	298.5	101.2	0.2	0	1.13295e+09	1.27055e+09	4.32316e+08	3.82753e+08	1.31075e+06	759281	193703	95893.4
	strep-sfGFP [153-161]	EDGNILGHK		0	2	491.751	26.63	42	241.1	158.7	0.2	0	3.37409e+08	3.95108e+08	2.58692e+08	2.23448e+08	260141	210871	28437.4	21938.6
	strep-sfGFP [162-177]	LEYNFNSHNVYITADK		0	3	643.313	46.9076	77	295.5	103.9	0.5	0.2	1.23183e+09	1.37899e+09	5.09195e+08	4.12293e+08	3.50937e+06	1.39571e+06	923977	543219
	strep-sfGFP [162-179]	LEYNFNSHNVYITADKQK		1	3	728.697	42.1036	6	178.8	21.2			1.12999e+07	1.4287e+07	1.63312e+06	1.38364e+06
	strep-sfGFP [188-230]	IRHNVEDGSVQLADHYQQNTPIGDGPVLLPDNHYLSTQSVLSK		1	4	1189.6	52.4214	2	116.8	277.1	3.2	2.9	6.1093e+06	6062328	16324710	12763619	276199	103218	145739	156781
	strep-sfGFP [190-230]	HNVEDGSVQLADHYQQNTPIGDGPVLLPDNHYLSTQSVLSK		0	4	1122.3	54.1364	27	285.3	112.1	1	1.6	4.23573e+08	4.64659e+08	2.03386e+08	1.49318e+08	2.2315e+06	1.04711e+06	3.86292e+06	1.55935e+06
	strep-sfGFP [236-259]	RDHMVLLEFVTAAGITHGMDELYK		1	4	687.348	66.533	3	67.7	310.6	14.5	7.2	94301.5	165039	652768	502578	26821.4		13217.9
	strep-sfGFP [236-259]	RDHMVLLEFVTAAGITHGMDELYK	1xOxidation [M]	1	4	691.347	62.7921	3	35.6	348.4	7.1	8.9	226416	245997	2959037	1.8035e+06	74200.6	29498.8	91039.4	38371.8
	strep-sfGFP [236-259]	RDHMVLLEFVTAAGITHGMDELYK	2xOxidation [M4; M19]	1	4	695.346	57.01	8	16.2	367.4	9.6	6.8	166344	158126	4072065	3315823	152867	60294.3	113203	40500
	strep-sfGFP [237-259]	DHMVLLEFVTAAGITHGMDELYK		0	3	864.094	71.3346	8	184.3	206.2	4.8	4.8	954285	1.43206e+06	1.54647e+06	1.10656e+06	56255.9	16306.3	47254.7	19288.1
	strep-sfGFP [237-259]	DHMVLLEFVTAAGITHGMDELYK	1xOxidation [M]	0	3	869.426	67.3282	15	138.7	247.9	7.4	6	1.73341e+06	2.41867e+06	4.31368e+06	3.10591e+06	200694	59012.9	108580	72814.1
	strep-sfGFP [237-259]	DHMVLLEFVTAAGITHGMDELYK	2xOxidation [M3; M18]	0	3	874.758	61.7027	8	101.1	281.2	10.9	6.7	1.95449e+06	2.45489e+06	6880818	5.39621e+06	383466	146312	201259	105588
FALSE	C4ZUJ5	Elongation factor G [OS=Escherichia coli BW2952]	71	36	36	77.5	5.38	385	190.6	128.6	59.2	21.7	1.45108e+08	1.71101e+08	1.19012e+08	9.49374e+07	4.70656e+07	5.0878e+07	1.82468e+07	1.7574e+07
	Positions in Master Proteins	Sequence	Modifications	# Missed Cleavages	PSM Charge (by Search Engine): Sequest HT	PSM m/z [Da] (by Search Engine): Sequest HT	PSM RT [min] (by Search Engine): Sequest HT	# PSMs	Abundances (Grouped): 1	Abundances (Grouped): 2	Abundances (Grouped): 3	Abundances (Grouped): 4	Abundance: F5: Sample, 1	Abundance: F6: Sample, 1	Abundance: F7: Sample, 2	Abundance: F8: Sample, 2	Abundance: F9: Sample, 3	Abundance: F10: Sample, 3	Abundance: F11: Sample, 4	Abundance: F12: Sample, 4
	C4ZUJ5 [105-128]	VLDGAVMVYCAVGGVQPQSETVWR	1xCarbamidomethyl [C10]	0	3	874.434	63.2163	1	193.4	59.5	47.1		264145	409380	110028	93190.9		80080.8
	C4ZUJ5 [105-128]	VLDGAVMVYCAVGGVQPQSETVWR	1xOxidation [M7]; 1xCarbamidomethyl [C10]	0	3	879.765	57.5229	1	161.6	92.4	46		201184	213176	139091	100765	71084.4	48754.9
	C4ZUJ5 [12-23]	NIGISAHIDAGK		0	2	598.325	35.1068	10	192.9	142	48.7	16.4	6571832	6.97438e+06	5.68232e+06	4.3719e+06	1.65238e+06	1.766e+06	553617	599480
	C4ZUJ5 [147-153]	MGANFLK	1xOxidation [M1]	0	2	398.705	33.3963	3	180.5	138.2	62.7	18.7	1.31562e+06	1592028	1.23594e+06	993773	507218	498410	149744
	C4ZUJ5 [154-159]	VVNQIK		0	2	350.721	21.3285	9	77.4	217.6	82.5	22.5	566992	771662	2.01912e+06	1.71307e+06	680434	729999	159123	233034
	C4ZUJ5 [162-187]	LGANPVPLQLAIGAEEHFTGVVDLVK		0	3	896.497	73.9932	6	188.5	115.3	57.7	38.5	2810886	6.07492e+06	2.99231e+06	2.13535e+06	1.18865e+06	1.34405e+06	1.0788e+06	661816
	C4ZUJ5 [237-249]	YLGGEELTEAEIK		0	2	726.366	46.0512	7	186.4	132.8	60	20.8	7.73862e+06	8597216	6416378	5.2656e+06	2522298	2.73385e+06	930756	886687
	C4ZUJ5 [256-271]	VLNNEIILVTCGSAFK	1xCarbamidomethyl [C11]	0	2	889.48	57.9712	10	207	118.6	56.6	17.8	3.05482e+06	3.12929e+06	1.98648e+06	1.57921e+06	765653	934983	283573	249942
	C4ZUJ5 [30-39]	ILFYTGVNHK		0	2	596.33	41.2021	11	200	121.6	58.9	19.5	5270443	6.05686e+06	4.13267e+06	2.85594e+06	1.66283e+06	1668117	535660	567321
	C4ZUJ5 [310-323]	HASDDEPFSALAFK		0	2	767.862	50.5577	25	188.2	129.9	59.8	22.2	3.69267e+06	4.32096e+06	3.10509e+06	2.44764e+06	1.18368e+06	1.36069e+06	508449	435175
	C4ZUJ5 [324-337]	IATDPFVGNLTFFR		0	2	799.422	65.5679	9	213.7	108.3	54.3	23.7	4249465	4692257	2.52249e+06	2.03014e+06	1.11459e+06	1.1544e+06	499925	489263
	C4ZUJ5 [338-354]	VYSGVVNSGDTVLNSVK		0	2	869.456	47.6118	11	211.2	121.7	49.6	17.5	8.32422e+06	9.88679e+06	5.81215e+06	4.70609e+06	2.04126e+06	2.22089e+06	763175	743176
	C4ZUJ5 [363-370]	IVQMHANK		0	2	470.754	21.0273	1	132.1	163	81.1	23.9	554622	880876	893490	832167	363224	506379	123756	128721
	C4ZUJ5 [363-370]	IVQMHANK	1xOxidation [M4]	0	2	478.753	17.1237	2	54.6	210.3	105	30.1	165221	189341	761662	609229	342406	337494	86772.4	109602
	C4ZUJ5 [379-389]	AGDIAAAIGLK		0	2	500.296	48.4801	8	193.6	121.3	64.8	20.3	7184460	8024735	4697131	4813043	2.61354e+06	2.47179e+06	815742	775828
	C4ZUJ5 [390-408]	DVTTGDTLCDPDAPIILER	1xCarbamidomethyl [C9]	0	2	1051.01	54.2583	12	176.8	147.3	56.8	19.2	2.33732e+06	2.60656e+06	2.28233e+06	1.85205e+06	709747	885570	262104	272930
	C4ZUJ5 [40-59]	IGEVHDGAATMDWMEQEQER		0	3	778.002	47.5976	6	259.5	71.8	49.8	19	1.02007e+06	1.35192e+06	362406	291312	207577	244503	81039.6	90798.5
	C4ZUJ5 [40-59]	IGEVHDGAATMDWMEQEQER	1xOxidation [M]	0	3	783.336	41.1254	7	195.4	127.2	56.3	21.1	578102	769680	490530	384177	176426	209194	72786.9	71314.5
	C4ZUJ5 [40-59]	IGEVHDGAATMDWMEQEQER	2xOxidation [M11; M14]	0	3	788.667	37.0899	4	186.5	123.4	68.6	21.4	1237028	1.51715e+06	1.03852e+06	791332	500729	507592	158218	155653
	C4ZUJ5 [409-423]	MEFPEPVISIAVEPK		0	2	843.446	60.8606	6	236.3	91.9	52.5	19.3	2364753	3.21418e+06	1.34061e+06	857634	566751	662101	223093	227611
	C4ZUJ5 [409-423]	MEFPEPVISIAVEPK	1xOxidation [M1]	0	2	851.441	56.2264	8	188.9	135.1	55.5	20.5	2832008	3.19228e+06	2.50349e+06	1.84634e+06	825778	945711	300078	353142
	C4ZUJ5 [431-437]	MGLALGR		0	2	359.208	38.4588	1	225.4	84.6	66.5	23.5	1.21313e+06	1.51998e+06	639720	405484	380128	421733	148617	135304
	C4ZUJ5 [431-437]	MGLALGR	1xOxidation [M1]	0	2	367.206	32.5005	3	189.7	131.4	59.1	19.8	1.26287e+06	1.42799e+06	1.03049e+06	838664	422721	413837	137851	142579
	C4ZUJ5 [447-472]	VWTDEESNQTIIAGMGELHLDIIVDR		0	3	985.49	67.9067	1	167.3	47	70.3	115.5	35603.4	123227	16186.7	21362.3	22528.4	34356.9	47986.2	43609.3
	C4ZUJ5 [475-491]	REFNVEANVGKPQVAYR		1	4	495.014	38.0212	17	202	117.2	57.7	23.1	4.47121e+06	5.54962e+06	3.41047e+06	2.44966e+06	1.35028e+06	1.49637e+06	561338	576852
	C4ZUJ5 [476-491]	EFNVEANVGKPQVAYR		0	3	607.648	41.8333	9	200.6	126	55.3	18.1	4.41245e+06	5.24102e+06	3.35792e+06	2.71789e+06	1.27465e+06	1.37863e+06	405738	461421
	C4ZUJ5 [498-504]	VTDVEGK		0	2	374.197	19.8429	2	49.5	230.4	94.9	25.1	266627	366421	1.4911e+06	1.41862e+06	625747	573838	133758	187292
	C4ZUJ5 [513-532]	GQYGHVVIDMYPLEPGSNPK		0	3	734.361	51.2609	7	234.5	85.5	54.4	25.7	2.22768e+06	2800766	1015016	816619	486044	691270	289116	258465
	C4ZUJ5 [513-532]	GQYGHVVIDMYPLEPGSNPK	1xOxidation [M10]	0	3	739.692	45.495	12	189.1	137.6	53.9	19.5	3638823	3.80212e+06	3229189	2.26935e+06	1.01594e+06	1.10522e+06	388882	378329
	C4ZUJ5 [533-541]	GYEFINDIK		0	2	549.778	48.5889	13	179.8	140.7	58.2	21.3	5849424	5938419	4866993	4366905	1.89723e+06	1.91716e+06	734380	666766
	C4ZUJ5 [542-555]	GGVIPGEYIPAVDK		0	2	707.883	49.6017	12	189.1	124.3	62.6	24.1	2.98937e+06	3262341	2329177	1.80865e+06	968869	1.10155e+06	407786	388151
	C4ZUJ5 [556-562]	GIQEQLK		0	2	408.235	28.645	4	169.8	155	57.3	17.9	2.74214e+06	3.769e+06	3265534	2639816	1.10783e+06	1.06272e+06	324503	353588
	C4ZUJ5 [563-577]	AGPLAGYPVVDMGIR		0	2	758.403	55.9871	7	223.7	100.7	54.3	21.3	1.9439e+06	2.43543e+06	1073624	892868	521873	535053	218052	196365
	C4ZUJ5 [563-577]	AGPLAGYPVVDMGIR	1xOxidation [M12]	0	2	766.401	49.8749	9	180.3	137.7	59.9	22	2.16456e+06	2.22807e+06	1832206	1535805	710314	750161	275482	261313
	C4ZUJ5 [578-594]	LHFGSYHDVDSSELAFK		0	3	651.311	47.097	24	195.2	132.1	50	22.7	6.56588e+06	8.01376e+06	5.4567e+06	4.41381e+06	1.8021e+06	1.91621e+06	866637	823745
	C4ZUJ5 [595-602]	LAASIAFK		0	2	410.751	40.3435	5	199.5	123.6	57.6	19.3	5.71605e+06	6.69557e+06	4.23264e+06	3.47389e+06	1.84212e+06	1.73345e+06	572346	625281
	C4ZUJ5 [60-77]	GITITSAATTAFWSGMAK		0	2	907.462	63.4146	9	236.7	83.7	54.4	25.2	1.09097e+06	1.4284e+06	518789	375935	270516	304412	169855	103719
	C4ZUJ5 [60-77]	GITITSAATTAFWSGMAK	1xOxidation [M16]	0	3	610.642	57.7093	8	182.9	126.2	66	24.9	1.91654e+06	1.9619e+06	1.52567e+06	1.17325e+06	641961	762024	294952	236081
	C4ZUJ5 [608-618]	AKPVLLEPIMK		0	2	619.88	44.6684	8	230.6	113.2	43.6	12.6	1.96974e+06	2.28963e+06	1.14301e+06	950831	383724	420025	127792	104616
	C4ZUJ5 [608-618]	AKPVLLEPIMK	1xOxidation [M10]	0	3	418.921	38.6123	7	175.3	135.7	68.6	20.4	2.96605e+06	3.53241e+06	2.75339e+06	2.28106e+06	1.18209e+06	1.35581e+06	295974	478591
	C4ZUJ5 [619-637]	VEVETPEENTGDVIGDLSR		0	2	1030	51.277	15	188.7	121.9	73.2	16.2	3.59889e+06	4.27146e+06	2.76936e+06	2.31805e+06	1.69952e+06	1.3605e+06	381799	298470
	C4ZUJ5 [644-653]	GQESEVTGVK		0	2	517.261	24.9176	1	94.3	201.7	78.3	25.7	1818482	2.86868e+06	5.35244e+06	4.4651e+06	1.90932e+06	1.88768e+06	572989	674778
	C4ZUJ5 [654-671]	IHAEVPLSEMFGYATQLR		0	3	688.02	62.7907	10	246.3	89.7	43.8	20.1	4.81775e+06	5.14105e+06	2.08657e+06	1.57542e+06	823628	953304	448994	369110
	C4ZUJ5 [654-671]	IHAEVPLSEMFGYATQLR	1xOxidation [M10]	0	3	693.351	51.5842	9	173.2	140.1	61.4	25.3	1.97113e+06	2.40212e+06	1.89576e+06	1634870	750376	793617	329329	307334
	C4ZUJ5 [678-686]	ASYTMEFLK		0	2	545.268	49.6092	4	208.7	112.7	57.4	21.2	1.98217e+06	2.17958e+06	1.23865e+06	1.01766e+06	552414	591530	200324	222550
	C4ZUJ5 [678-686]	ASYTMEFLK	1xOxidation [M5]	0	2	553.265	43.2118	4	185.6	134.9	59.9	19.6	3.69921e+06	3.90624e+06	3.09282e+06	2466149	1.25089e+06	1.20431e+06	392221	408957
	C4ZUJ5 [687-702]	YDEAPSNVAQAVIEAR		0	2	866.929	51.3891	13	199.5	115.7	63.5	21.2	6.51646e+06	7530129	4.5351e+06	3.64087e+06	1.99902e+06	2.48565e+06	771040	719463
	C4ZUJ5 [84-101]	INIIDTPGHVDFTIEVER		0	3	690.028	55.7653	14	186.4	111	63.7	38.9	4.9265e+06	5.94983e+06	4.32888e+06	2398850	1.47748e+06	2.31705e+06	1.16266e+06	1.09981e+06
FALSE	P0AG67	Small ribosomal subunit protein bS1 [OS=Escherichia coli K-12]	65	36	36	61.1	4.98	264	31.2	171.2	102.6	95	1.23499e+07	1.32466e+07	7.81504e+07	6.3092e+07	4.01315e+07	4.41475e+07	3.88339e+07	3.91343e+07
	Positions in Master Proteins	Sequence	Modifications	# Missed Cleavages	PSM Charge (by Search Engine): Sequest HT	PSM m/z [Da] (by Search Engine): Sequest HT	PSM RT [min] (by Search Engine): Sequest HT	# PSMs	Abundances (Grouped): 1	Abundances (Grouped): 2	Abundances (Grouped): 3	Abundances (Grouped): 4	Abundance: F5: Sample, 1	Abundance: F6: Sample, 1	Abundance: F7: Sample, 2	Abundance: F8: Sample, 2	Abundance: F9: Sample, 3	Abundance: F10: Sample, 3	Abundance: F11: Sample, 4	Abundance: F12: Sample, 4
	P0AG67 [1-14]	MTESFAQLFEESLK		0	2	830.401	67.8855	5	23.3	157.4	109.1	110.3	31259.8	33798.4	244697	196956	152855	151514	160302	147637
	P0AG67 [1-14]	MTESFAQLFEESLK	1xOxidation [M1]	0	2	838.398	66.7639	6	14.5	178.2	113.1	94.2	34219.1	47498.4	568806	429594	304471	323163	262454	260095
	P0AG67 [101-115]	AYEDAETVTGVINGK		0	2	783.885	44.1159	9	25.8	172	115.3	87	345474	378127	2.57721e+06	2.2495e+06	1.59273e+06	1.63524e+06	1.15622e+06	1.2821e+06
	P0AG67 [118-128]	GGFTVELNGIR		0	2	581.813	50.2843	9	26.7	146.9	125.1	101.3	521686	515624	3.14747e+06	2588281	2.26586e+06	2.60968e+06	1.96567e+06	1.97195e+06
	P0AG67 [129-142]	AFLPGSLVDVRPVR		0	3	509.3	52.4081	12	31.4	169.6	105.7	93.3	599852	752131	3.91288e+06	3.36888e+06	2.11649e+06	2.4214e+06	1.94682e+06	2.05202e+06
	P0AG67 [15-25]	EIETRPGSIVR		0	3	419.57	30.6699	8	31	195.5	99.7	73.8	234567	308985	1873443	1539566	858166	875004	572420	718883
	P0AG67 [164-170]	NNVVVSR		0	2	394.225	22.616	5	9.9	199.2	111	79.9	61400.4	88574.8	1.58969e+06	1.37905e+06	839134	810844	541198	650990
	P0AG67 [171-196]	RAVIESENSAERDQLLENLQEGMEVK		2	4	747.623	53.3606	2	35.9	124.7	101.3	138.1	113987	131658	484055	374401	322787	370450	471037	472083
	P0AG67 [171-196]	RAVIESENSAERDQLLENLQEGMEVK	1xOxidation [M23]	2	4	751.622	47.0858	5	32.5	165	97.8	104.7	152316	178793	913821	767580	465028	529932	515079	548356
	P0AG67 [172-182]	AVIESENSAER		0	2	602.793	25.6115	4	10.6	231.1	93.8	64.4	28499.2	52903.2	987402	722376	332914	352734	212871	260515
	P0AG67 [183-196]	DQLLENLQEGMEVK		0	2	823.41	56.6483	4	25.9	183.6	112.3	78.2	45718.1	50479.2	382409	303118	211566	204982	160632	131111
	P0AG67 [183-196]	DQLLENLQEGMEVK	1xOxidation [M11]	0	2	831.406	47.964	5	24	197.4	99.6	79	56581.7	54545.2	483815	429852	227881	232416	188988	176287
	P0AG67 [2-14]	TESFAQLFEESLK		0	2	764.88	67.2026	6	54.8	155.4	104.2	85.7	332620	417272	1309454	853235	710332	707021	585600	579973
	P0AG67 [228-244]	VKHPSEIVNVGDEITVK		1	3	622.012	40.5512	10	17.9	200.1	87.2	94.8	405600	452331	5.35063e+06	4.28479e+06	2.15259e+06	2023139	2.18343e+06	2.35635e+06
	P0AG67 [230-244]	HPSEIVNVGDEITVK		0	3	546.289	42.948	13	26.3	182.4	106.1	85.2	322345	368498	2.55664e+06	2.23587e+06	1.43131e+06	1351369	1093239	1.13971e+06
	P0AG67 [26-43]	GVVVAIDKDVVLVDAGLK		1	3	604.028	57.7774	16	25.2	78.2	94.3	202.3	347502	470013	1.57043e+06	1.00413e+06	1.12605e+06	2.03595e+06	3.88649e+06	2.71339e+06
	P0AG67 [261-272]	QLGEDPWVAIAK		0	2	663.855	52.798	6	30.9	156.6	115.6	96.9	478209	484611	2.88159e+06	2.06258e+06	1.61132e+06	2.01103e+06	1.44329e+06	1.57887e+06
	P0AG67 [321-339]	VVNVGDVVEVMVLDIDEER		0	2	1065.05	80.8359	14	49	164	87.9	99.1	366364	416125	1.45321e+06	1.17737e+06	712893	689634	882655	707482
	P0AG67 [321-339]	VVNVGDVVEVMVLDIDEER	1xOxidation [M11]	0	3	715.697	64.9489	4	45.9	130.6	112.8	110.7	96321.9	97601.3	300712	252895	233758	242452	226904	240822
	P0AG67 [34-43]	DVVLVDAGLK		0	2	514.804	46.07	4	22.9	193.1	84			61296.2	562588	474863	250160	201864
	P0AG67 [342-347]	ISLGLK		0	2	315.713	38.4941	5	34.1	187.8	97.4	80.7	231094	308954	1559565	1.39254e+06	775448	752679	605305	662934
	P0AG67 [351-363]	ANPWQQFAETHNK		0	3	524.252	45.1647	2	38.9	175.5	103.3	82.2	344615	380894	1.89533e+06	1.40694e+06	997639	926665	712242	822250
	P0AG67 [411-426]	KGDEIAAVVLQVDAER		1	3	571.645	52.6902	13	24.4	163.1	116.3	96.3	542950	604893	4.05061e+06	3.63354e+06	2.47403e+06	3.02261e+06	2.24451e+06	2.28341e+06
	P0AG67 [411-428]	KGDEIAAVVLQVDAERER		2	3	666.69	50.1988	5	22.5	107.9	94.8	174.9	154990	185130	929788	712575	698942	731653	1.32844e+06	1.30969e+06
	P0AG67 [412-426]	GDEIAAVVLQVDAER		0	2	792.915	58.2459	8	33.2	167.7	102	97.2	100625	125259	621215	517470	295217	402991	325656	331519
	P0AG67 [412-428]	GDEIAAVVLQVDAERER		1	3	623.994	54.7864	2	32.6	152.9	87.8	126.7	37533.4	30317	169452	147769	78635.3	105093	131620	130560
	P0AG67 [435-449]	QLAEDPFNNWVALNK		0	2	879.944	59.9095	8	39.1	157.7	108.9	94.3	226105	268912	1.15604e+06	855588	636762	740823	597922	591886
	P0AG67 [44-54]	SESAIPAEQFK		0	2	603.803	37.5534	5	33.8	181	105.6	79.5	1.39882e+06	1.5191e+06	8807768	6909068	4.40183e+06	4.70829e+06	3.26741e+06	3.59355e+06
	P0AG67 [451-457]	GAIVTGK		0	2	323.199	21.1921	2	5.6	224.1	103.5	66.8	9050.81	16912.1	525592	468215	253620	206927	134617	162265
	P0AG67 [458-464]	VTAVDAK		0	2	352.203	19.9906	6	6.5	203.3	109.2	81	45952.5	63103.7	1742511	1.63582e+06	902585	910515	598632	755553
	P0AG67 [465-479]	GATVELADGVEGYLR		0	2	775.396	54.8946	10	32.9	167.2	105.9	94.1	1.12794e+06	1.20679e+06	6.26346e+06	5.62684e+06	3.48772e+06	4.05207e+06	3.35099e+06	3.32866e+06
	P0AG67 [486-504]	DRVEDATLVLSVGDEVEAK		1	2	1023.02	53.4821	14	44.2	134.7	97.1	124	951378	817630	2.90471e+06	2.48513e+06	1.61441e+06	2.32389e+06	2.44057e+06	2.50425e+06
	P0AG67 [505-510]	FTGVDR		0	2	347.68	25.2456	4	12.8	239.1	88.9	59.1	75903.8	138353	2.22846e+06	1.6348e+06	751050	670995	436513	510674
	P0AG67 [514-520]	AISLSVR		0	2	373.232	36.7537	8	32.2	186.8	98.1	82.9	492874	549787	3.49468e+06	2.60286e+06	1.61166e+06	1.55659e+06	1.39785e+06	1283050
	P0AG67 [521-536]	AKDEADEKDAIATVNK		2	3	573.292	28.0656	5	48.9	78	150.2	122.9	459732	459369	798664	671566	1.37575e+06	1.44805e+06	1.09097e+06	1.22145e+06
	P0AG67 [523-536]	DEADEKDAIATVNK		1	3	506.914	32.0216	5	8.3	305.3	62.2	24.2	36866.1	28461.8	1.354e+06	1.05044e+06	237859	248307	91294.5	98113.3
	P0AG67 [529-536]	DAIATVNK		0	2	416.231	25.5704	1	3.7	319.3	52.7	24.3	18103	37611.7	2.47467e+06	2.02201e+06	379461	358806	151916	189956
	P0AG67 [537-552]	QEDANFSNNAMAEAFK		0	2	893.891	49.3479	5	25.2	207.6	99.4	67.8	84255.1	109259	871060	719733	379097	379012	269045	248779
	P0AG67 [55-86]	NAQGELEIQVGDEVDVALDAVEDGFGETLLSR		0	3	1130.22	88.9116	8	218.6	129.2	22.9	29.3	1.24592e+06	797831	919439	377696	148172	73585.7	187033	95171.3
	P0AG67 [91-100]	RHEAWITLEK		1	3	428.236	37.3501	1	22.3	193.9	76.7	107	190671	237133	2232446	1526571	713337	748097	1.01603e+06	1.02197e+06
FALSE	C4ZRR2	Elongation factor Ts [OS=Escherichia coli BW2952]	78	25	25	30.4	5.29	203	264.1	83.6	38.3	14	2.75164e+08	3.23117e+08	1.05468e+08	8.44e+07	4.29261e+07	4.34844e+07	1.51087e+07	1.6566e+07
	Positions in Master Proteins	Sequence	Modifications	# Missed Cleavages	PSM Charge (by Search Engine): Sequest HT	PSM m/z [Da] (by Search Engine): Sequest HT	PSM RT [min] (by Search Engine): Sequest HT	# PSMs	Abundances (Grouped): 1	Abundances (Grouped): 2	Abundances (Grouped): 3	Abundances (Grouped): 4	Abundance: F5: Sample, 1	Abundance: F6: Sample, 1	Abundance: F7: Sample, 2	Abundance: F8: Sample, 2	Abundance: F9: Sample, 3	Abundance: F10: Sample, 3	Abundance: F11: Sample, 4	Abundance: F12: Sample, 4
	C4ZRR2 [105-112]	ITDVEVLK		0	2	458.771	38.1299	3	263.3	84.4	38.9	13.4	21122636	27087622	8671390	6.77559e+06	3.50492e+06	3.56861e+06	1155832	1.27825e+06
	C4ZRR2 [126-133]	IGENINIR		0	2	464.763	36.1895	6	275	76.1	35.6	13.3	32445198	36936040	11291464	8121852	4.36733e+06	4.58564e+06	1.6197e+06	1736579
	C4ZRR2 [134-151]	RVAALEGDVLGSYQHGAR		1	3	633.664	41.5929	5	319.9	41.9	15.1	23.1	971730	1.04294e+06	130060	133358	41472.4	54287.2		72745
	C4ZRR2 [135-151]	VAALEGDVLGSYQHGAR		0	2	871.945	44.4918	16	277.1	69.7	38.5	14.7	4.02364e+07	45707841	1.18987e+07	9.77218e+06	5.78966e+06	6.14285e+06	2.14081e+06	2.42154e+06
	C4ZRR2 [152-159]	IGVLVAAK		0	2	385.76	35.7369	5	277.6	74.6	35.3	12.5	1.99969e+07	2.18924e+07	6.08267e+06	5.20538e+06	2.822e+06	2.50776e+06	917135	967509
	C4ZRR2 [16-24]	TGAGMMDCK	1xOxidation [M]; 1xCarbamidomethyl [C8]	0	2	493.691	20.3891	7	98.9	197.2	84.7	19.3	259292	363928	701461	534729	251194	275276	53052.3	67407.7
	C4ZRR2 [16-25]	TGAGMMDCKK	1xCarbamidomethyl [C8]	1	3	366.83	21.8847	2	277.3	65	44.3	13.4	234774	482408	92086.2	67486.7	61442.8	47037	9536.54	27852.9
	C4ZRR2 [160-167]	GADEELVK		0	2	430.721	27.9707	4	227.6	108.5	46.8	17.2	8.28064e+06	12970592	5.54566e+06	4399006	2.14667e+06	2.11497e+06	718587	849774
	C4ZRR2 [168-193]	HIAMHVAASKPEFIKPEDVSAEVVEK		0	4	716.129	42.6329	3	197.4	131.7	49.2	21.7	1298822	1.57765e+06	1.11358e+06	819441	375425	339008	163005	152228
	C4ZRR2 [168-193]	HIAMHVAASKPEFIKPEDVSAEVVEK	1xOxidation [M4]	0	4	720.126	40.1556	3	87.6	235.5	46.1	30.9	803383	873404	2.42955e+06	2088154	464714	418508	286883	303641
	C4ZRR2 [194-209]	EYQVQLDIAMQSGKPK		0	3	612.317	45.749	6	286.3	71.3	31.5	10.9	6.16574e+06	7.15569e+06	1.96477e+06	1.39296e+06	759515	705356	279319	229349
	C4ZRR2 [194-209]	EYQVQLDIAMQSGKPK	1xOxidation [M10]	0	3	617.648	41.6858	10	208.9	133.7	43.2	14.2	5.02816e+06	6.05466e+06	4.21695e+06	2.95448e+06	1.02694e+06	1.26894e+06	358214	392749
	C4ZRR2 [2-10]	AEITASLVK		0	2	466.276	37.8234	5	266.8	82.4	36.4	14.3	1.26712e+06	1.41881e+06	447724	383012	195941	171109	72709.3	71156.2
	C4ZRR2 [222-240]	KFTGEVSLTGQPFVMEPSK		1	3	694.691	50.6656	2	299	50.9	38	12.1	1.24215e+06	1.70659e+06	287518	213464	172840	198217	55221.8	63157.7
	C4ZRR2 [222-240]	KFTGEVSLTGQPFVMEPSK	1xOxidation [M15]	1	3	700.022	47.2319	5	274.6	76	34.5	14.9	3193938	3.59189e+06	1.03126e+06	853336	410145	440464	176704	191670
	C4ZRR2 [223-240]	FTGEVSLTGQPFVMEPSK		0	2	977.49	54.7908	4	292.2	62.6	32.4	12.8	1.21604e+06	1481360	317286	260472	131496	168727	59074.9	58623.3
	C4ZRR2 [223-240]	FTGEVSLTGQPFVMEPSK	1xOxidation [M14]	0	2	985.482	51.3926	6	267.5	76.6	39.1	16.8	2.78932e+06	3.15528e+06	949924	759850	433964	432854	183350	188905
	C4ZRR2 [241-247]	TVGQLLK		0	2	379.742	34.3557	7	271.6	82.4	34.3	11.7	11462927	12483069	3.95054e+06	3.33147e+06	1.5329e+06	1.48438e+06	469449	569724
	C4ZRR2 [248-258]	EHNAEVTGFIR		0	2	636.82	37.0722	16	270.4	73.2	40.6	15.8	1.71215e+07	20215157	5.60348e+06	4.51994e+06	2.64341e+06	2.95732e+06	1.03813e+06	1.13409e+06
	C4ZRR2 [25-42]	KALTEANGDIELAIENMR		1	3	663.342	55.0497	6	304.7	49.8	30.5	15	1.45256e+06	1.82778e+06	282273	251544	146289	181869	87595.6	73430.1
	C4ZRR2 [25-42]	KALTEANGDIELAIENMR	1xOxidation [M17]	1	3	668.675	46.6111	4	241.6	92.7	49	16.7	1.78269e+06	1.28157e+06	655759	512931	283047	331679	83673.8	130699
	C4ZRR2 [259-267]	FEVGEGIEK		0	2	504.256	38.5182	8	240.5	106	41.5	12.1	16458155	19762668	8840019	7.15019e+06	3.08826e+06	3132937	866036	946685
	C4ZRR2 [259-281]	FEVGEGIEKVETDFAAEVAAMSK		1	3	819.731	73.6942	3	275.4		11.8	12.8	2.57731e+06	3.31714e+06			105386	149923	142050	129495
	C4ZRR2 [259-281]	FEVGEGIEKVETDFAAEVAAMSK	1xOxidation [M21]	1	3	825.065	67.2037	3	343.9	6.9	23.8	25.4	2.79539e+06	3.51976e+06	134277	29182.7	198325	238264	230303	233274
	C4ZRR2 [26-42]	ALTEANGDIELAIENMR		0	2	930.462	60.341	11	274.2	74.3	37.3	14.2	3156923	3.56006e+06	1.06942e+06	771117	421525	494630	165240	181980
	C4ZRR2 [26-42]	ALTEANGDIELAIENMR	1xOxidation [M16]	0	2	938.459	51.4335	8	247.3	99.3	34.7	18.7	1.96866e+06	2.34223e+06	937955	792337	397404	228516	173845	151213
	C4ZRR2 [26-43]	ALTEANGDIELAIENMRK		1	3	663.343	56.0857	2	250.8		26.9	22.3	254811	263329			25186.7	30623.4	23025.9
	C4ZRR2 [268-281]	VETDFAAEVAAMSK		0	2	734.854	55.3612	7	248.7	97.5	40.9	12.9	5.80596e+06	6.28345e+06	2.60417e+06	2.15583e+06	923902	1.06923e+06	328797	297984
	C4ZRR2 [268-281]	VETDFAAEVAAMSK	1xOxidation [M12]	0	2	742.85	45.8436	13	253.6	90.7	41.6	14.1	7.6871e+06	9.26701e+06	3422736	2.66031e+06	1.41646e+06	1.3559e+06	483438	452251
	C4ZRR2 [52-63]	KAGNVAADGVIK		1	3	381.556	26.643	9	329.6	21.3	33.7	15.4	7.26719e+06	8338097	532128	476079	783391	809072	331646	397926
	C4ZRR2 [53-63]	AGNVAADGVIK		0	2	507.783	30.9112	6	241	107.1	39.9	12	12140477	14187845	6.44395e+06	5276646	2.23315e+06	2.11245e+06	606076	707132
	C4ZRR2 [86-95]	DAGFQAFADK		0	2	535.252	42.899	2	265.8	82.1	38.4	13.7	20751688	23193332	7358928	6246971	3.29319e+06	3052539	1.08985e+06	1.17578e+06
	C4ZRR2 [96-104]	VLDAAVAGK		0	2	422.251	28.9345	6	263.2	88.3	36.3	12.2	15928164	19775328	6460448	5490675	2.47861e+06	2415398	740443	911171
FALSE	B1XBY6	Large ribosomal subunit protein uL1 [OS=Escherichia coli str. K-12 substr. DH10B]	61	15	15	24.7	9.64	186	53	130.2	92	124.7	3.0311e+07	3.42702e+07	8.99695e+07	6.97486e+07	5.45308e+07	5.74487e+07	7.37965e+07	7.79842e+07
	Positions in Master Proteins	Sequence	Modifications	# Missed Cleavages	PSM Charge (by Search Engine): Sequest HT	PSM m/z [Da] (by Search Engine): Sequest HT	PSM RT [min] (by Search Engine): Sequest HT	# PSMs	Abundances (Grouped): 1	Abundances (Grouped): 2	Abundances (Grouped): 3	Abundances (Grouped): 4	Abundance: F5: Sample, 1	Abundance: F6: Sample, 1	Abundance: F7: Sample, 2	Abundance: F8: Sample, 2	Abundance: F9: Sample, 3	Abundance: F10: Sample, 3	Abundance: F11: Sample, 4	Abundance: F12: Sample, 4
	B1XBY6 [106-122]	KGEMNFDVVIASPDAMR		1	3	627.306	51.8914	13	72.1	69.7	126.6	131.6	525300	643589	640939	492876	931544	1.12048e+06	1.10198e+06	1.02313e+06
	B1XBY6 [106-122]	KGEMNFDVVIASPDAMR	1xOxidation [M]	1	3	632.638	46.9389	17	47.2	121.2	92	139.5	650734	818110	2.07038e+06	1.6969e+06	1.35304e+06	1.49561e+06	2.12573e+06	2.18867e+06
	B1XBY6 [106-122]	KGEMNFDVVIASPDAMR	2xOxidation [M4; M16]	1	3	637.97	42.6574	7	35.8	135.8	87.4	141.1	853218	997663	3939447	3116298	2.23392e+06	2.27517e+06	3.50199e+06	3.78342e+06
	B1XBY6 [107-122]	GEMNFDVVIASPDAMR	2xOxidation [M3; M15]	0	2	892.4	47.389	6
	B1XBY6 [123-134]	VVGQLGQVLGPR		0	2	611.868	44.971	8	46.9	136.3	89.6	127.2	5937032	6.40206e+06	19291188	16679438	11792030	11798416	16068687	17432738
	B1XBY6 [13-19]	EKVDATK		1	2	395.719	16.8927	1	12.6		121	166.3	9422.49	15749.5			119771	113739	180754	142337
	B1XBY6 [135-141]	GLMPNPK		0	2	378.707	31.0212	7	55	148.7	90.7	105.6	256899	301434	868835	650962	435662	482678	481719	592499
	B1XBY6 [135-141]	GLMPNPK	1xOxidation [M3]	0	2	386.705	22.0287	1	17.9	162	98.3	121.8	93123.4	138300	1.13191e+06	931178	643105	603816	696741	855336
	B1XBY6 [142-154]	VGTVTPNVAEAVK		0	2	642.862	38.0226	7	51.5	116.8	98.2	133.4	6.11189e+06	7.20194e+06	17203694	13143479	12072053	13226486	16597785	17771276
	B1XBY6 [168-177]	NGIIHTTIGK		0	3	351.873	31.0448	4	41.6	189.4	87.3	81.7	307042	387536	1.77674e+06	1.38496e+06	833064	627199	592211	773847
	B1XBY6 [20-31]	QYDINEAIALLK		0	2	695.883	62.3669	7	42.9	148.9	98.6	109.6	1.30437e+06	1.42887e+06	5542163	4058330	2.98011e+06	3.31129e+06	3.51133e+06	3.47408e+06
	B1XBY6 [20-37]	QYDINEAIALLKELATAK		1	3	668.705	75.9043	1	78.2	116.1	83.1	122.6	365518	392118	772602	408367	403561	401124	633351	555612
	B1XBY6 [32-37]	ELATAK		0	2	316.684	18.9478	6	9.8	208.4	117.3	64.5	24488.1	34553.9	522271	739312	395570	309342	198752	186194
	B1XBY6 [38-53]	FVESVDVAVNLGIDAR		0	2	852.452	57.6274	47	197.9	65.8	62.8	73.4	3.57809e+06	3.5641e+06	1.36672e+06	1.03176e+06	909693	1.4125e+06	1.46793e+06	1.19624e+06
	B1XBY6 [61-71]	GATVLPHGTGR		0	2	533.294	25.8658	14	51.7	157.2	86.5	104.6	1.61774e+06	1895237	6.17013e+06	4.59626e+06	3.0606e+06	2.80563e+06	3.29529e+06	3.80786e+06
	B1XBY6 [75-88]	VAVFTQGANAEAAK		0	2	688.862	35.2154	7	53.9	137.1	87.6	121.3	5586566	6308452	18228052	12481945	9557045	9732393	12897812	13826133
	B1XBY6 [89-105]	AAGAELVGMEDLADQIK		0	2	865.935	59.0556	10	47.5	117.5	97.7	137.3	2.01544e+06	2.45884e+06	6.3896e+06	4.73595e+06	4.19139e+06	4.99004e+06	6.51982e+06	6.34079e+06
	B1XBY6 [89-105]	AAGAELVGMEDLADQIK	1xOxidation [M9]	0	2	873.935	47.8911	14	39.1	140.5	90.8	129.6	696876	804021	2.80784e+06	2.58153e+06	1.73132e+06	1.74864e+06	2.47688e+06	2.4913e+06
	B1XBY6 [89-106]	AAGAELVGMEDLADQIKK		1	3	620.324	54.653	5	47.3	111	91.5	150.2	377242	369176	977834	785177	666537	783452	1.15323e+06	1.21971e+06
	B1XBY6 [89-106]	AAGAELVGMEDLADQIKK	1xOxidation [M9]	1	3	625.656	43.6923	4	49.1	113.6	97.7	139.6		108470	269170	233832	220793	210699	294465	323061
FALSE	P0A6P5	GTPase Der [OS=Escherichia coli K-12]	69	32	32	55	5.85	167	0.1	343	0.5	56.3	33912.2	71677.5	2.24824e+08	1.75794e+08	657001	140829	3.13662e+07	3.39987e+07
	Positions in Master Proteins	Sequence	Modifications	# Missed Cleavages	PSM Charge (by Search Engine): Sequest HT	PSM m/z [Da] (by Search Engine): Sequest HT	PSM RT [min] (by Search Engine): Sequest HT	# PSMs	Abundances (Grouped): 1	Abundances (Grouped): 2	Abundances (Grouped): 3	Abundances (Grouped): 4	Abundance: F5: Sample, 1	Abundance: F6: Sample, 1	Abundance: F7: Sample, 2	Abundance: F8: Sample, 2	Abundance: F9: Sample, 3	Abundance: F10: Sample, 3	Abundance: F11: Sample, 4	Abundance: F12: Sample, 4
	P0A6P5 [1-15]	MVPVVALVGRPNVGK		0	3	512.642	47.7827	2		149.9		50.1			479544	335633			126562	141987
	P0A6P5 [110-119]	EKPTFLVANK		0	3	382.889	33.8688	7		177.9		22.1			1.19901e+07	10211732			1.30615e+06	1.4487e+06
	P0A6P5 [120-149]	TDGLDPDQAVVDFYSLGLGEIYPIAASHGR		0	3	1059.52	75.3225	4		247.2	4.7	48			1.67411e+06	1.20282e+06	43384	16798.7	302388	251504
	P0A6P5 [16-21]	STLFNR		0	2	369.201	33.5147	1	2.4	344.2	1.7	51.7	33912.2	45763.5	6460065	4886838	26294.5	28212.4	786652	904427
	P0A6P5 [205-215]	LAIVGRPNVGK		0	2	562.35	33.1802	10		170.2		29.8			14938962	9092057			1.94705e+06	2.13481e+06
	P0A6P5 [228-238]	VVVYDMPGTTR		0	2	619.317	40.6958	3		167		33			8480283	6556338			1.35702e+06	1.60276e+06
	P0A6P5 [228-238]	VVVYDMPGTTR	1xOxidation [M6]	0	2	627.314	32.6423	8		174.7		25.3			5.83943e+06	4.66521e+06			718059	798310
	P0A6P5 [239-247]	DSIYIPMER		0	2	562.277	47.1109	4		167.3		32.7			2.75934e+06	2.43543e+06			503027	510318
	P0A6P5 [239-247]	DSIYIPMER	1xOxidation [M7]	0	2	570.274	41.1824	8		171.1		28.9			7.73575e+06	5740925			1.1002e+06	1.14946e+06
	P0A6P5 [25-38]	TRDALVADFPGLTR		1	3	511.279	50.4135	3		155.3		44.7			746608	637319			218979	180518
	P0A6P5 [251-261]	EYVLIDTAGVR		0	2	618.336	47.6132	7		257.2	0.4	42.4			15215023	12635399	20296.4		2269242	2.29947e+06
	P0A6P5 [27-38]	DALVADFPGLTR		0	2	637.839	55.7171	5		254.7	0.3	45			11839903	10336366	14479.3		1.92252e+06	1.98479e+06
	P0A6P5 [278-295]	TLQAIEDANVVMLVIDAR		0	2	986.033	73.4913	6		239.2	16	44.7			1.91493e+06	1593624	117115		323436	329736
	P0A6P5 [278-295]	TLQAIEDANVVMLVIDAR	1xOxidation [M12]	0	2	994.03	68.3844	5		221.1	16.9	62			952296	903666	70823.9		243276	278389
	P0A6P5 [296-314]	EGISDQDLSLLGFILNSGR		0	2	1017.53	77.2332	5		249.2	4.5	46.3			1.2336e+06	926979	31470	11740.7	215346	183651
	P0A6P5 [315-322]	SLVIVVNK		0	2	436.284	39.2708	2		185.6		14.4			8740484	6797106			569282	627186
	P0A6P5 [315-331]	SLVIVVNKWDGLSQEVK		1	3	638.695	54.4774	2		59.6		140.4			138540	126813			297770	328046
	P0A6P5 [323-331]	WDGLSQEVK		0	2	531.267	39.5017	3		186.5		13.5			6260079	4.77821e+06			376074	418174
	P0A6P5 [332-341]	EQVKETLDFR		1	2	632.83	37.0641	2		100					621978	454926
	P0A6P5 [342-349]	LGFIDFAR		0	2	469.759	55.7818	4		251.9	0.5	47.6			8643237	7414897	16857.6		1.5793e+06	1449511
	P0A6P5 [350-369]	VHFISALHGSGVGNLFESVR		0	4	532.284	54.3416	8		252.3	3.1	44.6			11406144	9240335	217046	75195.9	1.92453e+06	1.70812e+06
	P0A6P5 [370-377]	EAYDSSTR		0	2	464.704	21.7298	4		179.1		20.9			2858761	2.24743e+06			268565	326463
	P0A6P5 [370-378]	EAYDSSTRR		1	3	362.172	19.8461	2		163.5		36.5			349503	255912			55621.2	80188.4
	P0A6P5 [379-386]	VGTSMLTR	1xOxidation [M5]	0	2	440.732	25.8088	5		174.2		25.8			6.04647e+06	4.99039e+06			732312	902386
	P0A6P5 [387-401]	IMTMAVEDHQPPLVR		0	3	579.633	43.6894	4		157.6		42.4			1.0618e+06	878745			251875	268144
	P0A6P5 [387-401]	IMTMAVEDHQPPLVR	1xOxidation [M4]	0	3	584.964	38.8372	4		168.8		31.2			4.17173e+06	3296246			653732	719394
	P0A6P5 [387-401]	IMTMAVEDHQPPLVR	2xOxidation [M2; M4]	0	3	590.295	35.7242	4		174.1		25.9			8.22241e+06	6.96294e+06			1.06572e+06	1.19303e+06
	P0A6P5 [409-428]	YAHAGGYNPPIVVIHGNQVK		0	4	534.286	39.9898	5		254.2	0.3	45.5			1.48898e+07	1.1231e+07	26517.1	8880.99	2.08617e+06	2.57149e+06
	P0A6P5 [429-436]	DLPDSYKR		1	3	331.838	28.0135	6		168.2		31.8			5.84919e+06	4232991			869048	1.01639e+06
	P0A6P5 [445-454]	SLDVMGSPIR		0	2	537.784	44.6839	1		167.8		32.2			3636417	3.05804e+06			633120	647123
	P0A6P5 [445-454]	SLDVMGSPIR	1xOxidation [M5]	0	2	545.782	37.4697	5		173.7		26.3			11847142	8962870			1.52054e+06	1.59588e+06
	P0A6P5 [45-50]	AEIEGR		0	2	337.677	20.3368	5		178		22			3768082	3258331			380185	493357
	P0A6P5 [459-467]	EGENPYANK		0	2	511.233	23.8729	3	3.9	265.8		30.3		25914	2.13059e+06	1.46385e+06			176228	229687
	P0A6P5 [459-468]	EGENPYANKR		1	3	393.192	22.0362	4		167.1		32.9			2.46399e+06	1.78564e+06			379470	449139
	P0A6P5 [468-477]	RNTLTPTQMR	1xOxidation [M9]	1	3	411.884	22.4185	1		176.4		23.6			142179	107332			12373.4	22088.6
	P0A6P5 [469-477]	NTLTPTQMR		0	2	531.274	31.4182	3		173.1		26.9			4.78365e+06	3.64652e+06			603505	698514
	P0A6P5 [51-70]	EFICIDTGGIDGTEDGVETR	1xCarbamidomethyl [C4]	0	2	1092.49	52.7611	6		252.5	3.8	43.6			5.29099e+06	4.33386e+06	72717.9		790397	865965
	P0A6P5 [93-104]	AGLMPADEAIAK		0	2	593.81	40.588	3		158.7		41.3			5616255	4189747			1.19727e+06	1333252
	P0A6P5 [93-104]	AGLMPADEAIAK	1xOxidation [M4]	0	2	601.807	35.1436	3		174.2		25.8			13624938	9919679			1.60325e+06	1.8563e+06
FALSE	B1XCM5	Alanine--tRNA ligase [OS=Escherichia coli str. K-12 substr. DH10B]	46	35	35	96	5.81	166	173.9	136.8	58.7	30.6	2.52682e+07	2.9592e+07	2.39609e+07	1.93094e+07	9.19927e+06	9.25476e+06	4.52039e+06	5.11246e+06
	Positions in Master Proteins	Sequence	Modifications	# Missed Cleavages	PSM Charge (by Search Engine): Sequest HT	PSM m/z [Da] (by Search Engine): Sequest HT	PSM RT [min] (by Search Engine): Sequest HT	# PSMs	Abundances (Grouped): 1	Abundances (Grouped): 2	Abundances (Grouped): 3	Abundances (Grouped): 4	Abundance: F5: Sample, 1	Abundance: F6: Sample, 1	Abundance: F7: Sample, 2	Abundance: F8: Sample, 2	Abundance: F9: Sample, 3	Abundance: F10: Sample, 3	Abundance: F11: Sample, 4	Abundance: F12: Sample, 4
	B1XCM5 [244-261]	IAAVLQHVNSNYDIDLFR		0	3	696.701	56.5003	4	151	176.4	53.1	19.5	340594	394893	492456	373123	110532	150525	50167.9	44844.3
	B1XCM5 [351-361]	RQQAQVEQVLK		1	2	663.879	30.1665	3	213.9	115.5	49.1	21.5	594872	702678	391511	311544	148006	148909	58554.5	72024.2
	B1XCM5 [352-361]	QQAQVEQVLK		0	2	585.828	34.5685	2	195.4	130.5	48.8	25.3	428149	462809	331502	266652	107161	115235	52119.9	63651.8
	B1XCM5 [362-369]	TEEEQFAR		0	2	505.233	27.7075	4	123	153.5	86.7	36.8	619833	1.11906e+06	1.13014e+06	955933	777127	443847	150600	412968
	B1XCM5 [374-384]	GLALLDEELAK		0	2	586.332	54.1273	6	181.9	128.8	57.4	31.9	1.60547e+06	1.75821e+06	1.2749e+06	1.11025e+06	474382	592698	296990	292079
	B1XCM5 [385-397]	LSGDTLDGETAFR		0	2	691.333	43.0675	7	189.6	127.3	54.1	29	1.478e+06	1.76229e+06	1.20229e+06	975968	462947	458454	228712	266778
	B1XCM5 [420-433]	VDEAGFEAAMEEQR		0	2	791.347	46.6778	4	178.5	123.7	63	34.8	352353	422684	288863	247497	128976	144064	80816.1	69966.5
	B1XCM5 [460-469]	GYDHLELNGK		0	3	382.525	33.863	4	166.8	150	57.9	25.4	327340	338495	372938	240300	108473	122971	47533.2	54008.1
	B1XCM5 [470-478]	VTALFVDGK		0	2	475.27	41.5233	2	182.2	132.7	56.9	28.2	1.60472e+06	1.81016e+06	1.46854e+06	1.04904e+06	472378	599420	247427	282137
	B1XCM5 [479-513]	AVDAINAGQEAVVVLDQTPFYAESGGQVGDKGELK		1	3	1192.6	63.6794	3	208.5	103	47.5	41	486097	625713	308743	240595	117514	134310	119971	98165.3
	B1XCM5 [49-57]	DVFLGLDKR		1	2	531.801	45.4103	6	171.5	144.9	60.6	23	537774	578234	509786	435433	209109	185408	75828	73496.8
	B1XCM5 [514-526]	GANFSFAVEDTQK		0	2	707.335	45.9426	8	180	136.6	56	27.5	1.27086e+06	1.53504e+06	1.14999e+06	976665	398437	474281	213002	213120
	B1XCM5 [527-536]	YGQAIGHIGK		0	2	522.285	29.3859	6	188.8	127.5	53.6	30.1	460438	537415	376066	299971	146814	136095	72702.2	86371.5
	B1XCM5 [537-543]	LAAGSLK		0	2	330.208	25.7451	1	135.9	174.1	57.6	32.5	228966	346994	401043	325197	120790	118276	60335	75214.6
	B1XCM5 [544-556]	VGDAVQADVDEAR		0	2	672.823	34.0943	6	168.3	146.5	56.8	28.4	687998	774497	702739	574106	251419	241142	114521	132412
	B1XCM5 [544-557]	VGDAVQADVDEARR		1	3	500.919	32.749	6	188.6	127.2	53.7	30.5	800583	928797	629760	536999	244895	246621	125672	155015
	B1XCM5 [576-585]	QVLGTHVSQK		0	3	366.208	23.3763	4	157.1	158.7	56.2	28	429055	588346	526328	489830	186540	172992	81665	98365.8
	B1XCM5 [586-592]	GSLVNDK		0	2	366.698	22.3515	2	78.7	201.2	83.6	36.6	84961.6	114395	260804	243646	107553	101957	41414.6	50738.1
	B1XCM5 [596-610]	FDFSHNEAMKPEEIR	1xOxidation [M9]	0	3	622.618	37.1341	8	192.8	134.5	55	17.7	1.13322e+06	1.39936e+06	1.07831e+06	716234	418246	308013		115657
	B1XCM5 [611-621]	AVEDLVNTQIR		0	2	629.345	43.3454	8	179.8	136.4	53.8	30.1	1.68563e+06	1.80751e+06	1.52811e+06	1.14699e+06	527758	516453	287962	296078
	B1XCM5 [640-648]	GAMALFGEK	1xOxidation [M3]	0	2	470.234	36.9582	4	148.5	108.3	43.2		531414	537107	439792	345041	144021	168104
	B1XCM5 [674-681]	TGDIGLFR		0	2	439.74	44.2972	5	194.3	109.4	57.9	38.5	1.06664e+06	1.28947e+06	734973	593111	328053	371826	246072	219355
	B1XCM5 [682-693]	IISESGTAAGVR		0	2	580.816	29.8604	5	171.7	138.8	56.1	33.3	1.71385e+06	2.02052e+06	1.65086e+06	1.37091e+06	624655	592761	321731	405511
	B1XCM5 [694-713]	RIEAVTGEGAIATVHADSDR		1	3	690.019	38.1433	7	150.9	143.6	66.9	38.6	609959	684551	712664	530307	283520	289128	151215	180395
	B1XCM5 [695-713]	IEAVTGEGAIATVHADSDR		0	3	637.986	40.5811	4	140.8	150.6	69	39.5	226547	258203	286401	233521	99586	141098	67911.4
	B1XCM5 [714-722]	LSEVAHLLK		0	3	337.206	38.4139	5	170.1	146.6	55.1	28.1	928179	1.03275e+06	897538	793519	320794	313409	162678	161200
	B1XCM5 [723-731]	GDSNNLADK		0	2	467.217	20.1695	2	36.9	236.4	92.1	34.6	45359.3	58759.6	348871	313483	123507	134356	40226.4	58185.3
	B1XCM5 [75-86]	HNDLENVGYTAR		0	2	694.832	33.2076	5	189	128.8	57.8	24.4	815028	894182	709563	476983	251938	270794	104116	116431
	B1XCM5 [751-764]	EQAAAQESANLSSK		0	2	717.346	26.3869	5	135.2	163.3	61.5	40	385358	620814	655350	532997	230257	214729	136879	153389
	B1XCM5 [773-784]	LLVSELSGVEPK		0	2	635.867	49.3909	8	164.9	135.5	61	38.7	1.03538e+06	1.00082e+06	904085	773650	375188	377500	234271	243342
	B1XCM5 [788-811]	TMVDDLKNQLGSTIIVLATVVEGK		1	3	848.804	85.5643	1	226.1	66.7	52.5	54.8	164310	210550	62528.3	48081.5	39291.8	47407	52269.5	38824.4
	B1XCM5 [795-811]	NQLGSTIIVLATVVEGK		0	2	871.508	73.908	1	120.8	201	51.2	27	79888	115578	183570	139227	41663.3	39850.9	24820.8	18643.3
	B1XCM5 [812-820]	VSLIAGVSK		0	2	437.274	38.8627	5	166.8	138.7	59.1	35.4	586277	662655	544918	493089	215996	225491	130219	134261
	B1XCM5 [828-842]	AGELIGMVAQQVGGK		0	2	729.394	53.4102	5	172.4	121.7	63.3	42.6	451912	520394	384335	305225	167104	189586	126895	113372
	B1XCM5 [828-842]	AGELIGMVAQQVGGK	1xOxidation [M7]	0	2	737.391	46.579	5	166.2	119	68.9	45.8	370450	436126	313143	264618	159896	173919	114007	107846
	B1XCM5 [843-868]	GGGRPDMAQAGGTDAAALPAALASVK		0	3	785.068	50.1073	3	208.5	96.5	54.6	40.5	454301	498582	235912	205761	121899	127388	90536.6	94308.5
	B1XCM5 [843-868]	GGGRPDMAQAGGTDAAALPAALASVK	1xOxidation [M7]	0	3	790.398	47.4115	2	200.2	121.3	46	32.5	646402	743377	471609	373921	152846	165738	110545	114307
FALSE	B1X6G8	Large ribosomal subunit protein uL2 [OS=Escherichia coli str. K-12 substr. DH10B]	63	17	17	29.8	10.93	158	27.2	210.9	120.2	41.7	1.46919e+07	1.77332e+07	1.40953e+08	1.11569e+08	6.97204e+07	7.32889e+07	2.37935e+07	2.5791e+07
	Positions in Master Proteins	Sequence	Modifications	# Missed Cleavages	PSM Charge (by Search Engine): Sequest HT	PSM m/z [Da] (by Search Engine): Sequest HT	PSM RT [min] (by Search Engine): Sequest HT	# PSMs	Abundances (Grouped): 1	Abundances (Grouped): 2	Abundances (Grouped): 3	Abundances (Grouped): 4	Abundance: F5: Sample, 1	Abundance: F6: Sample, 1	Abundance: F7: Sample, 2	Abundance: F8: Sample, 2	Abundance: F9: Sample, 3	Abundance: F10: Sample, 3	Abundance: F11: Sample, 4	Abundance: F12: Sample, 4
	B1X6G8 [103-108]	YILAPK		0	2	352.721	33.516	4	28.3	218.2	112.6	40.8	535674	667816	4.96332e+06	4.28045e+06	2406146	2.3518e+06	816932	909369
	B1X6G8 [112-133]	AGDQIQSGVDAAIKPGNTLPMR		0	3	747.055	46.2434	6	35.7	190.5	125.9	47.9	725186	863532	4.75512e+06	3.74145e+06	2.68386e+06	2.89785e+06	1.0691e+06	1.05055e+06
	B1X6G8 [112-133]	AGDQIQSGVDAAIKPGNTLPMR	1xOxidation [M21]	0	3	752.386	42.8125	9	27.9	201.9	127.4	42.8	875912	966560	7405627	5963330	4.08961e+06	4299759	1.31561e+06	1510360
	B1X6G8 [134-150]	NIPVGSTVHNVEMKPGK		0	3	602.989	34.0438	7	34.3	209.6	115.7	40.3	633198	777404	4.86048e+06	3.777e+06	2.41829e+06	2.31237e+06	758111	895497
	B1X6G8 [134-150]	NIPVGSTVHNVEMKPGK	1xOxidation [M13]	0	3	608.32	30.6323	8	25.3	231.3	107.3	36.1	873846	965064	8868384	7929319	3.84858e+06	3933275	1.19949e+06	1426677
	B1X6G8 [157-167]	SAGTYVQIVAR		0	2	582.822	40.6192	11	28.7	186.9	136.6	47.7	2.24332e+06	2.68168e+06	18309202	13903921	11281627	12044451	3.88143e+06	4275147
	B1X6G8 [168-175]	DGAYVTLR		0	2	447.738	36.6308	9	32.3	201.4	121.6	44.6	1.04266e+06	1.12336e+06	8.14303e+06	5.58583e+06	4.0392e+06	4.10472e+06	1.52914e+06	1.45861e+06
	B1X6G8 [184-189]	VEADCR	1xCarbamidomethyl [C5]	0	2	375.165	18.3784	4	4.6	265.1	111.6	18.7		15515.9	779141	1.02626e+06	395519	357897	72799.9	54587.9
	B1X6G8 [19-26]	VVNPELHK		0	2	468.269	24.0059	7	27.3	228.3	105.5	39	462952	784507	5.73142e+06	4437425	2.18108e+06	2.49094e+06	904365	819325
	B1X6G8 [190-203]	ATLGEVGNAEHMLR		0	3	499.921	43.1522	14	34.2	219.4	108.7	37.7	991705	1.12063e+06	7.4985e+06	6.0829e+06	3.40338e+06	3.29244e+06	1.10357e+06	1.21995e+06
	B1X6G8 [190-203]	ATLGEVGNAEHMLR	1xOxidation [M12]	0	3	505.255	37.1047	6	20.1	220.9	122	36.9	525707	654269	7.22135e+06	5.72511e+06	3.49401e+06	3.61118e+06	1.09728e+06	1.05166e+06
	B1X6G8 [215-221]	GVRPTVR		0	2	392.743	20.1929	6	11.6	242.6	117.1	28.7	189663	281571	4929912	4778764	2380720	2.30332e+06	499999	661504
	B1X6G8 [222-238]	GTAMNPVDHPHGGGEGR		0	4	422.942	23.8879	8	35.2	208	114.2	42.6	552023	585098	4.2553e+06	2.64757e+06	1.79316e+06	1.89519e+06	611225	774580
	B1X6G8 [222-238]	GTAMNPVDHPHGGGEGR	1xOxidation [M4]	0	3	568.921	20.6281	8	16.9	223.3	120.4	39.3	282981	457428	5111212	4399103	2.53732e+06	2.57626e+06	727990	958633
	B1X6G8 [243-253]	HPVTPWGVQTK		0	3	417.227	35.2829	10	28.9	231.8	104.6	34.6	628833	688748	6.58307e+06	4.22237e+06	2.3652e+06	2.39452e+06	761492	811955
	B1X6G8 [27-36]	GKPFAPLLEK		0	3	367.222	40.7562	7	29.8	212.5	115.8	41.9	1.49979e+06	1765687	1.28472e+07	1.05171e+07	6.01957e+06	6.6648e+06	2.16948e+06	2.42043e+06
	B1X6G8 [53-59]	HIGGGHK		0	2	353.193	16.1202	2	4.6	228.6	129	37.7	28053.6	41872.8	1.8606e+06	1.57083e+06	904450	1029317	317267	250759
	B1X6G8 [70-80]	NKDGIPAVVER		1	3	399.892	32.8854	12	46.2	113.4	171.5	69	358709	403652	1.05713e+06	824987	1.43084e+06	1.39448e+06	543554	594154
	B1X6G8 [72-80]	DGIPAVVER		0	2	478.264	38.1574	8	18.6	262.7	92.4	26.3	274173	394967	5.39007e+06	3.98871e+06	1.54796e+06	1.71854e+06	445024	484815
	B1X6G8 [81-87]	LEYDPNR		0	2	453.719	28.9015	3	22.4	229.9	110.5	37.2	526771	875357	8.08752e+06	6.00384e+06	3.38117e+06	3314070	1.01195e+06	1.25534e+06
	B1X6G8 [88-97]	SANIALVLYK		0	2	546.327	50.1857	9	26.2	191.7	131.8	50.3	1.44077e+06	1618525	12295203	10162642	7.11869e+06	8.30176e+06	2.95764e+06	2.90705e+06
FALSE	C4ZRR4	Ribosome-recycling factor [OS=Escherichia coli BW2952]	64	15	15	20.6	6.89	145	287.7	62.1	38	12.1	1.40608e+08	1.6996e+08	3.65274e+07	3.0511e+07	2.03336e+07	2.05495e+07	6.39189e+06	6.64479e+06
	Positions in Master Proteins	Sequence	Modifications	# Missed Cleavages	PSM Charge (by Search Engine): Sequest HT	PSM m/z [Da] (by Search Engine): Sequest HT	PSM RT [min] (by Search Engine): Sequest HT	# PSMs	Abundances (Grouped): 1	Abundances (Grouped): 2	Abundances (Grouped): 3	Abundances (Grouped): 4	Abundance: F5: Sample, 1	Abundance: F6: Sample, 1	Abundance: F7: Sample, 2	Abundance: F8: Sample, 2	Abundance: F9: Sample, 3	Abundance: F10: Sample, 3	Abundance: F11: Sample, 4	Abundance: F12: Sample, 4
	C4ZRR4 [100-109]	VPLPPLTEER		0	2	575.827	44.2734	18	295	61.6	34.3	9.1	29120342	32253252	6.9266e+06	5904506	3.62473e+06	3498242	943422	953953
	C4ZRR4 [116-125]	IVRGEAEQAR		1	3	376.875	20.1452	1	279.4	41.1	42.6	36.9	129012	217784	29078.6	20888.1	25638	25518.2	19775.5	24744.9
	C4ZRR4 [145-155]	DKEISEDDDRR		2	3	459.879	20.1798	10	200.7	116.4	67.4	15.5	3.90993e+06	6.45071e+06	3.08293e+06	2.75102e+06	1.66357e+06	1710787	311863	479205
	C4ZRR4 [147-155]	EISEDDDRR		1	3	378.839	20.4004	1	172.2	146.6	63.2	18	115294	178598	117156	127481	49200	56400	13082.8	17250
	C4ZRR4 [163-169]	LTDAAIK		0	2	366.218	25.8895	3	250.1	91.7	45	13.2	5.0621e+06	7.75464e+06	2501992	2.1065e+06	1.16307e+06	1.09416e+06	296245	366414
	C4ZRR4 [163-170]	LTDAAIKK		1	2	430.266	22.2256	1	273.6	66.8	46.1	13.6	2.84689e+06	4749175	949417	847760	619683	618604	184021	181654
	C4ZRR4 [170-185]	KIEAALADKEAELMQF	1xOxidation [M14]	2	3	608.315	49.1569	5	310.2	30.9	40.9	18	7.20898e+06	6.73417e+06	781998	615536	921052	915622	397057	412617
	C4ZRR4 [171-178]	IEAALADK		0	2	415.735	28.2195	4	222.1	126.4	42	9.4	925921	1422067	696847	611717	224109	210459	45303.5	52381.5
	C4ZRR4 [171-185]	IEAALADKEAELMQF		1	2	839.921	58.7477	6	305.3	52.8	31	10.9	4.14709e+06	5051016	868541	721609	426161	505664	160684	166524
	C4ZRR4 [171-185]	IEAALADKEAELMQF	1xOxidation [M13]	1	2	847.919	51.7905	6	270.5	75	40.8	13.7	8.29407e+06	9754655	2.74939e+06	2264787	1.32e+06	1.39488e+06	448299	461145
	C4ZRR4 [32-52]	ASPSLLDGIVVEYYGTPTPLR		0	3	750.066	66.8277	16	325.2	37.9	24.8	12.2	14508768	18631380	2.13919e+06	1.71316e+06	1.21657e+06	1.29359e+06	719856	525803
	C4ZRR4 [53-63]	QLASVTVEDSR		0	2	602.811	33.6795	26	292	59.8	37.1	11.2	2.54751e+07	3.07982e+07	6.2701e+06	5.253e+06	3553189	3.56133e+06	1.00873e+06	1.13485e+06
	C4ZRR4 [67-72]	INVFDR		0	2	382.208	38.6089	8	306	51.1	32.5	10.4	17234290	19506680	3.31342e+06	2832735	1.95935e+06	1.93983e+06	602841	642385
	C4ZRR4 [73-80]	SMSPAVEK		0	2	424.712	24.1507	8	244.7	88.7	49.2	17.4	2.03751e+06	3.41523e+06	1.18449e+06	773007	495635	568319	185311	189291
	C4ZRR4 [73-80]	SMSPAVEK	1xOxidation [M2]	0	2	432.71	20.216	1	158.6	131.4	86	24.1	1387034	1.68052e+06	1.30109e+06	1.22913e+06	864908	791633	210890	254571
	C4ZRR4 [81-109]	AIMASDLGLNPNSAGSDIRVPLPPLTEER		1	3	1011.86	60.3579	3	346	21.4	19.8	12.9	1.3956e+06	1.59553e+06	108237	78470	78264.5	93411.4	54929.2	55954.7
	C4ZRR4 [81-109]	AIMASDLGLNPNSAGSDIRVPLPPLTEER	1xOxidation [M3]	1	3	1017.19	58.6816	5	330.6	28.6	26.2	14.5	2.34632e+06	2.93365e+06	277825	185640	189306	229030	164833	80527.7
	C4ZRR4 [81-99]	AIMASDLGLNPNSAGSDIR		0	2	951.475	49.577	9	304.3	51.7	33.5	10.5	4843718	5.23209e+06	972023	752399	549045	560694	173398	174904
	C4ZRR4 [81-99]	AIMASDLGLNPNSAGSDIR	1xOxidation [M3]	0	2	959.473	46.8233	14	292.8	54.6	39.8	12.8	9.6199e+06	1.1601e+07	2.25707e+06	1.72165e+06	1.39009e+06	1.48129e+06	451345	470620
FALSE	C4ZUF6	Large ribosomal subunit protein uL15 [OS=Escherichia coli BW2952]	73	14	14	15	11.18	131	2.3	283.4	95.8	18.6	1.76745e+06	2.27412e+06	2.80974e+08	2.24221e+08	8.0824e+07	8.90035e+07	1.60325e+07	1.6961e+07
	Positions in Master Proteins	Sequence	Modifications	# Missed Cleavages	PSM Charge (by Search Engine): Sequest HT	PSM m/z [Da] (by Search Engine): Sequest HT	PSM RT [min] (by Search Engine): Sequest HT	# PSMs	Abundances (Grouped): 1	Abundances (Grouped): 2	Abundances (Grouped): 3	Abundances (Grouped): 4	Abundance: F5: Sample, 1	Abundance: F6: Sample, 1	Abundance: F7: Sample, 2	Abundance: F8: Sample, 2	Abundance: F9: Sample, 3	Abundance: F10: Sample, 3	Abundance: F11: Sample, 4	Abundance: F12: Sample, 4
	C4ZUF6 [1-13]	MRLNTLSPAEGSK	1xOxidation [M1]	1	3	473.915	28.3928	2	48.3	196.2	99	56.5	60573.4	72183.3	300274	239942	135941	134916	71180.8	83854.3
	C4ZUF6 [110-123]	VILAGEVTTPVTVR		0	2	727.932	47.1961	16	1.1	300.8	83.4	14.6	201215	238424	6.73529e+07	5.29455e+07	1.46206e+07	1.87671e+07	2.80661e+06	3.00052e+06
	C4ZUF6 [133-141]	AAIEAAGGK		0	2	394.218	21.3021	8	0.3	315.3	73.8	10.7	4820.39	24901.9	12770008	11505202	2.95253e+06	2.7267e+06	366862	458179
	C4ZUF6 [133-144]	AAIEAAGGKIEE		1	2	579.805	33.6798	2	2.2	258.1	115.6	24.2	113640	133896	15918533	13390301	6432466	6.6477e+06	1.25894e+06	1.4849e+06
	C4ZUF6 [22-29]	GIGSGLGK		0	2	344.703	27.5332	2	1.2	296.4	86.7	15.7	23457.6	97237.9	12437577	10668100	3382344	3.35337e+06	549896	676037
	C4ZUF6 [3-13]	LNTLSPAEGSK		0	2	558.799	29.5145	9	2.5	288.3	92.3	16.9	171436	300164	28396842	23919960	8204903	8484525	1.4297e+06	1.63341e+06
	C4ZUF6 [48-59]	RGFEGGQMPLYR		1	3	470.903	40.5044	4	9.1	230.7	128	32.2	23067.3	23820.6	694543	513923	321149	342075	81349.9	85529.6
	C4ZUF6 [48-59]	RGFEGGQMPLYR	1xOxidation [M8]	1	3	476.234	33.7973	5	2.4	267.6	105.3	24.7	15184.4	14215.3	1.9597e+06	1.34072e+06	659299	617383	144084	155384
	C4ZUF6 [49-59]	GFEGGQMPLYR		0	2	627.8	44.9334	8	0.7	279.1	101.4	18.8		19725.2	8734188	6916457	2865834	2781046	512878	535506
	C4ZUF6 [49-59]	GFEGGQMPLYR	1xOxidation [M7]	0	2	635.797	37.8197	15	3.8	280.8	96.8	18.6	197051	259919	19513696	14310764	5.5237e+06	6.00782e+06	1.06473e+06	1.14608e+06
	C4ZUF6 [64-69]	FGFTSR		0	2	357.68	36.1402	10	3.2	277.3	102.4	17.1	183049	202446	18826628	14347394	6.07596e+06	6.06588e+06	964297	1.06094e+06
	C4ZUF6 [70-78]	KAAITAEIR		1	2	486.795	28.0286	10	2.2	182.2	179.9	35.7	58492.5	65132.5	5.4636e+06	4.80419e+06	5.16378e+06	4.95423e+06	931877	1.07797e+06
	C4ZUF6 [71-78]	AAITAEIR		0	2	422.748	33.7253	20	1.9	331.5	57.9	8.6	102777	127480	2.21353e+07	18002840	3.51939e+06	3.45672e+06	479986	564475
	C4ZUF6 [79-84]	LSDLAK		0	1	646.375	23.7377	6		205.2	82.6	12.2			1.60509e+06	1323699	514325	669823	77030.6	97314.5
	C4ZUF6 [85-96]	VEGGVVDLNTLK		0	2	622.348	45.3097	5	1.8	284.2	97.7	16.3	268614	297763	53332744	38695288	15797391	15448024	2536265	2.6619e+06
	C4ZUF6 [97-109]	AANIIGIQIEFAK		0	2	694.401	58.7676	19	7.2	221.9	122.6	48.3	344075	396808	1.15325e+07	1.12971e+07	4.6544e+06	8.54617e+06	2.75681e+06	2.23902e+06
FALSE	P0A6Y8	Chaperone protein DnaK [OS=Escherichia coli K-12]	60	33	33	69.1	4.97	131	108.4	195	73.3	23.3	1.15978e+07	1.39921e+07	2.50026e+07	2.10094e+07	8.55882e+06	8.67628e+06	2.69216e+06	2.79034e+06
	Positions in Master Proteins	Sequence	Modifications	# Missed Cleavages	PSM Charge (by Search Engine): Sequest HT	PSM m/z [Da] (by Search Engine): Sequest HT	PSM RT [min] (by Search Engine): Sequest HT	# PSMs	Abundances (Grouped): 1	Abundances (Grouped): 2	Abundances (Grouped): 3	Abundances (Grouped): 4	Abundance: F5: Sample, 1	Abundance: F6: Sample, 1	Abundance: F7: Sample, 2	Abundance: F8: Sample, 2	Abundance: F9: Sample, 3	Abundance: F10: Sample, 3	Abundance: F11: Sample, 4	Abundance: F12: Sample, 4
	P0A6Y8 [110-121]	MAPPQISAEVLK	1xOxidation [M1]	0	2	650.354	43.172	1	88.9	202.2	83.4	25.4	79285.1	85561.3		187363	77705.2	76896.1	23084.9	24081.3
	P0A6Y8 [160-166]	IAGLEVK		0	2	365.229	34.9878	4	112.2	196.5	68.9	22.5	281819	260456	552969	407183	165012	167585	51823.4	56714.1
	P0A6Y8 [167-183]	RIINEPTAAALAYGLDK		1	3	606.006	49.8056	2	92.6	199.8	85	22.6	92107.4	94034.5	216829	186069	82141.7	88976.8	26114.4	19711.6
	P0A6Y8 [168-183]	IINEPTAAALAYGLDK		0	2	830.448	54.0302	6	108.5	201	69.6	21	285064	302871	632924	468520	169638	209299	61534.3	52435.1
	P0A6Y8 [215-235]	TFEVLATNGDTHLGGEDFDSR		0	3	761.019	49.4942	4	74.4	225.1	81.9	18.6	97569.8	128663	362205	317310	119955	126792	28968	27138.3
	P0A6Y8 [236-245]	LINYLVEEFK		0	2	634.35	58.3738	4	130.7	179.8	68.9	20.6	288690	361558	474457	416606	157084	184639	55740.7	46625.2
	P0A6Y8 [236-246]	LINYLVEEFKK		1	3	465.934	52.2164	3	135	170.9	68.3	25.9	400459	483160	645476	480426	223486	221842	80913.3	87945.8
	P0A6Y8 [246-253]	KDQGIDLR		1	2	472.762	27.3047	2	108.6	208.7	67.3	15.5	99983.2	115021	227882	186468	64559	68393.5	15349.3	15264.4
	P0A6Y8 [247-253]	DQGIDLR		0	2	408.714	33.3194	3	116.2	189.4	71.7	22.7	204804	240742	398681	328189	135779	138097	38086.6	49332.9
	P0A6Y8 [254-261]	NDPLAMQR		0	2	472.735	32.918	1	127.1	182.7	71.2	18.9	97019.1	121403	177304	137307	59716	61892.3	12931.6	20239.9
	P0A6Y8 [254-261]	NDPLAMQR	1xOxidation [M6]	0	2	480.732	26.4325	2	64.4	228.1	81.7	25.8	70926.6		270351	233505	93425.8	86795.1	25653.7	31519.1
	P0A6Y8 [26-34]	VLENAEGDR		0	2	501.747	24.0394	4	27.9	202.7	69.4			114312	905943	764388	290049	279744
	P0A6Y8 [271-294]	IELSSAQQTDVNLPYITADATGPK		0	3	844.769	54.8912	3	118.8	186.5	71.6	23.1	212619	232835	400888	304556	119987	149806	46539.1	40266.9
	P0A6Y8 [305-315]	LESLVEDLVNR		0	2	643.852	57.0092	7	109.1	192.9	74.7	23.2	691432	744096	1.34501e+06	1.19541e+06	472438	510055	167822	139106
	P0A6Y8 [322-345]	VALQDAGLSVSDIDDVILVGGQTR		0	2	1221.15	66.035	8	99.6	187.3	83.9	29.2	207744	337343	541644	458071	220147	226315	83853.8	71728
	P0A6Y8 [35-55]	TTPSIIAYTQDGETLVGQPAK		0	2	1095.57	54.2744	2	61	184.4	54.7		108240	129855	431060	297993	97334.9	115993
	P0A6Y8 [35-56]	TTPSIIAYTQDGETLVGQPAKR		1	3	782.749	51.4329	1	116	112.8	71.2		117785	136014	149708	101173	91349.2	66070.2
	P0A6Y8 [353-359]	VAEFFGK		0	2	399.214	39.901	2	77.7	240.8	65.3	16.3	117065	126441	417065	340987	102842	101674	23566.8	27598.3
	P0A6Y8 [363-387]	KDVNPDEAVAIGAAVQGGVLTGDVK		1	3	808.429	54.7042	3	96.9	206.7	76.5	20	358693	408310	846253	788046	289569	315235	81476.5	76776.6
	P0A6Y8 [422-445]	HSQVFSTAEDNQSAVTIHVLQGER		0	4	664.079	45.5453	13	112.9	185.1	69.3	32.6	1.15275e+06	1.33582e+06	2.10528e+06	1.9681e+06	733072	792914	370033	348048
	P0A6Y8 [453-467]	SLGQFNLDGINPAPR		0	2	799.918	53.4835	8	144.1	145.3	77.1	33.4	1.14654e+06	1.24637e+06	1.35496e+06	1.07261e+06	606311	675442	284805	269626
	P0A6Y8 [503-514]	ASSGLNEDEIQK		0	2	645.811	30.8409	3	135.6	163.9	72.3	28.2	1.51346e+06	1.78187e+06	2097789	1.87666e+06	904076	847035	273536	425669
	P0A6Y8 [518-528]	DAEANAEADRK		1	3	397.187	19.9177	5	36.6	224.9	106.7	31.9	74113.9	175823	723907	680274	327570	338063	83607.9	118157
	P0A6Y8 [529-536]	FEELVQTR		0	2	511.268	37.0443	4	120.3	183.8	78.6	17.3	1.13237e+06	1.29122e+06	2.07012e+06	1650001	770030	811201	191687	157784
	P0A6Y8 [537-547]	NQGDHLLHSTR		0	3	426.55	23.1813	6	142.7	166.4	66.5	24.3	730892	785307	930522	838029	392603	317533	122246	136552
	P0A6Y8 [548-562]	KQVEEAGDKLPADDK		2	3	548.281	24.4774	2	83.6	253.1	52.2	11	129083	142538	496470	339725	84977.7	84379.6	17749.6	18105.1
	P0A6Y8 [549-562]	QVEEAGDKLPADDK		1	3	505.583	27.4055	1	60.4	282.8	45.4	11.3	101270	116038	550487	467626	82024.6	80996.3	19048.4	21508
	P0A6Y8 [563-577]	TAIESALTALETALK		0	2	766.433	75.8903	2	67.1	280.1	41.6	11.2	43893.9	46217.7	201737	175173	24381.8	31983.2	7549.07
	P0A6Y8 [563-581]	TAIESALTALETALKGEDK		1	3	654.352	72.607	5	73	255.2	55.1	16.7	386403	557361	1.80886e+06	1.45337e+06	345938	353944	142144	79257.3
	P0A6Y8 [57-70]	QAVTNPQNTLFAIK		0	2	772.926	49.8085	2	93.5	216.2	76.2	14.2	161327	157165	409865	330717	130892	128617	20917.3	27810.5
	P0A6Y8 [588-597]	MQELAQVSQK		0	2	581.3	31.8894	6	165.3	123.7	81.2	29.9	483806	677042	541474	338870	264584	298572	93541.3	114261
	P0A6Y8 [588-597]	MQELAQVSQK	1xOxidation [M1]	0	2	589.299	27.6481	6	99.5	194	77	29.5	325450	589125	931756	782156	360868	318100	120110	140298
	P0A6Y8 [598-622]	LMEIAQQQHAQQQTAGADASANNAK		0	3	875.423	32.8984	2	33.2	235.8	31		20593.2	26807.6	185727	149738	22637.3	21281.4
	P0A6Y8 [598-622]	LMEIAQQQHAQQQTAGADASANNAK	1xOxidation [M2]	0	3	880.752	28.9453	2	29.4	244.1	26.5		29116.3	31421.3	282480	223088	25276.4	29394.4
	P0A6Y8 [77-84]	FQDEEVQR		0	2	525.747	27.409	1	76.4	216.1	78.8	28.6	255225	498897	1.11605e+06	912479	385868	350725	121729	146779
	P0A6Y8 [85-92]	DVSIMPFK		0	2	468.747	50.6823	1	91.8	151.1	57.1		100211	110444	198419	151242	65493.9
FALSE	P60438	Large ribosomal subunit protein uL3 [OS=Escherichia coli K-12]	67	14	14	22.2	9.91	124	52.6	199.7	114.3	33.5	8.40522e+06	1.15801e+07	4.17681e+07	3.36037e+07	2.10756e+07	2.18003e+07	6.41454e+06	6.14458e+06
	Positions in Master Proteins	Sequence	Modifications	# Missed Cleavages	PSM Charge (by Search Engine): Sequest HT	PSM m/z [Da] (by Search Engine): Sequest HT	PSM RT [min] (by Search Engine): Sequest HT	# PSMs	Abundances (Grouped): 1	Abundances (Grouped): 2	Abundances (Grouped): 3	Abundances (Grouped): 4	Abundance: F5: Sample, 1	Abundance: F6: Sample, 1	Abundance: F7: Sample, 2	Abundance: F8: Sample, 2	Abundance: F9: Sample, 3	Abundance: F10: Sample, 3	Abundance: F11: Sample, 4	Abundance: F12: Sample, 4
	P60438 [1-7]	MIGLVGK	1xOxidation [M1]	0	2	367.218	32.4249	5	27.7	236.5	104.3	31.4	180273	253558	2.00351e+06	1.66155e+06	817040	792578	232206	253147
	P60438 [106-114]	KVDVTGTSK		1	2	467.763	19.4874	6	6.6	194.8	154.8	43.8	27690.3	67903.3	1.40639e+06	1.16328e+06	1.02554e+06	1.00757e+06	274861	300203
	P60438 [107-114]	VDVTGTSK		0	2	403.716	21.5437	6	2.5	258.7	116.1	22.7	11488.7	36235	2297178	2.01912e+06	987400	946818	181664	197245
	P60438 [117-123]	GFAGTVK		0	2	340.192	26.2082	4	7.4	252.1	112	28.5	23005.5	136921	2.11355e+06	1.72703e+06	902121	798560	198749	235307
	P60438 [129-141]	TQDATHGNSLSHR		0	2	712.336	19.5565	10	4.4	236.9	135.3	23.4	40410.5	97828.8	3542603	3.24418e+06	1.91664e+06	1.95669e+06	298896	375618
	P60438 [14-33]	IFTEDGVSIPVTVIEVEANR		0	2	1094.58	64.0253	13	17	214.8	137.6	30.5	276542	271958	3.72015e+06	3.21295e+06	2.04567e+06	2396985	554142	434653
	P60438 [161-169]	MAGQMGNER		0	2	497.216	22.797	3	4.7	180.5	189.9	24.9		7350.45	392093	205488	290564	307049	33339.6	45981.8
	P60438 [161-169]	MAGQMGNER	1xOxidation [M]	0	2	505.213	20.0052	7		179.1	109.8	11.1			966535	641312	471731	494393	40256.6	59100.1
	P60438 [161-169]	MAGQMGNER	2xOxidation [M1; M5]	0	2	513.21	17.1754	3	5.8	221.6	153.9	18.7		7264.97	223076	344016	213493	173332	26389.3	20782.5
	P60438 [170-179]	VTVQSLDVVR		0	2	558.325	43.0526	6	6.3	244.3	130.3	19	187653	218336	8479187	7170840	4.10855e+06	4209717	576169	640663
	P60438 [191-208]	GAVPGATGSDLIVKPAVK		0	3	560.662	40.0326	11	6.6	245.7	129.8	17.9	113298	131278	5.16661e+06	3.96182e+06	2.31217e+06	2.47237e+06	313300	345306
	P60438 [39-46]	DLANDGYR		0	2	462.214	29.7776	9	10.5	238.9	124.4	26.2	67334.5	198080	3017203	2.29964e+06	1.45597e+06	1.29096e+06	254006	328759
	P60438 [60-70]	VTKPEAGHFAK		0	3	395.552	22.5873	5	15	250.9	115.1	19.1	106724	152880	2.35538e+06	1.94069e+06	1.01275e+06	949535	150092	175936
	P60438 [71-77]	AGVEAGR		0	2	330.177	18.9413	1	1.9	237.5	145	15.6	4077.22	8857.38	726605	742287	464485	432612	50324.1	46165.7
	P60438 [84-105]	LAEGEEFTVGQSISVELFADVK		0	2	1184.6	69.5023	29	177.2	94	68.3	60.6	4.21993e+06	5.42382e+06	2.97852e+06	2.16305e+06	1.7534e+06	1.93718e+06	1.89771e+06	1.40856e+06
	P60438 [84-106]	LAEGEEFTVGQSISVELFADVKK		1	3	832.767	65.1047	6	185.5	79.4	71.3	63.8	3.14679e+06	4567860	2.3795e+06	1.10648e+06	1.29805e+06	1.63399e+06	1.33243e+06	1.27716e+06
FALSE	P0AG48	Large ribosomal subunit protein bL21 [OS=Escherichia coli K-12]	67	6	6	11.6	9.85	117	44.9	209.8	100.8	44.5	1.94911e+07	2.1407e+07	1.06623e+08	8.52836e+07	4.43182e+07	4.73483e+07	1.99441e+07	2.05343e+07
	Positions in Master Proteins	Sequence	Modifications	# Missed Cleavages	PSM Charge (by Search Engine): Sequest HT	PSM m/z [Da] (by Search Engine): Sequest HT	PSM RT [min] (by Search Engine): Sequest HT	# PSMs	Abundances (Grouped): 1	Abundances (Grouped): 2	Abundances (Grouped): 3	Abundances (Grouped): 4	Abundance: F5: Sample, 1	Abundance: F6: Sample, 1	Abundance: F7: Sample, 2	Abundance: F8: Sample, 2	Abundance: F9: Sample, 3	Abundance: F10: Sample, 3	Abundance: F11: Sample, 4	Abundance: F12: Sample, 4
	P0AG48 [1-10]	MYAVFQSGGK		0	2	544.265	40.7794	8	10.5	194.6	138.2	56.7	250285	322487	6453164	4.25373e+06	3.69817e+06	3747465	1.43802e+06	1.61861e+06
	P0AG48 [1-10]	MYAVFQSGGK	1xOxidation [M1]	0	2	552.264	36.2075	26	12.9	243.1	100	44	621271	752457	15599353	10704865	5.20945e+06	5.427e+06	2.27538e+06	2.40682e+06
	P0AG48 [14-21]	VSEGQTVR		0	2	438.233	20.3234	6	1.7	255.6	108	34.7	105130	192483	22695996	19345222	8566333	9147723	2.51375e+06	3.22445e+06
	P0AG48 [25-48]	LDIATGETVEFAEVLMIANGEEVK		0	3	860.104	75.8369	18	206	100.2	48.9	44.9	6.26102e+06	5.48922e+06	3.43954e+06	2.36597e+06	1.48928e+06	1.30024e+06	1.46311e+06	1.11806e+06
	P0AG48 [25-48]	LDIATGETVEFAEVLMIANGEEVK	1xOxidation [M16]	0	3	865.436	72.0453	26	198	96.8	55.1	50.1	1.08896e+07	1.31211e+07	7167363	4.76091e+06	3.06382e+06	3.6087e+06	3.22592e+06	2.83758e+06
	P0AG48 [49-60]	IGVPFVDGGVIK		0	2	600.854	55.3316	19	8.1	226.6	116.6	48.6	1.03804e+06	1.14011e+06	3.3223e+07	2.76462e+07	1.47206e+07	1.65237e+07	6.559e+06	6.45336e+06
	P0AG48 [61-68]	AEVVAHGR		0	2	419.73	18.6677	6	1.8	259	105.1	34	69178.5	118468	13204018	12240096	5.15545e+06	5.16172e+06	1.49575e+06	1.86189e+06
	P0AG48 [91-97]	QWFTDVK		0	2	462.235	45.25	8	13.1	217.4	120.2	49.3	256531	270715	4840692	3.96666e+06	2.41505e+06	2431814	973160	1.0135e+06
FALSE	P02359	Small ribosomal subunit protein uS7 [OS=Escherichia coli K-12]	72	18	18	20	10.36	117	11.5	254.2	107.6	26.8	5.50578e+06	6.23351e+06	1.43128e+08	1.17578e+08	5.32175e+07	5.6694e+07	1.34494e+07	1.3863e+07
	Positions in Master Proteins	Sequence	Modifications	# Missed Cleavages	PSM Charge (by Search Engine): Sequest HT	PSM m/z [Da] (by Search Engine): Sequest HT	PSM RT [min] (by Search Engine): Sequest HT	# PSMs	Abundances (Grouped): 1	Abundances (Grouped): 2	Abundances (Grouped): 3	Abundances (Grouped): 4	Abundance: F5: Sample, 1	Abundance: F6: Sample, 1	Abundance: F7: Sample, 2	Abundance: F8: Sample, 2	Abundance: F9: Sample, 3	Abundance: F10: Sample, 3	Abundance: F11: Sample, 4	Abundance: F12: Sample, 4
	P02359 [103-109]	WIVEAAR		0	2	422.737	39.1838	8	11.7	261.7	103.9	22.6	253433	290471	7221911	5062928	2.37603e+06	2423304	488233	560053
	P02359 [11-17]	KILPDPK		1	2	405.757	26.4166	3	13.8	246.3	114.9	25	95386.8	117556	2.19809e+06	1.61472e+06	884380	873179	173945	210565
	P02359 [12-17]	ILPDPK		0	2	341.711	27.5638	4	8.8	292.7	79.4	19.1	48120.4	125792	2.98015e+06	2.26946e+06	730024	681531	165946	174357
	P02359 [120-131]	LANELSDAAENK		0	2	637.814	33.5524	8	10.2	264.3	103.4	22.1	745105	936802	24186456	19476310	8650245	8.33937e+06	1.73091e+06	1908997
	P02359 [138-143]	REDVHR		1	2	406.212	16.6777	4	1.4	279.7	99.3	19.7	9462.38	16525.6	2.65921e+06	2.43498e+06	910514	896212	179899	178574
	P02359 [150-155]	AFAHYR		0	2	382.696	24.0959	8	14.3	258.5	103.2	23.9	160437	191999	3.75976e+06	2.66439e+06	1.17997e+06	1.35338e+06	278778	307286
	P02359 [161-171]	SFSHQAGASSK		0	2	553.764	19.2948	8	3.1	264.6	109.4	22.9	69310.9	125003	8.02231e+06	7.89706e+06	3.32949e+06	3.24947e+06	614897	771417
	P02359 [18-25]	FGSELLAK		0	2	432.745	39.6571	4	12.4	249.8	110.3	27.5	644191	755197	15335966	12798641	6.02701e+06	6351215	1.42585e+06	1.66447e+06
	P02359 [26-35]	FVNILMVDGK		0	2	568.313	54.2554	4	9.1	268	102.7	20.2	73379.6	82725.9	2.53265e+06	2.06399e+06	790484	971302	182993	162294
	P02359 [26-35]	FVNILMVDGK	1xOxidation [M6]	0	2	576.31	50.8052	5	8.2	273.2	99.7	18.9	219231	307211	9298043	8.03518e+06	2.90835e+06	3419533	629585	570821
	P02359 [26-36]	FVNILMVDGKK		1	2	632.36	47.3868	6	14.7	240.1	114.3	30.8	110530	154086	2.35812e+06	1.91747e+06	1.0378e+06	988284	262354	284035
	P02359 [26-36]	FVNILMVDGKK	1xOxidation [M6]	1	2	640.358	44.4163	6	13.3	240.4	118	28.3	389334	275514	6.46724e+06	5.43949e+06	2.89693e+06	2.92566e+06	702521	693879
	P02359 [36-53]	KSTAESIVYSALETLAQR		1	3	656.352	69.0238	3	27.5	75.1	215.7	81.8	52413.9	52953	159677	130109	371851	460631	170810	144206
	P02359 [37-53]	STAESIVYSALETLAQR		0	2	919.98	75.1376	12	15.3	254.8	97.4	32.5	657834	766136	12618400	1.11417e+07	4.28147e+06	4.80294e+06	1.65077e+06	1.38807e+06
	P02359 [57-76]	SELEAFEVALENVRPTVEVK		0	2	1130.09	65.2859	10	14	245.7	107.1	33.2	1.17637e+06	1.06506e+06	2.14388e+07	1.79058e+07	7.72697e+06	9.44817e+06	2.68939e+06	2.60036e+06
	P02359 [79-95]	RVGGSTYQVPVEVRPVR		1	4	475.519	37.8413	5	10.6	255.9	108.7	24.8	121447	124204	3383472	2.5994e+06	1.23749e+06	1.28243e+06	274700	300803
	P02359 [79-96]	RVGGSTYQVPVEVRPVRR		2	4	514.545	34.4652	5		171.7	92.9	35.5			968967	713197	441475	458166	169589	173932
	P02359 [80-95]	VGGSTYQVPVEVRPVR		0	3	581.656	40.92	6	11	250.9	115.6	22.5	465687	535217	12869813	10075881	5.16693e+06	5329669	976754	1.07063e+06
	P02359 [80-96]	VGGSTYQVPVEVRPVRR		1	3	633.69	37.112	6	16.4	194.6	143.6	45.3	184144	237739	3.01619e+06	2.05309e+06	1.74704e+06	1.93021e+06	584035	575414
	P02359 [97-102]	NALAMR		0	2	338.184	27.5191	2	8.8	273.7	97	20.6	29959.8	73321.4	1.65276e+06	1.28375e+06	523038	509337	97425.9	122823
FALSE	B1XDV1	Small ribosomal subunit protein bS6 [OS=Escherichia coli str. K-12 substr. DH10B]	82	9	9	15.2	5.39	116	18.2	183.7	117.7	80.4	8.32855e+06	9.48815e+06	1.02743e+08	7.83608e+07	5.6595e+07	5.84478e+07	3.7319e+07	4.13246e+07
	Positions in Master Proteins	Sequence	Modifications	# Missed Cleavages	PSM Charge (by Search Engine): Sequest HT	PSM m/z [Da] (by Search Engine): Sequest HT	PSM RT [min] (by Search Engine): Sequest HT	# PSMs	Abundances (Grouped): 1	Abundances (Grouped): 2	Abundances (Grouped): 3	Abundances (Grouped): 4	Abundance: F5: Sample, 1	Abundance: F6: Sample, 1	Abundance: F7: Sample, 2	Abundance: F8: Sample, 2	Abundance: F9: Sample, 3	Abundance: F10: Sample, 3	Abundance: F11: Sample, 4	Abundance: F12: Sample, 4
	B1XDV1 [113-131]	RDDFANETADDAEAGDSEE		1	2	1028.9	36.0181	2		139.9	87.5	72.6			349884	233624	202849	157568	134534	163462
	B1XDV1 [25-35]	YTAAITGAEGK		0	2	541.28	30.1855	7	20.3	195.2	116.3	68.3	2.76645e+06	3.4936e+06	34679648	25818582	18041100	17621752	9734996	11247693
	B1XDV1 [3-24]	HYEIVFMVHPDQSEQVPGMIER		0	4	661.068	53.5933	13	27.8	85.6	165.5	121.1	214015	256771	879499	593825	1.27338e+06	1.53296e+06	1.04456e+06	1.00119e+06
	B1XDV1 [3-24]	HYEIVFMVHPDQSEQVPGMIER	1xOxidation [M]	0	4	665.068	50.4934	9	12.4	141.1	126.9	119.6	133716	196365	2.12405e+06	1.60712e+06	1.45852e+06	1.89248e+06	1.69165e+06	1.4478e+06
	B1XDV1 [3-24]	HYEIVFMVHPDQSEQVPGMIER	2xOxidation [M7; M19]	0	4	669.066	47.2072	31	6.6	201	69.6	122.8	207991	168591	6.2481e+06	5.19623e+06	1.88216e+06	2.06702e+06	3.50945e+06	3.45541e+06
	B1XDV1 [39-44]	LEDWGR		0	2	388.189	33.384	3	17.8	188.9	128.6	64.8	279359	322640	3.91057e+06	2.60021e+06	2.19804e+06	2144616	1.05419e+06	1.1345e+06
	B1XDV1 [45-53]	RQLAYPINK		1	3	368.216	30.7975	7	19.7	173.5	125.8	81	305929	327182	3.28721e+06	2.36818e+06	1.9523e+06	2.0974e+06	1.20149e+06	1.4131e+06
	B1XDV1 [46-53]	QLAYPINK		0	2	473.771	35.8071	6	17.4	190.8	119.1	72.7	429648	497475	5758627	4.47232e+06	3176878	3.15661e+06	1.85058e+06	2.01819e+06
	B1XDV1 [57-79]	AHYVLMNVEAPQEVIDELETTFR		0	3	902.115	74.4725	8	34	165	115.1	85.9	342309	426466	2.29584e+06	1.4987e+06	1.25891e+06	1.3311e+06	1.05604e+06	882986
	B1XDV1 [57-79]	AHYVLMNVEAPQEVIDELETTFR	1xOxidation [M6]	0	3	907.447	70.9601	8	31.5	149.7	100.6	118.1	1.11258e+06	792697	5.33897e+06	3.72661e+06	2604105	3.44834e+06	3504352	3533457
	B1XDV1 [80-86]	FNDAVIR		0	2	417.727	34.1789	10	15.1	185.4	124.6	74.9	1.50192e+06	1.58762e+06	20857832	17117942	12580725	12821273	7036170	8.2836e+06
	B1XDV1 [94-104]	HAVTEASPMVK		0	2	585.303	25.9418	8	19.8	184	121.4	74.8	737444	904907	9007999	6385014	4949414	5059440	2.74319e+06	3.46863e+06
	B1XDV1 [94-104]	HAVTEASPMVK	1xOxidation [M9]	0	2	593.301	22.8403	4	9.9	185.9	128.2	76	297182	513846	8.00494e+06	6.74247e+06	5.01663e+06	5.11723e+06	2.75779e+06	3.27461e+06
FALSE	P06987	Histidine biosynthesis bifunctional protein HisB [OS=Escherichia coli K-12]	55	17	17	40.3	6.18	115	205	77.8	104.2	12.9	5.98155e+07	7.04792e+07	2.81348e+07	2.15955e+07	3.16745e+07	3.4404e+07	4.33223e+06	3.85423e+06
	Positions in Master Proteins	Sequence	Modifications	# Missed Cleavages	PSM Charge (by Search Engine): Sequest HT	PSM m/z [Da] (by Search Engine): Sequest HT	PSM RT [min] (by Search Engine): Sequest HT	# PSMs	Abundances (Grouped): 1	Abundances (Grouped): 2	Abundances (Grouped): 3	Abundances (Grouped): 4	Abundance: F5: Sample, 1	Abundance: F6: Sample, 1	Abundance: F7: Sample, 2	Abundance: F8: Sample, 2	Abundance: F9: Sample, 3	Abundance: F10: Sample, 3	Abundance: F11: Sample, 4	Abundance: F12: Sample, 4
	P06987 [11-26]	DGTLISEPPSDFQVDR		0	2	888.427	49.5026	6	156.7	106.1	118.1	19.1	426894	470490	337093	273226	315171	362188	53421.1	55630.7
	P06987 [11-29]	DGTLISEPPSDFQVDRFDK		1	3	722.683	51.3809	6	203.6	69.4	112.3	14.7	3.17582e+06	3727532	1312499	1.04808e+06	1616745	2.22832e+06	256269	240508
	P06987 [114-122]	YLAEQAMDR		0	2	548.758	34.731	10	218.9	77.3	93.4	10.3	3.47045e+06	4.12715e+06	1.52268e+06	1.17283e+06	1.53883e+06	1.69551e+06	174991	182249
	P06987 [114-122]	YLAEQAMDR	1xOxidation [M7]	0	2	556.756	27.5733	3	170.4	99.7	117.8	12.2	1.97058e+06	3.18713e+06	1.64258e+06	1308456	1843609	1.62843e+06	161987	199369
	P06987 [123-131]	ANSYVIGDR		0	2	497.752	32.2996	4	205.2	78.9	104.3	11.6	4.69024e+06	5.67097e+06	2250839	1.74704e+06	2.64453e+06	2.59899e+06	274219	308601
	P06987 [177-188]	ETQIDVQVWLDR		0	2	751.386	57.6742	8	213.5	68	89.6	28.9	1.10642e+06	1.19565e+06	467609	287170	393304	593206	205861	117604
	P06987 [194-215]	INTGVGFFDHMLDQIATHGGFR		0	3	811.729	69.8247	4	263.4	68.5	56.7	11.4	1.03653e+06	1.32636e+06	367107	253205	247958	256789	52535.5	48837.5
	P06987 [194-215]	INTGVGFFDHMLDQIATHGGFR	1xOxidation [M11]	0	4	613.049	58.5797	5	216.2	68.8	97.1	17.9	598712	649949	222310	177228	252053	311820	74834.1	35666.3
	P06987 [216-221]	MEINVK		0	2	367.199	31.9936	5	217.5	68.3	104	10.2	1.72077e+06	2.2768e+06	621290		921256	973178	91267	95313.5
	P06987 [222-244]	GDLYIDDHHTVEDTGLALGEALK		0	3	828.075	54.4967	6	194.9	83	105.5	16.5	4.8216e+06	5522909	2.35571e+06	2.04985e+06	2557074	3.05253e+06	462717	412449
	P06987 [256-268]	FGFVLPMDECLAR	1xCarbamidomethyl [C10]	0	2	777.876	63.4587	2	252.1	37.6	95.6	14.8	703555	911609	137005	104205	288204	320064	54146.6	40575.4
	P06987 [256-268]	FGFVLPMDECLAR	1xOxidation [M7]; 1xCarbamidomethyl [C10]	0	2	785.875	57.3127	5	218.5	54.1	114.9	12.4	1.50452e+06	1.74557e+06	449375	358666	800765	906183	101726	83724.3
	P06987 [269-282]	CALDISGRPHLEYK	1xCarbamidomethyl [C1]	0	3	553.616	39.2868	6	220.9	61.9	106.6	10.6	2.12383e+06	2225972	700932	528846	985480	1116060	106756	102636
	P06987 [283-289]	AEFTYQR		0	2	457.722	32.1285	1	211.7	81.1	97.1	10	4.52523e+06	5194119	2.1425e+06	1.6101e+06	2.19619e+06	2.2523e+06	220045	238408
	P06987 [290-303]	VGDLSTEMIEHFFR		0	2	840.907	64.7371	10	240.5	58.1	88.1	13.3	4.20235e+06	4.98617e+06	1.22255e+06	1.00155e+06	1.58246e+06	1.77755e+06	286262	223012
	P06987 [290-303]	VGDLSTEMIEHFFR	1xOxidation [M8]	0	3	566.272	56.0843	5	206.7	75.7	104.1	13.5	3.00491e+06	3251080	1.18912e+06	1.1034e+06	1.51081e+06	1.63923e+06	204683
	P06987 [30-42]	LAFEPGVIPELLK		0	2	713.422	64.8384	10	232.4	62.3	93.8	11.5	9322900	10420834	3.25362e+06	2.14778e+06	3.72929e+06	4.24799e+06	509352	466012
	P06987 [304-316]	SLSYTMGVTLHLK		0	3	483.93	50.3672	2	222.5	63.7	91.1	22.7	906131	1.21504e+06	354593	254235	378354	488226	131261	87088.7
	P06987 [304-316]	SLSYTMGVTLHLK	1xOxidation [M6]	0	3	489.262	44.8475	6	137.7	123.2	115.2	23.9	1.27255e+06	1339217	1.2864e+06	1.06138e+06	1.14314e+06	1.04377e+06	270336	189693
	P06987 [326-331]	VESLFK		0	2	361.708	37.6603	1	200.4	84.1	104	11.5	3.12755e+06	3403569	1.57524e+06	1.18931e+06	1638733	1.75165e+06	174212	202353
	P06987 [343-352]	VEGDTLPSSK		0	2	516.763	26.4825	3	137.8	117.4	132	12.8	2.80089e+06	4.23486e+06	3147331	2.7325e+06	3279760	3.31557e+06	291358	353504
	P06987 [5-10]	YLFIDR		0	2	413.727	46.3897	7	199.5	81.4	108.8	10.3	3303051	3.39621e+06	1.57641e+06	1.18641e+06	1.81079e+06	1.84445e+06	173988	171002
FALSE	P62399	Large ribosomal subunit protein uL5 [OS=Escherichia coli K-12]	71	17	17	20.3	9.48	111	26.6	230.6	124.7	18.1	5.33772e+06	6.13438e+06	5.53517e+07	4.44978e+07	2.61502e+07	2.75229e+07	3.92529e+06	3.88391e+06
	Positions in Master Proteins	Sequence	Modifications	# Missed Cleavages	PSM Charge (by Search Engine): Sequest HT	PSM m/z [Da] (by Search Engine): Sequest HT	PSM RT [min] (by Search Engine): Sequest HT	# PSMs	Abundances (Grouped): 1	Abundances (Grouped): 2	Abundances (Grouped): 3	Abundances (Grouped): 4	Abundance: F5: Sample, 1	Abundance: F6: Sample, 1	Abundance: F7: Sample, 2	Abundance: F8: Sample, 2	Abundance: F9: Sample, 3	Abundance: F10: Sample, 3	Abundance: F11: Sample, 4	Abundance: F12: Sample, 4
	P62399 [103-110]	LITIAVPR		0	2	441.792	46.215	3	24.2	251.4	111.5	12.9	323411	363037	3.97533e+06	3.19581e+06	1.59796e+06	1.56205e+06	190771	176032
	P62399 [126-133]	GNYSMGVR		0	2	442.208	29.9725	4	28.8	219.7	136	15.5	120588	173233	1.36282e+06	890146	667644	695956	70894.4	84755.7
	P62399 [126-133]	GNYSMGVR	1xOxidation [M5]	0	2	450.206	23.2617	2	11.1	232.7	133.5	22.7	86951.5	112544	2.64409e+06	1.62955e+06	1.23178e+06	1.15241e+06	179171	229228
	P62399 [134-145]	EQIIFPEIDYDK		0	2	755.379	55.4662	4	21.1	261.8	103.6	13.5	125209	147589	1.82709e+06	1.55768e+06	655819	679831	79516.2	94701.3
	P62399 [134-148]	EQIIFPEIDYDKVDR		1	3	627.32	53.3083	10	34	201	139.6	25.4	398235	448528	2.84168e+06	2.1958e+06	1.62764e+06	1.84877e+06	357509	279468
	P62399 [15-30]	KLMTEFNYNSVMQVPR	1xOxidation [M3]	1	3	658.326	49.3907	1	20.6	199.1	157	23.4	25310.1	27717.4	285126	230722	206519	198084	20139.3	45217.3
	P62399 [15-30]	KLMTEFNYNSVMQVPR	2xOxidation [M3; M12]	1	3	663.657	43.0886	4	32.2	191.1	154.2	22.6	75013.3	104246	597493	461548	405769	442164	61115.3	62821.2
	P62399 [151-161]	GLDITITTTAK		0	2	567.325	44.4964	12	32.5	230	118.1	19.4	825442	742977	5908682	5.20386e+06	2818158	2.87865e+06	517893	423364
	P62399 [16-30]	LMTEFNYNSVMQVPR		0	2	914.94	56.254	4	36.7	187.5	150.8	25	61562.6	70339.8	386822	292580	242953	301190	55520	36341.1
	P62399 [16-30]	LMTEFNYNSVMQVPR	1xOxidation [M2]	0	2	922.938	53.3875	5	18.7	244.1	122.6	14.6	63893.8	43255.7	739316	637609	322437	368790	41089.2
	P62399 [16-30]	LMTEFNYNSVMQVPR	2xOxidation [M2; M11]	0	3	620.959	46.6726	6	18.2	250.1	115.7	16	100098	74868.1	1.30934e+06	1.08613e+06	530722	572792	78652	74437
	P62399 [168-178]	ALLAAFDFPFR		0	2	634.345	68.3568	4	41.1	232.2	111.7	15	64714	65496.3	389973	347531	165502	189422	28750.7	19601.9
	P62399 [168-179]	ALLAAFDFPFRK		1	2	698.393	60.5117	15	37.3	218.4	125.4	18.9	621171	700439	4.23541e+06	3.51664e+06	2.05548e+06	2.39101e+06	348947	319885
	P62399 [34-47]	ITLNMGVGEAIADK		0	2	716.378	50.8196	7	31.8	224.2	127.8	16.3	304013	261965	2125409	1.86655e+06	1.03215e+06	1.24944e+06	167705	124449
	P62399 [34-47]	ITLNMGVGEAIADK	1xOxidation [M5]	0	2	724.376	45.4685	9	23.1	242.2	121.6	13.2	282169	341254	3664273	2.89267e+06	1.67054e+06	1.59884e+06	173271	181390
	P62399 [34-48]	ITLNMGVGEAIADKK		1	3	520.621	46.5442	2	24.6	235.2	121.3	18.9	235521	254991	2571386	2.14293e+06	1.2358e+06	1.18629e+06	187140	190693
	P62399 [34-48]	ITLNMGVGEAIADKK	1xOxidation [M5]	1	3	525.952	41.0621	3	20.2	234.1	126.8	19	308992	336634	4.13202e+06	3.39439e+06	2.03152e+06	2.02412e+06	249869	368809
	P62399 [4-9]	LHDYYK		0	2	419.708	24.7418	1	26.3	276.2	80.7	16.8	203790	277059	3.11827e+06	1.99224e+06	695382	762621	143602	160743
	P62399 [48-69]	KLLDNAAADLAAISGQKPLITK		1	3	751.106	55.9864	5	34.1	202.5	142.5	20.9	301067	414638	2.31981e+06	1.89421e+06	1.32412e+06	1.64431e+06	221936	209951
	P62399 [49-69]	LLDNAAADLAAISGQKPLITK		0	3	708.408	57.2535	5	22.3	240.8	119.2	17.7	552832	694212	7.20642e+06	6.18685e+06	3.22537e+06	3.38863e+06	482665	497119
	P62399 [72-78]	KSVAGFK		1	2	368.721	21.7242	2	27	153.1	195.5	24.4	100571	174425	796077	708196	967282	949889	114527	124930
	P62399 [73-78]	SVAGFK		0	1	608.34	26.4863	2	11.5	278.8	90.7	19.1	9542.29	26385.3	426581	348721	119436	131753	26192.3	26602.2
	P62399 [81-88]	QGYPIGCK	1xCarbamidomethyl [C7]	0	2	461.726	29.2887	1	21.4	225.1	138.7	14.8	147623	278546	2488298	1.82542e+06	1.3202e+06	1.30586e+06	128412	153378
FALSE	C4ZT56	Peptide chain release factor 3 [OS=Escherichia coli BW2952]	54	22	22	59.5	5.97	111	321	37.7	33.9	7.4	4.86822e+07	5.76818e+07	7.28321e+06	5.30826e+06	5.41658e+06	5.77896e+06	1.3197e+06	1.12717e+06
	Positions in Master Proteins	Sequence	Modifications	# Missed Cleavages	PSM Charge (by Search Engine): Sequest HT	PSM m/z [Da] (by Search Engine): Sequest HT	PSM RT [min] (by Search Engine): Sequest HT	# PSMs	Abundances (Grouped): 1	Abundances (Grouped): 2	Abundances (Grouped): 3	Abundances (Grouped): 4	Abundance: F5: Sample, 1	Abundance: F6: Sample, 1	Abundance: F7: Sample, 2	Abundance: F8: Sample, 2	Abundance: F9: Sample, 3	Abundance: F10: Sample, 3	Abundance: F11: Sample, 4	Abundance: F12: Sample, 4
	C4ZT56 [102-117]	TLTAVDCCLMVIDAAK	2xCarbamidomethyl [C7; C8]	0	2	890.937	56.5165	2	256.8	18.7	24.5		808523	941810	65945.4	61450.1	76888.5	89824.5
	C4ZT56 [102-117]	TLTAVDCCLMVIDAAK	2xCarbamidomethyl [C7; C8]; 1xOxidation [M10]	0	2	898.932	53.1628	2	100					752625
	C4ZT56 [126-131]	LMEVTR	1xOxidation [M2]	0	2	382.702	23.2251	1	219.4	99.9	69.4	11.3	323310	343459	169905	135666	111483	99597.6	14844.9	19929.8
	C4ZT56 [132-143]	LRDTPILTFMNK		1	3	483.602	50.8982	4	252.6	24.5	22.9		1.11399e+06	1.34378e+06	154411	90850.5	109036	113311
	C4ZT56 [132-143]	LRDTPILTFMNK	1xOxidation [M10]	1	3	488.935	43.9666	3	311	44.4	37.2	7.5	1.86749e+06	2.12055e+06	312370	258040	239949	235930	45080.5	51017.3
	C4ZT56 [14-26]	RTFAIISHPDAGK		1	3	471.593	32.9531	2	310.9	45.2	35.1	8.8	297926	349216	51635.1	42644.9	34303.2	38614.7	7484.68	11206.8
	C4ZT56 [144-163]	LDRDIRDPMELLDEVENELK		2	4	611.309	70.1933	3	375.5	9.9	9.3	5.2	1.0949e+06	1.58247e+06	48804	24878.2	28983.8	36678.3	18373.5
	C4ZT56 [144-163]	LDRDIRDPMELLDEVENELK	1xOxidation [M9]	2	4	615.309	65.6871	2	244.4	30.6	24.9		234595	270110	32449.9	30628.5	29469.4	22382.1
	C4ZT56 [147-163]	DIRDPMELLDEVENELK		1	3	686.673	75.0708	2	322.4	44	24.6	8.9	684983	855319	115306	94830.1	55428.5	61628.1	22425.1	20004
	C4ZT56 [147-163]	DIRDPMELLDEVENELK	1xOxidation [M6]	1	3	692.002	69.6818	1	227.1	49.1	23.7		307517	406100	86774.2	67340.5	29150.6	46701.3
	C4ZT56 [15-26]	TFAIISHPDAGK		0	2	628.836	37.4944	12	316.9	38.6	35.4	9	5.79619e+06	6323602	818078	665433	627217	730228	159888	184624
	C4ZT56 [164-177]	IGCAPITWPIGCGK	2xCarbamidomethyl [C3; C12]	0	2	765.384	53.8065	4	230.3	22.4	47.3		943332	1.04935e+06	115502	80717.7	204436
	C4ZT56 [181-197]	GVYHLYKDETYLYQSGK		1	3	688.673	42.1364	4	353.9	9.8	26.8	9.6	2332834	2.55474e+06	78087	58391.2	177901	191502	72240.2	60765.5
	C4ZT56 [198-205]	GHTIQEVR		0	2	470.254	22.2431	6	287.3	58.3	45.9	8.6	1.96087e+06	3247239	554000	472540	390851	415005	72050.1	79432.6
	C4ZT56 [209-228]	GLNNPDLDAAVGEDLAQQLR		0	2	1055.03	59.8916	2	236.1	32.6	31.3		241506	264006	43526.7	27845.8	30805.4	36455.8
	C4ZT56 [288-302]	TVEASEDKFTGFVFK		1	3	568.952	50.805	4	337.5	18	36.1	8.4	6.66495e+06	7.05227e+06	427491	312627	674080	798187	175042	166315
	C4ZT56 [33-47]	VLLFGQAIQTAGTVK		0	2	773.453	56.203	9	318.6	39.1	34.8	7.5	9557008	10831666	1.42636e+06	1.09282e+06	1.04214e+06	1.18781e+06	267856	211619
	C4ZT56 [339-353]	DVVISDALTFMAGDR		0	2	805.399	67.3884	6	315.7	39.4	30.9	13.9	1.838e+06	2.64725e+06	431891	175846	214486	217747	112788	83763.4
	C4ZT56 [339-353]	DVVISDALTFMAGDR	1xOxidation [M11]	0	2	813.396	55.5411	2	270.7	61.8	44.7	22.8	497555	588799	156951	97107.5	83113.2	96292.6	62908.7	32910.3
	C4ZT56 [354-386]	SHVEEAYPGDILGLHNHGTIQIGDTFTQGEMMK	2xOxidation [M31; M32]	0	4	915.176	52.1145	2	142.4	117.9	39.7		379051	353800	339710	270828	107646	97093
	C4ZT56 [387-399]	FTGIPNFAPELFR		0	2	754.898	66.2748	6	329.1	32.3	30.2	8.4	1.9548e+06	2.36787e+06	251467	176938	181525	214905	63985	47235.5
	C4ZT56 [455-472]	SEYNVEAVYESVNVATAR		0	2	1000.98	55.7736	11	309.9	46.8	36.9	6.3	2.81493e+06	3.08828e+06	519800	382056	332871	370355	95571.8	37872.9
	C4ZT56 [473-480]	WVECADAK	1xCarbamidomethyl [C4]	0	2	489.721	28.9833	3	312.6	46.3	35.9	5.1	1.1286e+06	1.63187e+06	232828	173832	162268	149748	19922.5	24920.3
	C4ZT56 [488-512]	KNESQLALDGGDNLAYIATSMVNLR		1	3	898.454	67.2678	1	340.9	26.2	22.9	10.1	1135843	1.44506e+06	121353	79840.9	72818.6	101392	42406.3	33838.5
	C4ZT56 [488-512]	KNESQLALDGGDNLAYIATSMVNLR	1xOxidation [M21]	1	3	903.79	57.5535	3	307.5	45.9	41.1	5.6	724177	804458	138636	93454.6	96060.7	108153	13798
	C4ZT56 [489-512]	NESQLALDGGDNLAYIATSMVNLR		0	2	1283.14	72.1683	4	335.2	34.3	23.7	6.8	938050	1.14656e+06	129360	87165.4	70220.3	76451.6	23528.4	19029.1
	C4ZT56 [518-527]	YPDVQFHQTR		0	3	430.878	35.198	9	332.9	37.8	25.3	4	2.84818e+06	2.99978e+06	448801	245872	217992	225698	29502.6	42687.1
	C4ZT56 [57-64]	SDWMEMEK		0	2	528.212	43.1142	1	271.2	11	17.8		193038	319744	11771.5	8612.83	15460.3	17271.5
FALSE	P67087	Ribosomal RNA small subunit methyltransferase I [OS=Escherichia coli K-12]	76	17	17	31.3	6.24	108	60.2	165.3	140.1	34.5	5.60669e+06	6.5376e+06	1.86226e+07	1.48411e+07	1.36422e+07	1.45519e+07	3.50736e+06	3.43602e+06
	Positions in Master Proteins	Sequence	Modifications	# Missed Cleavages	PSM Charge (by Search Engine): Sequest HT	PSM m/z [Da] (by Search Engine): Sequest HT	PSM RT [min] (by Search Engine): Sequest HT	# PSMs	Abundances (Grouped): 1	Abundances (Grouped): 2	Abundances (Grouped): 3	Abundances (Grouped): 4	Abundance: F5: Sample, 1	Abundance: F6: Sample, 1	Abundance: F7: Sample, 2	Abundance: F8: Sample, 2	Abundance: F9: Sample, 3	Abundance: F10: Sample, 3	Abundance: F11: Sample, 4	Abundance: F12: Sample, 4
	P67087 [116-138]	VVPLPGPCAAITALSAAGLPSDR	1xCarbamidomethyl [C8]	0	3	745.072	65.8396	1	61.2	171.2	129.8	37.8	49207.5		146534	129266	89514.1	121724	32090.7	28766.8
	P67087 [158-164]	AIEAEPR		0	2	393.211	23.2803	4	23.9	203.6	141.6	30.9	73338.5	100710	810123	662373	544503	476607	105126	117693
	P67087 [165-174]	TLIFYESTHR		0	3	422.887	41.5333	8	68.3	163.2	135.9	32.6	340782	354139	916725	752966	691934	691869	165858	165607
	P67087 [175-190]	LLDSLEDIVAVLGESR		0	2	864.972	75.9061	14	85.2	144.4	135.1	35.3	533760	626441	1.21994e+06	788235	912935	921237	291754	197298
	P67087 [191-196]	YVVLAR		0	2	360.724	33.0394	6	63	181.9	127	28.2	275219	284232	921813	706472	556663	570142	121905	128133
	P67087 [226-236]	GEMVLIVEGHK		0	2	606.324	40.7703	5	71.7	149.6	152.4	26.4	252359	309942	662770	514252	539902	654981	103430	102269
	P67087 [237-248]	AQEEDLPADALR		0	2	664.328	40.1584	8	68.8	164.5	134.7	32	484962	556139	1404890	1.09797e+06	985674	1049921	237201	246627
	P67087 [249-260]	TLALLQAELPLK		0	2	655.408	60.1405	4	54.8	167.8	144.6	32.8	172251	191359	644425	478955	429679	533956	107748	109261
	P67087 [249-261]	TLALLQAELPLKK		1	3	479.972	52.9481	13	59.5	150.5	148.6	41.3	598125	636626	1.71005e+06	1.42325e+06	1.45997e+06	1.62496e+06	450071	407321
	P67087 [262-273]	AAALAAEIHGVK		0	2	575.832	35.4361	6	57.1	191.9	128.5	22.6	167694	183412	682554	508965	376532	413743	69585.9	69035
	P67087 [262-274]	AAALAAEIHGVKK		1	3	426.922	30.9981	2	68.4	154.8	139.4	37.4	197078	197793	496453	402698	436216	371340	102604	113838
	P67087 [3-30]	QHQSADNSQGQLYIVPTPIGNLADITQR		0	3	1022.19	59.3835	7	67.1	165.2	127.5	40.3	333719	335541	958671	708517	585135	691086	220255	183373
	P67087 [31-47]	ALEVLQAVDLIAAEDTR		0	2	913.996	70.1564	13	78.1	143.2	141.7	37.1	707091	866770	1.88005e+06	1.09624e+06	1.26838e+06	1.59071e+06	378747	365033
	P67087 [48-61]	HTGLLLQHFGINAR		0	3	526.295	46.1934	1	32	190.2	146.6	31.2		316987	2.04155e+06	1.74467e+06	1.42436e+06	1.48581e+06	269836	354500
	P67087 [62-73]	LFALHDHNEQQK		0	3	493.916	29.1852	1	62.6	172.4	134.3	30.8	437527	505067	1.33763e+06	1.2543e+06	1.00589e+06	1.01174e+06	217921	245728
	P67087 [74-80]	AETLLAK		0	2	373.226	29.5063	7	55.5	182.6	136.8	25.2	222658	252442	825408	737709	588702	580512	98148.1	117747
	P67087 [81-107]	LQEGQNIALVSDAGTPLINDPGYHLVR		0	3	964.174	55.8186	8	63.8	153.3	141.7	41.1	760920	819997	1.96305e+06	1.83426e+06	1.74621e+06	1.76157e+06	535078	483795
FALSE	C4ZUH4	Large ribosomal subunit protein uL4 [OS=Escherichia coli BW2952]	55	11	11	22.1	9.73	106	1.5	259.1	120.5	18.8	1.19937e+06	1.6306e+06	2.65131e+08	2.12678e+08	1.08003e+08	1.12884e+08	1.70753e+07	1.74616e+07
	Positions in Master Proteins	Sequence	Modifications	# Missed Cleavages	PSM Charge (by Search Engine): Sequest HT	PSM m/z [Da] (by Search Engine): Sequest HT	PSM RT [min] (by Search Engine): Sequest HT	# PSMs	Abundances (Grouped): 1	Abundances (Grouped): 2	Abundances (Grouped): 3	Abundances (Grouped): 4	Abundance: F5: Sample, 1	Abundance: F6: Sample, 1	Abundance: F7: Sample, 2	Abundance: F8: Sample, 2	Abundance: F9: Sample, 3	Abundance: F10: Sample, 3	Abundance: F11: Sample, 4	Abundance: F12: Sample, 4
	C4ZUH4 [1-6]	MELVLK		0	2	366.719	41.4387	6	0.8	235.4	140	23.8	22252.9		8845361	5479245	4.1223e+06	4156804	697843	712582
	C4ZUH4 [1-6]	MELVLK	1xOxidation [M1]	0	2	374.717	33.4495	6	5.3	273	103.8	17.8	186348	256865	12821086	9969326	4.31808e+06	4.28242e+06	701558	778184
	C4ZUH4 [107-114]	SILSELVR		0	2	458.777	55.9233	6	0.8	264.7	118	16.5	81014.3	100466	32554186	28948884	13097552	14303955	1.83874e+06	1.98611e+06
	C4ZUH4 [118-123]	LIVVEK		0	2	350.733	31.0878	7	2	270.1	113	14.9	128002	199305	24340608	19665096	9123376	9189201	1.08998e+06	1.33165e+06
	C4ZUH4 [124-130]	FSVEAPK		0	2	389.21	33.8884	7	4.4	273.8	107	14.7	262800	379789	21688698	17457606	7.82762e+06	7.38919e+06	971905	1.12421e+06
	C4ZUH4 [171-185]	DATGIDPVSLIAFDK		0	2	781.411	63.5895	9	0.7	256	124.9	18.4	97411.2	96079.7	39484888	28779040	15368633	17606968	2.5173e+06	2.32534e+06
	C4ZUH4 [186-194]	VVMTADAVK		0	2	467.257	30.7423	5		200.9	87.6	11.5			20910794	15803379	7945708	7906249	923966	1173264
	C4ZUH4 [186-194]	VVMTADAVK	1xOxidation [M3]	0	2	475.254	23.841	13	1.4	258.9	118.7	21	56642.4	184746	20877286	17318103	9071689	8.37718e+06	1.35188e+06	1.76502e+06
	C4ZUH4 [22-40]	DFNEALVHQVVVAYAAGAR		0	3	677.355	64.8502	15	1.3	238.2	136	24.5	126520	118043	2.57069e+07	1.98993e+07	1.21726e+07	1.36874e+07	2.68037e+06	2.01991e+06
	C4ZUH4 [48-57]	TRAEVTGSGK		1	2	503.269	17.7258	3	1.5	245.9	129.6	23		24968.8	4.50167e+06	3.94486e+06	2.26663e+06	2.17699e+06	375493	415182
	C4ZUH4 [50-57]	AEVTGSGK		0	2	374.695	17.6812	2		200.1	90	10			1.94695e+06	2230878	904742	970427	93500.6	115193
	C4ZUH4 [7-21]	DAQSALTVSETTFGR		0	2	791.891	47.8451	13	1.3	264.8	115.5	18.3	155456	178038	3.57761e+07	3.08645e+07	1.41824e+07	1.48219e+07	2.37242e+06	2.22126e+06
	C4ZUH4 [80-95]	SGGVTFAARPQDHSQK		0	3	562.617	26.7165	14	1.5	238.9	134.2	25.4	82921.3	92297.5	1.56765e+07	1.23177e+07	7.60143e+06	8015718	1.46032e+06	1.49372e+06
FALSE	C4ZR80	Large ribosomal subunit protein bL9 [OS=Escherichia coli BW2952]	68	11	11	15.8	6.58	99	4.2	175.3	106.2	114.2	3.6905e+06	3.40585e+06	1.60714e+08	1.33225e+08	8.72783e+07	9.00828e+07	9.2438e+07	9.82288e+07
	Positions in Master Proteins	Sequence	Modifications	# Missed Cleavages	PSM Charge (by Search Engine): Sequest HT	PSM m/z [Da] (by Search Engine): Sequest HT	PSM RT [min] (by Search Engine): Sequest HT	# PSMs	Abundances (Grouped): 1	Abundances (Grouped): 2	Abundances (Grouped): 3	Abundances (Grouped): 4	Abundance: F5: Sample, 1	Abundance: F6: Sample, 1	Abundance: F7: Sample, 2	Abundance: F8: Sample, 2	Abundance: F9: Sample, 3	Abundance: F10: Sample, 3	Abundance: F11: Sample, 4	Abundance: F12: Sample, 4
	C4ZR80 [1-8]	MQVILLDK		0	2	480.284	46.9265	7	2.3	154.4	121.1	122.1	83743.6	108391	7.317e+06	5371945	4827278	5.00871e+06	4.89168e+06	5023462
	C4ZR80 [1-8]	MQVILLDK	1xOxidation [M1]	0	2	488.281	40.4202	8	6	188.6	104.4	101.1	225194	250374	8.0641e+06	6920387	4089575	4.17788e+06	3.80528e+06	4.21057e+06
	C4ZR80 [117-123]	LPNGVLR		0	2	384.74	34.3964	4	3.1	191.3	100.8	104.9	119749	124876	8.22514e+06	7034862	3.79826e+06	4.23265e+06	3.91022e+06	4447568
	C4ZR80 [124-141]	TTGEHEVSFQVHSEVFAK		0	3	677.996	40.8257	29	20.6	152.4	108.6	118.4	1.20916e+06	876254	8.23629e+06	7.05411e+06	5.66389e+06	5.20638e+06	5622162	6.23521e+06
	C4ZR80 [42-50]	KNIEFFEAR		1	2	577.304	40.6928	7	3.7	139.5	109.5	147.3	76122.7	81754	3.11489e+06	2.8068e+06	2.10994e+06	2.55172e+06	3.17392e+06	3.07173e+06
	C4ZR80 [43-50]	NIEFFEAR		0	2	513.257	48.8336	4	3	184.9	96.5	115.6	186765	164518	11507891	10294209	5.56217e+06	5.79604e+06	6.7491e+06	6857815
	C4ZR80 [58-68]	LAEVLAAANAR		0	2	549.818	39.0837	5	3.3	181.7	107.2	107.7	395380	484578	26818214	21993112	14400311	14259888	13683930	15150382
	C4ZR80 [72-83]	INALETVTIASK		0	2	630.364	46.2365	9	2.7	178.7	105.9	112.7	359282	376887	26782160	21619816	13939015	14577129	14791094	15559328
	C4ZR80 [9-22]	VANLGSLGDQVNVK		0	2	707.389	43.8862	8	2.7	181	105.8	110.6	294258	348789	23142992	19759852	12513976	12483803	12602391	13549381
	C4ZR80 [90-112]	LFGSIGTRDIADAVTAAGVEVAK		1	3	754.411	61.6352	1	100				258017
	C4ZR80 [90-97]	LFGSIGTR		0	2	425.744	39.7631	2	3.8	180.7	102.5	113	257024	288693	14991750	11474686	7516531	7365035	8027331	8372196
	C4ZR80 [98-112]	DIADAVTAAGVEVAK		0	2	715.38	51.6772	15	2.1	165.1	109	123.8	225808	300742	2.25132e+07	1.88953e+07	1.28573e+07	1.44236e+07	1.51809e+07	1.57512e+07
FALSE	P0A7K2	Large ribosomal subunit protein bL12 [OS=Escherichia coli K-12]	82	11	11	12.3	4.65	91	59.6	187.2	95.2	58.1	3.29479e+07	3.79477e+07	1.22941e+08	1.00374e+08	5.45998e+07	5.84537e+07	3.28981e+07	3.60817e+07
	Positions in Master Proteins	Sequence	Modifications	# Missed Cleavages	PSM Charge (by Search Engine): Sequest HT	PSM m/z [Da] (by Search Engine): Sequest HT	PSM RT [min] (by Search Engine): Sequest HT	# PSMs	Abundances (Grouped): 1	Abundances (Grouped): 2	Abundances (Grouped): 3	Abundances (Grouped): 4	Abundance: F5: Sample, 1	Abundance: F6: Sample, 1	Abundance: F7: Sample, 2	Abundance: F8: Sample, 2	Abundance: F9: Sample, 3	Abundance: F10: Sample, 3	Abundance: F11: Sample, 4	Abundance: F12: Sample, 4
	P0A7K2 [102-108]	DDAEALK		0	2	381.187	23.1374	6	13.3	232.4	108.8	45.5	111612	143450	2345369	2.07274e+06	1.06704e+06	998409	400054	465465
	P0A7K2 [102-109]	DDAEALKK		1	2	445.234	20.425	1	16	224.6	114.4	45	898661	1356601	16502591	14638764	7620807	8.23019e+06	2767332	3.50752e+06
	P0A7K2 [109-121]	KALEEAGAEVEVK		1	3	458.249	32.1299	17	60	164.9	108.6	66.5	1.447e+06	1.97852e+06	5.07402e+06	4.25483e+06	2.95272e+06	3.17292e+06	1.8596e+06	1.88566e+06
	P0A7K2 [110-121]	ALEEAGAEVEVK		0	2	622.823	35.3493	9	69.3	175.4	91.5	63.8	8272153	9158057	24988852	19409896	11282725	11685032	7.73454e+06	8.29401e+06
	P0A7K2 [31-52]	FGVSAAAAVAVAAGPVEAAEEK		0	3	672.353	58.7991	20	50.7	204.1	106.4	38.7	638398	544101	2.47644e+06	2.26943e+06	1.0915e+06	1.40061e+06	527315	383446
	P0A7K2 [53-60]	TEFDVILK		0	2	482.772	49.0506	4	33.3	255.3	80.4	31	2914559	2.99166e+06	24900654	20533972	6855892	7396987	2.7523e+06	2.7361e+06
	P0A7K2 [6-30]	DQIIEAVAAMSVMDVVELISAMEEK	2xOxidation [M10; M13]	0	3	918.452	90.2742	6	9.1		190.9			3841.21				80951.3
	P0A7K2 [6-30]	DQIIEAVAAMSVMDVVELISAMEEK	3xOxidation [M10; M13; M22]	0	3	923.785	90.2699	1	134.6	59.9		105.5	15707.2	30467.3		9731.44			19481.3	15090.6
	P0A7K2 [75-82]	GATGLGLK		0	2	358.718	29.8402	4	67.1	176.2	96.1	60.6	2.82217e+06	3.2899e+06	8613612	7423159	4.22154e+06	4.51087e+06	2.44495e+06	3.09423e+06
	P0A7K2 [86-96]	DLVESAPAALK		0	2	557.311	41.9864	11	71.2	178.3	93.6	56.9	12323141	14636417	38039812	29761558	16818140	18527700	10466770	11024435
	P0A7K2 [97-108]	EGVSKDDAEALK		1	3	421.214	27.6066	7	101.1		87.8	111	608402	693501			605246	525874	637709	797519
	P0A7K2 [97-109]	EGVSKDDAEALKK		2	3	463.912	24.6948	5	105.1		70	124.9	2.89614e+06	3.1212e+06			2.08423e+06	1.92412e+06	3.288e+06	3.87824e+06
FALSE	P0A7V8	Small ribosomal subunit protein uS4 [OS=Escherichia coli K-12]	59	14	14	23.5	10.05	91	30.5	223.4	106.3	39.9	5.18777e+06	5.51212e+06	4.41624e+07	3.48192e+07	1.77453e+07	1.96205e+07	6.9798e+06	7.03063e+06
	Positions in Master Proteins	Sequence	Modifications	# Missed Cleavages	PSM Charge (by Search Engine): Sequest HT	PSM m/z [Da] (by Search Engine): Sequest HT	PSM RT [min] (by Search Engine): Sequest HT	# PSMs	Abundances (Grouped): 1	Abundances (Grouped): 2	Abundances (Grouped): 3	Abundances (Grouped): 4	Abundance: F5: Sample, 1	Abundance: F6: Sample, 1	Abundance: F7: Sample, 2	Abundance: F8: Sample, 2	Abundance: F9: Sample, 3	Abundance: F10: Sample, 3	Abundance: F11: Sample, 4	Abundance: F12: Sample, 4
	P0A7V8 [105-111]	MGFGATR	1xOxidation [M1]	0	2	378.179	24.5988	3	3.3	239.8	119.5	37.4	7475.66	19261.9	966880	767266	451032	408403	123846	145379
	P0A7V8 [116-121]	QLVSHK		0	2	356.21	18.0769	2		193	88.3	18.7			950105	766684	394047	387178	80553.5	84621.7
	P0A7V8 [122-128]	AIMVNGR		0	2	380.71	26.754	3		194.5	81.6	23.9			476835	350961	161791	181830	45579.7	55488.6
	P0A7V8 [129-146]	VVNIASYQVSPNDVVSIR		0	2	980.53	53.8461	6	2.9	259.1	106	32.1	35272.8		3.50907e+06	2.87788e+06	1.19409e+06	1.41529e+06	393492	392784
	P0A7V8 [157-165]	AALELAEQR		0	2	500.775	35.3194	8	7.9	262.1	101.7	28.3	206486	292568	9412664	7.10302e+06	3.16776e+06	3178359	855310	908965
	P0A7V8 [178-183]	MEGTFK	1xOxidation [M1]	0	2	364.668	21.7634	4	4.9	253.3	106.7	35.1	24612.5	28045.7	1.47999e+06	1.27134e+06	638263	523133	180527	200185
	P0A7V8 [189-206]	SDLSADINEHLIVELYSK		0	3	682.685	60.7551	21	165.4	62.8	79.3	92.5	4.34905e+06	4.48138e+06	2.16384e+06	1.29837e+06	1.48067e+06	3.02503e+06	2.69776e+06	2.25802e+06
	P0A7V8 [34-44]	IEQAPGQHGAR		0	3	388.535	20.1879	18	2.1	262	107	29	17016.8	43928.7	3.83679e+06	3.15995e+06	1.41611e+06	1.42661e+06	353650	418709
	P0A7V8 [48-56]	LSDYGVQLR		0	2	525.782	40.7365	3	5.9	236.1	125.5	32.4	152051	187776	7468481	6.04481e+06	3.60458e+06	3.54059e+06	813461	1.04619e+06
	P0A7V8 [63-70]	RIYGVLER		1	2	503.296	34.2299	1	6.9	248.9	112.3	31.9	64889.3	63471.4	2633600	2031321	1.01947e+06	1.06854e+06	292117	301779
	P0A7V8 [64-70]	IYGVLER		0	2	425.245	38.818	4	11.5	244.1	113.7	30.8	89107.3	102133	2.30842e+06	1.78147e+06	940741	947902	252368	258770
	P0A7V8 [82-97]	LKGNTGENLLALLEGR		1	2	849.481	61.8131	8	7.6	230.7	124.9	36.9	88774.2	82243.1	2.91407e+06	2.3356e+06	1290225	1.54582e+06	412810	421399
	P0A7V8 [84-97]	GNTGENLLALLEGR		0	2	728.892	66.5498	5	6.2	298.3	76.6	18.8	34505.9	32206.7	1.67267e+06	1.53744e+06	393433	431379	101775	100890
	P0A7V8 [98-104]	LDNVVYR		0	2	439.741	32.2748	5	9.7	259.4	104	26.9	118531	179109	4368977	3.49312e+06	1.59311e+06	1.54048e+06	376550	437443
FALSE	B1XHK3	Small ribosomal subunit protein uS9 [OS=Escherichia coli str. K-12 substr. DH10B]	65	10	10	14.8	10.95	89	5.3	272.3	102.7	19.6	1.66988e+06	2.11579e+06	1.06247e+08	8.76394e+07	3.40314e+07	3.8934e+07	6.78272e+06	7.1198e+06
	Positions in Master Proteins	Sequence	Modifications	# Missed Cleavages	PSM Charge (by Search Engine): Sequest HT	PSM m/z [Da] (by Search Engine): Sequest HT	PSM RT [min] (by Search Engine): Sequest HT	# PSMs	Abundances (Grouped): 1	Abundances (Grouped): 2	Abundances (Grouped): 3	Abundances (Grouped): 4	Abundance: F5: Sample, 1	Abundance: F6: Sample, 1	Abundance: F7: Sample, 2	Abundance: F8: Sample, 2	Abundance: F9: Sample, 3	Abundance: F10: Sample, 3	Abundance: F11: Sample, 4	Abundance: F12: Sample, 4
	B1XHK3 [101-106]	AGFVTR		0	2	325.685	26.4542	6	3.6	277.6	100	18.7	48502.6	83731.5	5322223	4.4585e+06	1.7964e+06	1.71447e+06	299903	360698
	B1XHK3 [19-27]	VFIKPGNGK		0	3	320.528	25.042	7	8.2	274.5	100.7	16.6	118469	151867	4960344	4.06099e+06	1658785	1.63464e+06	239158	309430
	B1XHK3 [2-11]	AENQYYGTGR		0	2	579.763	27.0648	6	2.8	282.5	97	17.7	72785.8	132914	11621997	8.36597e+06	3.42339e+06	3.34695e+06	553711	691747
	B1XHK3 [28-33]	IVINQR		0	2	371.731	26.4479	6	2.7	295.5	86.2	15.6	89581.3	169449	14396275	12757839	4.04305e+06	3.86514e+06	656336	783841
	B1XHK3 [34-41]	SLEQYFGR		0	2	500.248	46.7452	10	6.7	260.7	109.6	23	347359	420265	17265454	12977756	5958188	6641321	1.33661e+06	1306550
	B1XHK3 [50-60]	QPLELVDMVEK		0	2	650.845	54.1129	6	3.8	281.7	98.8	15.7	121688	133141	10134295	8872969	3.04064e+06	3.63811e+06	540105	515628
	B1XHK3 [50-60]	QPLELVDMVEK	1xOxidation [M8]	0	2	658.843	46.5526	8	4.8	280.7	99.8	14.7	195388	248892	1.38894e+07	1.18395e+07	4.41357e+06	4.71069e+06	654335	689838
	B1XHK3 [61-68]	LDLYITVK		0	2	482.789	50.5683	14	10.7	221.9	130.8	36.7	309511	321052	6.07022e+06	7.03367e+06	2.66787e+06	5.55807e+06	1.11508e+06	1.04559e+06
	B1XHK3 [69-80]	GGGISGQAGAIR		0	2	522.284	29.5244	4
	B1XHK3 [86-95]	ALMEYDESLR		0	2	613.79	43.36	6	5.1	270	104	20.8	78135	98613.8	5269484	4.13916e+06	1.76185e+06	1.83726e+06	364518	356684
	B1XHK3 [86-95]	ALMEYDESLR	1xOxidation [M3]	0	2	621.787	37.7666	14	5.9	274.2	101.5	18.5	288457	355864	17154176	13009201	5.18045e+06	5.90094e+06	990139	1.02659e+06
	B1XHK3 [86-99]	ALMEYDESLRSELR	1xOxidation [M3]	1	3	576.614	43.5245	2		162.8	99.4	37.8			163346	123832	87219.8	86399.4	32829.7	33196.9
FALSE	C4ZUG9	Small ribosomal subunit protein uS3 [OS=Escherichia coli BW2952]	65	14	14	26	10.27	89	7.4	266.7	105.6	20.4	2.38552e+06	2.68062e+06	1.00872e+08	8.34136e+07	3.57903e+07	3.68382e+07	6.8714e+06	7.15101e+06
	Positions in Master Proteins	Sequence	Modifications	# Missed Cleavages	PSM Charge (by Search Engine): Sequest HT	PSM m/z [Da] (by Search Engine): Sequest HT	PSM RT [min] (by Search Engine): Sequest HT	# PSMs	Abundances (Grouped): 1	Abundances (Grouped): 2	Abundances (Grouped): 3	Abundances (Grouped): 4	Abundance: F5: Sample, 1	Abundance: F6: Sample, 1	Abundance: F7: Sample, 2	Abundance: F8: Sample, 2	Abundance: F9: Sample, 3	Abundance: F10: Sample, 3	Abundance: F11: Sample, 4	Abundance: F12: Sample, 4
	C4ZUG9 [108-114]	KPELDAK		0	2	400.729	20.0323	1	2.5	274.8	104.2	18.5	27595.3	47776.7	4.09635e+06	3774256	1468946	1514296	236611	294828
	C4ZUG9 [115-126]	LVADSITSQLER		0	2	666.362	46.3237	8	6.2	271.9	103.5	18.4	451623	510229	22585802	19490340	8.01212e+06	7961579	1.37301e+06	1.46928e+06
	C4ZUG9 [12-27]	LGIVKPWNSTWFANTK		0	3	621.337	55.8235	3	12.5	238.7	116.3	32.5	121582	100690	2.36159e+06	1.89124e+06	981138	1.08049e+06	329063	251650
	C4ZUG9 [136-143]	RAVQNAMR		1	2	473.256	19.8232	1	1.6	278.7	103.7	16.1	8247.15		1.63191e+06	1.30425e+06	507548	580907	70918.4	99741.6
	C4ZUG9 [137-143]	AVQNAMR		0	2	395.206	21.4576	4		217.4	71.9	10.7			1.62369e+06	1403502	528499	471255	64133.1	85724.9
	C4ZUG9 [157-164]	LGGAEIAR		0	2	393.727	27.8057	6	8.3	257.4	113	21.4	171954	321350	8571906	6245873	3342854	3.0856e+06	554802	665041
	C4ZUG9 [173-179]	VPLHTLR		0	2	418.261	27.0551	3	8.5	280.3	94.3	16.9	136408	140513	4.53166e+06	4.60501e+06	1.57686e+06	1.49769e+06	263674	288271
	C4ZUG9 [180-199]	ADIDYNTSEAHTTYGVIGVK		0	3	718.684	43.6557	9	9.6	263.1	105.7	21.6	457194	411764	1.32165e+07	1.06634e+07	4.73342e+06	4.8067e+06	996133	949281
	C4ZUG9 [205-225]	GEILGGMAAVEQPEKPAAQPK		0	3	707.704	42.8378	6	6.7	276.8	101.2	15.3	78487	88464.3	3994877	2.99482e+06	1.22962e+06	1.30078e+06	189270	192268
	C4ZUG9 [205-225]	GEILGGMAAVEQPEKPAAQPK	1xOxidation [M7]	0	3	713.035	35.9864	9	9.2	282.9	90.6	17.3	172561	226079	6882143	5.35329e+06	1.9358e+06	1950000	361433	383196
	C4ZUG9 [28-38]	EFADNLDSDFK		0	2	650.789	47.0458	6	9.5	252.4	115.4	22.7	347880	384427	10278800	9243614	4231711	4.69475e+06	863652	892596
	C4ZUG9 [55-62]	IVIERPAK		0	2	463.295	27.5533	1	9.1	275.9	98.2	16.9	68877.6	80459.8	2.41355e+06	2.13223e+06	791323	824466	131955	145792
	C4ZUG9 [66-79]	VTIHTARPGIVIGK		0	3	487.968	35.6968	17	8.1	269.1	97.4	25.4	121874	118435	4.57652e+06	3447777	1.44607e+06	1.42863e+06	332086	423485
	C4ZUG9 [89-107]	KVVADIAGVPAQINIAEVR		1	3	655.049	51.9937	5		145.1	126.3	28.6			1.99213e+06	1.7202e+06	1.43562e+06	1.81033e+06	387443	344412
	C4ZUG9 [90-107]	VVADIAGVPAQINIAEVR		0	2	918.024	56.4081	10	6.2	277.9	97.6	18.2	221240	250433	1.21148e+07	9143849	3.56876e+06	3.8307e+06	717214	665441
FALSE	P0A7D1	Peptidyl-tRNA hydrolase [OS=Escherichia coli K-12]	71	11	11	21.1	9	83	198	119	63.9	19.2	4.24728e+07	4.73985e+07	3.00389e+07	2.42062e+07	1.41736e+07	1.47791e+07	4.31911e+06	4.38863e+06
	Positions in Master Proteins	Sequence	Modifications	# Missed Cleavages	PSM Charge (by Search Engine): Sequest HT	PSM m/z [Da] (by Search Engine): Sequest HT	PSM RT [min] (by Search Engine): Sequest HT	# PSMs	Abundances (Grouped): 1	Abundances (Grouped): 2	Abundances (Grouped): 3	Abundances (Grouped): 4	Abundance: F5: Sample, 1	Abundance: F6: Sample, 1	Abundance: F7: Sample, 2	Abundance: F8: Sample, 2	Abundance: F9: Sample, 3	Abundance: F10: Sample, 3	Abundance: F11: Sample, 4	Abundance: F12: Sample, 4
	P0A7D1 [124-132]	LGNNPNFHR		0	2	534.771	25.8102	1	220.4	106.6	58	15	711343	707286	364048	323118	210488	165519	44264.6	52314.1
	P0A7D1 [146-160]	VVGFVLGKPPVSEQK		0	3	528.643	44.5406	13	202.8	116.4	62.4	18.5	6.25243e+06	6.45633e+06	3.85835e+06	3.44432e+06	2.03243e+06	1.87841e+06	551018	607905
	P0A7D1 [161-171]	LIDEAIDEAAR		0	2	608.313	41.39	7	190.3	129.4	62.6	17.8	7990443	9490950	6.64102e+06	5277561	2.81998e+06	2906677	847142	784981
	P0A7D1 [172-183]	CTEMWFTDGLTK	1xCarbamidomethyl [C1]	0	2	744.828	56.2123	2	249.6	76	60	14.4	321078	379026	107136	105203	90109.5	78062.7	20093.7
	P0A7D1 [172-183]	CTEMWFTDGLTK	1xCarbamidomethyl [C1]; 1xOxidation [M4]	0	2	752.827	51.6989	7	211.8	105.4	66.4	16.5	664668	731830	375080	321187	195654	244356	45865.3	64098
	P0A7D1 [21-34]	HNAGAWFVDLLAER		0	3	533.608	63.8219	5	195.6	136	45.1	23.3	274070	332797	255005	172948	64258.9	75565	44413.6	29275.7
	P0A7D1 [45-51]	FFGYTSR		0	2	439.214	40.807	3	215.6	105.3	60.6	18.4	2.88104e+06	3290459	1.76131e+06	1.28494e+06	846218	886251	248412	277711
	P0A7D1 [5-20]	LIVGLANPGAEYAATR		0	2	808.445	49.5211	8	199	116.1	64.2	20.6	5.65633e+06	5.83188e+06	3.80241e+06	2.95365e+06	1.81012e+06	1.89764e+06	623283	568399
	P0A7D1 [52-60]	VTLGGEDVR		0	2	473.254	33.1666	8	192.2	128.1	61.7	18.1	4953285	5629605	4015923	3.08381e+06	1.76411e+06	1.62797e+06	462223	532912
	P0A7D1 [61-73]	LLVPTTFMNLSGK		0	2	710.897	60.1831	7	213	101.9	65.1	19.9	2.33788e+06	2.80813e+06	1.28778e+06	1.16718e+06	739862	828816	231709	248161
	P0A7D1 [61-73]	LLVPTTFMNLSGK	1xOxidation [M8]	0	2	718.894	53.6474	5	186.7	119.6	71.4	22.3	4.05404e+06	4.54794e+06	3.04122e+06	2.48597e+06	1.48572e+06	1.814e+06	519386	504847
	P0A7D1 [74-83]	AVAAMASFFR		0	2	535.777	54.4855	3	215	103.8	63	18.1	2.08693e+06	2.29106e+06	1.15631e+06	964528	584360	702696	177447	191493
	P0A7D1 [74-83]	AVAAMASFFR	1xOxidation [M5]	0	2	543.774	43.3233	7	190.8	123.4	65.6	20.3	2.48419e+06	2886748	1.92452e+06	1.55848e+06	909440	933314	265304	304825
	P0A7D1 [84-104]	INPDEILVAHDELDLPPGVAK		0	3	752.403	57.1295	7	188.1	122.4	66.8	22.7	1.8051e+06	2.01443e+06	1.44875e+06	1.06327e+06	620859	739775	238546	221704
FALSE	P0A7J3	Large ribosomal subunit protein uL10 [OS=Escherichia coli K-12]	64	10	10	17.7	8.98	82	31.4	212.9	102.3	53.4	9.02966e+06	1.02197e+07	7.18702e+07	5.88974e+07	3.008e+07	3.24869e+07	1.57354e+07	1.69488e+07
	Positions in Master Proteins	Sequence	Modifications	# Missed Cleavages	PSM Charge (by Search Engine): Sequest HT	PSM m/z [Da] (by Search Engine): Sequest HT	PSM RT [min] (by Search Engine): Sequest HT	# PSMs	Abundances (Grouped): 1	Abundances (Grouped): 2	Abundances (Grouped): 3	Abundances (Grouped): 4	Abundance: F5: Sample, 1	Abundance: F6: Sample, 1	Abundance: F7: Sample, 2	Abundance: F8: Sample, 2	Abundance: F9: Sample, 3	Abundance: F10: Sample, 3	Abundance: F11: Sample, 4	Abundance: F12: Sample, 4
	P0A7J3 [110-125]	AAAFEGELIPASQIDR		0	2	844.437	51.2279	6	34	191.8	111.9	62.3	1.69279e+06	2.00508e+06	1.12785e+07	9.56251e+06	5.53029e+06	6.6443e+06	3.35626e+06	3.39205e+06
	P0A7J3 [126-138]	LATLPTYEEAIAR		0	2	724.393	49.7663	13	31.4	210.3	99.5	58.8	1.15128e+06	1.16104e+06	8761383	6841839	3.52424e+06	3.80512e+06	2.18688e+06	2.14344e+06
	P0A7J3 [139-144]	LMATMK		0	2	347.685	27.561	4	36	201.2	99.9	63	63138.5	130275	616415	417875	258618	245349	144602	174705
	P0A7J3 [2-8]	ALNLQDK		0	2	401.227	28.9444	8	26.9	237.6	92.3	43.2	585388	821757	6861049	5467895	2.39625e+06	2359800	1.01159e+06	1224002
	P0A7J3 [21-31]	GALSAVVADSR		0	2	523.286	38.9509	3	32.6	212.4	101.4	53.7	2.02788e+06	2.27695e+06	15206338	12919721	6.43423e+06	6.9583e+06	3426826	3.66946e+06
	P0A7J3 [47-53]	EAGVYMR		0	2	413.2	28.9617	4	30.4	228	93.2	48.4	140609	224455	1.60124e+06	1.1099e+06	542434	547605	251683	318833
	P0A7J3 [47-53]	EAGVYMR	1xOxidation [M6]	0	2	421.197	23.2772	1	27.8		171.5	100.6	88710.8	91311.5				555004	311907	339844
	P0A7J3 [62-73]	RAVEGTPFECLK	1xCarbamidomethyl [C10]	1	3	469.574	39.704	7	23.8	242.4	96	37.8	186007	194631	2.30625e+06	1.63321e+06	757403	780378	273452	335471
	P0A7J3 [63-73]	AVEGTPFECLK	1xCarbamidomethyl [C9]	0	2	625.809	44.7731	7	25.3	238.4	98.4	37.9	538150	569419	5.68378e+06	4.79733e+06	2.19503e+06	2.1153e+06	794705	869396
	P0A7J3 [74-94]	DAFVGPTLIAYSMEHPGAAAR		0	3	725.36	60.2671	10	39	183.5	114.3	63.1	164666	197827	992506	725262	493350	566360	276942	307095
	P0A7J3 [74-94]	DAFVGPTLIAYSMEHPGAAAR	1xOxidation [M13]	0	3	730.693	53.2313	8	30.2	206.3	108	55.5	254398	274538	2.08417e+06	1.56182e+06	941776	947960	479584	490385
	P0A7J3 [9-20]	QAIVAEVSEVAK		0	2	622.349	44.4385	11	31.8	217.9	100.7	49.7	2.13664e+06	2.27243e+06	1.64786e+07	1.38601e+07	7.00638e+06	6.96145e+06	3.22096e+06	3.68408e+06
FALSE	P0A7S9	Small ribosomal subunit protein uS13 [OS=Escherichia coli K-12]	67	9	9	13.1	10.78	81	13.4	254.7	104.8	27.2	4.17476e+06	4.49412e+06	8.85827e+07	7.62979e+07	3.3799e+07	3.38382e+07	8.76798e+06	8.76492e+06
	Positions in Master Proteins	Sequence	Modifications	# Missed Cleavages	PSM Charge (by Search Engine): Sequest HT	PSM m/z [Da] (by Search Engine): Sequest HT	PSM RT [min] (by Search Engine): Sequest HT	# PSMs	Abundances (Grouped): 1	Abundances (Grouped): 2	Abundances (Grouped): 3	Abundances (Grouped): 4	Abundance: F5: Sample, 1	Abundance: F6: Sample, 1	Abundance: F7: Sample, 2	Abundance: F8: Sample, 2	Abundance: F9: Sample, 3	Abundance: F10: Sample, 3	Abundance: F11: Sample, 4	Abundance: F12: Sample, 4
	P0A7S9 [14-27]	HAVIALTSIYGVGK		0	2	714.914	48.5417	15	10.8	253.8	108	27.4	483744	521696	11627425	1.19172e+07	5226935	4.80189e+06	1325463	1.21783e+06
	P0A7S9 [32-44]	AILAAAGIAEDVK		0	2	621.361	47.8896	8	15.8	251.1	105.3	27.8	1250144	1.37543e+06	22644900	19295974	8773471	8756716	2.40633e+06	2.22962e+06
	P0A7S9 [4-13]	IAGINIPDHK		0	2	539.306	38.108	7	13.8	256.8	105.6	23.8	290820	345263	6.39462e+06	5.41356e+06	2.41428e+06	2425460	527286	563337
	P0A7S9 [45-57]	ISELSEGQIDTLR		0	2	730.883	44.612	4	13.2	262.8	102.2	21.8	39879.3	43499	906481	757295	323895	320192	62016.4	76270.8
	P0A7S9 [45-62]	ISELSEGQIDTLRDEVAK		1	2	1002.02	49.8135	11	12.3	252.8	105.7	29.2	955586	866178	2.01532e+07	1.73552e+07	7.55077e+06	8.09215e+06	2.1503e+06	2.16944e+06
	P0A7S9 [63-70]	FVVEGDLR		0	2	467.754	39.9966	8	13.5	270	94.8	21.7	489630	544736	11260016	9519216	3655097	3614897	807093	855037
	P0A7S9 [63-71]	FVVEGDLRR		1	3	364.204	35.3116	5	18.3	245.5	97.4	38.8	136969	154526	2.2495e+06	1.68696e+06	823882	724274	295267	320671
	P0A7S9 [72-78]	EISMSIK		0	2	404.218	36.3965	10	12.7	266.3	98.7	22.2	108273	135598	2999758	2.15669e+06	901730	986326	191129	236059
	P0A7S9 [72-78]	EISMSIK	1xOxidation [M4]	0	2	412.215	25.3813	4	6.3	267	100.3	26.5	53636.9	102819	3.4815e+06	2.87456e+06	1.23088e+06	1.14776e+06	282822	347460
	P0A7S9 [80-87]	LMDLGCYR	1xCarbamidomethyl [C6]	0	2	514.238	43.9543	4	15.7	239.3	116.3	28.7	124924	133424	2.11939e+06	1825549	957613	954135	217506	256571
	P0A7S9 [80-87]	LMDLGCYR	1xOxidation [M2]; 1xCarbamidomethyl [C6]	0	2	522.237	36.6978	5	15	239.5	116.2	29.3	241153	270952	4.74593e+06	3.49572e+06	1940429	2.01442e+06	502764	492627
FALSE	C4ZRR1	Small ribosomal subunit protein uS2 [OS=Escherichia coli BW2952]	61	12	12	26.7	7.14	81	134.8	157.7	75.9	31.6	1.95554e+07	2.1613e+07	2.68555e+07	2.15334e+07	1.14823e+07	1.1655e+07	4.72463e+06	4.92938e+06
	Positions in Master Proteins	Sequence	Modifications	# Missed Cleavages	PSM Charge (by Search Engine): Sequest HT	PSM m/z [Da] (by Search Engine): Sequest HT	PSM RT [min] (by Search Engine): Sequest HT	# PSMs	Abundances (Grouped): 1	Abundances (Grouped): 2	Abundances (Grouped): 3	Abundances (Grouped): 4	Abundance: F5: Sample, 1	Abundance: F6: Sample, 1	Abundance: F7: Sample, 2	Abundance: F8: Sample, 2	Abundance: F9: Sample, 3	Abundance: F10: Sample, 3	Abundance: F11: Sample, 4	Abundance: F12: Sample, 4
	C4ZRR1 [114-128]	LKDLETQSQDGTFDK		1	2	862.922	34.0518	9	155.8	140.6	73.9	29.6	3.072e+06	3.42066e+06	3.25032e+06	2.63202e+06	1.63231e+06	1.4473e+06	568506	668828
	C4ZRR1 [116-128]	DLETQSQDGTFDK		0	2	742.331	35.1779	5	107.3	209.3	53.3	30.1	630988	687747	1.49565e+06	1.10426e+06	335927	318608	177286	192508
	C4ZRR1 [144-152]	LENSLGGIK		0	2	465.766	34.3827	7	143	159.2	70.3	27.5	3.64167e+06	4.11544e+06	4717457	3.93568e+06	1.92871e+06	1.87992e+06	692677	798974
	C4ZRR1 [175-208]	EANNLGIPVFAIVDTNSDPDGVDFVIPGNDDAIR		0	3	1190.59	72.8227	2	109.3	161.3	83.6	45.7	156501	133394	228578	198829	103742	117627	59012.1	61837.8
	C4ZRR1 [2-7]	ATVSMR		0	2	332.676	22.787	3	62.9	222.5	85	29.7	113911	191635	584135	468137	194618	205155	63163.9	77131
	C4ZRR1 [209-222]	AVTLYLGAVAATVR		0	2	702.915	57.3843	9	64	170.4	110.8	54.8	882241	992018	2.76558e+06	2.24262e+06	1.55297e+06	1.69062e+06	838031	766411
	C4ZRR1 [226-241]	SQDLASQAEESFVEAE		0	2	870.385	56.8316	7	67.4	193.3	93.2	46	235547	267691	816637	634499	325060	370120	173898	168906
	C4ZRR1 [27-35]	MKPFIFGAR		0	2	533.797	45.2752	2	180.9	97.8	89.2	32.1	355404	415213	256304	168232	183601	195344	64254.5	72374.5
	C4ZRR1 [38-45]	VHIINLEK		0	2	483.293	35.7786	9	145.9	163.1	65.1	25.9	4.1526e+06	4.60039e+06	5.49131e+06	4.34467e+06	1.89255e+06	2.0056e+06	738855	815583
	C4ZRR1 [46-59]	TVPMFNEALAELNK		0	2	788.905	61.3927	5	181.5	109.2	75.8	33.5	885341	998384	672275	476043	381664	404372	210844	142634
	C4ZRR1 [46-59]	TVPMFNEALAELNK	1xOxidation [M4]	0	2	796.903	55.0394	7	139.4	156.4	73.6	30.7	2.26442e+06	2.45962e+06	2.86024e+06	2.45122e+06	1.16675e+06	1.33202e+06	541729	497779
	C4ZRR1 [67-74]	ILFVGTKR		1	2	467.298	35.6683	2	194.6	99	66.1	40.3	359781	330981	188644	163537	114495	119987	69684.4	73461.7
	C4ZRR1 [82-95]	DAALSCDQFFVNHR	1xCarbamidomethyl [C6]	0	2	840.382	46.1315	14	142	151.5	79.2	27.4	2.80497e+06	2.99985e+06	3.52837e+06	2.71365e+06	1.66992e+06	1.56835e+06	526690	592954
FALSE	P0A7W1	Small ribosomal subunit protein uS5 [OS=Escherichia coli K-12]	75	10	10	17.6	10.11	77	10.1	218.6	98.4	72.9	1.05967e+06	1.07953e+06	2.58158e+07	2.08202e+07	1.04054e+07	1.04748e+07	7.54607e+06	7.93054e+06
	Positions in Master Proteins	Sequence	Modifications	# Missed Cleavages	PSM Charge (by Search Engine): Sequest HT	PSM m/z [Da] (by Search Engine): Sequest HT	PSM RT [min] (by Search Engine): Sequest HT	# PSMs	Abundances (Grouped): 1	Abundances (Grouped): 2	Abundances (Grouped): 3	Abundances (Grouped): 4	Abundance: F5: Sample, 1	Abundance: F6: Sample, 1	Abundance: F7: Sample, 2	Abundance: F8: Sample, 2	Abundance: F9: Sample, 3	Abundance: F10: Sample, 3	Abundance: F11: Sample, 4	Abundance: F12: Sample, 4
	P0A7W1 [113-126]	AVLEVAGVHNVLAK		0	2	710.419	44.5487	17	5.9	205.8	109.1	79.2	186560	124340	5.80196e+06	4.80581e+06	2851348	2.74881e+06	1.99469e+06	2068389
	P0A7W1 [127-138]	AYGSTNPINVVR		0	2	645.845	39.8158	8	11.9	204.8	106.7	76.6	177680	218749	3.9266e+06	2.91184e+06	1.74238e+06	1.78222e+06	1.2047e+06	1.32664e+06
	P0A7W1 [139-156]	ATIDGLENMNSPEMVAAK	2xOxidation [M9; M14]	0	2	961.946	39.0946	5	10.2	218.6	95.2	76.1	25289.6	21060.4	589414	415331	209799	221279	165681	178944
	P0A7W1 [15-20]	LIAVNR		0	2	343.222	28.2267	2	13.5	219.9	96.3	70.3	85530.7	125001	1.82852e+06	1.54941e+06	753751	721080	476201	608711
	P0A7W1 [160-167]	SVEEILGK		0	2	437.747	39.4793	4	11.5	188.5			172813		3.12308e+06	2.58326e+06
	P0A7W1 [30-45]	IFSFTALTVVGDGNGR		0	2	827.433	61.3004	7	11.6	168.7	120.9	98.8	109158	97753	1.5702e+06	1.4453e+06	1.02591e+06	1.13613e+06	1.01169e+06	769493
	P0A7W1 [46-52]	VGFGYGK		0	2	364.192	33.2845	9	18.2	201	104.1	76.6	105454	137729	1.65546e+06	1.07093e+06	691983	687578	492004	523269
	P0A7W1 [55-62]	EVPAAIQK		0	2	428.25	27.0286	1	11	219.8	97.9	71.3		86874.1	1.78682e+06	1.6748e+06	803638	739144	513468	612700
	P0A7W1 [70-86]	NMINVALNNGTLQHPVK		0	3	621.669	47.1373	5	8	201.1	108.8	82.1	36075.3	30601.6	859209	805004	451696	448445	324880	355138
	P0A7W1 [70-86]	NMINVALNNGTLQHPVK	1xOxidation [M2]	0	3	627.001	40.4507	4	7.5	203.8	109.4	79.3	36460.1	50468.7	1.28889e+06	1.0642e+06	595327	664011	426522	486950
	P0A7W1 [94-112]	VFMQPASEGTGIIAGGAMR		0	2	946.972	50.7847	3		128.2	96.9	74.8			265522	147673	138690	161486	110216	121173
	P0A7W1 [94-112]	VFMQPASEGTGIIAGGAMR	1xOxidation [M]	0	2	954.968	46.2257	5		158	78.3	63.7			613537	447800	250687	269284	206047	216827
	P0A7W1 [94-112]	VFMQPASEGTGIIAGGAMR	2xOxidation [M3; M18]	0	3	642.314	41.9067	7	15.8	225.6	92.3	66.3	124646	186957	2.50656e+06	1.89881e+06	890247	895323	619967	662302
FALSE	P42641	GTPase ObgE/CgtA [OS=Escherichia coli K-12]	53	16	16	43.3	4.88	75		236.7	1.9	61.5			6.4339e+07	5.19723e+07	641942	328761	1.44096e+07	1.56451e+07
	Positions in Master Proteins	Sequence	Modifications	# Missed Cleavages	PSM Charge (by Search Engine): Sequest HT	PSM m/z [Da] (by Search Engine): Sequest HT	PSM RT [min] (by Search Engine): Sequest HT	# PSMs	Abundances (Grouped): 1	Abundances (Grouped): 2	Abundances (Grouped): 3	Abundances (Grouped): 4	Abundance: F5: Sample, 1	Abundance: F6: Sample, 1	Abundance: F7: Sample, 2	Abundance: F8: Sample, 2	Abundance: F9: Sample, 3	Abundance: F10: Sample, 3	Abundance: F11: Sample, 4	Abundance: F12: Sample, 4
	P42641 [120-129]	GGWHGLGNTR		0	3	352.177	31.9116	8		219.4	1.3	79.3			1.75482e+06	1.3085e+06	7144.58	11555.8	504379	595467
	P42641 [186-202]	VADYPFTTLVPSLGVVR		0	2	917.51	66.0392	7		217.4	2.3	80.3			2.53945e+06	2.13282e+06	39332.9	14886.7	837850	881386
	P42641 [208-230]	SFVVADIPGLIEGAAEGAGLGIR		0	3	738.071	79.5844	10		211.7	5.6	82.6			1.85364e+06	1.38413e+06	57970.4	31382.8	643847	606767
	P42641 [240-260]	VLLHLIDIDPIDGTDPVENAR		0	3	772.413	60.5936	7		229.7	2.4	67.9			1.08204e+07	9.04843e+06	159698	67748.9	2.83362e+06	3.01849e+06
	P42641 [261-268]	IIISELEK		0	2	472.787	43.3666	2		234.9	1.5	63.5			11856801	9466010	89971.5	53208.5	2.75756e+06	2.97537e+06
	P42641 [269-278]	YSQDLATKPR		0	2	589.811	25.0816	6		238.1	0.8	61			9077121	6.71314e+06	32692.7	22767.1	1.8712e+06	2.13809e+06
	P42641 [285-290]	IDLLDK		0	2	358.713	39.0679	2		185.7		14.3			4562904	3.71874e+06			294469	339425
	P42641 [285-296]	IDLLDKVEAEEK		1	2	701.377	48.0725	2				100							931493	746795
	P42641 [299-309]	AIAEALGWEDK		0	2	601.807	46.835	1		278.9	0.9	20.2			4799282	3.97269e+06	13595.3	14022.8	307127	326569
	P42641 [299-322]	AIAEALGWEDKYYLISAASGLGVK		1	3	842.449	64.9045	2		8.7		191.3			11211.5				238388	256723
	P42641 [3-24]	FVDEASILVVAGDGGNGCVSFR	1xCarbamidomethyl [C18]	0	2	1135.05	60.27	2		160.3	54.4	85.3			236390	247162	91344.3	73548.3	121622	136014
	P42641 [310-322]	YYLISAASGLGVK		0	2	671.374	53.7484	5		269.6	2.1	28.3			7562943	6568727	90255.5	33269.5	713376	766233
	P42641 [32-60]	GGPDGGDGGDGGDVWMEADENLNTLIDYR		0	3	999.092	70.401	2		209.7	14.7	75.6			267524	276859	19047		93748.5	102558
	P42641 [32-60]	GGPDGGDGGDGGDVWMEADENLNTLIDYR	1xOxidation [M16]	0	3	1004.43	68.2537	2		144.6		55.4			239778	201679			73885.7	95980
	P42641 [349-358]	VEFMWDDYHR		0	3	466.537	49.5785	2		145.2		54.8			203963	151789			67894.7	64981.5
	P42641 [349-358]	VEFMWDDYHR	1xOxidation [M4]	0	2	707.299	45.4966	5		245.2	1.9	52.9			2.31842e+06	1.80169e+06	40890.7	6370.43	423884	458388
	P42641 [90-95]	VPVGTR		0	2	314.692	20.1973	4		162.5		37.5			879180	727540			162956	208442
	P42641 [96-110]	VIDQGTGETMGDMTK		0	2	791.858	36.0814	3		134.8		65.2			1577785	1.30868e+06			597380	807374
	P42641 [96-110]	VIDQGTGETMGDMTK	1xOxidation [M]	0	2	799.856	28.6721	2		157.3		42.7			1.99169e+06	1.60508e+06			440057	533917
	P42641 [96-110]	VIDQGTGETMGDMTK	2xOxidation [M10; M13]	0	2	807.853	24.3764	1		148.3		51.7			1.78572e+06	1338645			494909	586165
FALSE	P07118	Valine--tRNA ligase [OS=Escherichia coli K-12]	37	25	25	108.1	5.34	74	213.1	137	37.9	11.9	1.3048e+07	1.5126e+07	9.82646e+06	8.29859e+06	2.40037e+06	2.60273e+06	786775	788578
	Positions in Master Proteins	Sequence	Modifications	# Missed Cleavages	PSM Charge (by Search Engine): Sequest HT	PSM m/z [Da] (by Search Engine): Sequest HT	PSM RT [min] (by Search Engine): Sequest HT	# PSMs	Abundances (Grouped): 1	Abundances (Grouped): 2	Abundances (Grouped): 3	Abundances (Grouped): 4	Abundance: F5: Sample, 1	Abundance: F6: Sample, 1	Abundance: F7: Sample, 2	Abundance: F8: Sample, 2	Abundance: F9: Sample, 3	Abundance: F10: Sample, 3	Abundance: F11: Sample, 4	Abundance: F12: Sample, 4
	P07118 [143-154]	FTMDEGLSNAVK	1xOxidation [M3]	0	2	664.315	36.7097	3	207.8	148.1	35.1	9.1	449539	601935	437390	314190	87275.2	88309.8	31413	16378.2
	P07118 [181-191]	TAISDLEVENR		0	2	623.818	40.6645	5	195.3	149.4	44.2	11.1	1.36255e+06	1.6368e+06	1.19421e+06	1.09259e+06	305236	373290	96755.9	74542.4
	P07118 [202-209]	YPLADGAK		0	2	417.722	28.9458	4	180.6	172	36	11.4	346843	491223	437290	353572	85819.4	78735.7	26608.7	25712.8
	P07118 [215-241]	DYLVVATTRPETLLGDTGVAVNPEDPR		0	3	966.833	58.3304	2	171.5	105.8	22.7		750403	803192	535043	429102	89231.9	118740
	P07118 [242-248]	YKDLIGK		1	2	418.748	28.9464	1	244.5	98.2	44.3	13	320299	349685	157347	114828	60402	60969.2	15770.9	19968.4
	P07118 [249-257]	YVILPLVNR		0	2	543.837	53.911	4	191.1	161.3	34.3	13.3	633914	631615	543506	524808	105317	122691	47309.2	40801
	P07118 [278-292]	ITPAHDFNDYEVGKR		1	3	587.955	35.569	1	225.2	137	28.1	9.7	254111	302567	194504	146214	37401.3	32047.7	11985.5
	P07118 [293-308]	HALPMINILTFDGDIR	1xOxidation [M5]	0	3	614.658	59.4318	3	211.5	134.8	38.1	15.6	234534	254156	171241	141350	45235.7	42785.6	18020.8
	P07118 [309-317]	ESAQVFDTK		0	2	512.752	30.9661	4	195.5	149.4	41	14.1	911709	1.1321e+06	822315	732951	207539	218340	61039.9	87312.4
	P07118 [318-334]	GNESDVYSSEIPAEFQK		0	2	950.436	48.3566	3	196.4	151.8	38.3	13.5	406176	469460	341154	334140	82843	87523	33188.9	27245.2
	P07118 [342-369]	KAVVAAVDALGLLEEIKPHDLTVPYGDR		1	4	748.163	65.2589	1	113.9	163		23	97274.1	84727	176039	95843.4			19744.9	17023.7
	P07118 [343-369]	AVVAAVDALGLLEEIKPHDLTVPYGDR		0	4	716.141	69.286	1	181.5	96.9	21.6		151199	267106	124625	92367.2	25907.1	22154.1
	P07118 [370-385]	GGVVIEPMLTDQWYVR	1xOxidation [M8]	0	2	939.975	58.047	2	191.8	85.2	23		158924	156404	73815.7	66390.2	14869.6	24035.7
	P07118 [386-407]	ADVLAKPAVEAVENGDIQFVPK		0	3	770.75	54.4066	3	222	132	29.7	16.3	431036	537996	309679	264508	64049.9	64709.9	37656.9	33232.9
	P07118 [4-20]	TYNPQDIEQPLYEHWEK		0	3	730.676	51.3004	2	228.6	114.4	42.5	14.5	545654	677326	343465	269730	101834	125461	33965.2	43665.6
	P07118 [419-427]	DIQDWCISR	1xCarbamidomethyl [C6]	0	2	596.776	46.7059	3	184.8	89.3	25.9		296418	361318	183561	136197	45967.3	45805.6
	P07118 [457-467]	ENNLGADVVLR		0	2	600.322	42.9442	1	161.3	195.9	32.5	10.4	168884	171879	241463	177366	38359.7	30648.1	10956
	P07118 [616-626]	FTLAALASTGR		0	2	554.312	51.7179	6	213.4	131.9	39.8	14.9	958341	1.06952e+06	657611	595412	170312	209512	63830.2	77928
	P07118 [72-92]	NTLWQVGTDHAGIATQMVVER		0	3	776.06	53.9991	3	173.7	90.8	35.5		424564	502992	268989	216775	79326.3	112216
	P07118 [802-808]	QAIVAVR		0	2	378.739	29.9043	3	214.3	130.6	40	15.1	263680	315123	197322	156447	56685.9	51153.4	17669.9	23421.2
	P07118 [812-827]	AEMNIAPGKPLELLLR	1xOxidation [M3]	0	3	594.339	55.3786	2	200.6	134.6	46.8	18	480677	544751	355830	331549	120096	118503	44767.7	46987.9
	P07118 [850-868]	LESITVLPADDKGPVSVTK		1	3	657.032	45.8506	6	228.3	121.8	35.5	14.4	1.46506e+06	1601900	900113	741508	237521	238625	88657.2	106032
	P07118 [869-891]	IIDGAELLIPMAGLINKEDELAR		1	3	832.124	70.9154	1	298.1	62.8	26.1	13	262074	294309	66792	51263.7	21525.9	27382.4	14163.8	10337.1
	P07118 [910-918]	LANEGFVAR		0	2	488.765	33.7744	6	211.6	133.4	40.3	14.7	912440	1.02821e+06	665470	560582	186116	182838	63702.4	70772.4
	P07118 [941-951]	LIEQQAVIAAL		0	2	584.85	59.0246	4	232.1	113.7	37.4	16.8	761668	839751	427685	358903	131498	126256	49567.7	67216.7
FALSE	B1XG23	Large ribosomal subunit protein bL20 [OS=Escherichia coli str. K-12 substr. DH10B]	58	12	12	13.5	11.47	71	26.8	225.8	91.6	55.8	1.99101e+07	2.24322e+07	1.98237e+08	159927006	7.04798e+07	7.40867e+07	4.28418e+07	4.52438e+07
	Positions in Master Proteins	Sequence	Modifications	# Missed Cleavages	PSM Charge (by Search Engine): Sequest HT	PSM m/z [Da] (by Search Engine): Sequest HT	PSM RT [min] (by Search Engine): Sequest HT	# PSMs	Abundances (Grouped): 1	Abundances (Grouped): 2	Abundances (Grouped): 3	Abundances (Grouped): 4	Abundance: F5: Sample, 1	Abundance: F6: Sample, 1	Abundance: F7: Sample, 2	Abundance: F8: Sample, 2	Abundance: F9: Sample, 3	Abundance: F10: Sample, 3	Abundance: F11: Sample, 4	Abundance: F12: Sample, 4
	B1XG23 [104-112]	VAFTALVEK		0	2	489.287	46.3043	11	30.5	223.3	91.1	55	5.72342e+06	5925154	47433768	38358152	17500764	17305622	10586550	10435295
	B1XG23 [34-41]	VAFQAVIK		0	2	438.271	41.9268	6	31.6	242	82.5	43.9	5.03335e+06	5.58368e+06	46554652	35329920	13534147	14119588	7.17139e+06	7556869
	B1XG23 [42-48]	AGQYAYR		0	2	414.704	25.247	8	17.8	236.7	95.6	50	577186	896227	12056341	7.62676e+06	3.97514e+06	3.77137e+06	1.84771e+06	2.21877e+06
	B1XG23 [59-64]	QLWIAR		0	2	393.735	41.9674	4	38.1	214.8	87.3	59.8	695365	835577	4813151	3.83825e+06	1.75532e+06	1.73635e+06	1.18929e+06	1.20494e+06
	B1XG23 [6-11]	RGVIAR		1	2	336.218	19.7692	1	15.7	228	107.8	48.5	673355	973589	12532524	11085675	5613494	5537713	2198412	2860184
	B1XG23 [71-78]	QNGISYSK		0	2	448.727	24.9164	4	13.1	187.6	119	80.2	213435	330661	4695348	3.06024e+06	2.48952e+06	2.32484e+06	1.47759e+06	1.77979e+06
	B1XG23 [79-85]	FINGLKK		1	2	410.258	27.2048	2	32.5	209.9	92	65.6	813150	879036	5.7144e+06	5232081	2365019	2.42763e+06	1.68517e+06	1.73371e+06
	B1XG23 [85-93]	KASVEIDRK		2	3	349.205	20.0006	5	32.6	129.5	131.8	106.1	97731.9	168005	553775	468230	498589	538909	358347	486308
	B1XG23 [86-92]	ASVEIDR		0	2	395.209	26.8686	4	12.6	261.7	79.8	45.9	183823	279780	4919243	4509791	1.43343e+06	1.44044e+06	750265	908545
	B1XG23 [86-93]	ASVEIDRK		1	2	459.256	22.5075	7	16.3	232.4	91.7	59.6	801851	1.22697e+06	15148974	13248978	5.49976e+06	5688234	3432412	3.85181e+06
	B1XG23 [93-103]	KILADIAVFDK		1	2	616.867	49.6879	7	31.5	153.6	130.7	84.3	230668	234921	1.21168e+06	1.0658e+06	948793	985335	620913	625832
	B1XG23 [94-103]	ILADIAVFDK		0	2	552.82	54.4195	12	27.6	217.3	91.1	64	4866795	5.09865e+06	42603296	36103132	14865840	18210632	11523724	11581741
FALSE	C4ZUG5	Large ribosomal subunit protein uL14 [OS=Escherichia coli BW2952]	56	7	7	13.5	10.42	68	2.8	261.8	116.2	19.1	421223	668373	5.52883e+07	4.30097e+07	2.15019e+07	2.17925e+07	3.46138e+06	3.67281e+06
	Positions in Master Proteins	Sequence	Modifications	# Missed Cleavages	PSM Charge (by Search Engine): Sequest HT	PSM m/z [Da] (by Search Engine): Sequest HT	PSM RT [min] (by Search Engine): Sequest HT	# PSMs	Abundances (Grouped): 1	Abundances (Grouped): 2	Abundances (Grouped): 3	Abundances (Grouped): 4	Abundance: F5: Sample, 1	Abundance: F6: Sample, 1	Abundance: F7: Sample, 2	Abundance: F8: Sample, 2	Abundance: F9: Sample, 3	Abundance: F10: Sample, 3	Abundance: F11: Sample, 4	Abundance: F12: Sample, 4
	C4ZUG5 [1-17]	MIQEQTMLNVADNSGAR		0	2	939.447	46.358	8	1.6	228.5	143.6	26.2		12820	2.12536e+06	1.48406e+06	1.07356e+06	1.15975e+06	204884	202899
	C4ZUG5 [1-17]	MIQEQTMLNVADNSGAR	1xOxidation [M]	0	2	947.444	44.0121	17		192	94.3	13.7			3.05711e+06	2.31845e+06	1.23134e+06	1.38772e+06	190070	190429
	C4ZUG5 [1-17]	MIQEQTMLNVADNSGAR	2xOxidation [M1; M7]	0	2	955.439	35.5641	10	8.7	252.5	113.6	25.2	79660.6	82034.9	2.59342e+06	2.11938e+06	1.04698e+06	1.06237e+06	216715	251562
	C4ZUG5 [24-30]	VLGGSHR		0	2	363.206	18.2927	6	0.7	270.8	111.8	16.7	5818.41	17294.8	4.10251e+06	3.71709e+06	1.75499e+06	1481625	235427	245133
	C4ZUG5 [31-40]	RYAGVGDIIK		1	2	546.314	37.8984	7	1.8	240.5	135.5	22.1	17111.9	21719.7	2.93323e+06	2.22116e+06	1.34755e+06	1.5347e+06	232103	237748
	C4ZUG5 [32-40]	YAGVGDIIK		0	2	468.263	42.8595	5	2.9	265.7	113.5	17.9	116981	142211	13445326	10369927	4976223	5109662	763626	825207
	C4ZUG5 [71-78]	RPDGSVIR		0	2	450.256	22.5228	2	2.7	275	105.9	16.4	49417	204406	11191876	9668997	4.14403e+06	3871710	571218	673487
	C4ZUG5 [79-98]	FDGNACVLLNNNSEQPIGTR	1xCarbamidomethyl [C6]	0	2	1110.03	47.4437	9		176.8	106.8	16.3			5.67589e+06	3.10106e+06	2.49219e+06	2.57826e+06	394051	380421
	C4ZUG5 [99-105]	IFGPVTR		0	2	395.234	35.375	4	5.1	269.9	105.3	19.7	152234	187887	10163525	8009622	3.43501e+06	3.60666e+06	653288	665930
FALSE	C4ZU30	Large ribosomal subunit protein bL25 [OS=Escherichia coli BW2952]	69	7	7	10.7	9.6	63	12.1	237.3	120.1	30.6	1.12661e+06	1.30598e+06	2.65291e+07	2.14069e+07	1.17335e+07	1.23922e+07	3.1477e+06	3.00454e+06
	Positions in Master Proteins	Sequence	Modifications	# Missed Cleavages	PSM Charge (by Search Engine): Sequest HT	PSM m/z [Da] (by Search Engine): Sequest HT	PSM RT [min] (by Search Engine): Sequest HT	# PSMs	Abundances (Grouped): 1	Abundances (Grouped): 2	Abundances (Grouped): 3	Abundances (Grouped): 4	Abundance: F5: Sample, 1	Abundance: F6: Sample, 1	Abundance: F7: Sample, 2	Abundance: F8: Sample, 2	Abundance: F9: Sample, 3	Abundance: F10: Sample, 3	Abundance: F11: Sample, 4	Abundance: F12: Sample, 4
	C4ZU30 [1-9]	MFTINAEVR		0	2	540.779	45.6524	6	14.9	192.8	154.8	37.6	106871	124354	1.79071e+06	1245477	1.19584e+06	1.20211e+06	288356	293443
	C4ZU30 [1-9]	MFTINAEVR	1xOxidation [M1]	0	2	548.777	41.6492	17	13.5	245.7	113.8	27	227715	322683	5392628	4509758	2171004	2402456	533974	550698
	C4ZU30 [22-34]	AANKFPAIIYGGK		1	3	450.59	44.4162	8	14.1	208.9	145.2	31.8	81840.1	89547.8	1.42639e+06	1.1283e+06	897259	866496	172643	215729
	C4ZU30 [35-46]	EAPLAIELDHDK		0	2	675.85	41.6486	5		200.8	84.9	14.3			8.4369e+06	6642173	3.12843e+06	3.19831e+06	497802	574129
	C4ZU30 [47-53]	VMNMQAK		0	2	411.204	24.5683	1	4.8	246.1	126	23.1	10149.3	18049.9	832801	566760	338498	365297	61118.1	68202.7
	C4ZU30 [54-68]	AEFYSEVLTIVVDGK		0	2	835.434	69.9448	12	24.9	211.6	116	47.5	523576	532766	4.85104e+06	4.14893e+06	2.31952e+06	2.60761e+06	1.18079e+06	858524
	C4ZU30 [86-93]	LQHIDFVR		0	2	514.288	38.0828	9	11.4	232.7	132.6	23.3	62704.7	82865.4	1.62326e+06	1.34538e+06	811417	874219	148906	146583
	C4ZU30 [86-94]	LQHIDFVRA		1	2	549.807	39.8903	5	15.2	243.6	106.9	34.3	113754	135715	2.17534e+06	1.82017e+06	871553	875736	264108	297230
FALSE	B1X833	Serine--tRNA ligase [OS=Escherichia coli str. K-12 substr. DH10B]	57	18	18	48.4	5.5	61	188.6	144.1	53.5	13.8	8.70375e+06	9.8271e+06	7.81517e+06	6.38829e+06	2.65062e+06	2.59796e+06	666647	686664
	Positions in Master Proteins	Sequence	Modifications	# Missed Cleavages	PSM Charge (by Search Engine): Sequest HT	PSM m/z [Da] (by Search Engine): Sequest HT	PSM RT [min] (by Search Engine): Sequest HT	# PSMs	Abundances (Grouped): 1	Abundances (Grouped): 2	Abundances (Grouped): 3	Abundances (Grouped): 4	Abundance: F5: Sample, 1	Abundance: F6: Sample, 1	Abundance: F7: Sample, 2	Abundance: F8: Sample, 2	Abundance: F9: Sample, 3	Abundance: F10: Sample, 3	Abundance: F11: Sample, 4	Abundance: F12: Sample, 4
	B1X833 [131-137]	EFDFEVR		0	2	471.222	47.2635	5	209.3	134.5	40.9	15.3	782019	843978	601588	452934	137360	183648	54461.2	64610.2
	B1X833 [138-156]	DHVTLGEMHSGLDFAAAVK	1xOxidation [M8]	0	3	671.994	44.9894	4	151.1	176.6	54.4	17.9	346287	354433	439695	381361	143243	111284	39839.7	43470.3
	B1X833 [213-247]	FAGDLFHTRPLEEEADTSNYALIPTAEVPLTNLVR		0	4	975.751	65.3789	1	191.7	89.3	19		429442	593419	275078	201210	103927	24158.5
	B1X833 [248-259]	GEIIDEDDLPIK		0	2	678.847	50.3272	6	184.8	138.1	56.1	21	613983	689165	546671	431836	191671	203105	75599.6	72365.9
	B1X833 [30-36]	LGALEER		0	2	394.219	29.2913	6	185.2	146.6	53.5	14.6	545460	612565	479505	436680	168696	165301	41805.6	49893.9
	B1X833 [315-324]	VLQLLGLPYR		0	2	586.364	58.7491	3	155.1	105.9	39		215807	242144	170174	142998	50297.5	65701.9
	B1X833 [315-325]	VLQLLGLPYRK		1	2	650.412	51.0488	1	169.6	94.3	36.1		177372	228789	116185	108101	36179	50839.9
	B1X833 [326-339]	IILCTGDMGFGACK	2xCarbamidomethyl [C4; C13]; 1xOxidation [M8]	0	2	779.855	44.7441	2	176.1	78.9	45		454288	502296	228144	200926	131082	113922
	B1X833 [340-354]	TYDLEVWIPAQNTYR		0	2	934.963	60.0745	2	225	113.8	43.6	17.7	169045	185104	103632	77245.9	32700.3	35876.5	13912.1
	B1X833 [355-368]	EISSCSNVWDFQAR	1xCarbamidomethyl [C5]	0	2	849.882	50.5055	2	168.2	90.7	41.1		264271	293272	162912	138216	65491.5	70605.2
	B1X833 [384-397]	LVHTLNGSGLAVGR		0	3	465.269	37.1133	1	160.4	97.5	42.1		538614	680254	462916	292207	178141	141359
	B1X833 [398-412]	TLVAVMENYQQADGR		0	2	847.911	50.5933	5	197.2	131	54.8	17	552211	652918	463631	343344	163771	170124	54295.2	49509.2
	B1X833 [44-51]	TENLQAER		0	2	480.74	23.6342	5	98.1	208.4	70.8	22.7	278423	416361	790318	662676	247737	243746	70164.6	88574.3
	B1X833 [63-77]	ARGEDIEPLRLEVNK		2	3	580.32	40.1272	1	220.8	115.2	46.1	18	405203	426890	251612	187180	87325.5	86280.6	33200.3	34590.6
	B1X833 [78-86]	LGEELDAAK		0	2	473.249	32.0789	5	191	141.2	52.3	15.5	1.00731e+06	1.20832e+06	890931	746505	306071	298347	75367	106992
	B1X833 [87-97]	AELDALQAEIR		0	2	614.829	48.1629	8	174.5	153.3	55.1	17.1	1.34994e+06	1.20882e+06	1.1947e+06	1.05383e+06	400939	405887	124429	125295
	B1X833 [9-17]	NEPDAVAEK		0	2	486.735	22.5243	1	75.1	227	76.4	21.5	68238.4	99138.6	273107	226031	87863.5	79569	21564.4	25780.5
	B1X833 [98-125]	DIALTIPNLPADEVPVGKDENDNVEVSR		1	3	1007.18	57.2022	3	207.7	126.8	50.3	15.2	505830	589232	364372	305013	118130	148201	62009	25581.8
FALSE	B1X6F8	Small ribosomal subunit protein uS8 [OS=Escherichia coli str. K-12 substr. DH10B]	60	8	8	14.1	9.42	60	9.2	283.1	68.3	39.4	1.20276e+06	1.37959e+06	4.33853e+07	3.64897e+07	9.56693e+06	9.64022e+06	5.31948e+06	5.77302e+06
	Positions in Master Proteins	Sequence	Modifications	# Missed Cleavages	PSM Charge (by Search Engine): Sequest HT	PSM m/z [Da] (by Search Engine): Sequest HT	PSM RT [min] (by Search Engine): Sequest HT	# PSMs	Abundances (Grouped): 1	Abundances (Grouped): 2	Abundances (Grouped): 3	Abundances (Grouped): 4	Abundance: F5: Sample, 1	Abundance: F6: Sample, 1	Abundance: F7: Sample, 2	Abundance: F8: Sample, 2	Abundance: F9: Sample, 3	Abundance: F10: Sample, 3	Abundance: F11: Sample, 4	Abundance: F12: Sample, 4
	B1X6F8 [118-130]	QAGLGGEIICYVA	1xCarbamidomethyl [C10]	0	2	675.839	60.1375	3	7.8	261.8	87.9	42.5	82701.2	83267.2	3.07156e+06	2.51625e+06	861955	1.01168e+06	425574	477906
	B1X6F8 [2-13]	SMQDPIADMLTR		0	2	689.326	56.7789	6	4.2	236.8	97	62	14610.7	11511.9	810554	659704	287645	312231	193218	189677
	B1X6F8 [2-13]	SMQDPIADMLTR	1xOxidation [M]	0	2	697.324	52.7693	10	6.5	253.6	84.7	55.1	31910.7	49292.9	1.67778e+06	1.42281e+06	487056	547376	328183	343914
	B1X6F8 [2-13]	SMQDPIADMLTR	2xOxidation [M2; M9]	0	2	705.324	40.1113	9	13.8	240.8	88.6	56.8	111241	118938	2.30885e+06	1742570	730262	745601	456460	490601
	B1X6F8 [34-41]	VAIANVLK		0	2	414.271	41.7694	4	9.4	304.6	55.8	30.2	79987.8	178424	4.40828e+06	3.43138e+06	699019	727289	365798	405675
	B1X6F8 [34-50]	VAIANVLKEEGFIEDFK		1	3	641.347	61.0294	6	5.4	328.7	45.4	20.5	76262.7	60876.2	4.635e+06	3.73302e+06	553109	597673	281948	237602
	B1X6F8 [42-50]	EEGFIEDFK		0	2	557.259	48.7093	3	16.1	327.9	31.1	24.9	104218	104315	2.16198e+06	2.09813e+06	194377	210316	157485	165997
	B1X6F8 [51-64]	VEGDTKPELELTLK		0	3	524.623	43.6437	4	3.4	352.7	31.1	12.8	57322.6	64000.4	6.81433e+06	5.77049e+06	552808	554770	231344	223797
	B1X6F8 [70-77]	AVVESIQR		0	2	451.259	28.8809	2	8.7	273.4	75.7	42.2	260671	341583	10350106	8574606	2609030	2.60773e+06	1.25228e+06	1.69149e+06
	B1X6F8 [95-108]	VMAGLGIAVVSTSK		0	2	666.882	48.9035	6	11.1	240.9	86.7	61.4	130088	112604	2.7198e+06	2.54626e+06	1.02719e+06	872856	733347	613626
	B1X6F8 [95-108]	VMAGLGIAVVSTSK	1xOxidation [M2]	0	2	674.879	44.2648	7	14.8	244.5	87.6	53.1	253745	254778	4.42705e+06	3.99444e+06	1.56447e+06	1.4527e+06	893848	932739
FALSE	P0AA10	Large ribosomal subunit protein uL13 [OS=Escherichia coli K-12]	74	12	12	16	9.91	59	9.7	237.6	132.5	20.2	1.8881e+06	2.41068e+06	5.72262e+07	4.7843e+07	2.86193e+07	2.97191e+07	4.40166e+06	4.50441e+06
	Positions in Master Proteins	Sequence	Modifications	# Missed Cleavages	PSM Charge (by Search Engine): Sequest HT	PSM m/z [Da] (by Search Engine): Sequest HT	PSM RT [min] (by Search Engine): Sequest HT	# PSMs	Abundances (Grouped): 1	Abundances (Grouped): 2	Abundances (Grouped): 3	Abundances (Grouped): 4	Abundance: F5: Sample, 1	Abundance: F6: Sample, 1	Abundance: F7: Sample, 2	Abundance: F8: Sample, 2	Abundance: F9: Sample, 3	Abundance: F10: Sample, 3	Abundance: F11: Sample, 4	Abundance: F12: Sample, 4
	P0AA10 [100-106]	VIEIAVK		0	2	386.252	37.2629	6	9.8	243.8	125.9	20.4	294254	311520	8320581	6756800	3812810	3.9293e+06	605443	652153
	P0AA10 [124-142]	VYAGNEHNHAAQQPQVLDI		0	3	702.011	42.0743	7	8.3	254.7	120.2	16.8	196831	221330	7163082	5.67322e+06	3.0112e+06	3.00454e+06	407415	436317
	P0AA10 [13-23]	RDWYVVDATGK		1	2	655.33	41.0795	7	4.9	243.8	134.7	16.7	26234.2	36795.9	1.75241e+06	1.3853e+06	860558	860693	102207	111051
	P0AA10 [14-23]	DWYVVDATGK		0	2	577.28	47.5831	2	7.4	235	135.9	21.7	46778.7	48755.1	1.65247e+06	1.38484e+06	824148	928651	132479	148022
	P0AA10 [28-34]	LATELAR		0	2	387.229	29.1396	2	10.1	243.6	128	18.4	216850	314370	6.49678e+06	6.15155e+06	3.40784e+06	3.23828e+06	452300	503336
	P0AA10 [3-12]	TFTAKPETVK		0	2	561.313	26.1547	7	23.3	239.6	114.8	22.3	541208	833489	7.68256e+06	6.20516e+06	3.38678e+06	3.22977e+06	587379	705287
	P0AA10 [3-13]	TFTAKPETVKR		1	3	426.578	23.9674	5	11.5	196.7	164.9	26.8	101663	114383	2.07442e+06	1.63776e+06	1534209	1.55695e+06	236373	267323
	P0AA10 [42-61]	AEYTPHVDTGDYIIVLNADK		0	3	745.375	53.3089	2	4.9	234.5	139.9	20.7	187121	176732	9786847	7619436	4586829	5780850	885638	654134
	P0AA10 [62-68]	VAVTGNK		0	2	344.703	19.2105	2	2.2	241.3	136.4	20.1	11327.3	26446.8	1956301	1.89222e+06	1.09873e+06	1.07697e+06	152250	168928
	P0AA10 [62-69]	VAVTGNKR		1	2	422.753	18.1969	4	2.9	210.1	164.6	22.4		8917.94	682348	629614	528893	498454	65124.3	74798.8
	P0AA10 [73-85]	VYYHHTGHIGGIK		0	3	494.594	25.689	3	12	247.8	117.3	22.9	59423.9	62692.1	1.39493e+06	1.1444e+06	664009	539271	105138	130160
	P0AA10 [86-95]	QATFEEMIAR		0	2	598.293	48.4502	6	5.3	233.4	143.2	18.2	68960.8	90013.5	3.48809e+06	3.46919e+06	2.09946e+06	2169530	275781	266242
[truncated: 563 more rows]

## Sheet: selected
								1	2	3	4	1	1	2	2	3	3	4	4
[truncated: 171 more rows]
